# Supplementary material for: β-Adrenoceptor regulation of metabolism in U937 derived macrophages
Source: Royal Society of Chemistry journal article supplement (doi:10.1039/d1mo00057h), 2021-06-03
Supplement: d1mo00057h1.pdf [file d1mo00057h1.pdf]

**Supplementary figures:**

## **$\beta$ -Adrenergic regulation of metabolism in U937-derived macrophages**

**Amanda L. Peterson**<sup>1</sup>, **Ghizal Siddiqui**<sup>1</sup>, **Erica K. Sloan**<sup>2, 3, 4, #</sup> and **Darren J. Creek**<sup>1, \*\*</sup>

<sup>1</sup>Drug Delivery, Disposition and Dynamics Theme, Monash Institute of Pharmaceutical Science, Monash University, Parkville, Victoria 3052, Australia; darren.creek@monash.edu

<sup>2</sup>Drug Discovery Biology Theme, Monash Institute of Pharmaceutical Science, Monash University, Parkville, Victoria 3052, Australia; erica.sloan@monash.edu

<sup>3</sup>Division of Cancer Surgery, Peter MacCallum Cancer Centre, Melbourne, Victoria 3000;

<sup>4</sup>Cousins Center for PNI, Semel Institute, UCLA Jonsson Comprehensive Cancer Center, and the UCLA AIDS Institute, University of California Los Angeles, Los Angeles, CA 90095, USA;

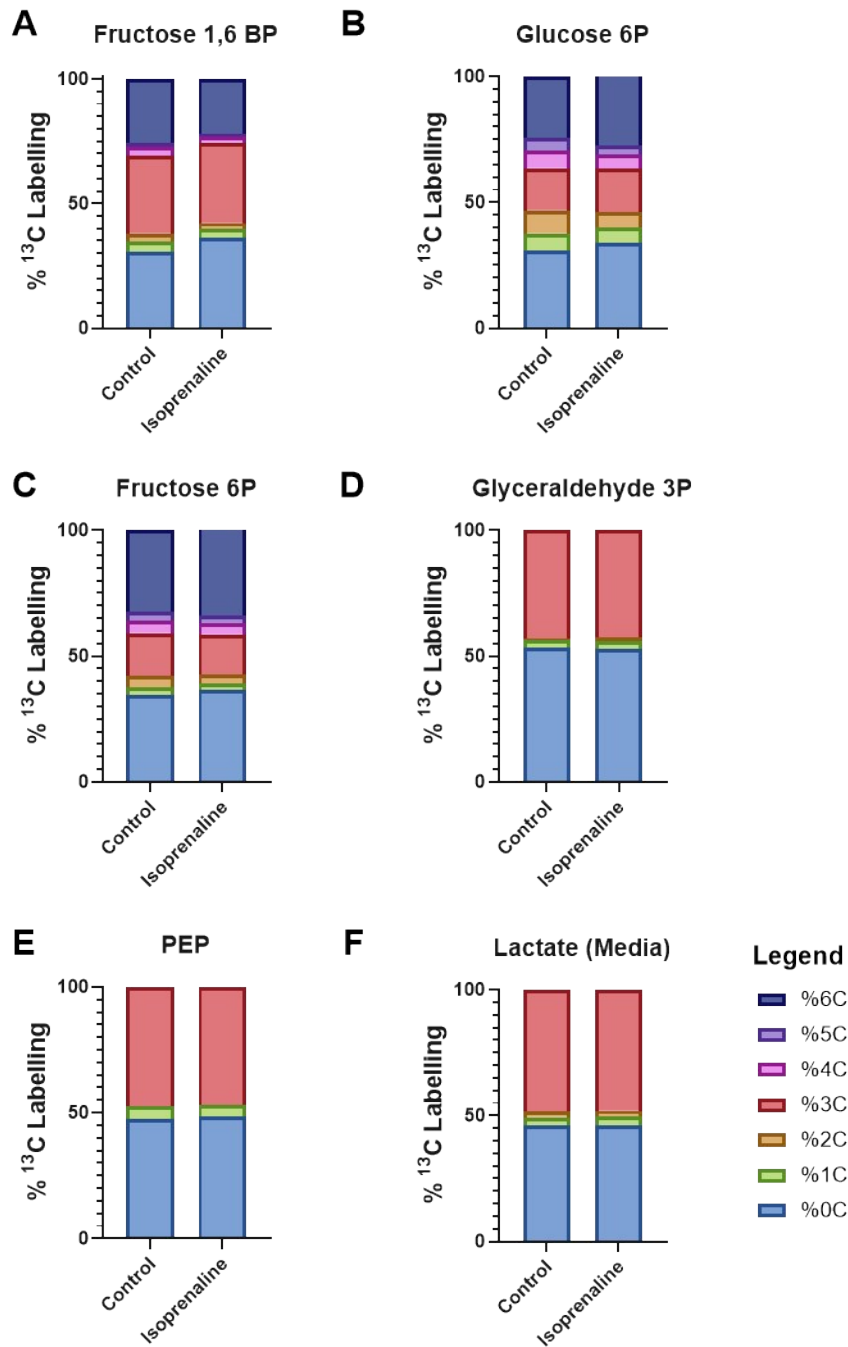

### Supplementary Figure 1: Percentage labelling of metabolites in glycolysis

A-F) Percentage of  $^{13}\text{C}$  labels in glycolytic metabolites, where differences between control and isoprenaline were  $<6\%$ . The y-axis shows the percentage of each isotopologue present in the total abundance of the corresponding metabolite. Values are from a single experiment with 4 replicates.

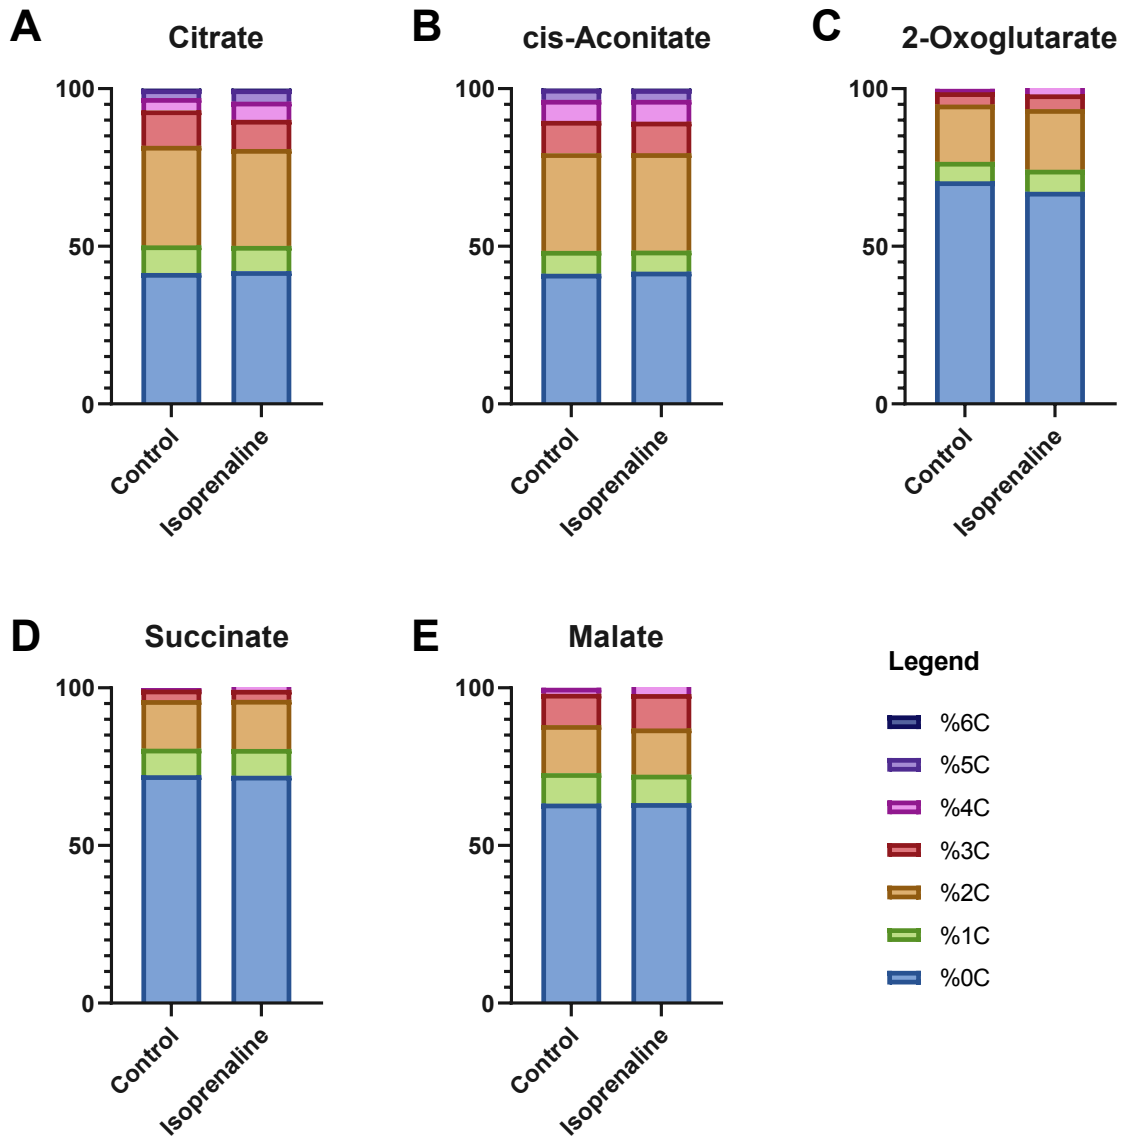

### Supplementary Figure 2: Percentage labelling of metabolites in the TCA cycle

A-E) Percentage of  $^{13}\text{C}$  labels in metabolites of the TCA cycle, where differences between control and isoprenaline were  $<5\%$ . The y-axis shows the percentage of each isotopologue present in the total abundance of the corresponding metabolite. Values are from a single experiment with 4 replicates.
