# Supplementary material for: β-Adrenoceptor regulation of metabolism in U937 derived macrophages
Source: Royal Society of Chemistry journal article supplement (doi:10.1039/d1mo00057h), 2021-06-03
Supplement: d1mo00057h3.xlsx [file d1mo00057h3.xlsx]

## Sheet: Legend
EXP1	Unlabelled experiment, 24 hour treatment
EXP2	24hr 13C-Glucose labelling, 24 hour treatment
EXP3	4hr 13C-Glucose labelling, 24 hour treatment

## Sheet: Heatmap_Metabolites
Metabolites (in order as they appear on the heatmap)
5'-Phosphoribosylglycinamide
S-(3-Methylbutanoyl)-dihydrolipoamide
5'-Phosphoribosyl-N-formylglycinamide
2-(Formamido)-N1-(5'-phosphoribosyl)acetamidine
1-(5'-Phosphoribosyl)-5-amino-4-imidazolecarboxamide
ethylpyruvate
IMP
3-amino-isobutanoic acid
D-Ribose 1,5-bisphosphate
Aminoimidazole ribotide
N-Carbamoyl-L-aspartate
2,3,5-Trihydroxytoluene
7-Prenyloxy-3',4'-dimethoxyisoflavone
FA (9:1) nonynoic acid
hydrogen iodide
2,5-Dioxopentanoate
2-Hydroxy-2,4-pentadienoate
L-Aspartate
D-Glucose
alpha-Irone
Gabaculine
gamma-L-Glutamyl-D-alanine
DL-Methionine sulfone
3-Amino-2-piperidone
Carpacin
FA(8:2)
D-Glucose 6-phosphate
D-myo-Inositol 1,2-cyclic phosphate
Tributyrin
Citrate
5-Phenyl-1,3-oxazinane-2,4-dione
FA oxo(8:0) oxo-octanoic acid
(3S,4S)-3-Hydroxytetradecane-1,3,4-tricarboxylate
Phosphocreatine
Succinate
Unidentified metabolite (m/z183.0661)
D-Asparagine
Ile-Lys-Pro
Unidentfied metabolite (m/z119.9114)
D-Fructose 6-phosphate
D-Sedoheptulose 7-phosphate
GDP
Hypotaurine
7-Methyl-2-hydroxy-6-oxoocta-2,4-dienoate
3,5/4-Trihydroxycyclohexa-1,2-dione
Nalpha-Methylhistidine
(1-Ribosylimidazole)-4-acetate
2-Ethylhexyl phthalate
dATP
Methyl5-(but-3-en-1-yl)amino-1,3,4-oxadiazole-2-carboxylate

## Sheet: EXP1_Untargeted
Metabolite	retention time	Mass	CP_control_1	CP_control_2	CP_control_3	CP_control_4	CP_isoprenaline_1	CP_isoprenaline_2	CP_isoprenaline_3	CP_isoprenaline_4	M_control_1	M_control_2	M_control_3	M_control_4	M_isoprenaline_1	M_isoprenaline_2	M_isoprenaline_3	M_isoprenaline_4
(-)-erythro-(2R,3R)-dihydroxybutylamide	7.75297	119.058	1.70458e+06	1071426	1.97909e+06	679090	1.65588e+06	1.36386e+06	1.05976e+06	1.06056e+06	4932.66	18104.7	0	0	13042.4	4007.7	20040.9	15790
(1-Ribosylimidazole)-4-acetate	13.3498	258.085	141942	102065	177492	151620	286746	228726	300074	239410	0	0	0	0	0	0	0	0
(1S,3R,4S)-3,4-Dihydroxycyclohexane-1-carboxylate	13.2477	160.074	155134	128807	151326	157052	186129	163852	173237	156324	62767.3	76481.6	64207.1	63244	66898.7	61937.6	59974.1	57668
(1S,4S)-4-Hydroxy-3-oxocyclohexane-1-carboxylate	12.936	158.058	130830	54739	170665	115669	113997	99013.6	155212	149779	31005.7	35577.8	38448.1	26633.9	38806.9	30611.7	25102.2	35730
(2E)-2-ethylidene-4-hydroxy-5-methyl-3(2H)-furanone	5.16587	140.047	834697	664159	710224	663006	860092	638652	913975	866371	0	0	0	0	0	0	0	0
(2S)-2-Isopropyl-3-oxosuccinate	8.81823	174.053	1.69709e+06	1.34877e+06	1.65629e+06	1.72014e+06	1.75193e+06	1.6237e+06	1.7948e+06	1971825	20424.3	18124.4	20477	17269.5	23312.9	10965.6	16618.2	17451.7
(2S)-2-Isopropylmalate	10.1633	176.068	129376	69385.7	106250	85502.7	75745.9	100371	96312.7	51582.9	24361.9	14184.7	13747.1	11044.7	21503.4	13094.5	10373.4	15075.1
(3R)-hydroxy-N-acetyl-(L)-arginine	13.2037	232.117	3.55546e+06	2.97115e+06	3.88021e+06	3264063	6668387	5.51232e+06	2.87954e+06	4171021	0	0	0	0	0	0	0	0
(3S,4S)-3-Hydroxytetradecane-1,3,4-tricarboxylate	4.61916	346.199	265377	266747	287965	250323	349273	286546	308625	319844	0	0	0	0	0	0	0	0
(3S,5S)-carbapenam	9.25216	155.058	466305	190001	405943	160724	291235	167108	369300	207315	0	0	38951.3	30860.5	38830	0	0	40257
(Ac)2-L-Lys-D-Ala	11.9887	301.164	181269	76078.2	320104	274109	183696	172479	182379	186089	0	0	0	0	0	0	0	0
(R)-2-Ethylmalate	13.8673	162.053	412579	67498.7	403912	613919	85332.6	218888	730585	1140250	411700	357750	340814	303440	353573	451825	402832	406696
(R)-3-((R)-3-Hydroxybutanoyloxy)butanoate	13.0259	190.084	186637	88329.9	154137	198681	187424	187265	203041	231009	22614.2	33590.9	49661.5	32864	35364.4	18555.1	34176.4	34183.9
(R)-3-Hydroxybutanoate	9.47062	104.047	122366	95993.9	147388	111169	168460	138704	81262.1	131702	134505	99898.4	104553	78675.1	105525	87545.8	86826.3	100714
(R)-AMAA	15.3053	172.048	196851	137585	159198	140841	224026	166893	166188	161444	10123.5	17424.5	17898	13736.6	20555.2	19851.9	18245.7	14811
(R)-Lactate	14.3422	90.0316	4.78733e+06	3228980	7448845	5736452	6941328	6.9936e+06	5862351	5.22522e+06	4643240	5.04265e+06	4.54888e+06	4.99582e+06	4882081	5310484	4277950	4.78802e+06
(R)-piperazine-2-carboxylate	12.7195	130.074	0	0	0	0	0	0	0	0	560447	611658	688485	681176	591152	965354	508072	820082
(R)-piperidine-3-carboxylate	11.2625	129.079	146297	98893	214459	103669	227022	98317	157431	127210	216242	200819	183150	167437	209292	178162	200342	172584
(R)-S-Lactoylglutathione	12.6291	379.105	4.94009e+06	1.67239e+06	5976001	4515855	4.22111e+06	3.44163e+06	6.08462e+06	5.83801e+06	0	0	0	0	0	0	0	0
(S)(+)-Allantoin	13.6471	158.044	519200	355550	531231	325991	820958	539403	533085	485161	870320	1.03125e+06	884316	936398	1.00114e+06	873893	909706	934335
(S)-1-Pyrroline-5-carboxylate	14.7801	113.048	2.53413e+06	583126	1.96172e+06	1.45939e+06	3.74039e+06	3.85583e+06	2.42153e+06	2329297	196057	187767	228049	197346	165306	164835	159127	206762
(S)-2-Aceto-2-hydroxybutanoate	7.68101	146.058	1.14768e+06	1.56754e+06	1.81016e+06	2153675	1.68954e+06	2180409	2.04601e+06	2.04355e+06	76823.2	126317	75373.8	58833.2	94670.8	131873	77723.4	71881.5
(S)-2-Acetolactate	14.3766	132.042	433953	478096	433522	515891	532010	527416	550672	486290	695959	804192	649453	802947	745973	812113	586049	652374
(S)-3-Methyl-2-oxopentanoic acid	5.01055	130.063	9025531	8.27421e+06	9724872	7249827	12727284	11175691	8711480	8484289	16050223	16714817	12855745	15673617	18997268	19428704	13490056	15722336
(S)-AMPA	14.3529	186.064	110581	45889.3	282974	201203	119702	81873.5	133146	263443	0	0	0	0	0	0	0	0
(S)-ATPA	14.6485	228.111	0	145009	0	0	206016	181674	0	0	677430	587432	674496	691696	725828	792660	632132	671941
(S)-Lactate	9.62605	90.0316	192281056	132941472	212778000	139501168	225842800	176672224	198050672	172310960	276122016	278149696	306881248	300854848	277713728	289340416	294042336	278696096
(S)-Malate	15.6976	134.022	38789552	29120150	38211544	33313862	50558080	36214592	37767672	38808100	2988797	3047204	3234429	2.9116e+06	3.17298e+06	3.3569e+06	2.94651e+06	3.07893e+06
[FA (11:0/2:0)] Undecanedioic acid	5.00417	216.136	117922	117481	112988	189574	122823	185301	159489	117062	20309.9	24204.2	25234.6	14649.3	26114.9	23516.8	23852	19233.8
[FA (14:0/2:0)] Tetradecanedioic acid	7.63782	258.183	539153	426028	398237	583004	691556	495158	498408	531412	17707.3	11824.3	12364	15949.4	18589.7	18161.3	53249.1	25658.2
[FA (16:4)] hexadecatetraenoic acid	4.26503	248.177	110573	98528	104845	113498	105830	97950.1	53204.1	60814.8	142133	142051	148622	146649	123192	139093	129344	131803
[FA (18:1)] 9Z-octadecenamide	4.30476	281.272	757258	625976	1098468	1.75395e+06	887386	1.55226e+06	1.26227e+06	2.09242e+06	2.35104e+06	2512729	2.3649e+06	4.87687e+06	2.93729e+06	2.05861e+06	3.91476e+06	2.32385e+06
[FA (18:1)] 9Z-octadecenoic acid	3.95722	282.256	12170664	19147236	6498829	14005784	14378785	19442634	19063574	17726768	16932600	17276530	31020454	9792816	25657202	13556107	11874828	17908126
[FA (18:3)] 9Z,12Z,15Z-octadecatrienoic acid	4.03819	278.225	344914	476339	185429	439357	433531	477298	552409	425366	373246	477476	527407	284683	547912	429851	433625	425430
[FA (20:1)] 11Z-eicosenoic acid	3.91317	310.288	260932	499089	131866	363710	381135	545424	433053	480411	424976	469762	741857	269269	626946	331875	360310	485523
[FA (22:1)] 13Z-docosenoic acid	3.86193	338.319	40979.7	216596	54990.8	323042	347379	238117	346937	556103	0	73379.3	50487	158651	0	109802	53469.1	75388.5
[FA (25:0)] pentacosanoic acid	3.80391	382.382	79702.1	184387	41322.2	114950	106273	95407.3	88405.5	82375.2	71443.8	65575.9	75065.7	57058	64609.8	21423.9	30532.4	39682.3
[FA (7:0/2:0)] Heptanedioic acid	7.66394	160.074	3974358	3.48486e+06	4.02508e+06	3.86102e+06	4247397	3.72601e+06	3.73203e+06	3.82301e+06	1.24379e+06	1.25139e+06	1.17829e+06	1.15981e+06	1294007	1.2522e+06	1.32201e+06	1.0263e+06
[FA (8:0)] octanoic acid	7.62788	144.115	523318	391281	451914	584573	620244	442020	444375	533092	572406	513863	535773	644765	580514	511311	625745	552655
[FA amino(14:0)] 2-amino-tetradecanoic acid	4.39002	243.22	124599	120215	294565	575360	116521	1.63015e+06	273354	780394	2.09795e+06	1244470	1.14117e+06	1308238	1.67312e+06	1.44187e+06	1.32641e+06	808905
[FA amino(4:0)] 2-amino-4-cyano-butanoic acid	9.08895	128.059	203644	175058	252098	277961	294050	308632	231635	269537	35439.6	32790.1	26236.6	28190.5	35613.1	31011	29972.7	26173.4
[FA dioxo,hydroxy(4:0/2:0)] 9,15-dioxo-11R-hydroxy-2,3,4,5-tetranor-prostan-1,20-dioic acid	4.43902	328.153	712951	734657	641200	666319	751428	681625	854986	801887	0	0	0	0	0	0	0	0
[FA hydroxy(10:0)] N-(3S-hydroxydecanoyl)-L-serine	4.51593	275.173	2.92979e+06	2611129	2.37257e+06	2.28042e+06	3.05596e+06	2.38221e+06	2.92615e+06	3.1525e+06	0	0	0	0	0	0	0	0
[FA hydroxy(18:1)] 9,10-dihydroxy-12Z-octadecenoic acid	4.25798	314.246	426649	522128	316355	267850	572259	278085	335979	227315	48614	60713.4	63340.2	52876.7	58654.6	49581	33285.1	49483.4
[FA hydroxy(18:2)] 13S-hydroxy-9Z,11E-octadecadienoic acid	4.07347	296.235	537774	890660	239494	564734	527644	699832	842979	809881	267848	374300	451756	276711	408256	237135	282041	346996
[FA methyl(4:1)] 2-methyl-2E-butenoic acid	14.2924	100.052	85028.9	25780.2	52962.6	107981	48487.6	59354.4	93407.1	76929.3	30961.3	57214.7	40921.8	44257.1	74005	63120.6	31379.8	46367.5
[FA methyl,hydroxy,oxo(5:2/4:0)] methyl 4-[2-(2-formyl-vinyl)-3-hydroxy-5-oxo-cyclopentyl]-butanoate	4.56589	254.116	603692	563014	518283	541513	645256	551437	651339	691581	0	0	8897.84	0	0	0	0	0
[FA oxo(5:1/5:0/8:0)] (1S,2S)-3-oxo-2-(2'Z-pentenyl)-cyclopentaneoctanoic acid	4.07827	294.219	277122	373051	182199	268107	225573	298547	288685	263866	245634	188931	152485	0	211353	118984	141161	153260
[FA oxo(8:1)] 5-oxo-7-octenoic acid	5.01778	156.079	1.513e+06	1.28081e+06	1.29489e+06	1.19224e+06	1.26206e+06	1.30168e+06	1.14284e+06	1384809	265740	399862	243221	209835	178937	253058	233705	214200
[FA oxo,amino(6:0)] 3-oxo-5S-amino-hexanoic acid	13.267	145.074	131631	89545.6	118779	100939	141990	115427	117906	115053	283337	335869	325280	260730	301642	331459	270786	288737
[FA trihydroxy(18:1)] 9S,12S,13S-trihydroxy-10E-octadecenoic acid	4.75266	330.241	87534.6	87369.2	82349.9	84381.5	84373.1	101391	119277	103372	24201.9	25212.7	20773.5	20972.1	50655.8	24152.5	27678.6	21153.6
[FA trihydroxy(4:0)] 2,3,4-trihydroxy-butanoic acid	12.251	136.037	3.49701e+06	2.03443e+06	3.98959e+06	3.17373e+06	4.54015e+06	3.66704e+06	4.82394e+06	4423195	6323152	6.16041e+06	6739393	6341125	6.97824e+06	7.03383e+06	6384917	6231189
[LysoPC(14:0)] 1-tetradecanoyl-sn-glycero-3-phosphocholine	5.03781	467.302	2.30871e+06	982993	2.16841e+06	2.25756e+06	2.19246e+06	1.90347e+06	2.47773e+06	2.54322e+06	0	0	0	0	0	0	0	0
[LysoPC(16:2)] 1-hexadecyl-sn-glycero-3-phosphocholine	4.94926	481.353	2464100	893764	3.79911e+06	3.48373e+06	2.41062e+06	2.40349e+06	3172210	7128643	0	0	0	0	0	0	0	0
[PC acety] 1-acetyl-sn-glycero-3-phosphocholine	11.1308	299.113	574908	461798	661732	739151	670790	499508	631173	510937	0	0	0	0	0	0	0	0
[PC acetyl(3:0)] 1-propionyl-2-acetyl-sn-glycero-3-phosphocholine	4.53655	355.139	310955	301218	257280	363668	325291	307250	327619	299507	0	0	0	0	0	0	0	0
[PC diacetyl(2:0)] 2,3-diacetyl-sn-glycero-1-phosphocholine	4.692	341.124	282529	212072	280895	238049	334585	267820	226204	296812	0	0	0	0	0	0	0	0
[PC(16:0)] 1-hexadecanoyl-sn-glycero-3-phosphocholine	7.65806	495.333	3222014	1.51394e+06	3.23824e+06	3812414	4.13688e+06	2794075	4.02763e+06	7854843	0	0	0	0	0	0	0	0
[PC(16:1)] 1-(1Z-hexadecenyl)-sn-glycero-3-phosphocholine	4.96723	479.338	641326	247975	558631	788678	571838	493480	823015	1.30436e+06	0	0	0	0	0	0	0	0
[PC(16:1)] 1-(9E-hexadecenoyl)-sn-glycero-3-phosphocholine	7.63413	493.317	1.95353e+06	1486786	1308153	2.15207e+06	2.61321e+06	1.82258e+06	2.1569e+06	2.94389e+06	0	0	0	0	0	0	0	0
[PI(18:0)] 1-octadecanoyl-sn-glycero-3-phospho-(1'-myo-inositol)	4.35812	600.327	449286	137362	616967	1.04163e+06	522251	470885	673310	1.47868e+06	0	0	0	0	0	0	0	0
[PI(36:0)	3.8292	879.583	169129	1.22163e+06	435458	201600	496204	334130	147425	263460	0	0	0	0	0	0	0	0
[PR] 2E-geraniol	4.5756	154.136	0	0	0	0	0	0	0	0	70376	82070.1	81345.4	61741	118561	120058	62700	41754.9
[PR] Tretinoin/All-Trans Retinoic Acid	4.17204	300.209	364962	317812	37428.7	85940.9	268615	200984	313470	465559	42076.7	83887.8	65446.5	37684.3	48898.7	0	0	0
[PS(16:0)] 1-hexadecanoyl-sn-glycero-3-phosphoserine	4.39928	497.276	114556	0	157783	198102	139421	124385	168112	210854	0	0	0	0	0	0	0	0
[SL (6:0/6:0)] 2,3-di-0-hexanoyl-alpha-glucopyranose	4.50192	376.21	215543	221309	143462	163082	175868	177740	190242	222022	0	0	0	0	0	0	0	0
[SP (14:0)] 1-deoxy-tetradecasphinganine	7.62049	229.241	201029	187603	288327	181307	263365	179422	224076	223832	770565	919640	688672	829734	808915	776684	921664	875802
[SP dimethyl,amino(18:0/2:0)] 2S-dimethylaminooctadecane-1,3R-diol	5.05622	329.329	46854.9	109632	0	59137.2	517609	0	0	0	54817.2	139349	22543.3	700754	57090.7	11610.2	311340	36630.9
[SP] Sphing-4-enine-1-phosphate	5.17706	379.249	683892	192049	788771	933026	799050	711360	965474	1.07473e+06	0	0	0	0	0	0	0	0
[ST hydrox] 3alpha,7alpha-Dihydroxy-5beta-cholan-24-oic Acid	4.92699	392.293	417909	1.62917e+06	475193	628264	368310	517135	579156	337726	96621.1	163328	88442	73530.3	206383	83176.2	74480.9	116695
[ST hydrox] N-(3alpha,7alpha-dihydroxy-5beta-cholan-24-oyl)-taurine	4.48672	499.297	87346.2	42937.1	96248.8	81847.8	162546	162819	77150.3	128723	145800	202909	138946	146804	183914	140731	175831	159882
1(2H)-Isoquinolinone	10.9087	145.053	76869	76629.6	104480	83895.4	140407	136331	93787.4	101759	120656	159077	159953	125770	181693	119912	123225	158490
1-(3,4-dimethoxylphenyl)ethane-1,2-diol	5.09874	198.089	2.25397e+06	2.3448e+06	2529187	2.6264e+06	2.57354e+06	2.42641e+06	2.40071e+06	2.72049e+06	24884.9	23943.1	72337.1	21073.5	48928.7	70432.2	65148.1	44087.3
1-(5'-Phosphoribosyl)-5-amino-4-imidazolecarboxamide	15.0766	338.063	580639	513765	550449	460635	308254	453782	313826	298086	0	0	0	0	0	0	0	0
1-(beta-D-Ribofuranosyl)-1,4-dihydronicotinamide	9.2832	256.106	1.31727e+06	914971	1.41694e+06	1.16854e+06	1.95013e+06	1.14372e+06	1.61559e+06	1.53425e+06	139553	131518	179448	144880	140849	113036	117134	139488
1,2-Dihydroxy-5-(methylthio)pent-1-en-3-one	12.6527	162.035	128009	0	143526	82770.1	82894.5	104473	106236	111225	0	0	0	0	0	0	0	0
1,3,5-trimethoxybenzene	4.82017	168.079	3.32598e+06	2595278	2.86149e+06	2.70813e+06	2800746	2.89265e+06	2840487	3.1984e+06	249493	126663	299853	188825	130016	231812	316261	118758
1,4-Lactone	14.3949	86.0367	0	0	42764.3	0	0	68102.7	45817.5	58696	216264	253259	213580	247117	242353	255770	181849	208383
1,6,6-Trimethyl-2,7-dioxabicyclo[3.2.2]nonan-3-one	4.81511	184.11	549236	683482	682421	848604	750050	704671	736876	717618	115012	112456	78625.5	82675.7	140883	144192	116781	97353.1
1,6-diaminohexane	13.4291	116.131	362146	619723	373135	2.78006e+06	579922	9925598	20815882	1.17153e+06	221525	254019	216879	316469	589916	223650	217525	150816
1,9S,11R,15S-tetrahydroxy-13E-prostaene	4.04943	342.277	176953	138018	161893	166698	158019	168720	159086	169783	33406.8	6630.82	8224.65	0	7798.05	25297.8	21256	27048
10-hydroxygeraniol	4.31835	170.131	138245	138128	166818	210732	151784	178006	222778	207780	61524.1	45919.3	52034.3	44139.9	58775	56757.6	43898.2	44962
10-oxogeranial	4.98712	166.099	718506	798068	894016	828441	968407	1043104	645811	808037	99297.6	118054	97601.4	72105	110222	110057	107822	129160
13-14-DihydroPGF-1a	4.25053	358.272	331444	360715	153418	94071.9	407320	104336	160269	141467	0	0	0	0	0	0	0	0
1-4-beta-D-Glucan	3.88896	536.159	271673	418855	190979	312690	258365	364455	286184	563532	103208984	98454760	87038312	72261040	85607496	72905392	70189096	66750448
1-deoxyxylonojirimycin	16.2954	133.074	459331	329213	643702	293829	461631	398759	585074	383572	21053	0	0	0	0	0	0	0
1-methylguanosine	10.0843	297.107	340949	292115	388261	273486	650226	343282	427050	450706	216381	196814	272384	171316	205784	230989	254891	224778
1-O-Methyl-myo-inositol	13.6212	194.079	30580.9	58521.6	23164.7	75174.5	47475.6	48842.1	61929.8	52557.2	86030.7	100801	113291	54959.7	114350	78420	76869.9	59605.2
1-Pyrroline-2-carboxylate	7.76709	113.048	964046	263934	1.07721e+06	887169	462306	788177	1.01936e+06	1.20157e+06	25795.3	27051	25165.7	47033	23622.3	34530	26831.1	23895.2
2 -(Butylamido)-4-hydroxybutanoic acid	7.78923	189.1	1.05321e+06	1035633	1.19502e+06	1.42585e+06	1.10414e+06	1.53922e+06	1.12681e+06	1414859	234583	216643	232952	226886	227248	236104	227592	237515
2-(5,6-dihydroxy-1H-indol-2-yl)-1H-indole-5,6-diol	12.2328	296.08	0	0	0	0	0	0	0	0	156279	197529	186783	195031	185781	168241	221438	190982
2-(Acetamidomethylene)succinate	13.2547	187.048	375570	177174	387095	339136	400085	357562	444363	517282	0	0	0	0	0	0	0	0
2(alpha-D-Mannosyl)-D-glycerate	14.724	268.08	1.09682e+06	676118	748553	698944	1.09882e+06	1.15155e+06	1.02954e+06	893076	61414.1	41391.7	62475.6	65859.1	64890.1	38721.6	56394.5	73562.4
2-(alpha-Hydroxyethyl)thiamine diphosphate	14.2397	468.064	467247	120895	538963	364549	282509	460428	520692	638192	0	0	0	0	0	0	0	0
2-(Formamido)-N1-(5'-phosphoribosyl)acetamidine	16.1502	313.068	238940	240819	342392	180900	63691.1	128843	61584.7	72024.7	0	0	0	0	0	0	0	0
2-(Hydroxymethyl)-3-(acetamidomethylene)succinate	19.4841	217.059	185096	126235	185648	134872	225773	148519	180037	144317	0	0	0	0	0	0	0	0
2,3,5-Trihydroxytoluene	7.17459	140.047	82385.5	97749.3	86924.5	75351.1	111155	91094.1	118461	121397	10829	6526.83	5979.59	6726.81	5754.69	5769.69	4518.1	5141.07
2',3'-Cyclic AMP	13.5663	329.053	319526	110041	288034	218989	238704	178844	353707	258220	0	0	0	0	0	0	0	0
2',3'-Cyclic UMP	10.4793	306.026	103695	104992	145755	59748.5	164322	115705	158608	89313.3	11324.9	19198.6	10020.2	11076.2	20305.6	8938.24	23549.1	10151.5
2,3-Dihydroxycyclopentaneundecanoic acid	4.97197	286.215	394641	353555	556137	476026	471318	491613	529944	487469	10194.1	9244.55	17969.8	0	25402.8	10602.2	7699.16	10000.2
2,3-Dimethylmaleate	14.3263	144.042	1.45064e+06	1614471	1.74463e+06	1.75298e+06	1.99872e+06	1675171	1.76275e+06	1.91459e+06	321852	363972	404779	212401	427008	266894	366136	314720
2,5-Dioxopentanoate	11.2019	130.027	407881	456334	370854	378290	512044	478469	421936	491702	33243.5	35052.1	35162	31208.3	36774.7	30431.8	31128.1	30581.2
2,6-Dimethoxybenzoquinone	5.1156	168.042	1.3848e+06	1.20223e+06	1.35979e+06	1.51848e+06	1.36422e+06	1.38068e+06	1.69568e+06	1.57494e+06	0	0	0	0	0	0	0	0
2,6-Dimethoxyphenol	4.63928	154.063	193456	212127	180403	173353	182136	180332	206812	248194	14428	0	10935	6934.04	8640.08	0	15538.2	5842.45
2,7-Anhydro-alpha-N-acetylneuraminic acid	13.3643	291.096	863096	403037	940992	645058	940081	630281	1056201	973258	82365.6	100216	112932	106074	111186	101573	93994.8	100095
2-6-10-Trimethylundecanoicacid	4.05447	228.209	12283382	11555720	6476950	16590310	9862415	12884435	12321624	13670839	5.75176e+06	6588263	7.30269e+06	4977877	8417625	5402632	6.174e+06	6.37684e+06
2-acetamidoglucal	14.8748	203.08	1.1762e+06	791194	1.53228e+06	1.13503e+06	1617563	1.23274e+06	1.2674e+06	1.58875e+06	0	0	0	0	0	0	0	0
2-Acetolactate	7.67505	132.042	392733	231465	370581	344246	327220	284605	446855	393487	36222	26266.7	24494.9	19686.8	27438.2	23196.6	21886.1	22722.6
2-Aminobutan-4-olide	8.3737	101.048	40724.4	33620.7	50316.4	61837.1	80766.9	84221.7	44707.1	48732.8	26573.4	30517.9	34345.9	27073.7	264197	336615	252232	252899
2-Butenoate	14.7705	86.0367	72498.8	59500.7	81475.4	52033.9	97990.3	157721	58216.9	71811.8	244588	289965	230627	234710	242353	260354	181849	235893
2-Butyne-1,4-diol	17.6897	86.0367	155535	209684	220155	209251	279934	222631	267397	243153	22173.9	18580	19981.7	23169.1	24914.6	24511.4	23841.9	19819.4
2-chlorohexadecanol	7.71109	276.222	3.91615e+06	3.482e+06	3.03369e+06	3.01332e+06	3.2368e+06	2278829	3.03942e+06	3660246	4.04464e+06	4928474	3.6615e+06	4.04185e+06	4.19368e+06	3671332	3.86957e+06	3.41932e+06
2'-Deoxy-5-hydroxymethylcytidine-5'-diphosphate	15.3228	417.034	155286	104804	185708	130990	152937	126624	184974	162670	0	0	0	0	0	0	0	0
2-Ethylhexyl phthalate	4.04285	278.152	7.52763e+06	5.81967e+06	8689822	7878628	11676584	9533452	12472175	11221769	942696	981271	1.19178e+06	992309	1.07723e+06	1.14498e+06	876194	966130
2-Furoate	7.73919	112.016	629924	452034	489574	671063	585352	481171	533759	512369	28392.9	21388.1	18359.2	25550.8	34150.5	25136.3	18985.1	22136.2
2-Hydroxy-2,4-pentadienoate	14.7117	114.032	453456	486409	480606	383808	873062	873365	597697	554322	2.79218e+06	3.37043e+06	2.31503e+06	2.81449e+06	3.08401e+06	3.42672e+06	2.38838e+06	2752679
2-Hydroxy-6-oxonona-2,4-diene-1,9-dioate	13.2315	214.048	108166	60448.5	112110	96673.7	135462	90769.1	98548.6	127545	0	0	0	0	0	0	0	0
2-Hydroxyadenine	9.6515	151.049	232753	132781	236229	142461	311718	177583	214869	194577	148883	201934	166648	135653	213504	167683	215106	209533
2'-Hydroxydihydrodaidzein	14.8239	272.068	208510	222655	390243	451786	264899	436405	488505	486576	0	0	0	0	0	0	0	0
2-Hydroxyethanesulfonate	10.5827	125.999	147376	101734	132630	106335	161118	154914	110858	106861	104819	161044	125708	111542	137792	125325	123636	123763
2-Hydroxymalonate	16.7359	120.006	80492.9	111899	73480.1	68641.7	80497.6	88584.6	75127.2	57925.4	28545.1	32322.4	32917.7	28286.8	28484.6	23780.5	27949	33277.2
2-isocapryloyl-3R-hydroxymethyl-γ-butyrolactone	4.65156	242.152	628268	525034	605626	587313	664270	599272	616147	827206	29586.2	27232	47191	46774.6	30870.3	37738.6	51550.2	27592.2
2-Isopropylmaleate	7.66636	158.058	2.61386e+06	2584280	2.73897e+06	3.00858e+06	3.16758e+06	2.62387e+06	2.77229e+06	2.78769e+06	230486	196856	173600	238231	220401	240159	294472	117671
2-Methylbutyroylcarnitine	8.22049	245.163	126619	107741	174136	121567	162160	144265	120216	160713	170169	171585	133518	122488	126233	142149	133040	131876
2-nitro-1-propanol	10.6454	105.043	2.0845e+06	1.3478e+06	2.44658e+06	1.62782e+06	2.03466e+06	1.71301e+06	2.26138e+06	1821679	58976.9	37849.3	87384.1	41274	54547.9	50599.1	61809.7	62603.6
2-Octenedioicacid	7.65658	172.074	1.34224e+06	1.49084e+06	1.54552e+06	1.78679e+06	2.01066e+06	1.39425e+06	1.77782e+06	1.69505e+06	131823	211309	89980.8	80425	192619	94524	161989	141923
2'-O-Methyladenosine	14.1933	281.112	922958	512321	1.09436e+06	783659	1102537	774021	1.11597e+06	1.17801e+06	284593	250982	246726	203083	270889	199377	265119	277425
2-Oxoadipate	7.72686	160.037	596682	512732	603215	499711	651877	583357	533830	668932	10935.9	11090.4	8984.54	8617.21	11725	10332.5	9327.16	10550.2
2-oxobut-3-enanoate	7.59164	100.016	358172	174870	357646	329275	384689	374606	526172	436624	13754.2	10494.9	6711.85	5609.21	11432	7025.26	11288.8	6002.66
2-Oxoglutaramate	8.48282	145.038	172453	57678.5	150190	113970	163975	114594	125319	98781.2	20039.3	27654.4	24470.1	23657.7	19447.5	19182.6	23338	24899.4
2-Oxohept-3-enedioate	10.5889	172.037	96816.3	69194.4	106083	90126.1	93021.9	108666	98230.3	105967	0	0	0	0	0	0	0	0
2-oxosuberate	7.69725	188.068	2185413	1665994	1.59307e+06	1.79781e+06	2.14045e+06	1.95908e+06	1.75857e+06	1.81726e+06	25119.2	25543.3	25071.9	21770.9	29228.2	21610.7	98721.4	28754
2-Phenyl-1,3-propanediol monocarbamate	6.54926	195.09	102032	42900.1	120727	96879.1	100621	102671	118329	99365.5	7161.95	6209.7	5303.16	6047.04	7052.53	5933.8	6084.08	6167.57
2-Phosphoglycolate	16.7062	155.982	47588.2	65106.6	47593.7	46988.1	52067.9	53172.8	46265.9	39439.1	0	0	0	0	0	0	0	0
2-S-Glutathionyl acetate	12.0204	365.089	10040688	4.24567e+06	14857082	15812460	12108673	10973559	11114556	11698759	0	0	0	0	0	0	0	0
2S-Hydroxy-2-isopropylbutano-3S-lactone	4.43899	144.079	318109	305566	227212	205422	262207	220596	280213	282854	84594.4	55541.2	56144.8	55856.1	66318.6	67256	55486.4	53797.9
3,4-Dehydrothiomorpholine-3-carboxylate	7.80446	145.02	267445	405593	209281	139019	281054	306480	241461	130714	466191	440642	871928	577416	321152	468674	379036	732140
3,4-Dihydro-2H-Pyrrole-2-carboxylate	9.03506	113.048	685660	461735	623881	486760	656530	544054	684182	644354	154870	156781	127789	145801	129336	137423	148888	115695
3,4-Dihydroxyphenylethyleneglycol	7.72415	170.058	2.05652e+06	1.44303e+06	1.63284e+06	2.26182e+06	1.39903e+06	1.72571e+06	2.07298e+06	2007068	0	0	0	12108.5	6113.73	0	0	0
3,5,7-Trimethyl-2E,4E,6E,8E-undecatetraene	4.30008	190.172	42279312	47313728	47782056	28015090	57132112	11467070	33797144	15571008	5070228	1.73573e+06	1.92225e+06	2.03657e+06	3.69101e+06	1.73032e+06	2.18375e+06	837557
3,5/4-Trihydroxycyclohexa-1,2-dione	9.80703	160.037	300970	206712	275365	260076	318230	310348	318476	345400	0	11792.2	0	0	10831.6	0	0	0
3',5'-Cyclic AMP	9.60416	329.053	689689	320345	644249	489719	863643	592751	887184	603959	0	0	0	0	0	0	0	0
3',5'-Cyclic CMP	12.8428	305.041	363949	527687	783971	252842	1.03856e+06	538531	697817	371122	0	0	0	0	0	0	0	0
3,5-dihydro-5-methylidene-4H-imidazol-4-one	13.6973	196.096	0	0	0	0	0	0	0	0	143364	181500	169022	223292	163435	207076	159023	223850
3,6-Nonadienal	4.58596	138.104	428594	380322	355532	340443	357627	356008	345774	383506	46181.9	77386	67601.6	38714.8	87442.1	69648.7	46518.4	74929.6
3-Acetyldihydro-2(3H)-furanone	4.23516	128.047	389160	441094	307850	365123	377774	382589	453705	431813	100921	131572	31184.7	105391	105638	63251.3	52583.2	132380
3-Amino-2-piperidone	10.8179	114.079	94530.6	58326.1	109324	103554	197886	168651	118004	130684	96948.6	119662	97522.9	81849.6	123809	104678	90941.7	110099
3-amino-isobutanoic acid	5.33742	103.063	426225	364718	395862	379287	335612	330750	347247	323945	325344	332871	292235	289182	438061	297378	354291	354431
3-Butylidene-7-hydroxyphthalide	4.28673	204.079	244834	134788	288497	276843	406230	388513	257190	395884	107978	79577.2	80552.9	96052.1	106122	101457	75695.8	77275.3
3-Butynoate	13.5853	84.0212	291437	224912	367573	235700	453801	322181	292291	291378	1.31252e+06	1360505	1.06402e+06	1.3332e+06	1354372	1.41174e+06	1.17813e+06	1.51377e+06
3'-dAMP	13.2756	331.068	169850	49866.8	99503.3	76207.6	169778	96417.3	225834	188815	0	0	0	0	0	0	0	0
3-Dehydroquinate	10.6462	190.048	0	0	0	23475.2	32796.7	26881.6	0	0	185022	165843	166176	151850	191217	161253	233387	175166
3-Dehydroteasterone	3.95156	446.34	252629	258230	257733	273903	300895	346647	159501	258309	125845	432747	265842	97268.9	192967	45141.1	82987.3	1.06457e+06
3-Dehydroxycarnitine	9.92561	145.11	121207	109629	122747	77333.7	190806	148887	101959	103335	193636	239959	214924	220540	224892	222751	225851	238524
3-deoxy-D-galactose	11.3529	166.084	85952.9	72632.9	82362.7	70444.1	104180	109462	81490.3	72432.5	183557	184104	181431	166315	185290	181917	191485	172297
3-Ethylmalate	14.2317	162.053	3078023	1.16305e+06	3.17486e+06	3880022	2.78529e+06	2.64806e+06	3822082	4.12672e+06	2.0554e+06	2.36435e+06	1907553	2150115	2.22263e+06	2.33141e+06	1.74185e+06	2.05986e+06
3-Hexenal	7.66549	98.0732	1.87553e+06	1.90856e+06	2.0506e+06	1.52104e+06	1983187	1.58923e+06	1.9689e+06	1.92938e+06	4181.85	5171.46	4734.29	5337.48	6543.07	5864.7	5385.54	5752.62
3Hydroxycoumarin	5.61804	162.032	199597	115756	189846	210551	154949	112442	184454	370357	5603.98	6506.97	6829.15	5980.4	8109.71	7555.64	6796.91	6927.28
3-Hydroxy-N6,N6,N6-trimethyl-L-lysine	19.7794	204.147	231017	184066	263028	208921	336006	239275	295265	247778	0	0	0	0	0	0	0	0
3-Hydroxysebacicacid	7.67932	218.116	1.48921e+06	1307842	1.65974e+06	1.32775e+06	1.8184e+06	1.47848e+06	1.56698e+06	1441237	44479.7	11692	14859.9	13710.9	23845.5	16381.7	16330.4	17142.2
3-Hydroxytetradecanedioicacid	5.11734	274.178	197504	182312	222874	250646	251277	217100	272724	279341	0	16842.5	15588.1	0	0	0	17055.1	0
3-Indoleglycolaldehyde	4.91451	175.063	0	0	0	0	0	0	0	0	372000	381948	483776	338871	373786	316333	273453	370523
3-Isopropylcatechol	7.69514	152.084	187682	215548	291414	341551	210836	412650	193047	335270	23583.3	0	0	0	0	0	0	0
3-Methoxy-4-hydroxyphenylacetaldehyde	4.63617	166.063	178663	174930	195049	154514	202634	165219	168973	190823	81204.7	83576.2	131690	83034.6	128763	80134.4	68499.6	87377.9
3-Methoxy-4-hydroxyphenylethyleneglycol	7.67093	184.074	1.85255e+06	968228	1.57132e+06	1.19905e+06	1.28181e+06	1.38268e+06	1.44212e+06	1.80442e+06	21232.8	63405.5	6347.37	5425.31	15425.9	10032.6	17426.1	8830.78
3-methylarginine	22.2029	188.127	61693.1	72471.9	76007.3	55830.9	98504.8	94073.1	63056.6	61047.1	117309	91997.3	113976	98031.6	104078	102228	100550	101685
3-Methyleneoxindole	10.1632	145.053	199893	130065	161680	169586	180406	161595	132419	136552	38812.3	54147.6	52887.3	35409.7	50047.5	33588.5	47157.3	46593.9
3-Methylguanine	9.88486	165.065	461478	447426	834077	428453	849496	650133	685888	573680	649192	670058	728900	596054	855611	727871	983747	780655
3-nitro-2-butanol	9.54898	119.058	902769	417372	917893	611522	999128	722148	870848	656890	26580.8	28176	31163.7	28169.7	36035.4	30899.5	35867.3	39201.7
3-nitro-2-pentanol	7.88994	133.074	2.98485e+06	1.09594e+06	2.82809e+06	1.66175e+06	2.00634e+06	1.62052e+06	3.17603e+06	2676172	21207	31608	64064.6	12755.5	31370.1	34244.8	0	28372.2
3-oxopimelic acid	5.21559	174.053	214460	224877	219010	247309	253157	183217	276230	243066	20696.3	19115.4	19516.4	17617.4	17644.5	13909.8	19037.3	17999.2
3-Oxopropanoate	14.4216	88.016	89957	138427	106318	195272	95533.8	174187	134798	130479	257305	276447	216051	239599	262431	273721	236760	235441
3'-Phosphoadenylylselenate	16.113	555.937	0	0	0	0	0	0	0	0	425058	391898	417552	419809	378899	411559	370006	365630
3-Phospho-D-glycerate	16.6892	185.993	8944797	13271882	7.01062e+06	4882133	6902281	5.03741e+06	6.29974e+06	5.33052e+06	34447.4	33736.8	30448.3	32545.7	34956.5	41698.4	43487.5	33946.3
3-Phosphonopyruvate	13.252	167.982	461200	47535.9	783123	779971	1.0527e+06	733361	1.04448e+06	1315454	0	0	0	0	0	0	0	0
3'-UMP	17.4025	324.036	121648	115735	169602	126299	148097	139535	162243	137167	0	0	0	0	0	0	0	0
3-Ureidopropionate	11.8616	132.053	94476	102267	137816	94345.2	163084	127639	121982	104656	976740	1.09812e+06	985965	1.06354e+06	1.08972e+06	1.10335e+06	1.04081e+06	1.06079e+06
4-(Trimethylammonio)but-2-enoate	10.816	143.095	70516.2	81139.9	74169.5	88157.8	81444.4	63248.4	88582	55124.1	73776.4	86931.6	86699.7	108492	94708.2	89504.5	81562.2	90009.4
4,8-Dimethyl-1,3E,7-nonatriene	4.35268	150.141	403601	641677	695176	871039	824815	694748	726308	627349	414524	252280	265900	209050	418823	190535	248454	35998.2
4-Amino-2-methyl-5-phosphomethylpyrimidine	14.5164	219.04	1.65914e+06	1.75636e+06	1.39237e+06	1.12375e+06	2.77606e+06	2.95831e+06	1.44036e+06	994236	243552	264772	232497	201216	199029	259274	202698	217843
4-Hexyloxyphenol	4.45137	194.131	454921	684785	412190	612301	519294	387465	551154	572758	40794	127642	162942	96601.6	127021	194232	80680.6	90508.2
4-Hydroxy-2-butynal	14.3167	84.0211	228320	454165	429030	206888	453801	472096	148169	148366	590550	624374	454689	620964	610228	553726	451961	547876
4-hydroxy-5-methyl-2-propyl-3(2H)-furanone	4.43153	156.079	892539	1.01864e+06	663900	687116	812412	745332	940048	1.0036e+06	32899.1	77500.6	37635.1	27050.3	32225.4	34845.5	27969.4	49353.9
4-hydroxycoumarin	6.40956	162.032	80893.8	45924.1	72698	90783.6	107225	70386	90838.7	134342	5593.56	5011.12	4290.74	5278.5	6620.74	5133.91	5118.79	4143.18
4-Hydroxyphenylglyoxylate	16.8792	166.027	615188	572388	582338	571463	616814	558068	596656	606742	661668	627133	464349	612604	639337	680875	622133	638476
4-Imidazolone-5-acetate	13.4782	142.038	245314	106741	220216	240763	304842	308156	250424	286761	0	0	0	0	0	0	0	0
4-methoxy-3-indolylmethyl-glucosinolate	15.3479	478.071	0	0	0	0	0	0	0	0	518397	501051	510889	520385	486283	506790	508679	441422
4-Methyl-2-oxopentanoate	7.67183	130.063	8.10204e+06	8.06906e+06	8045700	9243180	10548587	8697939	7.79162e+06	8911789	231876	308771	353640	296986	225957	275531	233036	266368
4-Methylaminobutyrate	10.2991	117.079	1.31327e+06	1358181	1.43697e+06	1.28342e+06	1.35811e+06	1.43901e+06	1.58088e+06	1.28295e+06	1.5467e+06	1533339	1.38164e+06	1.30148e+06	1401828	1.34114e+06	1.3339e+06	1453610
4-Methylpentanal	4.32278	100.089	733367	803737	766544	446107	1046525	653785	587044	491739	404526	224296	217960	249386	283079	199793	212166	125707
4-Nitroaniline	7.68242	138.043	171289	397574	240074	319659	382843	404938	219491	300272	210592	391561	431668	313080	847336	365715	293491	265012
4-oxo-4-(3-pyridyl)-butanoate	8.30361	179.058	4.56772e+06	4160500	4.98988e+06	3.49832e+06	6106083	4931330	4.26331e+06	4.02448e+06	6.81974e+06	7465313	7068346	6698317	7.21445e+06	7011884	6593611	6.90019e+06
4-Oxocyclohexanecarboxylate	7.71239	142.063	961198	521397	973482	790121	411165	761584	341929	893257	251970	146408	208452	260876	143648	147746	209960	85232.6
4-Phospho-D-erythronate	17.0069	216.004	698769	453407	912987	529673	781400	607330	771027	634728	0	0	0	0	0	0	0	0
4-Pyridoxate	4.92342	183.053	66982.5	65842.1	68758.3	26476.9	84613.4	92042.1	65572	38016.3	160765	173766	183408	155068	168714	154786	140838	142307
4-Pyridoxolactone	5.32962	165.043	397996	378412	367800	396024	354668	429164	358949	362623	384304	431008	447775	387360	425025	456111	430624	437686
4-Trimethylammoniobutanoate	13.4053	145.11	3598654	1993695	3.54652e+06	2.90445e+06	4.50887e+06	3.10466e+06	3.85449e+06	3.58491e+06	255706	341570	220244	362200	366673	263172	250138	262486
5,6-Dihydrothymine	12.3492	128.059	16898.6	19967.7	11718.8	11989.3	21445.8	14386.8	12941.2	11830.9	124527	81654.3	100704	100633	102425	93712.1	105251	65127.4
5,6-Dihydroxy-3-methyl-2-oxo-1,2-dihydroquinoline	10.4378	191.058	376483	274102	316627	337887	361177	316467	231875	323594	242057	267474	269944	209161	311835	178861	249413	249052
5,8,13,13a-Tetrahydrocolumbamine	11.3053	341.163	213642	168906	174430	180462	155726	268154	161779	166751	195790	333507	176836	229653	237614	176230	270191	258593
5-6-Dihydrouridine	10.1107	246.085	310995	191210	336876	284530	430222	320485	345476	307428	88192.2	135108	127485	95339.7	145863	85921.7	113829	121638
5-Acetamidopentanoate	7.65991	159.09	1.27029e+06	864960	1.16165e+06	1.05984e+06	2.05353e+06	1.36274e+06	1.20241e+06	948906	141107	204198	372311	257301	134204	141868	252263	245694
5-Aminolevulinate	13.1481	131.058	12233.2	25356	24187.6	18849.5	36442	19055.9	22926	18974.4	157428	300564	206555	221738	230689	283840	200641	259348
5-Aminopentanoate	15.2712	117.079	1.88674e+06	1.69623e+06	1.71328e+06	1.64579e+06	2.23254e+06	1.22438e+06	2.24758e+06	1.97718e+06	1.55761e+06	1.37167e+06	1.36588e+06	1.31717e+06	1235869	1508663	1185314	1.37184e+06
5-Ethyl-7-methyl-3E,5E,7E-undecatriene	4.26276	192.188	417256	292747	492711	327100	508987	109026	293304	157404	0	0	0	0	0	0	0	0
5-Guanidino-2-oxopentanoate	14.3715	173.08	412894	170148	522200	495005	257140	239572	352137	441139	562982	811023	807308	868596	721429	1.03686e+06	672186	842926
5-guanidino-3-methyl-2-oxo-pentanoate	13.9163	187.096	0	0	0	0	0	0	0	0	1.46681e+06	2057338	1.90986e+06	2176091	1.73583e+06	2.70218e+06	1631714	2.29344e+06
5-Hydroxyconiferaldehyde	5.00553	194.058	107482	171252	131585	142408	195138	156112	137241	163221	118337	108703	117415	120754	139776	121534	113617	118850
5-Hydroxyectoine	10.7184	158.069	0	0	0	0	33872.2	25192.5	0	0	80190.3	92518.1	68062.1	68822.8	80299.7	99497.4	108919	100164
5-Hydroxyferulate	7.66471	210.053	3.2329e+06	4970391	2.85932e+06	2558558	3.3301e+06	2.94753e+06	2.31702e+06	2.23994e+06	91861.1	133844	79584.6	76288.4	91875.1	77635.5	84772.1	117737
5-Hydroxypentanoate	7.67246	118.063	1.24426e+06	1.07329e+06	1.21459e+06	1.02854e+06	1.84028e+06	1.57054e+06	1.30023e+06	1.09797e+06	1.12186e+06	1.0513e+06	1.15041e+06	886183	1.04579e+06	1.18673e+06	1.15053e+06	1.01022e+06
5-Hydroxytryptophan	10.0432	220.085	293806	217351	312626	228092	291606	250634	263875	222754	193316	246999	178004	216570	195341	182859	220744	217819
5-Hydroxytryptophol	11.8948	177.079	199335	127601	250758	177379	291165	180992	267140	176797	23066.1	20676.8	62956.5	47878.8	0	21980.6	37457	23535.7
5-Methyl-2-furaldehyde	5.0721	110.037	868566	659190	777132	773255	780898	938983	767639	915653	65642.8	99770.4	102273	143747	99220.8	88890	77947.5	130980
5'-Methylthioadenosine	7.70692	297.089	11086383	5159102	13761094	9556917	9254007	8.12472e+06	13863614	14540024	560452	641111	909849	757006	554366	715957	967042	937974
5'-methylthioformycin	16.3936	297.089	916731	643457	1.20392e+06	723221	957583	726166	966993	799921	0	0	0	0	0	0	0	0
5-Oxoproline	10.2247	129.043	18450800	13257875	18710332	11838234	20893008	24101442	16351285	16989754	38990012	48455184	41640480	38709984	45327120	42121984	40982048	46496208
5-Phenyl-1,3-oxazinane-2,4-dione	4.8522	191.058	281847	254934	348872	361036	450704	445548	409296	387592	428519	373056	476946	359177	384842	327526	299350	362791
5'-Phosphoribosylglycinamide	16.4186	286.057	412617	466840	394439	492281	314976	286186	170198	234224	0	0	0	0	0	0	0	0
5'-Phosphoribosyl-N-formylglycinamide	15.083	314.052	194358	150520	212070	126411	42066.9	64084.9	43544.8	113035	0	0	0	0	0	0	0	0
5-Pyridoxolactone	15.4747	165.043	199551	181484	181514	176778	215969	185956	195677	183184	210199	240250	191268	193842	215070	211696	197118	215738
5-Valerolactone	7.83646	100.052	374111	309771	315221	299450	407464	339824	339256	329774	17498	21108	22351.7	18048.4	26577.9	19931.2	19653.8	19400.6
6-Acetamido-2-oxohexanoate	12.1468	187.085	95073.1	172852	130496	92027.9	216086	136408	86614.3	50403.3	5023.4	11458.5	9038.98	24478.6	13131.7	8207.59	9973.54	12566.9
6-Acetyl-D-glucose	14.1866	222.074	332614	22572.6	404265	288820	306992	203108	504729	504584	22708.4	31003.7	33365.8	39350.2	27759.8	34287.2	35909.5	29840.3
6-Amino-2-oxohexanoate	9.19335	145.074	165087	187068	268198	179820	232848	229041	148642	148218	306097	383946	307288	301880	297819	361583	325754	314204
6-Methylpretetramide	12.0218	365.09	4.16267e+06	1.9435e+06	5.94321e+06	6.39501e+06	4.97642e+06	4.90407e+06	4.71923e+06	4.94468e+06	0	0	0	0	0	0	0	0
6-Phospho-D-gluconate	17.3838	276.025	1.50034e+06	1.06821e+06	1.8817e+06	2.92888e+06	2.82314e+06	2673539	1.80972e+06	2286748	7231.58	0	5256.48	0	0	0	0	0
7,8-benzoflavone	5.01893	272.083	394304	378121	324224	176474	367790	259289	440866	358781	48604.9	57860.5	53170.5	47935.9	48906.5	44707.7	53854.4	49441.4
7,8-diketopelargonate	4.43774	186.089	405293	443895	340533	386349	333276	344269	393596	438037	33801.8	29055.4	25927.8	34158.2	26746.8	39001.7	39668.7	29509
7,8-H2pterin-6-ylmethyl-l-(4-aminophenyl)-1-deoxy-D-ribitol 5'-phosphate	14.5132	482.132	694180	380403	616404	638822	781383	626996	787772	605558	0	0	0	0	0	0	0	0
7E,9E,11-Dodecatrienyl acetate	4.9573	222.162	140429	102525	166684	137290	152075	175784	174041	154516	116097	114180	126686	95599.4	153938	128076	132071	99836.2
7-Methyl-2-hydroxy-6-oxoocta-2,4-dienoate	5.13052	184.074	4.05495e+06	3.17052e+06	4.12664e+06	3.88377e+06	4717635	4.18936e+06	4.66081e+06	5.43827e+06	0	25115.7	49617.6	13151.3	0	15702.6	14604.7	15069.8
7-Methyladenine	14.0374	149.07	117193	51015	110379	80884.9	128163	86559.3	124029	120830	0	0	0	0	0	0	0	0
7-Methylguanine	12.6847	165.065	727969	692752	572240	296878	682141	451664	659085	510565	0	0	0	0	0	0	0	0
7-Prenyloxy-3',4'-dimethoxyisoflavone	4.32563	366.146	363589	375797	289231	330508	414184	365157	439472	415737	0	0	0	0	0	0	0	0
8-Amino-7-oxononanoate	7.67793	187.121	3.34032e+06	5485548	3.86118e+06	3.56018e+06	4276936	4.12261e+06	3639218	3.58741e+06	750505	950829	832082	639108	931420	732324	601519	791219
8-Epiiridodial glucoside	7.62106	330.168	205054	285968	277794	287084	334674	300462	214707	376869	0	0	0	0	0	0	0	0
8-Hydroxyadenine	12.6181	151.049	143546	95436.2	116771	40663.9	194883	105388	190320	149181	0	0	0	0	0	0	0	0
8-Hydroxyguanosine	11.225	299.087	96846.9	86940.3	115856	45126	180477	108823	81230.4	55729.2	0	0	0	0	0	0	0	0
9-methylthiononylhydroximoyl-cysteinylglycine	13.0901	379.159	582623	275362	443590	325375	1.62677e+06	1.91321e+06	427723	573757	7431930	9239015	8.08276e+06	8.09676e+06	6.97839e+06	9048630	5709416	5436295
a Cysteine adduct	14.7994	191.025	5339807	1.49787e+06	4318951	3763568	7.57782e+06	7678328	4.89854e+06	5.22973e+06	192035	220079	164236	215387	218690	177444	240906	256540
Acetyl phosphate	13.2831	139.987	66193.8	0	144196	129623	166956	112533	144567	190857	0	0	0	0	0	0	0	0
Acetyl-CoA	12.4663	809.127	3009026	1.97154e+06	3.18501e+06	2.25614e+06	2.93085e+06	2.06216e+06	3.15454e+06	2.66049e+06	0	0	0	0	0	0	0	0
Adenine	9.28994	135.055	3.20244e+06	186178	5018022	2.10931e+06	5.90879e+06	3.65193e+06	5.15576e+06	4573785	20240.6	22375.8	17983.3	27033.7	18707.7	18109.8	21281.5	24481.4
Adenosine	9.22888	267.097	28828700	1450390	45245272	19468696	53591128	35041928	47581184	41412944	82836.9	60500.7	130387	47502.7	49084.6	95884.2	76831.9	103419
Adenosine 5'-phosphoramidate	9.45459	346.079	66633.6	148328	0	43754.2	67038.7	47399.6	106073	129468	175977	75826	150881	160979	111542	220413	142561	128866
ADP	15.0117	427.03	7.11581e+06	5004507	9357845	7.1949e+06	9315871	7424568	12455313	8810057	37133.3	0	0	21565.7	0	0	0	0
ADP-ribose	14.6857	559.071	659846	164393	574333	575281	626045	490574	715490	768188	0	0	0	0	0	0	0	0
Ala-Ala-Ala	11.2226	231.122	0	0	0	0	0	0	0	0	125890	114083	117311	139926	89692	110991	105577	65675.2
Ala-Ala-Ala-Asp	14.4271	346.149	6757952	7177975	3.79053e+06	1.62068e+06	9493878	7513087	2.23382e+06	2.23951e+06	5.52287e+06	7.58353e+06	5102440	6.30023e+06	6.47499e+06	6.244e+06	4.57123e+06	4816269
Ala-Ala-Ala-Ser	12.4055	318.154	362630	244126	503932	515713	387955	399363	396734	446510	0	0	0	0	0	0	0	0
Ala-Ala-Gly	12.9863	217.106	42404540	20910524	35711624	25350168	62098644	57843092	25356076	29266718	21084324	21843894	22083258	24043838	19275118	19788856	19507764	13838488
Ala-Ala-Gly-Arg	14.8216	373.207	711402	618492	857794	552620	981866	620511	965367	666334	0	0	0	0	0	0	0	0
Ala-Ala-Ser	12.0835	247.117	0	0	0	0	0	0	0	0	98700.3	86901.6	96473.5	100521	73896.3	86437.3	74874.9	69077.1
Ala-Asn-Ser	16.7259	290.123	1.2651e+06	925628	1.32148e+06	1.24038e+06	1.34393e+06	1.22319e+06	1.02295e+06	1021650	234585	232144	233035	240897	238898	263818	255054	280023
Ala-Asp-Arg	15.2773	360.176	761117	458351	769869	680942	678937	489750	625411	709642	0	0	0	0	0	0	0	0
Ala-Asp-Asp	16.6367	319.102	365658	186555	261360	156916	325819	248399	342143	319842	0	0	0	0	0	0	0	0
Ala-Asp-Asp-Cys	15.9765	422.111	206045	117856	173796	192614	220766	141094	170616	182395	0	0	0	0	0	0	0	0
Ala-Asp-Cys	15.7148	307.084	4416761	3.16094e+06	8566438	4307877	9485754	6.68402e+06	8770150	7838376	326857	147301	330251	369895	178103	227188	167901	193611
Ala-Asp-Gly	15.6596	261.096	623431	357914	606074	293270	587962	396896	517984	452616	184531	207221	222853	190344	283841	242249	230128	264754
Ala-Gly-Pro	10.2302	243.122	153472	225349	177771	140793	317410	316472	154434	181172	894475	1.04227e+06	908495	857113	867454	1.10425e+06	956415	1.01923e+06
Ala-Gly-Ser	13.0275	233.101	20838.7	0	16174.1	0	20414.9	17569.1	38099.4	19858.3	107290	120202	115009	145413	132964	120547	108213	98190.7
Ala-Ile-Gln-Ile	12.3749	443.274	0	0	0	0	0	0	0	0	382490	247212	344005	266844	336646	137326	122030	236619
Ala-Leu-Gly-Arg	11.3154	415.254	333151	212037	244306	185017	410200	414329	170772	195849	451419	799664	394162	377270	702478	373050	489293	583799
Ala-Leu-Met-Ser	9.3544	420.204	897111	879048	923571	673520	1.06607e+06	838540	740846	732088	657066	1.54051e+06	780771	780035	1.28774e+06	677692	1.12819e+06	1166260
Ala-Leu-Trp-Arg	23.4538	544.311	91930	133083	104809	45386.8	187940	138724	65744.7	71389.8	276256	257375	246811	234845	282050	228520	225855	239575
Ala-Lys-Trp-Val	27.9344	502.291	189071	174380	166852	172562	187236	171377	198311	167647	190394	208297	193632	188781	192398	182221	179873	188797
Ala-Met-Phe-Asp	12.5574	482.183	90682.6	84384.6	75961.6	63270.3	82544.9	83477.9	78329.1	61202.2	34349.8	24644.4	46853.5	24601.2	53995.1	27969.7	52021.3	27388.3
Ala-Thr-Ala-Ala	12.7944	332.17	0	0	0	0	0	0	0	0	134031	125587	110113	98141.4	131495	80884.3	55341.9	0
Ala-Thr-Ala-Gly	17.8645	318.154	183596	105517	200822	141489	183058	149420	215625	162206	0	0	0	0	0	0	0	0
Ala-Val-Asn-Asp	14.0423	417.186	0	0	0	0	0	0	0	0	596607	675470	624529	624073	633326	643468	653035	642833
Aldicarb	10.3236	190.078	0	0	0	0	0	0	0	0	174617	247284	254803	293024	237896	312161	199472	373886
Allantoate	14.7831	176.055	0	0	0	0	0	0	0	0	222665	231383	202884	191359	198566	183708	210175	236608
Alliin	8.85787	177.046	189327	224167	207381	202863	244055	215194	252043	196829	0	0	0	0	0	0	0	0
allopurinol	8.30927	136.038	102427656	329655	493744	317187	647081	517214	444355	425006	360704	374445	387205	274897	460252	404938	493610	413227
allylcysteine	7.66165	161.051	564482	593256	396315	158740	603324	283061	392977	408452	0	0	0	0	0	0	0	0
alpha-D-Glucosamine 1-phosphate	15.2771	259.046	1.10193e+06	752884	995752	884406	1.3046e+06	1.05918e+06	1.12185e+06	922539	45221.8	61602.3	39694.2	50626.5	42982.8	55732.4	50502.4	38571.1
alpha-Irone	4.2904	206.167	440129	404374	438643	435144	470339	554740	466709	494996	1.46636e+06	1.23904e+06	1.16979e+06	1.35309e+06	1.32237e+06	1331712	1044335	1.05363e+06
alpha-Methylstyrene	4.27769	118.078	837496	969957	709425	530093	1.04088e+06	323294	533084	376871	6.62938e+06	9191239	4.26905e+06	6693297	4.62871e+06	5.13087e+06	4.48586e+06	11961716
AMCC	8.49778	220.052	1.27407e+06	662459	974088	405172	945734	736920	744619	477168	0	0	0	0	0	0	0	0
Aminoimidazole ribotide	15.1972	295.057	1.03527e+06	1.22042e+06	1185915	813900	0	0	0	0	0	0	0	0	0	0	0	0
AMP	13.8678	347.063	2.4583e+06	1.48635e+06	2344781	2.46759e+06	2216195	1.65053e+06	3.88407e+06	3.59452e+06	63357.9	51797.9	76760.7	75332.7	35247.4	51146.1	33234.6	53860.7
Anthenoside A	3.86298	679.467	9175949	10326225	8763554	8768191	11405728	11271540	8438377	9083827	5790120	4329854	4.29033e+06	4.16166e+06	3.34869e+06	3.44579e+06	4.62373e+06	5.68438e+06
Anthranilate	11.776	137.048	681952	1.23624e+06	540511	1663491	640332	848398	1.01583e+06	896672	290094	387703	362497	227482	362189	239533	287169	293855
Antiarol	4.49344	184.074	164047	159683	157034	147481	207570	154923	190059	216689	10332.9	12308.5	0	18406.4	0	0	7514.31	0
Apiole	4.439	222.089	325082	380922	331094	299288	291336	342750	377737	341191	1.57742e+06	508736	1.3683e+06	668362	2.3685e+06	594652	1.43622e+06	442399
Arbutin	7.6655	272.09	164768	379950	462394	308089	456079	306687	280541	409452	0	0	0	0	0	0	0	0
Arecoline	7.61452	155.095	340285	321080	297595	284775	427656	260597	215720	301044	602020	522361	521330	457461	582163	506240	515568	529972
Argininicacid	15.5416	175.096	1.20652e+06	882464	1.75579e+06	1.01258e+06	1.26865e+06	870233	1.14713e+06	955496	416152	457309	461666	547631	436919	480397	352573	361695
Arg-Leu-Lys-Thr	14.171	516.339	0	0	0	0	0	0	0	0	194297	195178	170685	210606	199165	197547	206804	191260
Arg-Leu-Thr-Tyr	17.5022	551.308	424929	361468	432369	487372	441557	397340	437251	451578	651584	683860	618603	631672	387043	350813	350223	599931
Ascorbate	14.2849	176.032	936370	258175	1.09723e+06	768420	685057	569831	984856	1.04704e+06	0	0	0	6911.31	14986.2	0	0	12081.1
Asn-Asp-Asp-Pro	14.7266	459.16	378028	239141	407437	334918	504444	380472	307875	391411	0	0	0	0	0	0	0	0
Asn-Cys-Cys	14.6184	338.072	0	0	0	73623.1	0	97433.8	0	70747.7	1586712	1.30059e+06	1.42027e+06	1.56349e+06	1.33539e+06	1.78387e+06	1.31794e+06	1.44135e+06
Asn-Gly-Pro	12.9698	286.128	167683	55599.4	185118	124510	148909	99382.5	188476	154811	0	0	0	0	0	0	0	0
Asn-Lys-Ser-Ser	12.4318	434.213	0	0	0	0	0	0	0	0	20386628	20732188	19753806	20723084	20586160	19629302	20701834	14457714
Asn-Met-Cys-Pro	13.0046	463.156	0	0	0	0	0	0	0	0	0	0	0	0	0	0	0	0
Asn-Met-Gln-Pro	9.26432	488.206	10931621	519549	15787307	7.05507e+06	19872300	12506846	15072430	15192060	0	0	0	0	0	0	0	0
Asn-Val-Asn-Ser	9.27297	432.196	906527	1.03623e+06	841735	865563	832363	880425	914036	894744	477775	731820	405475	553454	565965	352206	541437	508677
Asp-Arg	18.1732	289.139	323327	203577	386583	277257	420244	339419	487045	384172	0	0	0	0	0	0	0	0
Aspartyl-L-proline	15.4884	230.09	1.10984e+06	877925	1.11545e+06	693939	1.46099e+06	1.07326e+06	1.07161e+06	1.08232e+06	0	0	0	0	0	0	0	0
Aspartylysine	18.1002	261.133	234873	131209	266976	208174	298972	204453	290795	275049	0	0	0	0	0	0	0	0
Asp-Asp-Pro	16.114	345.117	653517	360773	697500	429149	547959	479481	767356	546576	0	0	0	0	0	0	0	0
Asp-Cys-Cys-Gln	16.1315	467.115	0	0	0	0	0	0	0	0	0	0	0	0	0	0	0	0
Asp-Cys-Cys-Ser	16.9063	426.088	4843655	6865177	2.19943e+06	621813	4.97898e+06	4.3113e+06	1.71945e+06	1.08639e+06	112029	101593	77599	70797	93177.1	90287.2	92750.7	96615.3
Asp-Gln-Gln-Pro	21.8342	486.207	166636	111359	155993	119300	212261	155303	192651	152151	0	0	0	0	0	0	0	0
Aspidinol	4.65089	224.105	704608	666352	549961	675570	646578	584665	683058	868517	28576.6	14673.9	17486.6	23396.7	33977.2	32380.7	28596.3	23244.1
Asp-Met-Asp-Gly	15.7018	436.127	11021371	1964731	9340946	3012707	10782924	5.00621e+06	11893668	8812959	0	0	0	0	0	0	0	0
Asp-Pro-Ser	13.7285	317.122	0	0	0	0	0	0	0	0	639239	938802	731051	773034	784873	954319	603383	863139
Asp-Thr-Cys-Cys	16.6444	440.104	50811.6	128619	51186.6	0	154020	155135	0	0	0	0	0	0	0	0	0	0
ATP	16.1427	506.996	55035684	48439216	75230864	51791808	73331408	55745756	67859184	63811708	71742.8	20820.4	66690.9	66448	26038	44112.7	31260.9	39622.2
Aurin	11.4543	290.094	211586	151688	89803.6	32640.2	178356	135534	66479.2	50104.6	0	0	0	0	0	0	0	0
bacteriopheophytin a	3.81761	888.576	165400	1.75168e+06	502962	194224	646783	343374	126140	310404	0	0	22903.6	0	0	0	38914.3	15635.7
Bakkenolide A	4.28058	234.162	217258	292900	255571	291967	301698	289486	246977	239218	564413	465074	473941	530632	535173	424861	438294	402934
Bendiocarb	4.81222	223.084	166416	93101.1	209531	149484	188985	204685	122748	161875	0	0	0	0	0	0	0	0
Benzene-1,2,4-triol	14.1379	126.032	612158	692922	485403	369766	868000	925115	519372	447203	746841	1.59949e+06	764710	816418	816336	788339	692353	841144
Benzoate	7.66881	122.037	2.35179e+06	2331744	2.34153e+06	1.83545e+06	2.44682e+06	2.31546e+06	2.00172e+06	2.1285e+06	969087	1.07299e+06	996165	916518	1.10914e+06	1323128	854345	773825
Benzyl (2R,3S)-2-methyl-3-hydroxybutanoate	4.92598	208.11	437636	397434	384808	448175	417212	417187	388845	504559	37354.1	22547.3	39940.2	49606.5	39759.3	39344.2	31496.7	38667.6
Bergaptol	15.1581	202.027	48312.2	65474.9	56134.4	53440	55500.7	46870.9	50422.1	68095.5	155129	162518	153883	200633	172313	140400	178330	169816
beta-Alanine	15.1367	89.0477	3174842	6478398	3.25054e+06	3.04734e+06	5179947	3871931	3.78153e+06	3.65842e+06	407101	315929	455481	8530748	9177083	8167752	7.92044e+06	7367269
beta-Alanopine	8.03719	159.053	94545	75230.7	144044	112273	132868	102000	80443.4	73732.8	9021.42	9849.67	8228.59	9172.81	7649.69	8154.58	9256.05	10665.9
beta-Citryl-L-glutamic acid	19.4457	321.07	17850654	13698246	18980530	15059311	21178620	15228714	18591374	15490763	77306.7	100707	102956	71673.6	85800	90706.7	101897	95448
beta-D-Fructose 2,6-bisphosphate	16.0933	339.997	1.95025e+06	368589	2.01533e+06	758957	1.53191e+06	661772	1.76199e+06	1.29675e+06	531803	575071	516296	484252	518088	509674	487532	524534
Betaine	11.4161	117.079	12443854	9690806	12387330	7724933	18133438	10767111	14694645	10865604	16214115	14751079	11870381	11077804	12865679	13128461	11497279	12585943
Betaine aldehyde	28.1731	101.084	275448	441301	364183	238521	404288	221725	274432	257931	309645	237547	250458	227227	394333	268494	241442	365262
Biotin	8.87817	244.088	2.44376e+06	1.65022e+06	1.96638e+06	1.36201e+06	2.26509e+06	1.70973e+06	2034600	1.52817e+06	1705791	2.29017e+06	1.9088e+06	1.84117e+06	1.98723e+06	1.84416e+06	2.0008e+06	1.80583e+06
Biotinsulfone	12.7203	276.078	185643	79424.4	126289	78077.1	143477	152069	103989	87774.3	0	0	0	0	0	0	0	0
Boc-Asn	7.88354	232.106	90375	33391.3	307041	615098	174010	156995	259214	437761	0	0	0	0	0	0	0	0
Botrydial	4.3622	310.178	866888	1.13329e+06	973924	956337	770344	981021	925130	1.12304e+06	0	16735	31957.4	21352.7	80152.2	0	40034.6	17986.8
Butanoic acid	7.67851	88.0524	314932	419355	332366	359693	356331	298799	344953	399396	305069	406124	347237	291845	240125	383904	370118	342180
Calystegin B2	13.821	175.085	213743	116212	226604	212934	201403	219590	299383	243425	26119.5	46154.6	27543.8	21971.6	22095.7	25478.1	28031.3	32050.4
Caproylcholine	7.8635	201.173	356751	289630	236699	253411	271503	219094	204269	290220	39177.1	54676.2	212025	79087.7	61782.2	108510	52284.1	68584.8
Capryloylglycine	5.07534	201.137	165972	261398	247492	165105	217891	312301	208682	226007	55001.9	60201.8	132603	60657.9	100893	100623	66167.2	54075.2
CAPS	9.26324	221.108	505800800	471488800	510955872	472692000	532916896	505470528	482580096	517848672	94142256	101431840	86041280	91535112	95333328	97805232	97312960	91976208
carbidopa	8.38403	226.095	125455	63869.4	94305.6	70436.4	101251	95972.2	87614.4	78906.4	0	0	0	0	0	0	0	0
Carboxin	4.62367	235.067	0	0	0	0	0	0	0	0	20702482	1.62848e+06	5368496	6148335	27654892	1.47808e+06	6.82551e+06	722927
Carnosine	15.6948	226.107	129147	148220	97983.7	0	249043	127393	69814	75833.7	308381	331600	307728	315385	329936	289478	333889	334610
Carpacin	4.71616	192.079	118042	121112	132737	150316	156339	144878	178335	175334	0	16484.3	0	0	0	0	0	21894
Catechol	13.5851	110.037	92176.5	78412.5	62423	65584.6	68539.5	65519.1	70725.6	69960.2	212248	256775	282679	205734	215121	292875	244819	222378
CCCP	7.67564	204.02	1.19112e+06	2.64112e+06	713449	403800	1.21623e+06	754754	457567	638524	0	0	0	0	0	0	0	0
CDP	16.7839	403.019	1.17171e+06	847200	1.3982e+06	1.14622e+06	1.65578e+06	1.17696e+06	1.8116e+06	1.31968e+06	0	0	0	0	0	0	0	0
CDP-choline	15.2972	488.108	53948852	35448796	60363224	44632584	58208484	47875820	51535956	49801956	0	90374.6	83251.9	0	65494.1	92666.5	131533	100007
CDP-ethanolamine	16.2815	446.061	4.82144e+06	2.72158e+06	5487636	3.53306e+06	5471208	4426384	5973834	4.77647e+06	0	0	0	0	0	0	0	0
CDP-ribitol	16.4132	537.076	312544	191319	306674	231740	336012	277000	261764	306794	0	0	0	0	0	0	0	0
Cerulenin	11.2817	223.121	440870	432926	456903	336197	421333	385830	443460	367258	448847	383139	414805	330651	436769	413053	414018	415391
CHAPS	9.20845	614.396	104776104	101324312	108652344	109495656	116289552	119012312	110490120	115307984	15831691	21352840	17208598	16026355	20335716	15675537	20014618	18547012
Chelilutine	12.0336	377.126	868777	406826	1.39415e+06	1.31794e+06	901382	933367	973052	1.01784e+06	0	0	0	0	0	0	0	0
Chelirubine	12.3769	361.095	31871.6	40129.9	113177	196748	105398	45037.4	87872.6	75837.6	0	0	0	0	0	0	0	0
Choline	19.1986	103.1	428788	203010	850806	707523	490306	581685	506896	746891	5514939	5975006	5.57965e+06	5.33944e+06	5.05978e+06	6.21904e+06	5.75758e+06	4920717
Choline phosphate	14.9644	183.066	2438748928	2200291840	2353938176	2244306432	2531181056	2258294784	2348332032	2280350976	11644712	9854632	11017674	9565490	13061891	11611633	11973788	10783588
Cinnamaldehyde	4.27928	132.058	0	0	0	0	0	0	0	0	539492	637457	284054	437707	353248	348869	252614	731993
Cinnamyl alcohol	4.38824	134.073	198211	145348	160347	202071	114312	196400	170392	159843	1.81814e+06	2.03759e+06	690763	1.67325e+06	1.01278e+06	982652	928193	2.98736e+06
cis-Aconitate	17.4848	174.016	3.17789e+06	4.24916e+06	3423949	4.10361e+06	5819879	4.11794e+06	3.92956e+06	4.32402e+06	318517	369740	402932	364851	391163	407007	415341	384337
Citrate	17.7463	192.027	65120608	62726508	76319560	78542640	94510736	84856936	83739984	89959480	5216911	5.13841e+06	5.73705e+06	5.81978e+06	5933866	6482181	5942875	5808995
CMP	16.2881	323.052	91222.6	88531.8	108269	60443.3	133094	101568	125717	85246	0	0	0	0	0	0	0	0
CMP-N-trimethyl-2-aminoethylphosphonate	14.4775	472.113	2.51089e+06	1352015	2.98305e+06	1.64781e+06	1.48669e+06	1.77435e+06	1.78073e+06	1.8456e+06	0	0	0	0	0	0	0	0
CoA	13.6318	767.115	2.36331e+06	1.3664e+06	2.66053e+06	1944314	2461702	1.79732e+06	2787746	2.02763e+06	0	0	0	0	0	0	0	0
CoA-glutathione	16.7614	536.092	391428	176558	375850	291691	566942	485071	347469	326571	0	0	0	0	0	0	0	0
Coniferyl alcohol	4.53887	180.079	709645	744440	542380	666376	693983	600731	725388	826246	0	0	0	0	0	25031	24181.9	0
Convicine	17.9545	305.086	932525	671115	1.07321e+06	819116	935618	830334	1.02945e+06	773413	0	0	0	0	0	0	0	0
Corydaline	10.9077	369.194	54463.4	56069.3	154815	181021	83426.7	478714	149317	251721	0	0	0	0	94510.6	0	0	72994.6
CPPU	4.03907	247.052	0	0	0	0	0	0	0	0	2.98191e+06	2.91781e+06	2724157	2.86091e+06	2.83306e+06	3.93172e+06	2.62114e+06	2.22962e+06
Creatine	14.6508	131.069	517246144	215840160	447711808	326708960	516218560	407814016	594815424	455859744	15428205	16811740	17624840	16583370	17173666	17616314	17148168	17064542
Creatinine	9.81451	113.059	8947692	8549888	9555037	6.38126e+06	14505171	10504273	8589191	8.256e+06	14779437	15481793	15261955	14280242	15289480	17204796	13779165	14600224
Crinasiatine	8.29153	359.116	196732	89073.4	144630	57361.6	233357	170748	105741	122845	0	0	0	0	0	0	0	0
CTP	17.8704	482.985	6.0636e+06	6.54411e+06	8180218	6.47431e+06	8773990	7.23262e+06	7.58828e+06	7487420	24679.3	0	31080.7	30652.9	0	26246.6	0	0
Cumene	4.31279	120.094	2.43312e+06	2703607	2.53465e+06	1.55337e+06	3533129	849191	1.9779e+06	1.06631e+06	295840	82103	99288.6	92974.4	216388	94540.4	171805	32152.7
Cyclic ADP-ribose	14.2968	541.06	7.08633e+06	3559415	6.80672e+06	5.81095e+06	7.9427e+06	6300261	7250235	6782022	0	0	0	0	0	0	0	0
Cyclohex-2-enone	4.42476	96.0574	1.19434e+06	1.20754e+06	1.19407e+06	1.0505e+06	1.17804e+06	1.05182e+06	1.20773e+06	1.39621e+06	80321.8	50256.3	55614.9	83841.8	57970.5	30668.1	41749.5	16216.4
Cyclohexanone	4.49701	98.0731	368544	405823	302816	336460	338678	291457	353604	408290	6930.08	10007.5	11234.6	8911.04	0	8902.69	10069.7	5317.92
Cys-Cys-Gly	15.5641	281.05	0	0	0	0	0	0	0	0	339166	386551	411942	428611	324842	449304	279478	432182
Cys-Glu-Glu-Gly	13.1137	436.126	0	0	0	0	0	0	0	0	140837	117675	118790	90361.7	139873	107040	121518	97266.4
Cys-Gly	10.9382	178.041	1.19552e+06	3.04614e+06	521440	56162.7	1.48287e+06	462860	257956	128754	0	0	0	0	0	0	0	0
Cys-Leu-Met-Met	12.6002	496.184	310532	0	338738	134441	273608	148315	414455	291840	0	0	0	0	0	0	0	0
Cys-Met-Met-Met	11.7267	514.141	139808	0	203767	171333	130923	118538	197684	202560	0	0	0	0	0	0	0	0
Cystathionine	17.0555	222.067	55500.7	44878.6	62010.8	0	58243.1	51253.9	0	0	88248.2	113899	87180.1	102869	87749.5	92463.1	89925.1	132071
Cys-Thr-Ser-Tyr	12.3355	472.164	0	0	0	0	0	0	56434.6	0	1956781	1.78655e+06	1.96082e+06	1.85561e+06	1.65813e+06	1.91274e+06	1.75437e+06	1.536e+06
D,D-diaminopimelate	22.5439	190.095	30443.8	43119.6	23888.1	23567.9	54504.9	46451.8	21435.8	27195.5	118202	114203	98702	110540	101563	118729	103087	114902
D,L-α-methylphosphinothricin	13.8383	195.066	157529	86852.1	212320	125875	182707	144699	223325	188377	0	0	0	0	0	0	0	0
Daminozide	7.74338	160.085	2.56764e+06	1.67624e+06	2.71285e+06	1.60391e+06	3475248	1.08205e+06	2.73902e+06	2.0271e+06	0	0	0	0	0	0	0	0
D-Apiitol	10.6686	136.074	164915	105192	86467	105880	98396.1	118586	101874	121034	80798.4	117863	91173.5	68870.3	129503	107295	117417	98135.3
D-Asparagine	12.3304	132.053	433325	300258	424517	295777	530217	483900	484621	434982	976740	1.09812e+06	985965	1.06354e+06	1.08972e+06	1.10335e+06	1.04081e+06	1.06079e+06
dATP	15.419	491.001	1.99073e+06	1.59791e+06	2.20978e+06	1.82968e+06	2.63725e+06	2396871	2892256	2566918	0	0	0	0	0	0	0	0
dCTP	17.0345	466.99	153540	113904	198944	111042	151361	121059	172303	121206	0	0	0	0	0	0	0	0
D-Cysteine	16.192	121.02	0	0	0	0	0	0	0	0	972909	966543	995718	943123	929417	899353	960628	912204
deacetylcolchicine	15.0617	357.157	0	0	0	0	0	0	0	0	518027	576948	651796	392398	566465	598867	537896	536792
Decanoic acid	4.32747	172.146	2.00922e+06	2242137	2.14843e+06	2258704	2.44003e+06	2.51162e+06	2.34073e+06	1.99125e+06	527899	525257	703206	499081	687185	631551	548941	446541
Dehydrophytosphingosine	4.50422	315.278	131696	56556.7	92180.8	98365.6	72379.6	142792	115988	189882	14610.5	36526.9	16593.3	24353.6	31573.9	13649	23960.2	22011.7
Deoxycytidine	10.1441	227.091	632123	250675	730853	410732	580820	452594	639855	519924	27781.8	29031.6	22974.8	24138.6	28165.5	21658.3	36844.5	26467.8
Deoxyhypusine	23.4592	217.179	67994	88090	88253.7	45019.6	111464	76113.7	115576	73583.1	0	0	0	0	0	0	0	0
Deoxymannojirimycin	15.895	163.084	0	28661.8	0	33832.7	43656.1	0	44149.9	0	92470.9	81457.2	76047.4	77754.2	98692.7	76397	85942.8	119687
D-Erythrose 4-phosphate	13.2547	200.009	1.32343e+06	148484	2.65405e+06	2463540	3303260	2.38579e+06	3.77348e+06	4.9605e+06	0	0	0	0	0	0	0	0
Dethiobiotin	10.235	214.132	147000	100332	205453	106746	160341	132127	147720	134560	0	0	0	0	0	0	0	0
D-Fructose	13.5095	180.063	618957	259676	576047	450312	716309	542289	760922	620901	1.20255e+06	1.34817e+06	1272773	1.20397e+06	1.28802e+06	1.27756e+06	1214080	1.25138e+06
D-Fructose 1,6-bisphosphate	17.7429	339.997	3.4411e+06	1.46771e+06	11354690	4.98779e+06	4286176	2.41252e+06	3.11175e+06	2791554	33432.3	15280.5	34197.3	38006.9	20654.1	24326.9	20495.5	22087
D-Fructose 6-phosphate	15.9825	260.03	4169795	3484740	3.35526e+06	3795803	7.48772e+06	5.26427e+06	7.46232e+06	5219922	24072.3	22129.6	47534.2	38655.4	37643.3	25692.9	34508.4	20639.8
D-Galactose	12.8069	180.063	337972	198269	309968	583744	233746	263214	333948	327283	65259.8	98927.9	63463.2	56729.6	80162	68991.1	66109.9	68522.3
dGDP	16.1349	427.03	4.28824e+06	3.69818e+06	6258872	4.09014e+06	6.04362e+06	4.62457e+06	5.82829e+06	5.6751e+06	12292.1	0	9231.83	9173.38	0	9396.29	0	0
D-Glucarate	16.8278	210.038	371553	274172	395805	332573	474074	348429	445915	344174	37031.4	49689.6	30313.3	37235.9	28091.5	33910.9	32677.5	36234
D-Gluconic acid	14.0881	196.058	13298450	3.90234e+06	13306851	12367276	14585624	11031360	13426693	11610304	562812	680903	701156	574167	686649	645582	674616	653029
D-Glucono-1,5-lactone 6-phosphate	17.4257	258.014	719667	656470	855640	1.35306e+06	1.36329e+06	1.26175e+06	798173	937554	0	0	0	0	0	0	0	0
D-Glucosamine	13.5351	179.079	2.88803e+06	2.17639e+06	2.83742e+06	2.02707e+06	4.50043e+06	3.04374e+06	2.97784e+06	3.04518e+06	13301742	14429832	11715709	13302174	14508075	14228856	13379282	14505033
D-Glucose	14.5296	180.063	841494	705295	648985	602781	1.53399e+06	1.51678e+06	789446	963889	11807368	14173534	11295908	12978447	12878890	13126504	10283416	11999586
D-Glucose 6-phosphate	16.6819	260.03	9058514	7560875	8947330	11607180	16370683	15995831	16576220	14866118	47975.3	41738.9	56759.4	43843.9	47363.9	46756.9	48943.6	54737.2
D-Glutamate	11.0341	147.053	4581758	3803939	4.0186e+06	4291714	4.1466e+06	3.73531e+06	5779208	5365198	50847.6	63254	54702.8	43523.6	105180	42982.8	44353.9	64031.2
dGMP	14.8434	347.063	1.99707e+06	885585	2761511	1415210	1519732	1.28896e+06	2.33119e+06	1.71979e+06	0	0	0	0	0	0	0	0
Di(2-ethylhexyl) adipate	3.96647	370.309	266314	299854	239939	338488	1.12674e+06	327957	324280	281160	179622	177012	122107	88484.3	192955	107498	228534	112292
Diacetylhydrazine	13.8121	116.059	0	0	0	0	0	0	0	0	430413	836919	599547	690088	590543	898464	366866	709347
Diacetylmonoxime	7.56696	101.048	339364	1126996	389337	267284	629130	395208	247985	269241	15554.2	16865.2	14823	16049.3	19876	30407.4	19506.5	17166.3
Dibutyl phthalate	4.5872	278.152	1.02444e+06	826105	753131	1.15994e+06	1343408	1.41158e+06	960994	1.10334e+06	562498	468595	520061	460266	740281	508459	534310	500284
Dichloroacetate	7.6354	127.943	356526	181012	175994	342966	387169	334844	411953	295251	0	83942.1	0	0	523613	201049	323540	224442
Diethanolamine	17.5775	105.079	177386	118539	160059	159957	102544	134101	143797	186878	85724.9	77407	73697	75165.7	88365.4	93181.5	81601.8	78304.9
Diethyl 2-methyl-3-oxosuccinate	7.67879	202.084	784228	726505	720061	1039023	898498	794507	1.09291e+06	1.12093e+06	12984.1	8622.39	13724.8	7506.83	34145.5	9412.22	21464.8	70102.8
Dihydro-3-hydroxy-3-(1-hydroxyethyl)-4-methylfuran-2(3H)-one	5.09708	160.074	1.59706e+06	1.57459e+06	1.64437e+06	1.7499e+06	1.88462e+06	1.62111e+06	1.70273e+06	1.37274e+06	186472	281593	123619	237964	247732	162682	125660	239962
Dihydroclavaminic acid	12.4573	200.08	60401.2	79873.6	85185.8	46834.7	113550	101252	33265.4	50556.9	10651802	9146886	10323869	10628982	8703628	9884220	8679706	6.9732e+06
Dihydrogenphosphate	14.9991	96.9689	1.41017e+06	1.00937e+06	1.35824e+06	1.03968e+06	1.59804e+06	1365495	1.5148e+06	1.47646e+06	0	0	0	0	0	0	0	0
dihydrothymidine	15.1175	244.106	134697	88578.8	201542	96779.9	150390	137556	161266	184348	0	0	0	0	0	0	0	0
Diisononyl phthalate	4.04048	418.309	1.39601e+06	682907	815482	730179	938353	1.20314e+06	559250	748178	531783	1.84203e+06	1.0693e+06	572909	838793	550874	554454	465659
Dimethyl citraconate	5.05502	158.058	1.51104e+06	1.26729e+06	1.41617e+06	1.64585e+06	1.79015e+06	1.56048e+06	1.67668e+06	1.80361e+06	41523.6	55347.6	54057.9	36780.2	28952.5	42521	32704.9	40755.4
DL-Methionine sulfone	12.0623	181.041	50485.4	30916.6	73084.9	43816.4	90142	97071.3	66629.9	82127.2	163676	158672	180163	163317	186074	147625	154204	170719
D-myo-Inositol 1,2-cyclic phosphate	16.5642	242.019	200788	0	175802	141509	76447.1	145434	211469	159472	0	0	0	0	0	0	0	0
D-Norvaline	8.80934	117.079	1.23814e+06	1.22182e+06	1.14229e+06	1.07964e+06	1.10038e+06	1.09907e+06	1.21705e+06	1.19792e+06	1.06389e+06	1216654	1.2187e+06	1092577	1.14226e+06	1.12011e+06	1.12566e+06	1.09559e+06
Docosanoic acid	3.87741	340.334	460047	556532	331647	483167	482152	560538	446235	551868	285532	412466	477147	246716	492859	231108	345513	376864
Dodecanedioic acid	5.06201	230.152	162190	168443	266253	234462	287174	279125	197722	258443	74114.9	55187.3	145283	51648.2	41716.9	67773.3	59754.1	72499.9
Dodecanoic acid	4.145	200.178	18863860	31077326	17344936	30975500	28322576	32401866	34090480	31440928	13594610	15440682	24784750	9381272	21363708	11794869	12282862	16369855
Dopaminequinone	7.9951	151.063	1347342	773195	1.00926e+06	951782	808852	1.22693e+06	541659	962660	1.69247e+06	1732524	1518320	1.54981e+06	1.65648e+06	1.81979e+06	1.69436e+06	1.44661e+06
D-Proline	11.3198	115.063	13799799	13392343	11342554	3.74192e+06	13715879	10060433	9613663	6443284	131288	112703	116367	80041	87913.2	86214.4	108671	83979.8
D-Ribitol 5-phosphate	15.5636	232.035	115833	56377.4	98945.5	69309.6	100777	76505.9	95628.4	71072.2	0	0	0	0	0	0	0	0
D-Ribose	14.5685	150.053	60078.8	41726.9	116758	41081	90963	142914	61763.1	62515.1	446333	549172	434824	535115	586382	577451	441324	499862
D-Ribose 1,5-bisphosphate	16.3908	309.986	389424	376492	435629	332482	297089	237158	251908	257939	0	0	0	0	0	0	0	0
D-Ribose 5-phosphate	15.4794	230.019	262623	420162	330875	262489	242112	237619	234708	245684	0	0	0	0	0	0	0	0
D-Sedoheptulose 1,7-bisphosphate	17.9655	370.007	221161	201385	764374	439174	362760	283459	225516	218715	0	0	0	0	0	0	0	0
D-Sedoheptulose 7-phosphate	16.1278	290.04	2.72269e+06	2.27566e+06	2.52725e+06	2.24956e+06	4784979	2.99584e+06	5526798	3.41191e+06	9646.32	8519.49	11460.2	11748.9	11166.2	10331.3	10514.1	9584.01
D-Sorbitol	13.9497	182.079	279057	187284	344911	173704	372400	265249	285777	244933	9171418	10676460	9979672	9193672	10085275	9720124	10086204	9627761
dTTP	15.7184	481.99	1.59388e+06	1.14547e+06	1.96047e+06	1.20566e+06	1.97247e+06	1.54482e+06	2021359	1.8045e+06	0	0	0	0	0	0	0	0
D-Xylonate	13.5301	166.048	5.47145e+06	2176206	5236292	4.04619e+06	5484495	4.20071e+06	6.52144e+06	6.20857e+06	318038	370587	342150	339326	369578	328482	332044	326617
D-Xylonolactone	14.8904	148.037	21904218	17839084	22180846	18957866	20539416	21169558	21035748	19680452	1.69629e+06	1.56817e+06	1902225	1.63791e+06	1.72959e+06	1.75084e+06	1732008	1.69918e+06
Embelin	7.55428	294.184	706572	597565	631877	626718	866447	613434	624962	600144	826135	804395	784736	789359	828770	792561	829424	878409
ent-Fisetinidol-(4beta->8)-catechin-(6->4beta)-ent-fisetinidol	3.84518	834.217	0	0	0	0	0	0	0	0	9523543	11067890	9223914	7.68082e+06	10318686	6579722	5054020	3.07212e+06
Epinephrinesulfate	13.0486	263.047	0	0	0	0	0	0	0	0	143508	177087	187153	182437	169824	201639	151353	155039
Epothilone A	4.16271	493.25	1.14259e+06	1.25529e+06	1.26335e+06	1.02502e+06	1.18302e+06	1.29156e+06	1241437	1.33085e+06	0	0	0	0	0	0	0	0
Epsilon-(gamma-Glutamyl)-lysine	17.0148	275.148	115435	88525.9	94506.4	120156	147794	158640	162140	86530.2	87051.5	94127.6	120139	112200	76532.4	101998	88476.5	108234
epsilon-Caprolactam	7.56513	113.084	177872	241801	178513	124385	107030	185974	225154	174512	182582	232074	158507	168797	271568	194932	182071	116341
Ergothioneine	14.7802	229.088	931523	398364	784653	549909	737368	642044	940511	665204	117276	77664.7	77060.8	80628.6	79208	53700.5	137030	83941.9
Ethanolamine phosphate	15.9265	141.019	28482564	18066664	31004914	23575828	34430912	24778174	30301784	29633668	43274.3	42777.9	55880.1	50512.2	44790.1	49872.9	57708.5	41730
Ethyl 2-methylbut-2-enoate	5.06871	128.084	2144561	1.60599e+06	1883715	2.1773e+06	2186805	2.09101e+06	2.22437e+06	2.32447e+06	70806.1	71687.9	85294.1	84129	89263.8	75720.6	71689.2	62471.9
ethyl propionate	5.0645	102.068	453201	436751	387363	487613	510183	425897	485953	378135	184606	204781	200886	183409	260442	188579	168247	207697
ethyl-(2R)-methyl-(3S)-hydroxybutanoate	4.9835	146.094	304296	294388	277622	407794	322307	314513	454798	310471	70636.2	57422.5	59996.3	41544.2	79137	63008.7	54498.8	53318.9
Ethylphosphate	9.61267	126.008	306913	174755	223806	275284	337196	201638	214335	256730	0	0	0	0	0	0	0	0
ethylpyruvate	4.45989	116.047	380062	369063	377193	417465	261472	213161	271238	288626	279009	405317	152335	345903	186005	174798	154903	455275
Eugenol methyl ether	4.50732	178.099	844813	851769	644650	902649	810149	802134	808548	933359	183724	183512	166710	198066	156492	157110	158622	176733
FA (12:2)	4.49415	196.146	307272	347432	307962	283850	443669	296182	289263	298824	103939	129322	112951	97250.2	141642	140608	96731.9	72909.2
FA (17:0)	3.96992	270.256	3.45519e+06	4496810	2195211	5.05691e+06	3934617	4649220	3.9569e+06	4.59451e+06	2.43395e+06	2.93829e+06	3.79531e+06	1.84723e+06	3.9977e+06	2.09917e+06	2.59359e+06	2.88283e+06
FA (20:0)	3.89719	312.303	2.24906e+06	3.2054e+06	1.78375e+06	3121528	2.74037e+06	3.65682e+06	3151894	3228831	2.3223e+06	2.67531e+06	3652021	1.47738e+06	3.53372e+06	1.7873e+06	1.7893e+06	2.41693e+06
FA (22:0)	4.20968	314.319	700022	871387	763658	764912	791373	975976	671808	738712	0	0	0	0	0	0	0	0
FA (6:1)	7.53904	114.068	567756	690383	531792	717613	697347	649460	667535	522891	17070.3	16099.8	13324.6	73742	11629.4	12583.9	64334.8	13561.2
FA (7:1) heptenal	5.13128	112.089	38103.1	106744	69474.3	70306.9	151445	62801.8	65068.6	128338	0	0	0	0	0	0	0	0
FA (8:0) octanoic acid	4.61179	144.115	3.26705e+06	3.84496e+06	3414683	3.31049e+06	3.68058e+06	3.62273e+06	3.53079e+06	3.53199e+06	1507293	1778419	1.72424e+06	1.64927e+06	1.74844e+06	2413111	1.60941e+06	1.38487e+06
FA (8:1)	4.94848	142.099	192117	202482	144563	134589	105924	141595	147369	149521	58809.8	102233	84086.1	71483	76121.4	144334	99461.5	77033.2
FA (8:1) octenal	4.28116	126.105	3.94687e+06	5428888	5.56659e+06	5478764	5686449	2.66147e+06	5406120	3240580	615749	111002	213243	179289	372909	83586	199074	83797.1
FA (8:2)	5.02274	140.084	779824	718625	838100	955124	1.05144e+06	915401	955083	1.13505e+06	27757	26432	16125.3	28485.4	31905.5	27064.1	24990.2	25074
FA (9:1) nonynoic acid	6.84048	154.099	127784	125797	107689	123510	157584	173861	165177	153015	81307.2	87235	72878.3	74203.2	89848.8	124824	83685.1	78507.8
FA (9:2) nonadienoic acid	4.54306	154.099	656212	716552	491738	641556	549377	688523	599992	729986	106383	92633.5	122200	101648	160886	115410	108436	77815.7
FA dioxo(10:0)	5.02196	200.105	2658388	2.47307e+06	2.8734e+06	3.24981e+06	3.55425e+06	2.92696e+06	3197709	3520373	49308.5	59438.6	86559	32932	37664.5	65205.5	54633.3	53703.4
FA hydroxy(10:0)	4.93312	188.141	187336	225672	174665	210235	200569	223376	273006	211030	56985.1	42247.7	30029.3	39128.1	82981.4	35043.9	41431.8	29365.9
FA hydroxy(12:0) dodecanoic acid	4.59465	216.173	82973.1	80195	74910.9	91435.7	108854	87093.4	85220.1	105095	13308.8	26562.4	24258.7	12607.5	29041.6	25667.9	20271.2	16936.6
FA hydroxy(13:0) tridecanoic acid	4.52413	230.188	93528.9	53100.7	106651	96232.8	120528	106448	94698	119606	26557.4	12627	33211	13174	51082.6	12402.3	17582.8	10252
FA hydroxy(16:0)] hexadecanoic acid	4.11759	272.235	739888	792060	663739	706984	729358	790924	882125	750401	166174	246805	249113	107626	223728	130791	122857	232715
FA hydroxy(18:0)	4.0581	300.267	698688	884673	435250	832949	840225	919393	1.41947e+06	1224744	304586	407412	754382	218979	420154	328004	196397	443270
FA hydroxy(6:0)	7.65962	132.079	162370	171041	190673	172464	381402	375207	168220	168643	299245	241750	383353	452884	329929	374240	303330	397939
FA hydroxy(8:0) hydroxy-octanoic acid	7.66696	160.11	469082	531015	604545	441854	683280	509419	641924	605192	590372	448449	464866	485374	417066	499778	450104	585518
FA hydroxy(9:0) hydroxy-nonanoic acid	4.57423	174.126	259441	393038	349019	430762	364397	415328	320951	268791	54532.8	48700.2	63027.3	42009.3	53703.5	48029.8	37618.3	36843.4
FA methyl(12:0) dodecanoic acid	4.10713	214.193	665653	737840	536476	796399	681032	726511	639942	735080	174631	228861	314640	238015	325784	177318	188298	235549
FA methyl(14:0) dodecanedioic acid	7.67859	244.167	178752	343208	339790	197104	338816	402125	263335	503835	25243.8	63571.5	127469	44794.2	49068.9	97465	112278	50060.1
FA methyl(15:0) tridecanedioic acid	4.28891	258.183	3.09662e+06	3.9971e+06	1.5685e+06	176444	3.52664e+06	180533	1.09329e+06	145164	16366	20347.6	49281.1	13803.3	23667.5	13160.7	21187.6	13357.1
FA methyl(18:0)	3.92345	298.288	348993	550989	304473	613198	406778	764455	615802	694818	292816	331883	527418	277485	603748	279411	227790	378614
FA methyl(18:2)	3.98101	308.235	161722	171286	122948	289059	188190	277725	191901	201008	624815	497294	1.24795e+06	176868	669810	502459	407840	754513
FA methyl(18:3)	4.08108	324.23	193070	373254	139012	305290	267982	288454	253382	390816	0	0	122675	0	148514	218482	106373	0
FA methyl(6:0)	4.84603	130.099	1.17396e+06	1.38793e+06	1.36459e+06	1.37661e+06	1.30427e+06	1561677	1.53815e+06	1.24114e+06	386490	393564	377976	385397	423014	417278	391953	320647
FA methyl(6:1)	7.66395	128.084	1.87677e+06	1.87715e+06	1.61701e+06	2.19284e+06	2.79286e+06	1948669	1.87788e+06	2.22704e+06	33162	61568.8	49105.3	37249.5	45315.1	48147.9	33489.3	74298.2
FA methyl(8:0)	4.41039	158.131	5509704	5.45272e+06	4793050	5.08896e+06	5724960	5063352	5424800	5.24545e+06	1.78345e+06	1.7347e+06	1962959	1.54868e+06	2.07921e+06	1.87377e+06	1.6794e+06	1.25436e+06
FA oxo(10:0)	4.8188	186.126	173173	256420	207470	193173	173391	264846	161480	232734	89972.9	57362.3	77549.2	66092.4	43559.4	81852.2	58476.8	31254.4
FA oxo(12:1)	4.44513	212.141	347809	410920	336002	385897	346478	333331	413362	384739	121120	87086.8	148911	70196.1	94489.7	167855	75545.7	76089.3
FA oxo(16:0)	4.06118	270.219	1.59135e+06	1.50427e+06	1.13743e+06	1376753	1.49602e+06	1.4257e+06	1.55706e+06	1693865	538374	564716	960950	421455	645263	442862	468174	570738
FA oxo(18:0)	3.99171	298.251	860930	966765	805957	969303	876992	926381	1.13925e+06	1.00114e+06	822949	903422	1.39242e+06	610646	1.187e+06	746905	559211	1.00587e+06
FA oxo(7:0)	5.0521	144.079	823773	755812	767675	880775	862552	901905	849316	891153	109784	89511.8	112198	99525.7	108981	141967	100848	107398
FA oxo(8:0) oxo-octanoic acid	5.06556	158.094	200538	164616	217812	183080	436206	219308	324570	329955	35411.3	68798.8	55292.2	28303.8	124697	30292.5	70435.3	17401.9
FA oxo(9:0) oxo-nonanoic acid	3.96496	172.11	753082	1.14212e+06	604288	762297	889219	1.03486e+06	1.11135e+06	993195	402578	543070	620141	318832	754625	413709	285958	472814
FAD	11.9339	785.158	2.89898e+06	1.34349e+06	3124533	2.30995e+06	2953766	2.30341e+06	2762188	2.38008e+06	0	0	0	0	0	0	0	0
Fagomine	12.2703	147.09	261770	241756	288021	199163	432902	389519	300963	259196	410361	405260	504330	498115	457228	407359	415005	459280
Ferulate	7.56674	194.058	166344	193870	179061	155505	286657	132378	251071	148934	672830	566389	595382	471037	627966	567788	602057	585303
FMN	12.1927	456.104	258650	214633	191927	114245	168998	116902	187071	137916	0	0	0	0	0	0	0	0
Folate	16.4263	441.14	255407	448328	322512	336147	422343	502254	235742	385720	680667	770963	694388	661046	746769	722163	748994	703524
Formylanthranilate	15.1183	165.043	199551	181484	181514	176778	215969	188351	195677	183184	447250	472583	427755	442440	469866	485648	425889	432463
formyl-isoglutamine	14.24	174.064	0	0	0	0	0	0	0	0	24465.4	52994.8	41583	44298.6	31627.6	51673.9	32486.4	54308.3
fumigatol	5.13378	170.058	3085294	2.44269e+06	2875680	3.06322e+06	3358023	3135336	3.15059e+06	3.51748e+06	0	49086	48654	58351.2	21310.6	14241.4	15317.9	18284.2
Furfural diethyl acetal	4.57677	170.094	1489816	1.82941e+06	1.32262e+06	1.64564e+06	1.54635e+06	1.61673e+06	1.89161e+06	1.84875e+06	112511	245664	228413	146605	275336	285089	146641	197377
Gabaculine	8.25539	139.063	18914.4	13044.3	21707.8	15158.8	45811.6	44861.3	42349.5	33477.3	68269.5	85866.3	73791	79415.1	77677.7	97418.3	87832.3	72119.8
gamma-Glutamyl-beta-aminopropiononitrile	9.40459	199.096	1.06723e+06	1.19796e+06	1.21803e+06	841982	1.68162e+06	1.33735e+06	859864	968592	4111120	5133452	4.54896e+06	4815550	5.09684e+06	4.81094e+06	4449885	4540906
Gamma-Glutamylglutamine	15.1965	275.112	2.8615e+06	3460196	2.90665e+06	883990	4987121	2640656	2.3348e+06	2133589	1.18211e+06	1.84732e+06	1.26105e+06	1.53082e+06	1.76759e+06	1.61076e+06	1.49889e+06	1.71661e+06
Gammaglutamylornithine	16.9171	261.133	304654	250166	383933	155624	346520	300406	360427	303072	0	0	0	0	0	0	0	0
gamma-Glutamyl-Se-methylselenocysteine	16.3469	312.022	137584	155930	88559.9	173419	112822	148933	190959	206957	0	0	0	0	0	0	0	0
gamma-L-Glutamyl-L-cysteine	14.3079	250.062	9946790	3.05649e+06	7.40471e+06	3.75607e+06	10744425	8563185	7.29179e+06	8428277	0	0	0	0	0	0	0	0
gamma-L-Glutamyl-L-cysteinyl-beta-alanine	13.3499	321.1	675454	232585	862266	720612	868808	681592	1.11728e+06	1.05314e+06	0	0	0	0	0	0	0	0
gamma-Undecalactone	4.43197	184.146	64566.6	0	68021.4	92367.9	0	107460	54348.3	0	243986	281251	297705	140780	374786	352550	186886	158918
GDP	17.6102	443.025	1.54463e+06	1.40567e+06	1.68226e+06	1663360	1.91775e+06	1.81235e+06	2.13506e+06	1.67721e+06	0	0	0	0	0	0	0	0
GDP-3,6-dideoxy-D-galactose	13.0348	573.087	588419	271656	767393	714348	711555	502060	904333	931387	0	0	0	0	0	0	0	0
GDP-glucose	17.8945	605.077	1.38501e+06	669023	1.0557e+06	927705	1.2405e+06	1070226	1530675	988281	0	0	0	0	0	0	0	0
GDP-L-fucose	17.2774	589.082	695523	589056	665162	597960	702245	621515	774778	563405	0	0	0	0	0	0	0	0
Glepidotin B	10.2132	340.131	184425	108304	159307	127968	130198	226975	116751	95364.1	208969	447932	216309	208130	394117	207252	355764	363090
Gln-Pro	10.6022	243.122	164965	225349	196502	113804	317410	311536	154434	148810	794820	946500	846877	894407	878978	987639	907051	760112
Glu-Ala-Ala	13.7671	289.128	368896	187897	366291	457638	464563	379148	400346	401677	0	0	0	0	0	0	0	0
Glu-Ala-Asp	16.3974	333.117	1.53051e+06	1.14852e+06	1.70547e+06	1.30384e+06	2.03852e+06	1.2983e+06	1.95446e+06	1647101	0	0	0	0	0	0	0	0
Glu-Ala-Glu	15.8807	347.133	273927	137387	254177	194827	279053	223114	273159	281470	0	0	0	0	0	0	0	0
Glu-Ala-Ser	13.8318	305.123	720593	297344	931327	344149	358600	211674	473818	370030	0	0	0	0	0	0	0	0
Glu-Arg	18.2496	303.154	2.1823e+06	1522990	1.84136e+06	539856	3.76775e+06	2319340	1.48211e+06	1.37352e+06	1164277	1.37153e+06	1479394	1.30822e+06	1.60545e+06	1.4948e+06	1.5129e+06	1722093
Glu-Asn	13.0896	261.096	63477.7	0	98379	0	0	92098.9	0	61386.2	0	0	0	0	0	0	0	0
Glu-Asp	17.1387	262.08	975097	575981	1.11992e+06	771650	1.13634e+06	895948	1.15351e+06	1.04862e+06	10082.1	7928.69	10437.5	10878.4	20470.1	16321.1	20494.4	11570.5
Glu-Asp-Cys	16.2279	365.089	3.13203e+06	1.60105e+06	2.82998e+06	4.68883e+06	3.26859e+06	3.60919e+06	4.36396e+06	4.89227e+06	0	0	0	0	0	0	0	0
Glu-Asp-Glu	18.3844	391.123	120911	89312.2	120449	73574.3	111244	111245	128881	98341.8	0	0	0	0	0	0	0	0
Glu-Glu	16.5719	276.096	8623551	6.52658e+06	6.25166e+06	3.61477e+06	8818538	5.84351e+06	7047180	5.63194e+06	189930	303472	196713	199503	289381	240240	285771	303668
Glu-Glu-Glu	18.2573	405.138	163093	95176.8	190389	101962	168922	153762	184883	152958	0	0	0	0	0	0	0	0
Glu-Glu-Met	13.0715	407.137	79842.1	38441	77580.6	76885.7	75112.5	61889.9	92395	102181	0	0	0	0	0	0	0	0
Glu-Glu-Met-Ser	12.7727	494.168	836719	316102	1.04143e+06	365780	956022	495705	770312	418839	0	0	0	0	0	0	0	0
Glu-Lys-Lys-Phe	16.275	550.312	268056	364207	380399	293851	358858	290795	360951	322501	605752	768497	570612	681003	751036	642416	759163	712004
Glu-Met-Ser	12.5227	365.126	21224974	8831737	22683146	18312290	19891604	13994263	22541126	22483498	0	0	0	0	0	0	0	0
Glu-Pro-Ser	12.6442	331.139	96214.4	50074.7	113334	84569.5	123589	66025.1	85165.1	61005.7	0	0	0	0	0	0	0	0
Glu-Ser-Thr	15.9673	335.133	283613	193572	276135	187246	259929	263025	250047	285107	0	0	0	0	0	0	0	0
glutaraldehyde	4.52752	100.052	747079	900140	736338	622319	808216	807053	829036	1.002e+06	35030.3	26503.1	29183.9	43245	39970.8	37389.5	37266.3	21425.8
Glutathione	14.3439	307.084	498309344	354503424	549699456	574766592	454218528	437950560	540680832	549193728	778857	284895	630889	700420	339190	476474	334288	499127
Glutathione disulfide	17.2317	612.152	21685286	10141005	22513676	18870676	29408760	26062334	18956786	20151206	65750.3	27179.4	0	0	0	0	0	0
Glu-Thr	14.7184	248.101	226936	207145	192567	240970	231373	213505	226070	238398	29489.5	43168.1	24381.3	0	40436.9	0	37803	31121.3
Glycerol	10.4137	92.0473	119380	24669.2	71110.2	37281.5	42950.1	38160.6	41089.8	35812.5	41172.4	34145.2	56849.6	21662.8	43035.2	33711.2	31783.9	32633.6
Glycerone phosphate	15.9071	169.998	12166247	7.87064e+06	12182191	8.33513e+06	11619062	8592257	11918775	10171365	109654	110888	142781	106496	126964	103929	127190	107271
Glycerophosphoglycerol	12.9797	246.051	15799461	5363676	19094402	12302589	14924539	10865105	16608814	15268991	86446.7	105551	92936.5	85141.1	93899	105641	130064	109803
Glycyl-leucine	8.24268	188.116	42792.1	39267.8	55871	66063.1	50978.4	56435.2	69721	64767.2	10395.3	18296.3	9939.95	8834.51	10453.1	8513.95	8113.99	10241.9
GMP	16.5752	363.058	187337	145200	236909	215277	200910	229242	287590	271136	0	0	0	0	0	0	0	0
GTP	18.7462	522.991	3452978	5310764	3.80839e+06	3.85103e+06	3715486	4.74258e+06	3.65249e+06	3.50466e+06	20536.8	0	19662.2	29283.7	0	23873.3	0	0
Guanidinoacetate	15.7416	117.054	584849	374715	501781	336228	643250	495974	470449	408401	339946	370961	333355	297377	337425	329721	330103	325425
Guanosine	12.6181	283.092	385710	222475	401016	184131	730195	321390	473984	512772	0	0	0	0	0	0	0	0
HEPES	10.755	238.099	694224	2.66834e+06	1.13006e+06	1705944	867378	3657911	1.08732e+06	1.67742e+06	2.45342e+06	3.41614e+06	4.13984e+06	1.10424e+06	10206567	3.13053e+06	969530	8.26525e+06
Hercynine	12.3316	197.117	69195.2	134901	63595.7	166268	89054.4	110418	148228	80640.4	0	0	0	0	0	0	84681.3	0
Herniarin	4.36885	176.047	94846.5	80699.2	117833	90035.3	132633	108803	96865.9	101799	1734965	473247	1.30748e+06	604434	2.66573e+06	395848	1.52129e+06	372028
Heterodendrin	4.75643	261.121	1.54197e+06	1.18057e+06	1450543	1.56604e+06	1.31442e+06	1311070	1429877	1.59847e+06	0	0	0	0	14445.8	0	14397.6	16276.2
Hexadecanoic acid	3.99375	256.24	195238368	241495776	126828416	236178176	206005584	274114720	285566208	263720032	205959744	214293280	328457824	136494240	320366752	168823856	163281904	222445824
Hexanoic acid	5.05997	116.084	3.56244e+06	4495777	4325270	4018166	4.57795e+06	4477849	4.53828e+06	4182603	1072154	1.11633e+06	1.1356e+06	1.30056e+06	1.32281e+06	1.48286e+06	1.19602e+06	995111
Hexylamine	14.2721	101.12	3.2538e+06	4.12959e+06	4018358	3.67253e+06	3.44331e+06	4924246	3.47726e+06	3680387	23308.2	0	0	0	0	0	0	0
His-Met-Thr-Pro	17.1851	484.211	91628.5	100822	100957	110321	89730	125717	83515.2	104525	126000	133727	120570	113794	130022	49351.1	143517	127579
His-Phe-Trp-Trp	12.3996	674.296	0	0	0	0	0	0	0	0	99855	127400	93318.3	107348	157714	100747	95839.1	92286.4
Homoarginine	18.6166	188.127	705986	92962.8	685402	415646	550737	559146	532966	397087	0	0	0	0	0	0	0	0
Homophytanicacid	3.83596	326.319	60421	107852	37111.2	53048.2	54355.5	94773.1	86051.1	112647	0	67351.5	69733.3	0	0	0	56216.4	85474.3
Homostachydrine	10.1219	157.11	140515	127718	155084	101313	160282	123269	134325	102552	173450	150730	192506	182635	147745	180374	140603	157461
homovanillate	8.76498	182.058	2.8473e+06	2.04465e+06	3.32975e+06	2410781	2907021	2.26858e+06	2.66756e+06	2.18057e+06	791605	919026	1.0605e+06	870192	979600	816336	937319	875409
Hydantoin-5-propionate	8.91183	172.048	412235	295128	530285	530481	703251	642502	467731	588293	0	0	0	0	0	0	0	0
hydrogen iodide	9.94301	127.912	125770	161733	144316	142017	199071	235508	201151	156092	207765	408592	287750	216101	542875	360761	197855	713132
Hydroxybutyrylcarnitine	11.4963	247.142	204879	114035	175325	133680	141160	119773	146811	116000	0	0	0	0	0	0	0	0
Hydroxymethylphosphonate	14.5697	111.993	202000	263853	158944	84967.2	173505	98291	225754	146815	0	0	0	0	0	0	0	0
Hydroxypropionylcarnitine	7.62328	233.126	1.39642e+06	1.11944e+06	1.11258e+06	1.29637e+06	1.02314e+06	1.47697e+06	995523	1.38971e+06	382114	352608	342008	354521	377390	339048	370697	338409
Hydroxypyruvate	15.4499	104.011	325242	267848	242508	255904	293607	304801	467420	277528	41331.6	48288.6	49730.4	31520	50383.8	35721.8	32668	41857.8
Hypotaurine	15.0098	109.02	300639	157240	251820	236029	358985	317323	492458	310266	0	0	0	0	0	0	0	0
Hypoxanthine	10.0893	136.039	118870	34770.2	0	35221.8	97708.5	71182.4	38252.3	39723.8	137208	147406	307992	107715	223830	211014	298720	158520
Ile-Ala	12.5402	202.132	1.60644e+06	905503	1.64736e+06	959543	1.97793e+06	1.36628e+06	1.54219e+06	1.85262e+06	85557.6	143355	145761	65388.5	93968.1	56500.8	75469.6	105580
Ile-Ala-Ser	9.54521	289.164	235691	251922	196580	283890	264767	306856	291999	232658	301062	348757	330225	365255	286394	340015	405940	384249
Ile-Gly-Lys	19.054	316.211	120072	134446	154746	114103	200405	96629.2	136770	115019	0	0	0	0	0	0	0	0
Ile-Lys	20.1881	259.19	1.1987e+06	711880	1.74316e+06	916526	1.68471e+06	1.10406e+06	1.43738e+06	1358913	0	0	0	0	0	0	0	0
Ile-Lys-Pro	21.0012	356.242	157328	117666	171247	118796	259362	174177	258079	197910	0	0	0	0	0	0	0	0
Ile-Lys-Thr-Trp	27.9682	546.317	104073	94794.7	94156	90638.5	106465	95448.6	97935.8	86302.8	105083	95584.6	104376	103348	119419	93665.2	99580.4	103298
IMP	15.3891	348.048	205802	237605	303489	299697	125654	139339	161771	156003	0	0	0	0	0	0	0	0
Indol-3-ylacetyl-myo-inositol L-arabinoside	15.223	469.158	0	0	0	0	0	0	0	0	111239	94215.3	113418	121891	67605.8	114915	106608	84894.2
Indole	11.6429	117.058	28206.9	29094.4	24968	21406.7	44646	37553.3	30799.1	21650.5	45697.9	51775.7	35387.3	38858.2	56065.4	46911.7	45820.9	46885
Indole-5,6-quinone	10.1459	147.032	111182	110519	106628	116178	117471	112417	117653	110067	116629	154279	110861	84914.3	111105	108062	105621	102917
Indolelactate	7.80286	205.074	359324	331883	388658	332411	413990	347370	371179	260862	274222	401184	263100	286826	271864	253241	314623	331271
Inosine	10.9409	268.081	5714377	2.38102e+06	1.78455e+06	379868	1.78237e+06	735791	1.2162e+06	826620	0	0	0	0	0	0	0	0
Iridodial	4.54811	168.115	467135	524718	485583	523596	440683	480972	502280	507987	93796.5	117952	110127	108738	131759	149444	96755.6	85583.4
Kinobscurinone	12.6585	306.053	424210	267126	429350	323328	433633	349845	400744	372165	0	0	0	0	0	0	0	0
L-1-Pyrroline-3-hydroxy-5-carboxylate	11.0995	129.043	24600990	23507234	19625510	7.00741e+06	24158596	18210964	17499932	11372571	134816	148824	147770	131720	201405	150688	176565	132344
L-2-Amino-3-oxobutanoic acid	14.1645	117.043	54315.4	83402.5	52334.5	97035.2	74337.3	90765.8	81195.6	62663.3	30992.7	55426.6	33301.5	37722.6	44043.1	46456.8	31506.3	43847.1
L-2-Amino-6-oxoheptanedioate	9.66205	189.064	5.13332e+06	2371622	5.11139e+06	4.72179e+06	5.67076e+06	5236238	4.73555e+06	5217831	0	147343	28059.8	0	105048	31927.9	0	175075
L-3-Amino-isobutanoate	12.1993	103.063	1.02508e+06	1.03688e+06	967736	903571	1.13797e+06	1.00514e+06	1.04787e+06	1.04203e+06	946983	1070773	988923	627601	1064200	943552	1.16926e+06	920148
L-4-Hydroxyglutamate semialdehyde	16.1962	147.053	3.54879e+06	3.04148e+06	3.34324e+06	2.85966e+06	3040389	3.0074e+06	3.08237e+06	2.71497e+06	281851	269977	258113	220863	276310	229348	283031	254726
L-Alanine	14.7955	89.0477	22942988	16366460	23096836	20888352	27081206	23549546	21031142	24630902	37248008	39759432	36264476	38721760	40731944	38307036	37970164	38845404
L-Arginine	23.4249	174.112	62259776	77739592	63417660	40782212	103687680	86831896	49849284	53702004	160498368	150315808	153788768	157872080	154197216	150323088	151393616	156254064
L-Asparagine	15.2889	132.054	14775496	16551429	15327599	12966226	20965748	18697200	13842554	15531930	38861204	39523032	39449776	37481116	35880308	35821760	36593748	38663424
L-Aspartate	14.8993	133.038	13933221	13222797	11335311	11173170	21957730	20131544	16051433	15768028	88676648	105385464	91239464	93997520	96112568	100974688	88354744	89374240
L-Aspartate 4-semialdehyde	10.5892	117.043	416094	253047	366044	260514	364986	303689	408550	288753	40807.4	50961.7	56409.6	31323.8	43015.4	45251.2	35449.8	52528.8
L-beta-aspartyl-L-alanine	15.3826	204.075	656499	346846	602732	381769	772439	463381	665645	545233	40852.8	52228.6	52897.4	48528.5	46218.3	46728.8	58078.4	57996.8
L-beta-aspartyl-L-asparticacid	17.1063	248.065	2.94736e+06	1.57625e+06	3046503	2.26369e+06	2617494	2.55012e+06	2.95976e+06	2.82965e+06	28886.8	24462.8	31269.2	27930.2	32088.1	42226.8	32494.7	32071.8
L-beta-aspartyl-L-glutamicacid	14.2811	262.08	858255	196790	1.017e+06	798163	657504	584604	1.20188e+06	1.04361e+06	0	0	0	0	0	0	0	0
L-beta-aspartyl-L-leucine	13.0803	246.122	147834	66162.5	216639	142018	193755	135096	199450	173301	0	0	0	0	0	0	0	0
L-beta-aspartyl-L-threonine	15.3828	234.085	277701	170914	267675	194200	319480	264231	334745	270425	36586.6	60866.9	34830.8	37482.4	47653.4	39505.4	40141	39389.9
L-Carnitine	13.354	161.105	11818961	8.13567e+06	16119948	12140695	14131388	11726319	14968822	14579005	2.47224e+06	2.4657e+06	1.9361e+06	2.30945e+06	2.13727e+06	2.13665e+06	2.01323e+06	2.09916e+06
L-Citrulline	15.881	175.096	1.1888e+06	955925	1.30191e+06	1.01258e+06	1623406	1.30683e+06	1.05952e+06	1.12845e+06	3.34985e+06	3.21454e+06	3.41494e+06	3.17188e+06	3.40171e+06	3256329	3.43281e+06	2.97256e+06
L-Cysteate	15.3213	169.004	265202	231493	267867	177309	394311	252728	219790	157687	81008.5	85573	88143.8	52596.1	88742.1	21595.8	45022.8	30332.1
L-Cysteine	14.2175	121.02	1.88177e+06	2061069	913888	189711	1705462	710405	935219	424131	74644.6	48096.5	51506	42241.5	33139.8	78567.7	46912.2	28424.2
L-cysteine sulfinate	14.2081	153.01	0	0	0	0	0	0	0	0	164797	257278	185765	168499	215799	107418	127239	114775
L-Cysteinylglycinedisulfide	15.1475	297.045	50275.2	212490	0	0	22564.5	54379.7	0	0	3103700	3.51624e+06	3.80341e+06	3.44288e+06	4.18502e+06	3.52124e+06	3.8446e+06	3.67549e+06
L-Cystine	16.2164	240.024	204347	445587	59782.2	0	150289	120943	38401.8	0	56120004	59736256	56487592	57736276	58681408	60033460	54625964	54932968
L-Djenkolic acid	16.0574	254.039	0	0	0	0	0	0	0	0	1.21008e+06	1.08462e+06	1301253	1.23359e+06	1141135	1.10389e+06	1.27024e+06	1.26421e+06
L-Dopachrome	19.4756	193.038	137226	102189	149703	119636	176144	126106	146061	111637	0	0	0	0	0	0	0	0
Leu-Pro	13.0898	228.147	292648	222092	265466	263822	419365	281334	384931	296998	64529.9	69764.6	72434.7	32484.7	42131.3	78182.7	83662.2	65969.6
L-Formylkynurenine	10.1543	236.08	7.50415e+06	4.51563e+06	5807726	6277531	6.3774e+06	5398421	4337336	4823419	1.19889e+06	1.29791e+06	1.4772e+06	1.19792e+06	1.26745e+06	876313	1.08844e+06	1394578
L-Fucose 1-phosphate	13.8778	244.035	842219	322640	803521	589646	807050	712894	879410	1.061e+06	0	0	0	0	0	0	0	0
L-gamma-glutamyl-L-isoleucine	11.5149	260.137	425821	280109	440594	434387	664707	406062	408757	385522	53767.2	45452.7	69370.4	44251.1	71257	65010.5	44613.8	65304.8
L-Glutamate	14.661	147.053	268916448	233935616	262200880	214844064	284350080	280404192	263762992	240216784	60515496	68198752	67775992	60679392	66747312	63095668	64963148	63414200
L-Glutamate 5-semialdehyde	14.5104	131.058	62349236	42493188	62995848	47973284	61883732	70745376	49306520	56216808	183722688	199159936	177857520	179373632	197180016	187955472	180108480	181859392
L-Glutamate methylester	9.37775	161.069	7417078	3.67288e+06	6.81721e+06	4617975	8255780	6.32673e+06	7659645	5.52927e+06	148260	138844	156323	163462	153686	166092	192678	189292
L-Glutamine	15.0977	146.069	140537504	170871232	146947696	140265088	174718848	179938048	127920400	163490176	728042624	752722816	705765952	719085824	749120064	755444096	735440832	695162368
L-Glycericacid	12.7175	106.027	99258.5	75286.3	133375	79648.3	126260	118117	92170.6	79366.3	5938.5	8925.9	0	10205.6	9182.67	0	0	9063.89
L-Histidine	14.6758	155.069	48043160	44108496	50262096	36898756	60449744	56648348	41903172	42963928	129479744	144354304	136432400	124494664	136259440	131822392	118072904	125381856
Linatine	12.9311	259.117	0	0	0	0	0	0	0	0	272288	310424	277035	345690	265362	370887	172153	208249
L-Indospicine	21.7674	173.116	0	0	0	0	0	0	0	0	44917.7	75824.4	55781.2	73797.7	45168.8	91938.8	40794.2	69495.5
Linoleamide	4.32755	279.256	542856	559690	414435	799002	520324	818012	706778	686004	1202019	1.6199e+06	1685780	1.36343e+06	1.55754e+06	1.152e+06	1.57163e+06	1.12834e+06
Linoleate	3.96641	280.24	11328504	19373064	5.9129e+06	13437336	14233236	19785464	19474370	18047624	16465032	17103842	29092048	9708342	23230118	13153736	12212897	18974594
L-isoleucyl-L-proline	10.2893	228.147	657620	442303	690606	634106	858485	696056	817604	755464	148725	158898	149072	173269	157972	184440	157047	154856
L-Kynurenine	10.9037	208.085	5889304	5.14673e+06	8090301	5849443	9170931	8617301	5938898	5997033	5.74307e+06	6.86289e+06	6816857	5657132	6778161	4591937	5657925	6.36535e+06
L-lactide	5.32885	144.042	102324	70050	85532.3	114049	130067	81553	74318.2	106883	0	7205.02	8661.64	13654.7	8396.66	7762.39	6685.7	10598.8
L-Leucine	10.9306	131.095	12625667	12293489	14215871	8927845	21241190	17605172	14082652	12881407	29032960	30958332	29310416	28934816	30453830	31199356	27715708	28420812
L-Lysine	22.5367	146.106	3647434	5921536	4.1266e+06	2.31234e+06	8404113	7.29919e+06	3.23782e+06	3565908	16594660	17779804	16421350	16496948	17496172	18950046	16712292	16204045
L-Methionine	11.6144	149.051	47359096	46245104	53006480	37066304	76057024	57897024	53354280	46771720	90556872	104027896	87811576	88157952	95135560	94791520	92323976	91666328
L-Methionine S-oxide	13.6461	165.046	535458	364505	517234	373619	665517	626230	515586	532188	4.34527e+06	4431155	3.79689e+06	4850856	4107676	3.81151e+06	3.80121e+06	3.64316e+06
L-Ornithine	21.87	132.09	1.34552e+06	1.98552e+06	1522658	902431	2.56116e+06	2.13993e+06	1.08492e+06	1.29702e+06	3.30691e+06	3.6191e+06	3.28208e+06	3018666	3381933	3.43576e+06	2.90025e+06	3.43795e+06
L-Phenylalanine	10.2906	165.079	42307648	38123140	45431844	31255858	60848828	52075876	40981652	42619304	73283912	87938040	69502232	72831264	79495360	76507248	74362096	88856104
L-Proline	12.8287	115.063	387672640	251334112	425238848	258622736	370646496	296611136	387508672	298100096	241051264	240625472	279940864	243319104	244203488	245476592	249611456	219745920
L-Pyrrolysine	7.57793	255.158	101850	99795.1	87081.5	94444.5	144902	109589	88294.4	96141.8	212926	276726	237375	217650	277953	205597	249429	209045
L-Rhamnono-1,4-lactone	14.6675	162.053	1.3424e+06	1.08734e+06	1.01222e+06	859402	2.06593e+06	574335	419936	520296	2023306	2648293	1.73832e+06	2.02337e+06	2147340	2368921	1.67621e+06	2.03754e+06
L-Serine	15.7519	105.043	2.29555e+06	3.08087e+06	2182549	2.0414e+06	3487818	3.65929e+06	1.71205e+06	2.14955e+06	9500574	11499158	8508380	9253650	10119775	10535341	8384217	9931448
L-Threonine	14.5465	119.058	931528	809795	1.0152e+06	675229	1.15197e+06	975997	949645	819588	7395865	8422191	7.48691e+06	7.4174e+06	8.07522e+06	8.13051e+06	6.76831e+06	7.50199e+06
L-Tryptophan	11.6481	204.09	6298447	6.40971e+06	6598966	4836120	11113393	8554169	7.10891e+06	6.56122e+06	8070226	11497365	7348767	7.67858e+06	9990355	9133501	9918568	9750422
L-Tyrosine	13.0848	181.074	17216780	15037364	19062592	10979304	29723354	23112288	17664136	17681556	78621352	83715080	77810520	74527864	89454576	85795440	74927944	79830608
L-Valine	12.5915	117.079	22049162	22690594	23180270	18182026	38090168	32293292	22919078	21557932	41008492	41002296	38604224	42856400	45066228	41463400	38033416	43442464
Lys-Asn	14.7676	260.149	1.27259e+06	937282	1.25458e+06	1.21518e+06	1.47111e+06	1.21407e+06	995826	1062845	0	0	0	0	0	0	0	0
Lys-Lys-Lys-Trp	12.1949	588.375	223449	142857	251948	204969	256563	226384	288419	260013	212757	214293	224588	226399	242094	248099	236036	241647
LysoPC(16:0)	4.85843	495.333	8.03895e+06	3.14182e+06	6958147	10550660	7.77933e+06	7862030	10174944	15275779	68993.4	118266	83514.8	57841.1	116204	73149.8	94567	94734
LysoPC(16:1(9Z))	4.92168	493.318	4.83613e+06	2.89955e+06	4.4828e+06	5329677	4.5215e+06	4.12593e+06	5712184	6.77938e+06	0	0	0	0	0	0	0	0
LysoPC(18:0)	4.73282	523.363	455957	273403	271373	420562	341865	331966	471812	963266	0	56315.1	65414	50123.6	93725.9	54254.3	71911.8	70484.4
LysoPC(18:1(9Z))	7.62394	521.348	1.31575e+06	583275	1.0373e+06	1.34481e+06	1.12832e+06	869944	1.16794e+06	2949106	0	0	0	0	0	0	0	0
LysoPC(18:1)	4.76851	521.348	3126249	1.60885e+06	2.07355e+06	2.71151e+06	2.19576e+06	1.96628e+06	3301900	6.18838e+06	0	40500.1	0	0	41587.2	0	35869.2	38037.9
LysoPE(16:0)	4.90015	453.286	314251	316797	297742	489772	218669	277132	356462	675544	0	0	0	0	0	0	0	0
LysoPE(18:1)	4.76975	479.302	111197	281222	139077	144351	138577	106707	154582	270987	0	0	0	0	0	0	0	0
Lys-Val	21.8226	245.174	3.69383e+06	2.66568e+06	4224722	2.86165e+06	5.42084e+06	3.39625e+06	4.82185e+06	4.04788e+06	39137.3	43116	35744.6	36138.5	43929.2	40045.3	35106.9	43767.6
Maleamate	14.6667	115.027	1.53581e+06	3717346	1.51858e+06	1.21189e+06	2086984	1.92942e+06	1.71229e+06	1.57216e+06	628696	743783	653643	651030	628736	697909	635908	627557
Maleic acid	14.6331	116.011	744230	1455732	606820	547170	755971	693629	654140	601683	1.22532e+06	1.49755e+06	1.37399e+06	1.41088e+06	1.35685e+06	1.43396e+06	1.23754e+06	1.26556e+06
MES	14.4224	195.057	0	0	0	0	0	0	0	0	142717	151966	191636	144244	199026	152020	138622	142362
Mesaconate	12.2396	130.027	276814	156998	215594	238378	228752	222006	240001	251741	31031.2	31672.2	29599.5	33040.4	31147.7	19927	57135	22982.6
Mesitylene	4.675	120.094	513019	448864	730501	425341	434074	400417	392470	395672	110504	64895.4	62250.7	40527.4	62061.2	82082	82232	52105.5
meso-2,6-Diaminoheptanedioate	14.3082	190.095	1.03521e+06	78140.8	882448	1041282	711001	725404	1.56319e+06	1.33573e+06	75526.9	59314.3	116914	64004.2	120693	76654.3	120148	129719
Met-Asp-Pro	14.3295	361.131	0	0	0	0	0	0	0	0	1.05188e+06	1.23013e+06	932596	1.03026e+06	1.1029e+06	1.19143e+06	940508	1.02057e+06
Met-Cys-Cys	17.8153	355.069	292270	223865	324641	446550	313367	269762	238637	236734	0	0	0	0	0	0	0	0
Methacholine	13.3917	159.126	626478	465786	769423	549969	715585	527841	731298	628744	85075	102967	87750.8	100295	75229.5	117426	92207.6	96706.4
methanofuran biosynththesis intermediate MF1	16.6936	355.991	89862.9	78965.1	131421	75864.1	77501	31894.5	72703.3	85311.2	0	0	0	0	0	0	0	0
methionol	4.93223	106.045	0	0	0	0	0	0	0	0	197452	174354	184112	197914	328061	250999	144381	233812
Methomyl	13.1344	162.046	683171	966785	415625	54219.5	816258	404153	321116	188901	38398.8	0	46097.2	46295.2	50475.1	44871.9	27537.8	36314.7
methyl pyruvate	5.16364	102.032	526007	407913	509344	602286	606343	654515	572281	505545	0	0	0	0	0	0	0	0
Methyl5-(but-3-en-1-yl)amino-1,3,4-oxadiazole-2-carboxylate	10.245	197.08	650941	333373	659574	517014	973138	827518	1.09544e+06	954296	38412.5	35498.3	29275.3	29910.1	52079.7	43073.1	31853.4	43142
Methylenediurea	11.4894	132.065	293272	157794	237348	170029	264534	257432	260671	213370	56613.1	54519.9	120461	0	94251.5	54934.8	90944.8	63268.4
Methylimidazoleacetic acid	9.5651	140.059	213244	128312	209606	144293	236632	224633	210911	149544	204597	167527	161279	173003	186864	216007	168222	172504
Methylmalonate	13.5361	118.027	470099	321989	402052	427690	641991	395883	505687	452810	71499.9	59505.6	63497.8	50881.7	80872.3	53776.4	53407	70461.4
Methylripariochromene A	4.55023	250.12	501964	399892	316175	359124	430698	370793	383857	490193	0	0	0	0	0	0	0	86409.5
Met-Met-Met	14.2566	411.132	1.11851e+06	302800	1477510	1.1368e+06	969801	641029	1.35798e+06	1.60329e+06	0	0	0	0	0	0	0	0
Met-Phe-Gly	11.6349	353.141	125895	71657.9	106807	37746.5	204693	144068	99131.3	50998.5	106724	282761	141056	183474	232875	191422	191669	226045
MG(0:0/14:1(9Z)/0:0)	4.95287	300.23	349429	278030	345246	361262	372648	353555	356275	418250	0	8464.21	0	0	0	0	0	0
MG(0:0/16:0/0:0)	4.16616	330.277	183679	0	120068	191339	0	235062	138955	0	3.39901e+06	3.64631e+06	2.0894e+06	928875	2.75111e+06	6.99339e+06	969466	1.75452e+06
MG(0:0/16:1(9Z)/0:0)	4.49788	328.262	171218	139945	150605	137536	165131	152390	147398	164402	0	0	0	0	0	0	0	0
Miroestrol	14.5755	358.142	0	0	0	0	0	0	0	0	236433	247616	182644	223614	217308	202200	219507	231122
Miserotoxin	16.8419	267.095	1.63438e+06	1.20008e+06	1.73858e+06	1.52353e+06	1.97302e+06	1525461	1.88819e+06	1697475	0	0	0	0	0	0	0	0
Muramic acid	14.56	251.101	2.37865e+06	2.08139e+06	2.22008e+06	2.0184e+06	2.52348e+06	2007923	1.83817e+06	1.98279e+06	0	57378.2	0	0	0	0	0	83047.4
Myrtillin	3.97583	465.104	0	0	0	0	0	0	0	0	396014	480160	339653	329243	542251	487103	262328	263454
N-(2,3-Dihydroxybenzoyl)-L-serine	19.4747	241.059	413388	298888	434445	335478	483906	345990	426425	337867	0	0	0	0	0	0	0	0
N-(3-hydroxybutanoyl)-L-homoserine	7.69829	205.095	1.18978e+06	943809	1.0615e+06	1.22323e+06	916392	1.1297e+06	1.01562e+06	1.32004e+06	0	0	0	0	0	0	0	0
N(pi)-Methyl-L-histidine	12.5351	169.085	2.15598e+06	1.83772e+06	2225102	1.54171e+06	3.13416e+06	2.48711e+06	2.25409e+06	1.81548e+06	6.35395e+06	6030974	5696256	5715417	5511547	5.71832e+06	5795337	5475574
N,N-dihydroxyisoleucine	7.74186	163.084	629735	411039	335919	464838	621843	351678	382563	316032	0	0	0	0	0	0	0	0
N,N-dihydroxyvaline	10.0306	149.069	275298	121055	182154	162437	377679	181006	143815	141956	27399.8	121326	75214.8	31548.9	113997	61618.5	32895	176798
N,N-Dimethylaniline	5.05847	121.089	166294	141974	173907	141100	173808	133795	177211	172904	106466	52405.4	74931.2	54323.4	34603.5	97288.7	42267.5	43167.8
N,N-Dimethylglycine	14.1107	103.063	562090	199534	335944	432052	223854	224120	332457	298258	1.08235e+06	1.20059e+06	966783	1.00174e+06	1.12073e+06	948606	1.1138e+06	1.12614e+06
N,N'-Dimethylurea	14.4228	88.0635	177542	167095	139121	169299	186282	93764.8	137479	177325	0	0	0	0	0	0	0	0
N2-(D-1-Carboxyethyl)-L-arginine	14.1709	246.133	627420	256082	773929	445591	528841	450442	772456	691388	402330	375902	524172	390001	498510	437887	439542	457615
N2-Acetyl-L-aminoadipate	11.8532	203.08	1.46964e+06	743258	1.73506e+06	953580	1.5523e+06	1.24871e+06	1.55547e+06	1332577	143439	141398	137032	155777	136720	175890	139006	135129
N2-N2-Dimethylguanosine	8.87074	311.123	310162	243954	344904	203946	458119	297560	371286	339677	224366	185328	255957	201400	254649	248664	327708	251934
N3-(4-methoxyfumaroyl)-L-2,3-diaminopropanoate	8.54485	216.075	149302	81754.4	150544	77269.1	117945	94569.3	84260.4	53346.6	30168.2	47803.7	30570	37816.7	36398.8	40781.2	37254.7	45036
N4-(Acetyl-beta-D-glucosaminyl)asparagine	14.7101	335.133	0	0	0	0	0	0	0	0	5051169	5.56902e+06	4497329	5.23221e+06	4.99359e+06	5.78207e+06	4369627	4623728
N4-Acetylaminobutanal	7.76919	129.079	1.99884e+06	919360	1.08281e+06	963959	2.12186e+06	909289	1.46464e+06	1.30772e+06	38358.2	39537.2	28462.1	32479.7	33004.8	105589	47173.1	32190.8
N4-Acetylcytidine	8.49385	285.096	216524	158836	297292	186162	330418	222831	269306	255187	104138	86980.6	82145.3	85472.5	99913.6	87997.6	106554	86462.8
N6-(1,2-Dicarboxyethyl)-AMP	17.9329	463.075	113787	133872	156021	111745	102077	101351	130403	90851.4	0	0	0	0	0	0	0	0
N6,N6,N6-Trimethyl-L-lysine	21.3639	188.153	1.60617e+06	1344657	1921867	1.19651e+06	2325895	1.69005e+06	1804962	1.53814e+06	724576	755497	790561	735681	837778	737260	744891	738811
N6-Acetyl-L-lysine	12.9204	188.116	261564	169802	293282	172045	323117	235163	242937	254401	301872	256343	319768	278943	322902	278591	290446	331401
N6-Acetyl-N6-hydroxy-L-lysine	10.988	204.111	248370	281408	307577	214547	472623	568574	225425	301111	0	0	0	0	0	0	0	0
N6-Methyl-L-lysine	22.0947	160.121	1.68933e+06	1.32273e+06	1.8775e+06	1.29478e+06	1.93267e+06	1.38603e+06	1.86524e+06	1.93867e+06	119238	117116	95920.7	105962	97113.5	132572	101828	106783
N-Acetyl-a-neuraminicacid	15.9119	309.106	0	0	0	0	64309.6	0	0	0	171079	220471	211459	203918	210191	255796	193785	184774
n-Acetylasparagine	11.3146	174.064	133902	99895.9	131181	85707.1	139848	114317	126328	93182.7	22312.1	23437.3	14521.1	32947	13422.9	14161.4	13599.2	20148
N-Acetyl-aspartyl-glutamate	16.4546	304.091	25732548	23358410	24977086	21538458	22227950	23701000	23220912	19189418	81195.3	92885.9	98402.9	73684.2	98630.5	89799.6	92215.8	93878.2
N-Acetyl-beta-alanine	8.92271	131.058	4.86152e+06	2.51634e+06	3.72317e+06	2.97053e+06	3.763e+06	3.02698e+06	4382759	3.66733e+06	278167	222763	371419	223254	288891	257128	347972	243233
N-acetyl-demethylphophinothricin	10.3059	208.062	155323	161654	132797	129728	168410	126102	165520	173033	275994	181786	231894	226408	147823	242852	169069	193340
N-Acetyl-D-fucosamine	12.2174	205.095	9563152	3.89384e+06	8677510	5884844	8724570	6089815	9099765	8.37272e+06	95340.9	106163	86629.9	80585.4	123867	148448	148042	87106.6
N-Acetyl-D-glucosaminate	14.1221	237.085	0	0	0	0	0	0	0	0	286580	742879	326160	284480	378350	517336	231015	361642
N-Acetyl-D-glucosamine	11.8544	221.09	919908	548720	1.07826e+06	593708	925375	784783	1.01079e+06	829841	132630	124630	124222	91017.7	119852	112063	130721	95092.5
N-Acetyl-D-mannosaminolactone	13.8227	219.074	2.37116e+06	1.02214e+06	2.65052e+06	1.76306e+06	2587641	1.84966e+06	2951937	2.32764e+06	28279.7	32011.1	30797.4	25266.8	40773.1	23957.6	30187.9	33405.5
N-Acetyl-D-quinovosamine	8.16717	205.095	2376313	1.98387e+06	2.09927e+06	2.58976e+06	2.29329e+06	1.99022e+06	2.39085e+06	2.79998e+06	0	20960.9	0	0	0	24362.5	26005.4	23342.5
N-Acetylglutamine	10.7731	188.08	192878	135592	194036	116670	230962	165637	187794	129884	27954.9	34181.9	39784.9	29717.5	37348.9	39456.9	29939.2	37826.1
N-Acetyllactosamine	13.8473	383.143	287599	211537	390779	283925	434088	245926	326415	330510	0	0	0	0	0	40693	0	0
N-Acetyl-L-aspartate	14.4992	175.048	250551776	477480160	245918704	186375216	300597632	257112624	257765232	232020016	3972185	4.34672e+06	5.1898e+06	3.99062e+06	5.49296e+06	4.95941e+06	5.19739e+06	5.2229e+06
N-Acetyl-L-citrulline	12.3414	217.106	1.25679e+06	1.38701e+06	1.86041e+06	1.66719e+06	3.15455e+06	2.82254e+06	942024	1.12257e+06	374051840	360039104	368811840	375558208	327520256	378043456	314560896	262044896
N-Acetyl-L-glutamate	14.1067	189.064	29519958	9005987	28128746	23041204	20554890	19980566	33079650	29403862	330878	311663	405765	288342	334123	326592	398131	349817
N-Acetyl-L-glutamate 5-semialdehyde	7.79441	173.069	7.71153e+06	3.50828e+06	10995702	8312901	4995068	6402433	6405595	7.55298e+06	0	16995.3	19027.7	0	0	0	23648	16254.7
N-Acetyl-L-histidine	8.95012	197.08	898689	878883	773876	502042	1.29334e+06	962774	739843	646226	2.52767e+06	2837493	2.69126e+06	2.23911e+06	2.83925e+06	2.43347e+06	2.28654e+06	2.17131e+06
N-Acetylmethionine	7.66828	191.062	5.79918e+06	3.84295e+06	6.06716e+06	4.0341e+06	5818336	4996758	5.41147e+06	4484511	0	0	0	0	116389	0	0	0
N-Acetylmuramate	13.4072	293.111	0	0	0	0	0	0	0	0	349160	640799	401237	487767	400834	593494	380785	404254
N-Acetylneuraminate	13.2836	309.106	1.04369e+06	506967	1.17991e+06	776940	971015	864190	1.01358e+06	863455	72397.4	103977	101119	64966.8	101316	80788.8	97345.5	95330.2
N-Acetylornithine	13.6382	174.1	201071	177318	181303	116661	224179	221567	172096	160393	1.30753e+06	1.57133e+06	1.32919e+06	1.3788e+06	1.31898e+06	1.42689e+06	1.32785e+06	1.34909e+06
N-Acetylvanilalanine	8.04414	253.095	258011	162293	298317	255634	225151	205852	267758	235842	0	0	0	0	0	0	0	0
NADH	13.5556	665.125	18602460	4.62518e+06	18164450	10126211	15752407	9948865	18281804	14356594	0	0	0	0	0	0	0	0
NADP+	16.5793	743.076	4.52415e+06	10908910	4.69185e+06	5179270	5735885	4965024	5372455	4.4863e+06	0	0	0	0	0	0	0	0
NADPH	16.8312	745.092	8931266	493125	10587961	10011028	12453188	8668181	10930705	11026609	0	0	0	0	0	0	0	0
Nalpha-Methylhistidine	13.2078	169.085	0	0	21082.7	0	25793.8	21183.5	36403.4	46321.4	238017	277166	249910	244932	268077	256398	253320	254877
N-Amidino-L-glutamate	10.2966	189.075	173929	200527	171954	165372	246588	209420	158936	229123	323013	402922	350412	331572	351414	420574	323179	329785
N-Carbamoyl-L-aspartate	16.4347	176.043	903021	816129	688162	696244	459945	455770	508459	448106	0	0	0	0	0	0	0	0
N-Carbamyl-L-glutamate	9.81131	190.059	708774	501056	705425	565879	802601	671188	855384	692204	15071.1	14872.6	15831.2	13613.8	16629.1	23377	19851.4	18590.5
N-Carboxyethyl-g-aminobutyricacid	9.82289	175.085	326596	290014	264448	88648.6	283782	181287	195475	173147	71105	46612.4	57171.2	34971.6	77362.6	40329.4	34052.6	55436.7
N-Decanoylglycine	4.95249	229.167	500627	588615	1.69125e+06	580508	1.02297e+06	913879	615073	978496	314004	351065	1.17026e+06	291191	724325	634650	249403	386462
N-dimethylethanolamine	16.0228	89.0841	0	0	0	38380.3	0	0	40357.7	179797	14954	0	0	0	0	0	0	0
Ne,Ne dimethyllysine	21.048	174.137	212753	214907	265569	172366	345365	256890	245361	223461	236565	268852	247457	249280	227089	283248	281767	244507
N-eicosanoyl-ethanolamine	4.81952	355.345	72081.1	80682.1	0	0	507519	0	0	0	135127	146976	35982.6	1.2341e+06	87369.4	29021.5	505175	70758
Neuraminic acid	14.1417	267.095	0	0	0	0	0	0	0	0	142977	229306	120928	165113	167709	184079	153378	161183
N-Formiminoglycine	12.0305	102.043	139782	112472	160245	117473	139069	119233	101135	122379	36856	59192.8	38981.2	33108.1	39238.6	50255.8	59006.3	38299.8
N-Formimino-L-glutamate	11.8981	174.064	711281	403255	694323	417081	689602	494784	652434	550106	42244.5	34918.7	58555.7	25129.3	0	0	0	35003.1
N-Formyl-L-methionine	7.67803	177.046	3688433	1.98338e+06	3.92389e+06	2.85671e+06	3.84814e+06	2.83221e+06	3586996	3.45019e+06	316734	211588	370609	265035	225515	368639	366557	248566
NG,NG-Dimethyl-L-arginine	21.0838	202.143	1.29944e+06	1.14823e+06	1.59503e+06	896728	2.09327e+06	1547258	1.3726e+06	1.28633e+06	1.72957e+06	1.92227e+06	2.04341e+06	1.91062e+06	2.12554e+06	2.08781e+06	2.16478e+06	1.99948e+06
Ngamma-Monomethyl-L-arginine	23.6815	188.127	37744.2	34958.4	30904.4	18099.3	50038	46398.9	26439.1	36074.8	112863	125283	135565	137362	124834	156686	129013	121899
N-Glycoloyl-neuraminate	14.3394	325.101	0	0	0	0	0	0	0	0	80756.3	107197	87245.6	113264	120837	111453	104915	108198
N-Glycolyl-D-glucosamine	16.1463	237.085	865714	501802	717225	636555	811530	751194	832275	724345	0	0	0	0	0	0	0	23683.2
N-Glycosyl-L-asparagine	14.5155	294.106	2581464	2.19374e+06	2534216	2.09755e+06	2.6353e+06	2.42556e+06	2.41776e+06	2.04964e+06	995215	1671151	893184	1.14526e+06	1.26434e+06	1.28863e+06	834550	1.20168e+06
N-Heptanoylglycine	5.20276	187.121	1135279	1.60264e+06	1.2759e+06	1.32152e+06	1.5678e+06	1.05177e+06	1.15772e+06	1.14695e+06	210244	225229	264906	208021	291934	303569	247098	240369
N-hydroxy DAP	12.8587	206.09	128121	32583.3	133090	84607	103758	83131.2	137362	103243	0	0	0	0	0	0	0	0
Nicotinamide	7.72211	122.048	33599280	38626808	34662692	25848648	38613640	37173096	29690144	38028244	56016724	57216992	49588564	51553784	51307888	51587952	49718892	52360728
nicotinamide riboside	22.2345	254.09	315191	108720	541033	364790	346261	275067	486386	489328	0	0	9784.81	8839	12408.8	9956.52	8052.82	10590.2
N-Lauroylglycine	4.65041	257.199	70818.7	33618.1	176016	79794.7	79341.3	85387	62601.9	126499	27897.7	38535.9	72878.7	11118.7	36473.3	50348	22940.8	31845.6
N-Methylethanolamine phosphate	14.9549	155.035	1291984	1.27645e+06	1777467	1.13608e+06	1.60208e+06	1.48677e+06	1.55091e+06	1.38588e+06	0	0	0	0	78528.7	0	0	0
N-Methylhydantoin	12.6411	114.043	232751	148258	192303	148290	262770	190739	233799	207490	0	0	0	0	0	0	0	0
N-Nonanoylglycine	7.66636	215.152	483029	753231	1.16072e+06	521401	740841	602874	455108	704527	237491	236801	610348	306649	321458	374719	293170	240710
Nonanoyl-CoA	3.84011	907.235	0	0	0	0	0	0	0	0	6489067	6.94896e+06	5.60016e+06	4587786	6826953	3.81428e+06	2.85614e+06	1.73132e+06
nonulose 9-phosphate	16.883	350.062	782379	587217	990170	662415	906530	627120	891681	732831	0	0	0	0	0	0	0	0
Norepinephrinesulfate	18.5588	249.031	8239916	5.89191e+06	6815013	2.07002e+06	7.91369e+06	6241502	5707400	2892391	0	0	0	0	0	0	0	0
Novobiocic acid	13.3094	395.136	429592	229052	620420	349296	497580	317051	502064	531814	0	0	0	0	0	0	0	0
N-succinyl-L-citrulline	8.29668	275.112	2.1433e+06	2.20882e+06	1.97944e+06	2.04508e+06	3.14038e+06	4.06804e+06	1.04317e+06	1.21525e+06	0	0	0	0	0	0	0	0
N-Succinyl-LL-2,6-diaminoheptanedioate	12.4512	290.112	2156253	1.50062e+06	2183110	396775	2891680	1355823	1.08181e+06	403664	0	0	0	0	0	0	0	0
N-Succinyl-L-L-2-6-diaminopimelate	13.8954	290.112	0	0	0	0	0	0	31923.3	28554.9	128399	186939	136330	120013	155962	179488	120415	166879
O-Acetylcarnitine	11.1092	203.116	1237380	953782	1.33737e+06	1.0814e+06	2.13591e+06	1.04524e+06	1.63936e+06	955438	105101	0	0	0	114825	0	0	0
O-Acetyl-L-homoserine	11.1486	161.069	448982752	411242144	361025408	120368032	434204512	341210944	310737856	208323072	112711	157453	164446	162659	179921	197675	132377	185851
O-Acetyl-L-serine	10.5055	147.053	10955987	6.76325e+06	12057736	8607335	10522552	8903651	12287101	10049713	264044	261111	401180	264524	359938	303329	333810	328181
O-Acetylneuraminic acid	14.8061	309.106	614220	444797	678038	457827	892502	1.08195e+06	641360	653813	0	0	0	0	0	0	0	0
O-beta-D-Glucosylzeatin	12.9371	381.164	0	0	0	0	0	0	0	0	282797	320984	256620	309324	220596	297790	178639	169502
O-Butanoylcarnitine	8.88779	231.147	4.01675e+06	2646691	3.76386e+06	2985931	3.24242e+06	2.66363e+06	3675271	2.86565e+06	414414	375092	389566	316217	416971	381181	347486	294806
Octadecanamide	4.27309	283.288	462928	433473	349178	622244	435474	831422	568465	785268	1.28814e+06	1.00629e+06	1.5077e+06	702475	1.2826e+06	627506	1.05747e+06	937307
Octadecanoic acid	3.94496	284.272	163672784	238018240	117687432	228005664	196109280	260124608	226562496	232377520	181110752	197398816	309263200	119642680	289730304	150276784	157597840	202901968
Octane-1,8-diol	5.01993	146.131	0	0	0	0	0	0	0	0	225213	234962	215858	236741	220473	472526	154173	197015
octulose 8-phosphate	16.5662	320.051	1068696	746104	1.23336e+06	991800	1.26578e+06	892020	1.10605e+06	1.02631e+06	0	0	0	0	0	0	0	0
Octylamine	13.752	129.152	909271	863582	1.18054e+06	2899108	792655	1.42858e+06	1.24793e+06	1.53448e+06	290782	280902	427137	247282	381487	309759	304364	264957
O-Propanoylcarnitine	9.92189	217.131	4.6754e+06	2702923	5772468	3.42568e+06	5774421	5027160	6.49375e+06	5891587	486183	502248	527915	550913	498838	555445	499177	571442
Orotate(Fragment)	12.8928	112.027	424513	135161	464324	287558	297801	275026	471022	359105	17760.8	22642.3	15338.1	14920.4	18490	18538.2	16075.3	16865.3
Orotidine	12.7973	288.06	3.73389e+06	827043	3.49689e+06	2261078	2.55328e+06	2.31815e+06	3679643	2846719	0	0	0	0	0	0	0	0
Orthophosphate	15.3167	97.9769	30198556	25151516	31837038	23942864	34732168	28302752	34297488	30214680	21996038	22900922	23860048	22247718	19434378	23911646	21497236	23670214
Oxalate	17.2857	89.9953	190467	242004	162010	192308	190727	204450	174850	161201	236100	246654	251919	236636	261667	241122	247273	233255
oxindole-3-acetyl-aspartate-N-beta-glucosyl-beta-1,4-glucose	15.1553	630.191	0	0	0	0	0	0	0	0	190820	213221	225525	233153	207967	212243	195517	243229
Oxoamide	7.81338	192.09	1.19811e+06	152181	1.29334e+06	978933	1.50949e+06	1.15732e+06	1.11339e+06	925761	45726.8	54566.4	70491.9	62813.6	62392.3	60717.2	60374.4	83618.3
PA(P-42:4)	4.3527	764.572	799153	3.11893e+06	705465	698555	1.25094e+06	685753	1.26007e+06	2.82815e+06	287522	275510	240388	261197	304990	240884	274393	257521
Palmiticamide	4.37909	255.256	317259	255442	291778	523669	403730	573702	433531	453984	668254	644819	827193	970474	818512	495694	688877	727098
Palmitoylglycerone phosphate	4.93649	408.228	110573	73174.2	89430.9	104812	92370.3	104216	120543	152069	0	0	0	0	0	0	0	0
p-aminobenzoate-β-D-glucopyranosyl ester	16.6153	299.1	58384.8	162788	57403.9	42332	154368	174718	0	43468.3	361562	434711	351328	358454	431690	398131	424688	388604
p-aminobenzoyl glutamate	14.078	266.09	0	0	0	0	0	0	0	0	144451	205737	148711	160679	200084	152344	169492	165029
Pantothenate	8.73737	219.111	57478944	38215556	52890584	32806882	54484172	39440420	49553588	42352180	7449044	8865369	7.64671e+06	7.44878e+06	8339725	8052134	7.23094e+06	7524457
Pantothenol	11.7228	205.132	191124	216827	232895	226254	185058	232828	202418	170358	33843.3	25963.1	44553.9	23132.8	28167.9	43689.6	26373.9	40097.9
PC(15:0)	4.94666	481.317	331020	143294	335597	423651	369572	343278	446130	587571	0	0	0	0	0	0	0	0
PC(32:1)	4.15112	731.546	2.12353e+06	32716914	1.78545e+06	945800	3771900	1600484	2.00617e+06	3.91923e+06	125608	314160	227890	126516	252956	129185	193857	347842
PC(34:1)	4.11253	759.577	1.9975e+06	31146694	2.02088e+06	937479	4162094	1.88027e+06	1661189	3.07329e+06	1032656	1636149	1.1912e+06	1.07787e+06	1.51596e+06	1.0932e+06	1.37072e+06	1498321
PC(34:2)	4.12641	757.561	1.55145e+06	29330868	1.28615e+06	552563	3.00612e+06	1.2825e+06	1.28813e+06	2.39957e+06	145570	315853	234868	272461	339178	135261	233156	269412
PC(36:2)	4.10237	785.593	1.06718e+06	18177822	1290094	628455	2.56972e+06	1.01498e+06	883951	1.54031e+06	372154	562855	356938	349359	519759	337017	478063	616317
PC(38:4)	4.07242	809.594	98657.5	2.95175e+06	210042	0	435251	135863	0	165205	820056	501952	774178	716279	988996	671449	945740	1.0237e+06
PE(P-36:4)	4.0675	723.519	424162	2.78278e+06	554331	217040	870366	444743	261779	416324	0	0	0	0	0	0	0	0
Phe-Gly	11.4867	222.1	0	0	0	0	0	0	0	0	122946	188182	151779	225184	157340	208488	134650	225304
Phenol sulfate	4.95406	173.999	619834	406005	713704	479400	567848	547394	417182	415613	260005	287510	255241	271353	290974	216997	228253	213193
Phenolsulfonphthalein	7.64015	354.056	4.87274e+06	3414711	2895627	2.06436e+06	6.47891e+06	3.84358e+06	2.33032e+06	2.06349e+06	19071744	27162092	25647462	20278062	22477692	22852100	22032426	19175158
Phenylacetaldehyde	8.66061	120.057	69807.7	50438.8	66290	90141.4	62352.9	107907	82231.8	61873.9	0	0	0	0	0	0	0	0
Phenylacetylglycine	7.67023	193.074	351542	246516	361843	367523	438467	407681	282117	318002	406408	520509	522414	415396	469140	393404	426188	528549
Phenylethyl alcohol	4.78092	122.073	127678	135063	101316	122449	108888	89120.9	123144	91126.4	6189.63	5869.69	4851.85	0	0	0	0	0
Phenylethylmalonamide	9.27435	206.106	0	0	0	0	0	0	0	0	144375	183747	191404	266866	191728	267850	158318	158771
Phosphocreatine	15.0804	211.036	4270750	4.33796e+06	4782475	3.94195e+06	5.40726e+06	5.1467e+06	4997655	4765823	0	0	0	0	0	0	0	0
Phosphodimethylethanolamine	14.2225	169.05	3403139	7945762	3.35733e+06	3019105	9785718	4.3985e+06	4.17849e+06	3.35376e+06	0	0	0	0	0	0	0	0
Phosphoenolpyruvate	17.2491	167.982	1.85277e+06	2.38236e+06	1.24607e+06	742769	1.49451e+06	1.01625e+06	1192841	737080	28751	29763.8	35983.9	35208	30829.8	27151.5	29998.5	34395.4
Phosphonoacetaldehyde	15.013	123.993	3.52254e+06	2.60711e+06	3.51551e+06	2.66656e+06	3.86178e+06	3119679	3.82805e+06	3.68002e+06	0	0	0	0	0	0	0	0
Phytuberin	4.12606	294.183	4.53387e+06	2.56235e+06	2219243	5514014	3640745	3409364	6.86518e+06	5131047	804448	892691	800776	952892	998854	781349	795896	865088
Picolinamide	14.2141	122.048	8738578	2.88411e+06	9643226	8224033	8799351	7700504	11372551	9187124	297330	180915	303611	345661	166434	235973	218454	286539
PIPES	14.1921	302.061	12106685	13434227	11531819	14005400	10837430	12832589	9562025	7.80118e+06	5127527	6.02006e+06	5.26993e+06	5007811	5976862	4.82103e+06	6.05475e+06	5.93164e+06
p-Phenolsulfonic acid	6.21046	173.999	103588	114491	193777	120169	84589.6	133817	108762	136562	45605	46566.2	46706.8	53357.1	49957.7	52711.7	54388.4	45870.7
Precocene 2	4.37057	220.11	385274	389640	323820	506794	386828	411470	370799	522803	74551.2	61254	90969.4	75323.5	52536.2	100135	65261.5	71303.3
Pro-Arg-His	26.2717	408.224	372726	410146	385721	331308	402985	320001	338604	260044	183858	183512	181106	197749	166045	193160	179063	201331
Proclavaminic acid	9.97009	202.095	330064	217433	478405	271799	368703	256352	295615	323722	0	0	0	0	0	0	0	0
Propanoyl phosphate	11.8674	154.003	124853	82139.9	111263	82837.6	146362	92504.6	146889	103281	0	0	0	0	0	0	0	0
Propyl cinnamate	4.26863	190.099	0	0	0	0	0	0	0	0	97045.6	113826	67960	79859.5	59671.8	68933.3	24516.3	124814
PS(34:1)	3.8343	761.52	421631	3853032	895834	509724	1191281	710585	292076	746572	0	0	0	0	0	0	0	0
PS(36:1)	3.80068	789.552	537154	3921897	1.32911e+06	547354	1497559	860924	326834	610418	0	0	0	0	0	0	0	0
PS(36:2)	3.82146	787.537	238098	2258878	583065	279319	769831	405778	172718	351650	0	0	0	0	0	0	0	0
PS(40:5)	3.82672	837.553	123169	1.48522e+06	281704	197124	434808	258023	84735.3	208116	0	0	0	0	0	0	0	0
Pseudouridine	11.9812	244.07	2372355	2.01318e+06	2.75153e+06	2.14776e+06	4.03276e+06	2.62338e+06	2.76088e+06	2761239	843205	894304	918279	844952	971120	955213	997905	984258
Pseudouridine 5'-phosphate	16.1954	324.036	86394.7	76929.5	145878	110976	163854	115651	171414	125806	0	0	0	0	0	0	0	0
Psicofuranin	9.64295	297.107	551297	402766	691741	400849	851072	530861	590176	499702	453611	551713	546657	472493	723754	459851	649130	660920
psicoselysine	16.7633	308.158	0	0	0	0	0	0	0	0	192633	272515	202709	227765	218511	256541	191750	237713
Pyridine-2,3-dicarboxylate	14.9847	167.022	3.16836e+06	2.28292e+06	3.59581e+06	3.26492e+06	4223510	2520839	3006028	3438458	244414	229467	305981	266235	309514	218292	251770	238513
Pyridoxal	8.20996	167.058	307360	141900	454334	452443	542287	418485	460887	530388	167444	125031	182937	153092	187349	181228	169668	149860
Pyridoxine	8.20714	169.074	11671429	6.565e+06	13066790	8.17874e+06	19854472	15080680	9772475	12419445	31911696	33613076	31165276	31240582	31054890	34290088	29804620	27276762
Pyrimidodiazepine	4.44226	221.091	0	0	0	42073.6	0	0	37468.7	0	148074	140771	242090	76363.2	143542	79977.8	51239.4	141727
Pyruvate	9.47169	88.0159	419194	296205	435262	307113	538895	350665	457847	336111	544845	661162	644580	566497	535961	611025	578903	578441
Retinyl ester	4.26695	302.225	184664	65791.2	0	183269	327846	200425	197763	104106	40027.5	34994.5	49994.4	28043.9	75396.5	64378.3	24395.4	0
Riboflavin	8.78835	376.138	742503	247308	817296	580019	1.07376e+06	924284	646272	566926	676573	1.09795e+06	754598	718971	1.00132e+06	691983	905555	864434
Riboflavin cyclic-4',5'-phosphate	11.9498	438.094	350266	185818	408845	308046	373029	310025	440510	305974	0	0	0	0	0	0	0	0
Ricinine	7.99472	164.059	43918.8	66675.3	0	41253.4	29653.6	62820.5	30896.5	35516.7	90768.2	148209	23625.2	111182	43374.8	121221	62635.3	57867.8
S-(2-Methylbutanoyl)-dihydrolipoamide	4.72138	291.132	1476474	1.08874e+06	1.33465e+06	1.15968e+06	1.28005e+06	1.49657e+06	1.21874e+06	1.5053e+06	0	0	0	0	0	0	0	0
S-(3-Methylbutanoyl)-dihydrolipoamide	5.15357	291.132	1036744	1.08098e+06	1.0342e+06	1072547	1.02503e+06	958694	952255	1.00049e+06	0	0	0	0	0	0	0	0
S-(3-oxo-3-carboxy-n-propyl)cysteine	13.7907	221.036	316303	158317	266866	106082	314388	308398	317266	154613	0	0	0	0	0	0	0	0
S-(Formylmethyl)glutathione	12.6578	349.094	3.29875e+06	666898	4.81528e+06	8194992	3112575	2.51908e+06	6299336	6706833	0	0	0	0	0	0	0	0
S-Adenosyl-4-methylthio-2-oxobutanoate	11.621	397.106	50888.1	53978.7	47712	29915.9	87192.9	88662.8	55872.5	41971.9	144283	173081	146734	144977	176568	167157	155803	168347
S-Adenosyl-L-methionine	16.3978	398.137	12983801	7.15914e+06	14283160	9046443	11945865	9581169	14591753	12437838	158922	108222	132394	134174	119276	146574	141803	115756
Ser-Ser	13.8435	192.075	164680	91499.8	206264	173808	191546	169470	214732	192328	0	0	0	0	0	0	0	0
Sinalbin	14.7241	424.037	2.51779e+06	1.38662e+06	2.73385e+06	1.87025e+06	2.47843e+06	2179412	2.86736e+06	2.29671e+06	0	0	0	0	0	0	0	0
Sinapyl alcohol	4.67246	210.089	625014	537253	485262	460333	412509	451006	552843	656648	0	0	0	0	0	0	32961.1	0
Slaframine	10.1941	240.147	1.52851e+06	894599	1.6259e+06	1256688	2.03676e+06	1255503	2.03934e+06	1.49616e+06	116830	87127.7	120667	122614	141550	109329	100996	114745
SM(d18:1/24:1(15Z))	4.22106	812.678	629031	5002945	1.15672e+06	370658	1.9173e+06	915657	535614	1.024e+06	294448	373384	268156	240727	404375	203052	303450	348209
SM(d32:1)	4.42252	674.536	739724	3430002	605323	891530	1.02228e+06	622288	1.3464e+06	2865401	52447.4	101626	65567.8	88217.6	143385	59950.2	134586	127195
SM(d34:1)	4.35568	702.567	4758357	25376256	3.99648e+06	4.00683e+06	6883127	4032970	6020384	15435402	963066	1.27938e+06	944628	877355	1.135e+06	939741	1067608	1.16121e+06
S-Methyl-5-thio-D-ribose 1-phosphate	12.6013	260.012	275331	244132	373852	327658	354998	299679	283607	259347	0	0	0	0	0	0	0	0
sn-glycero-3-Phospho-1-inositol	15.9792	334.067	7865128	5.05982e+06	7850742	6.85052e+06	7323043	5201807	6829198	5.82472e+06	49774.7	53553.2	76066.8	50911.4	66809.2	67948.2	63637.1	59200.6
sn-glycero-3-Phosphocholine	14.4883	257.103	1094761600	320361632	1203688960	968789056	1548460800	1054716672	1456496256	1396210560	10183572	11646077	10478946	10428300	11897658	10651429	11599505	10540361
sn-glycero-3-Phosphoethanolamine	15.6326	215.056	14492358	11903741	16644879	13358562	22089290	15006096	20015238	17166006	106159	92742.6	103527	103132	114309	115855	98599.8	94266.4
sn-Glycerol 3-phosphate	14.836	172.014	57225308	30340386	69322064	37500428	49502216	49049276	60301476	52167056	463550	550879	812643	451869	658293	583619	601709	577587
sodium dodecyl sulfate	3.82777	266.155	10693533	4.15258e+06	7703434	12645949	7.76939e+06	12087032	16030345	14438007	3.65104e+06	27177084	3.18152e+06	2.56174e+06	5.89884e+06	2.35238e+06	1.65558e+06	3.35739e+06
SP (4:0)	4.39332	277.24	93960.1	132260	74381.2	307333	126755	214313	295815	270984	228751	190253	319052	356068	259705	347842	246016	189287
Sphinganine(d17:0)	4.6536	287.282	749865	582006	827338	598486	623532	570474	566218	843786	140363	147939	127164	120981	148589	120151	106586	145071
S-Sulfo-L-cysteine	16.4215	200.977	0	0	0	0	0	0	0	0	1.62036e+06	1.77132e+06	1.70018e+06	1706104	1.67062e+06	1.71325e+06	1.65532e+06	1.48975e+06
Stealthin C	14.3799	307.084	214769920	230589392	276160832	233381424	304155936	194969856	250036672	227499760	284103	114707	246160	291223	146046	179550	147992	172501
Suberic acid	12.5027	174.089	334817	204356	344518	294526	334030	327517	346936	343796	38206.9	40682.2	51498.3	30308.5	41653.1	34822.3	26401.7	29540.3
Succinate	14.9443	118.027	4.52941e+06	3.74353e+06	4561313	2.91098e+06	7640224	5604197	5078489	5.07672e+06	1.75897e+06	1.77392e+06	1.89618e+06	1.62086e+06	1.79233e+06	1.92969e+06	1.60865e+06	1.67691e+06
Sucrose	15.1899	342.117	415703	93131.9	85236.5	60056.6	130543	173195	160433	101274	175488	95033.1	124874	63518.9	53621.1	50555.1	43229	84984.7
Sulfoacetate	17.4938	139.978	194474	222423	153764	155458	244257	192069	136925	158746	93191	104785	88596.1	79110.2	119811	83058.2	93253.3	95473.1
Taurine	14.8704	125.015	36268828	25749046	39236740	35271028	45607608	36317488	45740900	40698572	1.40287e+06	1.63437e+06	1.33801e+06	1.35097e+06	1648383	1.62864e+06	1.2235e+06	1468274
Tentoxin	4.17342	414.226	507682	638608	488188	473411	591374	530167	544618	612276	0	0	0	0	0	0	0	0
Tetracosanoic acid	3.85488	368.366	347364	529687	144811	214036	233581	357862	236917	402398	141477	311706	235243	315284	273176	92254.2	172280	205127
Tetradecanoic acid	28.586	228.209	31290664	33399710	31331586	31175436	33868180	31828018	32415396	32127802	35384308	31685778	32090066	31579286	32589338	31198236	35593836	32346312
Tetraethylammonium	7.71834	129.152	619710	417201	411707	462387	472328	437133	414398	425213	696765	347108	554928	517859	347343	380000	442896	591988
Tetranor-PGE1	4.37956	298.178	354064	362956	261765	329708	343584	324644	385649	438310	15036.2	0	16876.6	0	14822	11143.8	0	0
Tetranor-PGF1alpha	4.45827	300.194	346452	334545	314791	323740	385487	347202	304898	397571	0	20334.7	13704.4	14855.1	0	0	8240.34	14704.3
Thiamin	19.681	264.104	238264	136685	201078	134128	252853	205540	150131	215931	2802218	3105705	2750505	2.76138e+06	2.88548e+06	3.0628e+06	2753045	2481214
trans,trans-hepta-2,4,6-trienoic acid	4.47853	124.052	578126	649252	523574	530032	733001	537465	551452	615368	0	0	0	0	0	0	0	0
trans-3-Octenedioic acid	12.0012	172.074	230953	188479	290089	238064	314772	211147	228764	253234	88694.7	63434	75515	67929.5	87927.8	72554.9	75458.8	70423.6
Traumatic acid	4.93274	228.136	245373	253038	241130	290006	292700	269390	245904	326472	55378.5	63884.4	50971.5	38182.2	69238.5	59944.8	51005	53614.6
Tributyl phosphate	4.17038	266.165	296854	398401	423739	910967	416100	1.80701e+06	387367	1.84104e+06	1.06004e+06	757950	698068	654344	1291169	836797	762411	250944
Tributyrin	4.91309	302.173	264194	282160	324846	343828	459559	372401	422012	339342	22663.8	22494.3	17721.8	11865.2	29854.2	17101.1	17714.3	18866.5
triethyl phosphate	4.47041	182.071	274005	327596	309057	296114	290192	437052	191067	351316	156110	48448.5	112004	72311	176388	104709	145530	54185.6
Trimethylaminoacetone	28.2871	115.1	282440	527328	786305	403318	356147	346787	458111	421829	408825	334790	410956	396537	383376	296011	311658	317225
Tris(butoxyethyl)phosphate	4.01861	398.244	2.08658e+06	2.40243e+06	442984	59921.3	2425344	62631.5	503511	48463.7	49942.3	316279	103914	72132	125154	71156.8	306314	120077
ubiquinol-1	4.41758	252.136	718376	711002	519712	576084	725515	569235	666999	781693	44757.3	62562.7	69898.3	53977.4	27722	70897.7	46102.3	53188.1
UDP	16.2606	404.003	5749205	4797171	6773091	6.52811e+06	7.60134e+06	6.59029e+06	9326338	7366389	0	0	0	0	0	0	0	0
UDP-D-galactose	16.1372	566.056	38767060	23112676	42059480	27409358	42616532	32595220	43776232	37634792	0	0	0	0	0	0	0	0
UDP-D-xylose	16.0165	536.045	711143	507453	925012	611252	975215	632786	889565	834427	0	0	0	0	0	0	0	0
UDP-N-acetyl-2-amino-2-deoxy-D-glucuronate	17.2634	621.062	2.74177e+06	1.41901e+06	2.22304e+06	1.97859e+06	2.92563e+06	2.01675e+06	3.04846e+06	2.49586e+06	0	0	20858	0	0	0	0	0
UDP-N-acetyl-D-galactosamine	14.8627	607.082	32525608	18245558	37582088	29758648	41191152	30664094	40614144	36987840	0	0	0	0	0	0	0	0
Umbelliferone	5.16699	162.032	1.00723e+06	546084	796820	914904	784377	736750	1.01271e+06	1.33252e+06	0	0	7626.79	16367.9	15257	0	0	0
UMP	15.1864	324.036	222144	162691	308104	216498	260055	233586	291413	233758	75547.1	91872	76196.6	85553.1	95463.7	76213.4	109025	84402.8
Uracil	8.48957	112.027	46743	76335.4	78765.2	80065.4	133540	87222.6	86953.5	88453.5	45772.9	47182.5	43828	47662	52577.3	38569.2	39190.5	44926.6
Uracil 5-carboxylate	12.8309	156.017	274451	182560	230420	235568	245755	190818	241349	229138	0	0	0	0	0	0	0	0
Urethane	8.90107	89.0477	1.0961e+06	672811	922880	762707	915448	818089	1.12629e+06	934286	107704	86570.9	95469.4	81987.6	120217	64165.1	99379.2	70550.9
Urocanate	10.7876	138.043	261299	260218	248918	257319	282540	335237	251013	248729	251953	314488	383391	227160	601276	342703	237728	232984
Ursodiol	7.66029	392.293	973230	2.06817e+06	952302	1.04793e+06	969203	1.04012e+06	975821	991195	1.23769e+06	883138	994646	844581	996616	892777	886700	856942
UTP	17.3738	483.969	16291703	17945354	21285616	17183372	24045016	18124166	19857230	19580136	20492	0	18472	20400	0	20004.1	6671.1	12489.2
Val-Val	13.5298	216.147	326880	139953	324368	186895	327640	180422	317486	306392	0	0	0	0	0	0	0	0
Vanilpyruvicacid	5.0972	210.053	929596	1.52702e+06	874755	1.04767e+06	1182167	1.12218e+06	952237	848512	24491.1	27295.9	19728.8	51967.8	20131.1	47938.5	22361.8	14284.5
Xanthine	11.2973	152.033	1.66441e+06	1.88807e+06	2.02372e+06	1.15787e+06	2.84548e+06	2.18839e+06	1.67833e+06	1.4882e+06	3.29945e+06	3.70588e+06	3.42158e+06	3.36213e+06	3725776	3648387	3334643	3.28534e+06
Xanthosine	12.7997	284.076	85691.2	35739.5	151296	112471	114297	82041.3	87479.5	87142.9	0	0	0	0	0	0	0	0
Xanthosine 5'-phosphate	17.6812	364.042	359053	205919	512523	196093	206102	163697	227482	107074	0	0	0	0	0	0	0	0
XDP	17.3698	444.008	168682	183916	172244	162758	354341	207944	145628	117327	0	0	0	0	0	0	0	0
Xylitol	12.973	152.068	509594	300166	497507	248412	549836	343614	368957	354799	932001	860899	956049	931090	901489	908850	860532	992517
ZAPA	13.893	146.015	141811	86815	109426	0	179533	125753	87595.8	52999.1	252976	392566	302850	438995	283942	456772	308415	413108
Zinnimidine	7.63197	261.137	88972.4	91405.5	75336.3	80840.8	94337.1	76143.8	39143.5	76652.7	105539	217609	190877	65601	97087.4	74255.8	101730	107133
α-(2,6-anhydro-3-deoxy-D-arabino-heptulopyranosid)onate 7-phosphate	16.198	272.03	2.49137e+06	2.03835e+06	2.37512e+06	2.21561e+06	3040302	2282283	3.09321e+06	2.54335e+06	0	0	0	0	0	0	0	0
γ-glutamyl-L-alaninol	12.0634	204.111	329677	227945	439190	280010	418513	271725	401937	374844	0	0	0	0	0	0	0	0
γ-glutamyl-S-t-propenylcysteine	11.4686	290.094	540464	418505	249751	89247.1	387990	366168	179171	105995	0	0	0	0	0	0	0	0
gamma-L-Glutamyl-D-alanine	14.8981	218.09	433776	390592	438442	423268	640491	546584	542154	520054	561826	723576	496923	642886	563628	619935	498965	505289

## Sheet: EXP1_Target
Metabolite	CP_Control1	CP_Control2	CP_Control3	CP_Control4	CP_Isoprenaline1	CP_Isoprenaline2	CP_Isoprenaline3	CP_Isoprenaline4
(S)-Lactate	4645365009	3739486927	5573148243	3529944885	6154758775	4606972371	4924311155	4319339377
(S)-Malate	504336300	400151960	522548095	360784022	667288141	484369288	533540736	501845012
3',5'-cyclic AMP	1794505	1461348	3588220	2300343	5439521	3336780	4487017	2910001
3-Phospho-D-glycerate	944759	1520205	824839	764829	755345	419453	235183	381289
6-Phospho-D-gluconate	18568064	14545639	24519364	37433276	34094619	32863465	22969942	24555622
Acetyl-CoA	40924988	27344707	43756204	28980995	38237162	27344916	41109273	35673409
Adenosine	588278816	23760388	914839908	394419049	1076862052	700706197	921067492	869518011
ADP	102709934	69412365	136698857	89257495	151762934	117773225	192357137	134397582
AMP	26763489	13061575	27080455	14530196	27261765	19562168	44206124	29340618
ATP	767513342	686245022	1046828951	731797296	1011097034	794893584	967773428	935525568
cis-Aconitate	35695568	54654631	40721622	26849226	70073404	57559678	43844392	20428650
Citrate	926229665	928694838	1220487800	937099827	1544905663	1424036080	1013923700	1214535585
dATP	20184227	16369142	26430367	14813822	31073157	24154080	31055047	23633011
D-Fructose 1,6-bisphosphate	28959570	21452753	172885937	45748344	68962045	40469975	23324574	22081714
D-Glyceraldehyde 3-phosphate	128276929	89581689	146748558	76405633	137725631	95638146	141386884	107714969
D-Ribose 1,5-bisphosphate	2865354	3558083	3790875	1120684	3380644	1693860	1148251	1152233
D-Ribose 5-phosphate	37547657	72345391	50555640	33652163	50445572	32881013	44556526	31895805
D-Sedoheptulose 7-phosphate	36609104	36003253	50780955	28278676	71205886	44680407	78663776	49244575
GDP	7058171	11222473	13867382	6876026	18874275	12738648	13104820	3157030
Glycerone phosphate	128276929	89581689	146748558	76405633	137725631	95638146	141386884	107714969
GTP	42645883	62185010	43550345	40881595	44415100	52871169	38725565	40424920
Guanosine	3279934	1961083	4637044	1713200	7558605	3149284	4812066	6094282
Hypoxanthine	740829	110390	N/F	33200	35723	19638	25938	N/F
Inosine	74030953	30847038	21310301	4454181	21095560	7778543	14801235	10262283
NADP+	59761377	139193842	59440670	67024481	63012368	62164057	64767889	57432795
NADPH	123202836	3659932	146197608	135778571	175386272	118615711	141775956	148681869
Urate	28201	N/F	16018	N/F	194306	101349	172877	96709
Xanthosine 5'-phosphate	1814890	1271010	3395357	1042055	1304750	709326	1201093	615961
Glucose	15452714	10506715	13823267	7240062	32120605	31006376	12655973	14063598
Glucose 6-phosphate	114457823	107595871	117149883	157443359	231902522	225830319	221435801	194152070
Fructose 6-phosphate	77917246	68234364	78590202	78220568	142779701	117628567	153710821	117483512
2-oxoglutarate	30175953	59847335	127418035	431836	138645483	49864079	19476393	901739
Succinate	53545314	39380251	54952756	33787065	81681110	64283775	59680014	62396501
Xanthine	16290	150828	46688	210081	70216	169193	89237	108798
IMP	584927	1781236	2346818	369570	1172118	606932	972466	370701
GMP	1019301	392686	918810	474403	1502139	872432	552255	906597
Glutamine	2186502056	2993734253	2664135371	2375806520	3076230499	3086237779	2168329773	2705209293
Compound	M_control_1	M_control_2	M_control_3	M_control_4	M_isoprenaline_1	M_isoprenaline_2	M_isoprenaline_3	M_isoprenaline_4
(S)-Lactate-0C	6170453515	6088446926	6700203459	6397728564	6047395791	6170195032	6437492692	6123725950
Urate	17161354	16965901	17352362			22221027	19869533	20029941

## Sheet: EXP2_Untargeted
Putative metabolite	retention time	Mass	CP_control_1	CP_control_2	CP_control_3	CP_control_4	CP_isoprenaline_1	CP_isoprenaline_2	CP_isoprenaline_3	CP_isoprenaline_4
(-)-12-hydroxy-9,10-dihydrojasmonic acid	7.39911	228.136	166929	219076	232700	103180	117990	129277	200099	116558
(-)-erythro-(2R,3R)-dihydroxybutylamide	7.47105	119.058	1.41056e+06	1.88823e+06	2111863	1.51513e+06	1.5665e+06	1.17349e+06	1421767	1.46402e+06
(-)-Jasmonic acid	4.17148	210.126	613562	816483	521865	523416	517900	597669	511879	454765
(+/-)-5-[(tert-Butylamino)-2'-hydroxypropoxy]-1,2,3,4-tetrahydro-1- naphthol	3.85311	293.199	87160704	88031736	85613288	82752792	71223536	39328436	55449956	41214272
(1-Ribosylimidazole)-4-acetate	17.4779	258.085	85042.6	103410	133013	131582	176712	105581	181630	124220
(1S,3R,4S)-3,4-Dihydroxycyclohexane-1-carboxylate	7.43946	160.074	2.86567e+06	3.32574e+06	2.87288e+06	2.33721e+06	3355788	2.32775e+06	2597103	3250386
(1S,4S)-4-Hydroxy-3-oxocyclohexane-1-carboxylate	10.7857	158.058	117327	132518	128630	118534	193967	130005	88535.9	105719
(2E)-2-butylidene-4-hydroxy-5-methyl-3(2H)-furanone	4.1696	168.079	707631	728416	692301	817103	712356	755521	800815	788634
(2S)-2-Isopropyl-3-oxosuccinate	7.46953	174.053	597805	638027	465504	624367	471638	504164	317951	391591
(3S,5S)-carbapenam	9.0786	155.058	334121	311774	562342	586515	467780	327183	548019	480586
(6R)-6-(L-Erythro-1,2-Dihydroxypropyl)-5,6,7,8-tetrahydro-4a-hydroxypterin	11.4144	226.107	129103	95383.3	197514	143791	156801	153945	134480	196849
(6S)-6-beta-Hydroxy-1,4,5,6-tetrahydronicotinamide-adenine dinucleotide 2'-phosphate	17.6371	763.101	69374.7	0	0	71255.7	88886.1	68100.4	82740.2	100041
(R)-2,3-Dihydroxy-3-methylbutanoate	8.75446	134.058	107572	126971	163464	132087	145096	136593	130760	111841
(R)-3-((R)-3-Hydroxybutanoyloxy)butanoate	13.0667	190.084	73061.8	88599.5	59965.6	67313.8	85332.5	66965.5	44466.2	48939.3
(R)-3-Hydroxybutanoate	8.03243	104.047	275001	249927	274602	236745	223425	286667	224646	202252
(R)-Lactate	14.9875	90.0317	2976597	2188465	3.63493e+06	2.6442e+06	2.34322e+06	3214214	1.9901e+06	2.12955e+06
(R)-S-Lactoylglutathione	12.5275	379.105	802820	957603	2.16606e+06	1.09941e+06	1161954	1165897	906172	1.19858e+06
(S)(+)-Allantoin	14.1433	158.044	353122	296806	390654	402585	281032	335665	237362	245027
(S)-1-Pyrroline-5-carboxylate	15.4734	113.048	5.20139e+06	6.0358e+06	11229091	6.09318e+06	8551713	7.53243e+06	3.68396e+06	5164223
(S)-2-Aceto-2-hydroxybutanoate	7.47102	146.058	317101	266047	337187	294484	280036	248984	217582	264988
(S)-2-Acetolactate	7.46541	132.042	1.97837e+06	1.87151e+06	2.24323e+06	1.9437e+06	1.5811e+06	1.91725e+06	1.89871e+06	2.05615e+06
(S)-2-O-Sulfolactate	17.9962	169.989	3.23457e+06	3565026	5.29529e+06	4493499	3.56655e+06	3.53937e+06	3.28379e+06	3.75131e+06
(S)-3-Methyl-2-oxopentanoic acid	7.46541	130.063	1.64906e+06	1.82925e+06	1.75705e+06	1.50247e+06	1.21473e+06	1717307	1.40028e+06	1.47426e+06
(S)-ACPA	15.0357	214.059	782260	646710	688767	669120	957901	764360	340536	401503
(S)-AMPA	9.74313	186.064	323389	321929	253717	300037	248799	240085	170795	214013
(S)-Lactate	9.80364	90.0317	113181352	89905456	124863608	100149688	101922552	120965464	84798560	74817992
(S)-Malate	16.3005	134.022	37277400	52116620	75399336	72993344	76528888	61451540	77603040	74018560
(S,S)-Tartaric acid	17.6666	150.016	352203	355377	389734	313140	397330	323387	316724	308693
[6]-Paradol	3.71073	278.188	156593088	158792944	151037248	153470144	145305504	144171232	134512128	145259872
[FA (10:0/2:0)] Decanedioic acid	4.3758	202.12	452677	418625	427851	402306	356369	370342	389725	384608
[FA (11:0)] undecanoic acid	3.83254	186.162	1020279	1.15082e+06	882412	814690	797365	1.0508e+06	828360	652457
[FA (11:0/2:0)] Undecanedioic acid	8.57794	216.136	122152	101593	131254	96467.7	149609	269871	35578.6	94374
[FA (13:0/2:0)] Tridecanedioic acid	4.57439	244.167	417859	348202	357565	344767	652278	314193	291309	264092
[FA (18:1)] 9Z-octadecenamide	3.91657	281.272	1.28823e+06	1.26694e+06	877897	2.00799e+06	1.2701e+06	1.59892e+06	1452973	1.95709e+06
[FA (18:1)] 9Z-octadecenoic acid	3.61109	282.256	28396350	19224558	15897357	21659562	16950786	16892538	16499021	14872485
[FA (18:2)] octadecadienoic acid	3.70968	312.23	984177	983591	1.3151e+06	1.20158e+06	839856	971190	869989	400296
[FA (8:0)] octanoic acid	7.34636	144.115	436690	437523	421490	557618	501909	487350	481886	468129
[FA (8:1/5:2/7:0)] 5-hydroperoxy-7-[3,5-epidioxy-2-(2-octenyl)-cyclopentyl]-6-heptenoic acid	4.05746	354.205	3.34032e+06	826728	754675	1265429	1.17626e+06	1.13028e+06	1.13228e+06	1.08391e+06
[FA dioxo(8:0)] 4,7-dioxo-octanoic acid	4.5512	172.074	535368	626629	679817	764196	582070	544461	570414	667468
[FA hydroxy(11:1)] undecenoic acid	4.0412	200.141	577151	514685	490985	504857	536112	428366	457211	412068
[FA hydroxy(11:2/11:2)] 2R,9R-dihydroxy-3S,4S,7S,8S-diepoxy-5E,10-undecadien-1-ol	8.89239	228.1	737256	747882	820979	787034	770779	617568	565788	746554
[FA hydroxy(18:2)] 13S-hydroxy-9Z,11E-octadecadienoic acid	3.71726	296.235	1.17273e+06	1.26312e+06	903520	1200715	987971	838003	878554	881464
[FA hydroxy(9:0)] 2-hydroxy-nonanoic acid	4.52698	174.126	597191	584002	493836	522574	437166	414438	314778	664501
[FA hydroxy(9:0)] 3-hydroxy-nonanoic acid	7.39835	174.125	277979	373962	381304	327858	281725	328972	243023	378189
[FA methoxy,hydroxy(18:2)] octadecadienoic acid	3.80583	326.246	748707	726497	533917	917394	853250	1.00068e+06	1.01595e+06	1024809
[FA methyl(11:0)] 10-methyl-undecanoic acid	7.34535	200.178	463389	317499	319931	322959	378019	341678	269720	306055
[FA methyl,hydroxy,oxo(5:2/4:0)] methyl 4-[2-(2-formyl-vinyl)-3-hydroxy-5-oxo-cyclopentyl]-butanoate	3.80888	254.115	896109	803928	936512	992202	1.00569e+06	1.01193e+06	819661	995979
[FA oxo(8:1)] 5-oxo-7-octenoic acid	4.43377	156.079	1.05556e+06	1180202	1.16564e+06	1.08986e+06	961177	950136	1.13329e+06	1.04834e+06
[FA oxo,amino(6:0)] 3-oxo-5S-amino-hexanoic acid	12.6857	145.074	360540	337696	427168	316765	311115	468127	310179	272378
[FA trihydroxy(2:0)] 9S,11R,15S-trihydroxy-2,3-dinor-5Z,13E-prostadienoic acid-cyclo[8S,12R]	3.72584	326.209	5.91053e+06	6.42774e+06	7210962	7621037	4.82314e+06	3422965	4.59218e+06	2.72445e+06
[FA trihydroxy(20:4)] 5S,12R,20-trihydroxy-6Z,8E,10E,14Z-eicosatetraenoic acid	3.8607	352.224	1.65422e+06	1.71388e+06	2256037	916061	1.7643e+06	775319	872237	887539
[FA trihydroxy(4:0)] 2,3,4-trihydroxy-butanoic acid	13.0952	136.037	30203036	30711910	40517152	33492970	36651136	32849730	34516076	32426682
[FA] Methyl jasmonate	3.92623	224.141	3.08502e+06	3496947	3.46513e+06	2.93815e+06	2.97176e+06	2.19227e+06	2.65752e+06	2.16973e+06
[Fv] Calomelanol D-1	8.55476	388.13	205962	324048	330056	232111	259215	114440	75391.2	107151
[LysoPC(14:0)] 1-tetradecanoyl-sn-glycero-3-phosphocholine	4.39099	467.301	783950	578383	817918	965574	857930	784792	828410	862333
[LysoPC(16:2)] 1-hexadecyl-sn-glycero-3-phosphocholine	4.30123	481.353	2.14386e+06	1.61978e+06	1.60442e+06	3.49412e+06	2.04789e+06	3.37062e+06	2.74798e+06	3.55043e+06
[PC acety] 1-acetyl-sn-glycero-3-phosphocholine	10.2459	299.113	2.05421e+06	4.77003e+06	8647155	784209	3.32236e+06	460621	328037	723988
[PC methyl(15:2)] 1-pentadecyl-2-methyl-sn-glycero-3-phosphocholine	7.39911	481.353	391608	270180	527659	619888	425362	564852	590956	522235
[PC(12:4)] 1-hexyl-2-hexyl-sn-glycero-3-phosphocholine	4.55496	425.291	460117	390234	618237	748876	729340	720410	561693	843253
[PC(16:0)] 1-hexadecanoyl-sn-glycero-3-phosphocholine	7.30335	495.332	708655	410156	521421	1048893	548170	700743	596717	611373
[PC(16:1)] 1-(1Z-hexadecenyl)-sn-glycero-3-phosphocholine	4.23045	479.338	1.50722e+06	1264072	1.35712e+06	2.28302e+06	1925734	2.0272e+06	2.30409e+06	2.37615e+06
[PE(16:1)] 1-(1Z-hexadecenyl)-sn-glycero-3-phosphoethanolamine	4.23419	437.29	1.24536e+06	830769	938448	2.35995e+06	1207599	1.7633e+06	1.97092e+06	1.70512e+06
[PI(18:1)] 1-(9Z-octadecenoyl)-sn-glycero-3-phospho-(1'-myo-inositol)	3.9061	598.311	666624	629292	604580	1.26959e+06	905904	1.34078e+06	1.178e+06	1.37351e+06
[PR trihydroxy(2:0)] (-)-8alpha,15-diacetoxy-4beta,9alpha,14beta-trihydroxy-3(16)-fusicoccene	3.79228	438.262	12640612	12765913	11493320	11329904	11147169	4140405	8400223	5.71509e+06
[PR] Iridotrial	4.47772	182.094	1.13819e+06	1.58384e+06	700951	979001	924292	1.14257e+06	882973	823411
[PR] Tretinoin/All-Trans Retinoic Acid	3.77412	300.209	3.76111e+06	2.16335e+06	1516304	1.66883e+06	3.11509e+06	1.29089e+06	1.26578e+06	1226785
[SP (14:0)] 1-deoxy-tetradecasphinganine	4.39207	229.24	499382	576686	529605	326096	358158	416092	368576	275355
[SP (3:0)] sphinga-4E,8E,10E-trienine	3.94682	295.251	729714	706703	751616	845971	640612	461872	621761	594148
[SP amino(18:0/2:0)] 2S-aminooctadecane-1,3R-diol	7.51312	301.298	297101	370994	481248	435979	361956	238111	333366	215210
[SP hydrox] 4-hydroxysphinganine	7.55237	317.293	243559	230067	292099	290338	249198	205758	197287	169400
[SP hydroxy,hydroxy,methyl(10:2/2:0)] 6R-(8-hydroxydecyl)-2R-(hydroxymethyl)-piperidin-3R-ol	3.8863	287.246	924887	671475	769631	902489	682132	458564	603406	592396
[SP] Pramanicin	3.84208	369.215	2.51862e+06	2685255	2.49145e+06	2216528	2387732	1.29117e+06	1.89415e+06	1.56678e+06
[SP] Sphing-4-enine	4.57939	299.282	6.9262e+06	320926	436568	279545	196329	163764	243724	179485
[SP] Sphing-4-enine-1-phosphate	7.45693	379.249	2.69186e+06	2.39588e+06	3.46061e+06	5052097	3.66813e+06	4.49198e+06	4.68524e+06	5566112
[ST (2:0)] 5alpha-androstane-3,17-dione	4.02557	288.209	768545	614845	542646	845931	538993	323402	491400	419912
[ST hydrox] 3alpha,7alpha-Dihydroxy-5beta-cholan-24-oic Acid	4.27223	392.292	1.35084e+06	605716	767478	744410	915117	2.13384e+06	396186	952608
[ST hydrox] 3alpha-hydroxy-5alpha-androstan-17-one	3.86928	290.225	1.08474e+06	907721	992762	875527	927104	444198	527289	492624
[ST] (5Z,7E)-9,10-seco-5,7,10(19)-cholestatriene	4.74646	368.345	181682	269029	317140	151170	96496.8	0	39235.4	0
1-(3,4-dimethoxylphenyl)ethane-1,2-diol	4.2848	198.089	349562	267746	316723	254261	255357	223242	226954	248290
1-(beta-D-Ribofuranosyl)-1,4-dihydronicotinamide	8.64489	256.106	2.09923e+06	2.0694e+06	2603655	2.30536e+06	2.69417e+06	2.78254e+06	2.28821e+06	2.44241e+06
1,3,5-trimethoxybenzene	4.57995	168.079	4354512	4533933	4.39346e+06	5.19398e+06	5.21142e+06	4.67381e+06	4.68974e+06	5.22034e+06
1,9S,11R,15S-tetrahydroxy-13E-prostaene	3.55445	342.276	662032	830872	831127	926504	831721	690077	634379	540464
10-hydroxygeraniol	4.00796	170.131	210590	304945	323461	299129	329137	455293	397673	200266
10-oxogeranial	4.07265	166.099	474061	497877	444702	588269	519071	392888	513558	406650
13,14-Dihydro-15-oxo-lipoxin A4	7.46334	351.217	192004	243874	343385	350292	383143	264749	458220	426224
1-4-beta-D-Glucan	3.56117	536.159	2811062	2772668	3.66545e+06	3.18367e+06	2.7299e+06	3.42293e+06	2.7926e+06	3.61697e+06
14-Dihydroxycornestin	3.8088	308.126	1.35662e+06	1.24515e+06	1.29114e+06	1.36838e+06	1.1322e+06	641888	866099	758801
15-Keto-prostaglandinE2	3.9267	350.209	896012	1.22087e+06	510466	1.16475e+06	1.05076e+06	661675	794822	658894
1-Caffeoyl-4-deoxyquinic acid	14.6502	338.101	6.06598e+06	6772309	8817572	7758293	8.14001e+06	9488984	7802048	8412137
1-methylguanosine	9.51919	297.107	511401	483671	644669	516946	654666	698802	561983	534088
1-Methylhypoxanthine	8.19394	150.054	914869	991245	1.28952e+06	964173	1.36249e+06	1.3205e+06	1.25193e+06	1.40716e+06
1-O-(4-hydroxy-2-methylene-butanoyl)-beta-D-glucopyranose	4.58784	278.1	280000	292381	311033	309352	311234	300815	282844	349976
1-O-Methyl-myo-inositol	13.3302	194.079	198358	773129	216679	184399	183508	157012	153694	79533.7
1-Pyrroline-2-carboxylate	14.0665	113.048	724341	464176	656787	621522	553783	652662	567866	615195
1-thio-β-D-glucose	18.6263	196.04	3.70309e+06	5306047	6106832	5031852	7.3367e+06	6.49237e+06	7088731	7419935
2 -(Butylamido)-4-hydroxybutanoic acid	7.46182	189.1	667296	546771	543169	553717	642990	672990	413430	695418
2(alpha-D-Mannosyl)-D-glycerate	14.9689	268.079	691927	802189	1.17414e+06	1.26562e+06	1.25809e+06	1.13205e+06	1.50633e+06	1.2736e+06
2-(Hydroxymethyl)-3-(acetamidomethylene)succinate	20.3332	217.059	145236	150630	227909	170483	181703	162322	176482	187654
2-(sulfomethyl)thiazolidine-4-carboxylate	15.5474	226.992	463228	237356	399899	427830	536108	525031	464373	640759
2,3,4,5-Tetrahydropyridine-2-carboxylate	12.7788	127.063	373695	414541	580890	454373	497373	469476	405590	417777
2',3'-Cyclic CMP	12.6546	305.041	194219	424749	533335	168029	246535	198991	213651	202006
2',3'-Cyclic UMP	10.688	306.025	107827	172886	172275	86153.8	155067	121994	94654.1	115593
2,3-Dimethylmaleate	13.4756	144.042	1469997	1.21464e+06	1.61139e+06	1.68471e+06	1.5999e+06	1.97216e+06	1.78194e+06	1.30896e+06
2,5-Dioxopentanoate	12.0158	130.027	266485	335625	273110	246638	266440	291683	172637	205110
2,7-Anhydro-alpha-N-acetylneuraminic acid	13.4794	291.095	827344	871015	1.12017e+06	912964	1.03758e+06	1.01722e+06	937721	1.01782e+06
2-6-10-Trimethylundecanoicacid	7.34529	228.209	439672	309068	255107	217205	328058	264106	306480	256189
2-acetamidoglucal	12.5794	203.079	414266	513186	670375	592232	677908	658992	797777	773332
2-amino-3,7-dideoxy-D-threo-hept-6-ulosonate	13.1167	191.079	266082	225661	289243	226900	372598	376840	355316	362827
2-amino-4-oxo-4-α-hydroxy-6-(erythro-1',2',3'-trihydroxypropyl)-5,6, 7,8-tetrahydroxypterin	14.9507	321.092	198766	161435	173084	282710	181567	429889	318045	156242
2-Amino-4-oxo-6-(1',2',3'-trihydroxypropyl)-diquinoid-7,8- dihydroxypterin	11.3217	289.102	101491	93315.7	173218	112599	130518	176540	111418	130713
2-amino-6-hydroxymethyl-7,7-dimethyl-7,8-dihydropteridin-4-one	10.1109	223.107	428192	413487	616794	503884	568026	661431	425762	492113
2-C-Methyl-D-erythritol 4-phosphate	14.3139	216.04	210161760	186142688	195966992	174944720	185734720	201449872	165108544	148587600
2-Deoxy-2,3-dehydro-N-acetylneuraminic acid	12.8406	291.095	481500	484491	778191	519087	733662	727271	418515	518189
2-Ethylhexyl phthalate	3.76458	278.152	5.05094e+06	5.40818e+06	6494356	5295483	6.63428e+06	7.22997e+06	6.33915e+06	6841914
2-Hexenoylcarnitine	4.08719	257.162	747060	939220	971665	836220	903176	891724	602576	844359
2-Hydroxy-1,3-dimethoxy-8,9-methylenedioxycoumestan	7.43148	356.053	2.57405e+06	1974183	2.97366e+06	1820666	2.3171e+06	3.49538e+06	1.96013e+06	1.06499e+06
2-Hydroxy-2,4-pentadienoate	13.4354	114.032	210696	155409	222377	203095	191522	234328	171750	148716
2-Hydroxyethanesulfonate	7.47261	125.999	5952949	2.21363e+06	2.49254e+06	2.01567e+06	3.51882e+06	2.27431e+06	1.60174e+06	6.10133e+06
2-Hydroxymalonate	17.5665	120.006	92539.9	107327	87893.2	66052.7	94804.2	66014.2	49336.8	66424.9
2-hydroxypurine	7.8805	136.039	1.12091e+06	967511	1.31823e+06	952788	1.21181e+06	1.51549e+06	886745	1004290
2-Isopropylmaleate	7.45622	158.058	393024	539858	545480	376435	352559	436960	335382	274899
2-Methylbutyroylcarnitine	7.47453	245.163	650222	540293	758312	735255	978438	743838	669834	878936
2-Methylcitrate	17.7873	206.043	223794	259737	375988	311044	401664	422731	377550	357136
2-nitro-1-propanol	10.8607	105.043	1.35431e+06	1.61137e+06	2.04094e+06	2.03835e+06	1.78016e+06	1.77183e+06	2166287	2.23014e+06
2-Octenedioicacid	10.9197	172.074	971351	870251	1.16512e+06	904783	920550	914905	682729	825031
2'-O-Methyladenosine	14.5832	281.112	1.3694e+06	1.23959e+06	1.19614e+06	881027	875704	1.16285e+06	1.25252e+06	703677
2-O-Methylcytosine	7.61306	125.059	161153	139297	173399	124130	120938	189086	111925	143962
2-Oxo-4-hydroxy-5-aminovalerate	9.75015	147.053	876999	906532	1.45129e+06	1.19545e+06	1411499	1.12293e+06	1.14557e+06	1.24166e+06
2-oxobut-3-enanoate	7.46541	100.016	2.99041e+06	3.25909e+06	3414279	2.87418e+06	2.71617e+06	2.9621e+06	3.17819e+06	3.28054e+06
2-Oxobutanoate	14.3546	102.032	482223	415319	771207	440364	484801	601914	425728	389160
2-Oxoglutaramate	8.69169	145.037	213131	163366	225581	399634	352058	315046	361665	344776
2-Oxoglutarate	15.9268	146.022	1.51332e+06	1.42409e+06	3446294	4.80188e+06	5055945	3.70813e+06	9313877	6.06376e+06
2-Oxopentanoic acid	4.69727	116.047	4.70371e+06	4.16066e+06	4596645	4342066	2.83569e+06	4209782	3.3029e+06	3412287
2-oxosuberate	7.46347	188.069	296016	452611	362481	352376	291489	308866	267762	261914
2-Phenyl-1,3-propanediol monocarbamate	5.2387	195.09	231111	251000	411396	267468	248982	221946	216141	305564
2-sinapoyloxy-3-butenylglucosinolate	17.7201	595.102	374850	425307	536339	376255	411924	387219	386999	417446
3-(4-Hydroxyphenyl)lactate	9.18722	182.058	7.56448e+06	7652242	10651538	9199139	8437318	8581901	8153248	8698180
3-(4-Hydroxyphenyl)pyruvate	8.15388	180.042	198289	133502	166184	151644	142734	200384	190066	129710
3,4-Dehydrothiomorpholine-3-carboxylate	7.64503	145.02	266332	398674	617240	290978	337073	336040	252766	219177
3,4-dihydroxybenzylamine	7.79622	139.063	94285.3	89185	113432	89277.4	99696	117196	94791.6	95274.1
3,4-Dihydroxyphenylacetaldehyde	7.45627	152.047	265472	206806	255534	279492	211447	285315	206071	95041.3
3',5'-Cyclic AMP	9.38139	329.053	226236	242494	309261	293498	414386	421952	377082	400871
3,7-Dimethyl-2E,6E-decadien-1,10-dioic acid	4.12676	226.12	513879	648150	533157	552549	523642	562008	510432	551842
3-[4-amino-3-hydroxybutyl]-hydroxy-carbamoyl-propanoate	11.5864	220.106	251351	344262	388008	240655	313499	311442	320759	309732
3-Aminobenzenesulfonate	7.36749	173.015	0	0	0	0	0	0	0	0
3-Butylidene-7-hydroxyphthalide	3.83607	204.079	633998	598108	557064	760312	552945	618244	579115	728554
3-Butynoate	13.4327	84.0211	636743	522020	743288	770225	695488	877101	715935	567606
3-carboxy-4-methyl-5-propyl-2-furanpropanoic acid	4.15095	240.1	334479	370435	238936	230515	208810	184894	319272	301408
3-Dehydroquinate	11.1022	190.048	637924	495264	757211	474667	570958	810763	443220	300354
3-Dehydroxycarnitine	9.22064	145.11	52436.3	53693.5	104254	49304.4	58089.3	74889.8	48195	40075.4
3-deoxy-D-galactose	10.9368	166.084	95807.2	79878.7	134767	89629.8	91225.7	117451	82509.9	68394.1
3-Deoxy-D-glycero-D-galacto-2-nonulosonicacid	13.6901	268.08	0	29593.8	40702.3	51454.7	0	62461.7	47509.2	0
3-Dimethylallyl-4-hydroxymandelic acid	4.44208	236.105	185151	225208	210338	210300	173491	161869	152831	189756
3-Ethylmalate	13.3665	162.053	246068	492422	243942	242293	280467	268372	201277	185866
3-Hydroxyanthranilate	11.9956	153.043	105773	118925	167378	135801	197159	149272	145739	147181
3-Hydroxydodecanedioicacid	4.29395	246.147	233997	180211	219142	156291	317501	154856	153161	169596
3-Hydroxyisoheptanoicacid	7.46239	146.094	353348	324526	383628	324604	323355	290344	349456	280953
3-Hydroxy-N6,N6,N6-trimethyl-L-lysine	20.0495	204.147	177729	222118	328715	291836	357182	399601	381240	345455
3-Isopropylcatechol	3.93959	152.084	289065	407408	533980	585179	455689	341371	539127	310118
3-Ketosphingosine	3.8791	297.267	1201528	1.28858e+06	1.19921e+06	1.39792e+06	1.22326e+06	972544	1.22145e+06	1.14876e+06
3-Methyl-2-oxobutanoic acid	7.39708	116.047	1236380	1.16822e+06	1.95693e+06	1.41703e+06	1.63782e+06	1626325	1.46817e+06	1251502
3-Methylbutanoic acid	7.42781	102.068	7.38181e+06	8.15796e+06	9953832	7.82429e+06	8666692	8705282	8324916	9701972
3-Methyleneoxindole	9.58663	145.053	183618	220178	264354	185720	267320	200868	258098	233546
3-Methylguanine	9.35652	165.065	1618786	1.39164e+06	1.80842e+06	1.37281e+06	1.40644e+06	2183575	1.17821e+06	1.22317e+06
3-nitro-2-butanol	9.47521	119.058	962419	1.06625e+06	1.48303e+06	1.33733e+06	1.48314e+06	1265770	1.54134e+06	1.49145e+06
3-nitro-2-pentanol	7.5542	133.074	7.66073e+06	7.40684e+06	13521587	10401066	9819599	9268190	8690378	10003638
3-Oxo-delta4-steroid	4.00429	272.214	1.14436e+06	1.02377e+06	1.05988e+06	955778	952021	745729	878948	643464
3-Oxododecanoic acid	3.9665	214.157	492656	660079	609706	693315	680896	470044	412652	450046
3-oxopimelic acid	4.22462	174.053	563812	526144	317013	747550	516146	863440	798833	662437
3-Oxopropanoate	9.85287	88.0161	409874	218811	329660	257412	271268	392594	183088	234095
3-Oxosteroid	4.06624	274.23	416751	316921	234327	384727	289033	324781	339001	218138
3-Phospho-D-glycerate	17.157	185.993	3.08653e+06	5.80761e+06	6101323	2741719	4979155	2372384	3.15026e+06	2.89667e+06
3-Phosphonopyruvate	12.9197	167.982	100759	76877.6	101756	235008	204105	205383	151893	204564
3-sulfopropanoate	16.9635	153.994	1.04102e+06	1.23954e+06	1.17481e+06	963750	1.17687e+06	1.0693e+06	777589	1.04701e+06
3-Ureidoisobutyrate	7.61302	146.069	2304948	2.60063e+06	3405168	3.03465e+06	2.85502e+06	2.54678e+06	2.95845e+06	2.6863e+06
4-(beta-D-Glucosyloxy)benzoate	10.5469	300.084	144528	174891	214989	253571	208364	296779	200692	302725
4-(Trimethylammonio)but-2-enoate	12.8435	143.095	323417	318858	514383	368636	322520	395020	294504	338621
4,5,6,7-Tetrahydroisoxazolo(5,4-c)pyridin-3-ol	10.413	140.059	225277	264485	300353	263559	278370	318261	257740	276991
4-fluorotryptophan	10.5381	222.081	1.26738e+06	1.32375e+06	1.0354e+06	1.5116e+06	1.25848e+06	2.05839e+06	2.11981e+06	2.08888e+06
4-Guanidinobutanoate	14.6657	145.085	949609	807017	972571	826598	1.03711e+06	1.24224e+06	1.20762e+06	849487
4-Heptyloxyphenol	3.89393	208.146	11055371	11390052	11561047	11760110	10894376	9121484	10448104	10951146
4-Hydroxybenzaldehyde	5.98458	122.037	1.27676e+06	1160184	1.3589e+06	1.01627e+06	1018519	982392	1.06563e+06	1.62055e+06
4-Hydroxycinnamyl aldehyde	4.10468	148.052	460699	578690	430555	321737	390206	318734	437214	339851
4-Hydroxyhexan-3-one	7.34347	116.084	1.36845e+06	1.41576e+06	1.28052e+06	1337542	1.4801e+06	1.49133e+06	1.27373e+06	1.43029e+06
4-Hydroxyphenylglyoxylate	16.7187	166.027	1.10241e+06	1.27278e+06	1.09688e+06	1.02042e+06	970224	980990	949376	1.07394e+06
4-Imidazolone-5-acetate	13.5078	142.038	452751	459927	512207	436140	496035	416321	482736	443851
4-Imidazolone-5-propanoate	8.37095	156.053	17982620	19611434	16029499	12050605	13228264	9186209	9283952	7.03575e+06
4-Methyl-2-oxopentanoate	4.54753	130.063	18079406	16199477	26376504	23817140	27670730	24837338	25471442	20487460
4-Methylene-L-glutamine	9.04369	158.069	123225	123752	135377	119654	143849	132986	133937	148794
4-methylthiobutanaldoxime	10.2936	133.056	532684	654150	890543	556602	633564	822520	462197	597822
4-Methylumbelliferone glucuronide	13.5575	352.08	1.67899e+06	419256	598210	1.54193e+06	1.45445e+06	992641	1.57686e+06	1.83421e+06
4-Nitroaniline	7.56424	138.043	2.20442e+06	485834	686613	383312	276764	308458	142978	268916
4-oxo-4-(3-pyridyl)-butanoate	8.31403	179.058	12730312	9944935	14545997	11913445	11924070	15145975	10130197	9253421
4-Oxoglutaramate	10.7275	145.038	215654	180769	332246	232946	364096	309993	251717	260581
4-Propylphenol	4.133	136.089	794984	846137	806585	799077	761031	712822	900668	727716
4-Toluenesulfonamide	10.1124	171.035	0	0	0	76120.1	54612.5	142287	86826	156181
4-Trimethylammoniobutanoate	12.6701	145.11	4.81745e+06	5.07564e+06	7809206	6.20315e+06	6972619	6573014	6.41738e+06	6.8882e+06
5,3'-Dihydroxy-4',5'-dimethoxy-6,7-methylenedioxyisoflavone	7.46345	358.069	6.17215e+06	7422707	6158227	4.96711e+06	5212964	5.175e+06	4377871	5474042
5,6-Dihydrothymine	14.1963	128.059	1.89323e+06	2148021	2.28753e+06	1.78826e+06	2797553	2.5008e+06	2.04936e+06	2184019
5,6-Dihydrouracil	12.443	114.043	210680	199143	198686	101835	221433	214930	216487	164676
5-6-Dihydrouridine	9.83251	246.085	557275	546336	686193	496548	618199	704725	445514	660510
5-Acetamidopentanoate	7.46034	159.09	1.81323e+06	2.04227e+06	2.66049e+06	2.11308e+06	2579490	2.46284e+06	1.87654e+06	2430081
5-Dehydro-4-deoxy-D-glucarate	20.2932	192.027	1.19468e+06	1.65906e+06	1.7086e+06	1.67456e+06	2.07332e+06	1.92051e+06	1.84388e+06	1918170
5-Guanidino-2-oxopentanoate	13.9876	173.08	974470	901134	784396	1.04578e+06	782521	739898	1.16322e+06	917190
5-Hydroxyconiferaldehyde	4.52985	194.058	145233	243275	216478	173483	155325	147621	142029	186083
5-Hydroxyferulate	7.45802	210.053	9211520	10931616	11515321	8432801	9171111	8568635	6517057	8440595
5-Hydroxymethyldeoxycytidylate	11.3271	337.068	106448	120512	162912	104437	116415	119227	77567.7	94734.9
5-Hydroxypentanoate	7.4644	118.063	1.6011e+06	1.52078e+06	1.74464e+06	1.2684e+06	1.37034e+06	1.69838e+06	1.17408e+06	1.41271e+06
5-Hydroxytryptophol	11.0316	177.079	230203	197653	323638	283800	293812	313536	223238	263939
5-L-Glutamyl-taurine	15.5921	254.057	275512	369483	447856	411489	402762	373254	341475	386859
5-Methyltetrahydropteroylpentaglutamate	20.0932	487.678	812421	920982	1.58207e+06	1.50924e+06	1.56892e+06	1.56314e+06	1.47582e+06	1.61548e+06
5'-Methylthioadenosine	6.00965	297.09	601797	648494	929888	1.01742e+06	898497	1.27653e+06	857349	977463
5'-methylthioformycin	7.45563	297.09	10956183	11895991	17708174	18022512	16501150	22643718	17458674	20480176
5-O-Methylembelin	3.74142	308.199	10622932	12810413	13447494	16781640	11297448	10257283	12761131	8892028
5-Oxoproline	10.2592	129.043	65327808	66888264	99608624	66703004	71133808	92032016	65376868	59064660
6-(Allylthio)purine	8.34234	192.047	4.44109e+06	4.66563e+06	3.48615e+06	2.98311e+06	3204570	2151805	2.40145e+06	1.60952e+06
6-Acetamido-2-oxohexanoate	7.87813	187.085	247081	246172	316570	247041	244101	250390	214071	235244
6-Amino-2-oxohexanoate	8.85601	145.074	465866	399639	628355	474391	522988	638774	409431	410100
6-Hydroxytremetone	3.89542	218.094	478698	711265	537626	597042	525496	380078	609142	379586
6-isobutyl-4-hydroxy-2-pyrone	7.32061	168.079	163348	153844	197531	164790	145338	151808	227048	195659
6-Keto-decanoylcarnitine	4.53143	329.22	1.14376e+06	1.35578e+06	1.60924e+06	392506	1.15073e+06	381107	272263	293179
6-Methoxytaxifolin	9.38868	334.069	66590.8	61144.1	97987.6	72392.7	97050.6	80060.3	100489	99689.9
6-Phospho-D-gluconate	17.9317	276.025	379166	38436.1	45147.2	361425	528671	453602	478912	562040
7,8-diketopelargonate	4.52783	186.089	5034533	5589842	5815408	5577849	4.83195e+06	5114723	4479503	5.34766e+06
7-Hydroxy-3-(4-methoxyphenyl)-4-propyl-2H-1-benzopyran-2-one	8.43262	310.12	235743	252017	366443	343481	533687	340391	461209	400219
7-Methyl-2-hydroxy-6-oxoocta-2,4-dienoate	4.57073	184.073	392345	374726	263146	412334	308759	354909	258317	332672
7-Methylguanine	12.2904	165.065	181581	257910	386122	276019	285252	317289	355968	340461
8-(3,3-Dimethylallyl)-3-methylgalangin	8.49305	352.13	41416.1	50586.5	133040	83280.7	119469	107594	122463	68921.4
8-Amino-7-oxononanoate	7.46541	187.121	19478212	20948410	21871018	14737995	16688452	15572629	13813256	18392048
8-Epiiridodial glucoside	4.39187	330.167	131457	188762	193749	213888	154729	109076	115314	94861
9-Oxononanoic acid	4.40387	172.11	1902752	2.028e+06	1969687	2.0975e+06	1812736	1844076	1.7165e+06	2.31108e+06
9S,15S-dihydroxy-11-oxo-15-methyl-5Z,13E-prostadienoic acid	3.609	366.24	1.46722e+06	1.53839e+06	1.66625e+06	1.72245e+06	1.62856e+06	1.26629e+06	1.40562e+06	1263649
9S,15S-dihydroxy-11R,18-diacetoxy-5Z,13E-prostadienoic acid	3.80232	454.256	3.52674e+06	3756217	3.76936e+06	3.16973e+06	2949550	1.50239e+06	2.44674e+06	1.9985e+06
Acetoacetate	13.1	102.032	98243.4	110391	117287	130197	109736	133644	93488.9	129209
Acetone cyanohydrin	14.1728	85.0527	1.45387e+06	1.32137e+06	1.39796e+06	1.36703e+06	1.07768e+06	1.52882e+06	1.28315e+06	1.0301e+06
Acetyl-CoA	11.9874	809.127	1.45275e+06	1.49445e+06	1.66492e+06	1.42111e+06	1.50879e+06	1.58355e+06	1.98279e+06	1.16857e+06
Acetylglycine	9.6299	117.043	321806	290752	458375	426509	483635	375305	409551	418403
Acetylpseudotropine	7.45574	183.126	2.12095e+06	2.06129e+06	1.91424e+06	1.55497e+06	1.61978e+06	1.68693e+06	1.41403e+06	1987378
acidomycin	4.46426	217.077	377426	351649	417235	352847	389860	474943	429969	460289
Adenine	9.12591	135.054	6133559	406373	827719	5.97738e+06	7.59913e+06	2.16888e+06	2.40235e+06	2310073
Adenosine	8.5548	267.097	8.20591e+06	2.33543e+06	3.14171e+06	12944611	8668321	36924356	22579208	35606660
ADP	14.9301	427.029	4.64821e+06	5891257	7103705	5.09247e+06	6970799	5.35889e+06	2572280	4.91623e+06
Ala-Ala-Ala	11.6336	231.122	178652	96471.9	116943	116735	147231	85168.7	57774.3	61548.3
Ala-Ala-Ala-Asp	14.2822	346.149	33607844	21802914	28620320	19044006	25563430	12520973	8550637	4347354
Ala-Ala-Ala-Ser	17.485	318.154	253413	328715	375628	290410	338915	330350	329615	396934
Ala-Ala-Asp-Cys	17.0966	378.121	164932	194120	272736	225473	199897	144357	183560	204290
Ala-Ala-Gly	12.4551	217.106	14116575	7.92225e+06	10450211	9844985	9623897	10369729	20418082	4220109
Ala-Asn-Ser	16.6026	290.123	233727	303527	310599	369504	299435	326275	334979	363868
Ala-Asp-Cys	16.8252	307.084	4451278	5.24256e+06	6.54143e+06	6.49693e+06	3.43456e+06	2.84605e+06	3.58751e+06	3.72885e+06
Ala-Asp-Gly	15.657	261.096	376789	389673	562047	363178	471968	367384	359515	332033
Ala-Asp-Pro-Pro	12.9898	398.18	199800	121243	180068	241399	245070	248174	199958	223308
Ala-Glu-Asn-Glu	11.9323	461.176	217888	125604	222040	152040	172076	222328	137147	80749.2
Ala-Gly	15.324	146.069	57261680	53038648	77483280	64957356	73381608	111767840	98913936	54132024
Ala-Gly-Pro	10.2604	243.122	1.93783e+06	1.31928e+06	1.88106e+06	1.26671e+06	1.51975e+06	2.21788e+06	1.25302e+06	899472
Ala-Leu-Met-Ser	8.82279	420.204	1.32137e+06	899247	1.31081e+06	993635	1.13193e+06	1.52316e+06	930342	872236
Ala-Leu-Thr-Ala	18.2779	187.108	469842	527414	705487	477948	653367	696604	476872	589944
Ala-Lys-Asn-Pro	11.2532	428.238	98752.6	127139	169238	132732	136360	198548	142062	152763
Ala-Lys-Asp-Pro	13.6208	429.222	462039	507751	526363	710483	604756	501505	734521	784034
Ala-Met-Thr-Pro	8.6617	418.189	310672	249057	333823	242043	210368	356242	171146	167208
Ala-Met-Val-Pro	8.31721	416.209	168992	191137	165163	169162	175458	145409	163764	148400
Ala-Phe-Val-Asp	7.91571	450.211	128713	113917	214738	154624	181854	162924	192995	119129
Ala-Pro	11.822	186.1	288079	349774	482820	364750	353662	302299	244237	318502
Ala-Ser	12.6639	176.08	87187.3	103782	140069	102351	97346.6	108284	89698.5	80999.8
Ala-Thr-Ala-Ala	12.3697	332.17	603764	374593	586533	417600	413073	472031	333500	197288
Alliin	8.20426	177.046	261637	398422	641292	419866	465573	424665	372968	282882
allopurinol	10.559	136.038	4291010	5.56664e+06	7077334	3.3723e+06	4.88347e+06	814037	1.93166e+06	1.73231e+06
allylcysteine	7.44423	161.051	5527772	6255860	11538635	6004254	7932398	6.92902e+06	7119701	3.60016e+06
alpha-aminopimelate	8.97244	175.084	168421	265891	391833	159685	221112	181714	127791	105607
Amaralin	3.98968	264.137	347363	407281	401904	292889	452648	407379	418746	418751
AMCC	9.73176	220.052	3040816	3246205	2.25326e+06	2.77491e+06	2311116	1.93198e+06	1.41986e+06	1.87553e+06
Aminoimidazole ribotide	16.229	295.057	438625	292265	417060	100384	390221	219709	347971	231844
AMP	13.5591	347.063	6.35717e+06	1.35401e+06	1.78219e+06	5461447	6.53405e+06	4.68687e+06	5908517	6.97029e+06
Anthranilate	11.2286	137.048	690001	3.06835e+06	762047	724002	769115	785611	566025	507410
Apiole	4.09885	222.089	358842	573731	636093	364338	461048	427469	298635	332011
Arbutin 6-phosphate	15.4811	352.055	178925	383051	301538	323940	411736	376411	435592	457079
Arecoline	7.8914	155.095	894239	1.01063e+06	987166	748666	849609	762116	586379	761490
Arg-Asp-Asp-Gly	17.7283	461.187	105724	120877	164672	115334	159539	144416	150000	115570
Argininicacid	15.0296	175.095	1.11256e+06	830492	877944	852980	550177	551582	680119	798213
Arg-Thr-Gln-Tyr	21.821	566.281	1.30599e+06	1677663	1.6881e+06	1.1985e+06	1.35434e+06	1.39942e+06	1.20574e+06	1.16958e+06
Arnicolide A	3.51519	306.147	126145	266538	148091	171660	258680	293759	328532	355267
Ascorbate	14.5546	176.032	514871	669860	1.10292e+06	801314	803262	724405	589470	648367
Asn-Asn-Pro	12.7519	343.149	189849	221701	287969	206041	274792	242518	196116	211980
Asn-Cys-Cys	11.1388	338.071	312596	537815	538404	542623	611724	464973	51556.6	228407
Asn-Glu-Ile-Pro	13.5067	471.233	220779	202222	342567	291861	305381	245266	370448	371214
Asn-Gly-Pro	12.8054	286.128	163445	179711	299920	179010	239921	200554	153322	193840
Asn-Leu-Asn-Tyr	15.587	522.243	649237	432165	471044	394443	494781	555866	378488	239752
Asn-Lys-Cys-Cys	13.0868	466.167	295344	360507	480849	387786	317617	385124	291053	464397
Asn-Met-Cys-Pro	13.0652	463.157	969089	741910	914605	884378	794426	862231	759165	664911
Asn-Met-Gln-Pro	8.63488	488.206	127133	0	0	180498	140085	579636	286480	502420
Asn-Val-Asn-Ser	8.75193	432.196	510223	633493	547023	562464	419057	540592	556008	639187
Asp-Arg	17.7934	289.139	349292	352002	455909	374331	450589	415901	425862	398878
Aspartyl-L-proline	15.5359	230.09	1.42804e+06	1.59239e+06	2.01669e+06	1.50775e+06	1.87428e+06	1.81048e+06	1.54959e+06	2.02514e+06
Asp-Cys-Cys-Gln	15.7616	467.114	0	0	0	0	0	0	0	0
Asp-Cys-Cys-Ser	16.936	426.088	11372702	10248595	8904615	2.36967e+06	5508127	3.00045e+06	1.99228e+06	660808
Asp-Gln-Gln-Pro	21.3815	486.207	140680	194043	275727	166670	204125	214819	192697	190191
Asp-Gly-Arg	17.38	346.16	221226	230919	340454	276382	266273	275609	203530	324840
Aspidinol	4.12779	224.105	8816849	8263926	9310467	11474105	9978662	8804302	11175024	9415709
Asp-Met-Asp-Gly	15.8016	436.127	1.4203e+06	1.58913e+06	4814000	4.41415e+06	5372847	2.75597e+06	4.06042e+06	3.52634e+06
Asp-Thr-Cys-Cys	16.479	440.103	197289	65821.1	54901.9	62874.4	51303.2	114222	45409.9	0
Asp-Thr-Cys-Tyr	12.1002	500.158	98158.2	54145.1	65363.9	59404.3	61852.1	72030.9	50330.8	31935.8
Asp-Thr-His-His	13.4825	508.202	272144	257432	415425	294601	416433	393179	379739	346630
Asp-Thr-Trp-Pro	13.8596	517.216	1786505	1931276	3144985	1.65312e+06	2572549	4.71954e+06	3.23415e+06	3.04558e+06
ATP	16.4572	506.995	25600196	31662630	32554202	20753080	28194220	25784214	21415078	25261370
Azelaic acid	10.8396	188.105	401762	296319	372875	254907	471564	380765	178416	261849
Benzoate	7.46237	122.037	83910248	71889688	101277984	58995264	70154104	55556296	53224172	101189584
Benzyl (2R,3S)-2-methyl-3-hydroxybutanoate	3.82597	208.11	1.07972e+06	1.4005e+06	1.03954e+06	1.1068e+06	1.21009e+06	1.13438e+06	1.2107e+06	1.14708e+06
beta-Alanopine	7.92405	159.053	41070.4	99272.9	125799	213716	120849	247535	133894	270486
beta-Citryl-L-glutamic acid	20.3332	321.07	9547588	10849804	14692606	12735823	11957083	11834967	12048352	11772569
beta-D-Digitalopyranose	7.43738	178.084	2.57234e+06	2.14463e+06	2.22494e+06	1.78405e+06	1.83038e+06	2.15945e+06	1.62235e+06	1.9174e+06
Betaine	10.7945	117.079	16633970	14939785	20040494	17195414	17874834	20581974	16662425	15496106
Betaine aldehyde	27.7524	101.084	120341	147442	223860	268097	140283	267718	248540	267900
Biotin	8.5608	244.088	3.92382e+06	3.22206e+06	5256277	4.05111e+06	4.31279e+06	4.50401e+06	3.79075e+06	3.19807e+06
Bis(2-ethylhexyl)phthalate	3.6589	390.277	3.38044e+06	4.00725e+06	3.39547e+06	3.30244e+06	3.21966e+06	3.20045e+06	2848452	3.10534e+06
Botrydial	3.77009	310.178	77589560	79919808	77496904	71170200	74548264	62163604	62599276	66684688
Caffeine	4.82822	194.08	129188	136744	103610	107927	98378.7	99408.9	101807	107512
Cantleyine	4.56399	207.09	263425	216698	358439	275703	353118	306065	257078	294697
Caproylcholine	7.77087	201.173	365392	406345	461057	398013	405812	365299	301437	339015
Capryloylglycine	7.45422	201.136	2245960	2553604	2.32961e+06	1.91972e+06	1.92166e+06	2.0816e+06	1.62866e+06	2.15308e+06
CAPS	8.72607	221.108	138146336	142179104	143012272	140240608	135774464	135706560	122400496	139765488
carbidopa	8.02969	226.095	493861	341692	490827	517849	506258	514871	472948	484072
Carnosine	15.4634	226.107	399250	300517	385246	316636	396653	428676	314905	271340
Carnosol	4.13587	330.183	203410	0	0	0	2.54552e+06	90121.8	0	0
Carpacin	4.1298	192.079	387153	361617	469704	560404	459270	393162	532835	569450
CDP	17.057	403.018	1.06684e+06	1.50352e+06	1.98139e+06	1.39044e+06	2359612	1.45868e+06	900961	1690217
CDP-choline	14.9926	488.108	21812348	22960942	21034462	19120818	18660692	23765470	16699797	20234966
CDP-ethanolamine	16.1159	446.06	4272807	4495764	5.87311e+06	4.40633e+06	5575623	5773095	4400122	4849602
CDP-N-dimethylethanolamine	14.9696	474.091	582337	614910	605701	588499	407066	572806	531306	439515
CDP-N-methyl-L-glucosamine	12.7017	578.103	195775	233287	366768	487375	426266	581642	625378	525140
CHAPS	8.06683	614.396	173359088	170257152	161737536	168262224	166911488	160626896	149191568	164855904
CHES	11.4334	207.093	74199.5	86873.4	135108	90517.9	102075	130361	125328	134734
Choline phosphate	14.6579	183.066	1870603520	1860320128	1945225344	1960658944	1958173056	2015144064	1919998592	1904036864
chromate	21.3313	117.936	218851	192620	198088	198304	180682	175115	182095	193598
Cicutoxin	3.70623	258.162	5.48463e+06	4.816e+06	4.29918e+06	4.7548e+06	4.35504e+06	2794100	3.328e+06	3181425
Cinnavalininate	15.3299	300.038	380818	315998	490913	477728	555162	646948	711658	550468
cis-Aconitate	18.4502	174.016	1898047	2.6614e+06	3.21527e+06	3.12109e+06	4.3989e+06	3.60638e+06	4257947	4262887
Citrate	18.6339	192.027	17648888	27106890	30263102	31706564	39046928	33804384	42066892	42548604
CMP	16.0951	323.052	371283	335997	517408	322376	440917	450037	334673	351654
CMP-2-aminoethylphosphonate	14.9989	430.066	269832	221649	373345	431135	460367	450944	572373	418423
CMP-N-acetylneuraminate	15.1031	614.148	236348	277672	340268	334297	396198	413416	456400	435468
CMP-N-trimethyl-2-aminoethylphosphonate	14.0257	472.113	1.86544e+06	1.55966e+06	1.71721e+06	1.97154e+06	1.51935e+06	1.54896e+06	1.23964e+06	1.34025e+06
CoA	13.368	767.115	1.26853e+06	1.76906e+06	3190564	2.19512e+06	2.35248e+06	1.9325e+06	1.77242e+06	2.89192e+06
CoA-glutathione	17.0044	536.091	502038	409739	553934	637724	689636	759056	431445	606955
Convicine	18.7677	305.086	342195	406125	517333	493374	426509	390896	417621	433060
Coprine	9.72915	202.095	147438	120606	330441	254269	321363	289407	379821	342488
Creatine	14.283	131.069	546749568	560926528	703957696	590678528	702375936	650819776	601061760	647486336
Creatinine	9.36186	113.059	20320322	17188710	24908240	19621986	24534862	25138160	16193618	18859098
CTAB	7.51602	283.324	185975	305186	167859	120930	91773.9	223412	39125.9	134367
CTP	18.6105	482.984	1.45194e+06	2.04432e+06	1.98543e+06	1.03785e+06	2.44387e+06	1.60086e+06	1.63376e+06	1.9916e+06
Cycasin	11.4396	252.096	647561	400422	512068	398489	437134	703338	361953	202893
Cyclohexane-1,3-dione	4.44153	112.052	292126	104410	163847	297483	234666	314992	252803	281788
Cys-Cys-Gly	15.432	281.05	0	0	0	0	0	0	0	0
Cys-Gly	14.3336	178.041	1.28041e+06	1.53187e+06	2.06486e+06	1.75181e+06	1.7016e+06	1.89358e+06	1898462	2.007e+06
Cys-His	13.5796	258.079	930490	841074	2149949	894815	1.32069e+06	1.07142e+06	191445	472560
Cys-Leu-Cys-Pro	10.614	434.166	555710	664382	1.08268e+06	433300	541749	78741.9	193412	232667
Cys-Lys-Cys-His	20.0987	489.183	372727	374622	583437	479049	545149	774014	606538	649656
Cys-Lys-Gly-Pro	13.2897	403.19	726473	739773	679278	315537	374116	339437	191145	137391
Cys-Lys-Met-His	13.8455	517.215	77455.7	157777	292341	132089	246840	388485	232863	247591
Cys-Lys-Phe-Trp	23.8502	582.263	70008.8	44110.5	49740.9	26527.1	62075.3	52905.8	53728	31422.6
CysteineMercaptoethanol disulfide	11.4954	197.018	939756	715113	554279	174682	369558	183867	149852	66915.3
D,L-α-methylphosphinothricin	13.1171	195.066	638653	726838	922181	769893	977654	829822	785401	1.01978e+06
dADP	14.0284	411.034	407090	542938	676719	497868	834675	487805	300363	528928
D-Alanyl-D-alanine	11.8431	160.085	138354	164617	188597	112623	113289	136749	92676.9	114231
Dalpalatin	4.58569	358.069	1.95042e+06	2.09809e+06	2.02346e+06	1.85621e+06	1.74432e+06	1.76447e+06	1.44562e+06	1889674
Daminozide	7.46972	160.085	6.34847e+06	7178154	10147801	6059944	6872214	4.97117e+06	6332170	6037046
dAMP	12.5691	331.068	256329	233425	256431	176814	270134	283787	246813	311536
D-Apiitol	9.95985	136.074	556006	593977	611235	578364	499392	475369	447400	529631
dATP	15.6083	491.001	722594	845519	1.13332e+06	770736	989370	939215	1.11444e+06	1.01988e+06
d-biotin d-sulfoxide	7.44554	260.083	854170	1.07207e+06	795807	1.08503e+06	720578	520271	370062	407376
Decanoic acid	3.87478	172.146	3.34972e+06	3.13651e+06	3.49099e+06	2.4725e+06	2.84689e+06	2741882	2749417	2.76164e+06
Dehydrophytosphingosine	4.0922	315.277	375945	277444	391881	246196	325378	292959	283072	352533
Dehydrovomifoliol	4.16188	222.126	1.31097e+06	1289168	1.12768e+06	1.29897e+06	1.16489e+06	1.08562e+06	1.1064e+06	1.34478e+06
dehypoxanthine futalosine	13.9222	296.09	5293023	5585814	7.04339e+06	5.38715e+06	6.97934e+06	7617999	6681467	7293218
Delcosine	3.69112	453.273	4.20105e+06	4.52333e+06	3.09355e+06	3601614	2.93472e+06	2.11663e+06	2.35513e+06	2.25927e+06
Demethyltorosaflavone D	4.84727	356.053	175269	165966	158505	172571	181362	272660	171220	100434
Deoxycytidine	9.82199	227.091	662446	529461	904741	772881	725966	787512	540933	647388
D-Erythrose	14.2548	120.042	620679	471888	734506	456100	510859	668597	395277	325116
D-Erythrose 4-phosphate	12.9274	200.009	169913	169880	164063	519681	322443	442764	329758	432789
Dethiobiotin	8.72338	214.132	203031	267664	392496	223012	270619	270874	248659	241650
D-Fructose 1,6-bisphosphate	18.3627	339.996	236836	377371	181281	115293	267731	167544	150206	183744
D-Fructose 6-phosphate	16.1328	260.03	2.05966e+06	1945136	2.59296e+06	1.72096e+06	2.61215e+06	1.94086e+06	2.30496e+06	2.21142e+06
D-Galactose	13.5016	180.063	1.181e+06	1.39343e+06	1.5082e+06	992727	1.17242e+06	1238344	1.11894e+06	877343
dGDP	16.3747	427.029	2.56723e+06	3.36653e+06	3215929	1.95165e+06	2945968	2.4193e+06	2.07212e+06	2.59232e+06
D-Glucarate	17.3689	210.038	773772	764979	952191	461460	705108	499469	659740	499322
D-Gluconic acid	14.3594	196.058	9269177	9158490	15690084	12012059	10039581	8576680	9523389	8618760
D-Glucono-1,5-lactone	15.5125	178.048	172345	171345	158627	147953	264364	174165	134047	139270
D-Glucono-1,5-lactone 6-phosphate	17.9192	258.014	114012	0	0	91694.6	126739	121317	121046	143102
D-Glucose	16.9743	180.063	14520001	15140979	20585636	15364177	18927796	15513895	17631050	15509615
D-Glucose 6-phosphate	16.8993	260.03	5.22224e+06	4.96855e+06	4.60272e+06	3359388	5895284	4564180	4.93965e+06	4699779
D-Glutamate	16.9948	147.053	1.32494e+06	1.38422e+06	1.86736e+06	2.00711e+06	1.6475e+06	1.51381e+06	1.88279e+06	1.87667e+06
D-Glutamine	13.1652	146.069	5688853	4.04743e+06	4697149	4.07263e+06	4335350	4074914	3.12245e+06	2.42183e+06
D-Glyceraldehyde 3-phosphate	16.2925	169.998	655516	680324	1.10062e+06	712993	969806	788585	938448	906075
D-Glycerate	12.4728	106.027	123837	131245	138327	136352	162966	120070	102410	96828.1
Di(2-ethylhexyl) adipate	3.56066	370.308	824176	911504	968505	1.04674e+06	796390	784998	891083	777354
Diethyl (2R,3R)-2-methyl-3-hydroxysuccinate	4.15027	204.1	600274	615413	823077	646083	726063	929425	864513	698465
Dihydro-3-hydroxy-3-(1-hydroxyethyl)-4-methylfuran-2(3H)-one	4.55581	160.074	173124	218895	224239	207125	236114	187734	198440	182122
Dihydro-4,4-dimethyl-2,3-Furandione	4.56144	128.047	291858	239649	332682	334623	285452	301121	283245	349076
dihydroartemisinic acid hydroperoxide	3.88235	268.168	766764	803815	702868	701810	679945	648891	678610	680415
dihydrocamalexate	10.8348	246.046	339434	499817	364677	208309	317587	227427	171922	159712
Dihydrogenphosphate	14.5528	96.969	237044	494947	527533	556410	522405	504481	500329	552995
Diisononyl phthalate	3.67999	418.309	792875	759532	1.00095e+06	1.03547e+06	996864	863716	699529	758905
Diisopropyl adipate	7.51942	230.152	106495	120628	119521	119591	263599	101335	88076	110517
Dillapiole	7.34747	222.089	404663	430085	430149	384710	397824	473263	414132	399722
Dimethyl adipate	4.57029	174.089	1.55811e+06	1.41603e+06	1.459e+06	1.53427e+06	1.49862e+06	1.27015e+06	1.25482e+06	1.42381e+06
Dimethyl citraconate	4.30344	158.058	19447928	20104560	19266828	20387854	22796424	28865348	27538756	24633360
Dinor-PGE2	3.83405	324.194	3.99848e+06	3601230	4.23966e+06	4479800	3739398	2.28915e+06	3.34278e+06	2.07729e+06
Dipropyl disulfide	8.18959	150.054	176906	230503	229987	189350	244591	282183	229174	246132
DL-Methionine sulfone	11.9967	181.041	190649	175589	176486	146699	177345	192218	160947	120211
DMSP-amine	12.3911	119.077	7117611	6.45057e+06	7.85236e+06	7.01438e+06	4.8657e+06	6.36031e+06	4.42464e+06	5.7155e+06
D-myo-Inositol 1,2-cyclic phosphate	16.133	242.019	507126	427970	493697	363574	543979	406181	442686	497526
Dodecanedioic acid	4.58058	230.152	258368	273314	260423	236659	370544	251127	181289	254439
Dodecanoic acid	3.76907	200.178	23406320	22717484	20414714	20070238	18004004	16980832	16293786	13135361
D-Ribose	12.4201	150.053	1.22314e+06	1.25991e+06	1.74978e+06	1.59512e+06	1.38677e+06	1.35637e+06	1.2172e+06	1.29227e+06
D-Ribose 5-phosphate	15.5788	230.019	1.50311e+06	3.18725e+06	1.8111e+06	897369	994794	798835	893553	905133
D-Sedoheptulose 7-phosphate	16.2498	290.04	876284	719918	1.10298e+06	664811	936110	640298	905415	824455
D-Sorbitol	13.6464	182.079	4.35949e+06	3804175	4.48765e+06	4.61432e+06	3770411	4.30641e+06	3.35228e+06	3056635
D-Thevetose	5.94935	178.084	1.77962e+06	2013902	2.06065e+06	2.05859e+06	1.79577e+06	1767946	1.6902e+06	1.83428e+06
dTTP	16.0723	481.989	899781	1103616	1.39521e+06	921562	1.19808e+06	1.11097e+06	1.08277e+06	1.22778e+06
D-Xylonate	13.7637	166.048	9791491	10365539	15062566	10662337	12236371	11859369	7.75533e+06	10384335
D-Xylonolactone	15.4331	148.037	19568916	23882458	37734208	37981296	39217484	32556878	46887228	40497476
Elaeokanine C	7.32233	211.157	500305	629517	826916	436406	434350	555280	427850	508115
Embelin	7.29544	294.183	1.10421e+06	1132145	1.09904e+06	1.1989e+06	1.103e+06	1.12388e+06	1.07438e+06	1.07799e+06
Epsilon-(gamma-Glutamyl)-lysine	17.7783	275.149	122677	105261	177915	115536	131822	144249	92910.8	59782.4
E-pyridine-3-aldoxime	6.07854	122.048	5.22739e+06	5370666	8748212	6.19877e+06	6225341	7909815	6382244	5932488
Erythritol	11.6095	122.058	120727	97427.9	153102	107948	117923	152491	99671.6	86354.9
Erythronicacid	12.6811	136.037	7271695	7064497	11620716	10671416	10912033	10501571	11709942	18250046
Esculin	15.5469	340.079	523780	567355	676082	502687	836918	837625	781111	893096
Ethanolamine phosphate	15.4988	141.019	24467664	27852454	31887470	25885764	30890020	28138866	29702764	27958078
Ethyl (R)-3-hydroxybutanoate	4.55994	132.079	717815	569299	679922	634985	607641	747661	492534	485855
Ethyl (R)-3-hydroxyhexanoate	4.56513	160.11	463634	329142	422155	340519	301924	312896	257705	339221
ethyl propionate	3.7983	102.068	1.0849e+06	1.10985e+06	1.17852e+06	1.06748e+06	946201	661684	852346	848532
Ethyladipicacid	10.5481	174.089	207707	161287	199003	187449	204685	164193	131218	143571
Ethylphosphate	9.50438	126.008	219942	223017	325251	288524	284335	269761	278801	263215
Eugenol methyl ether	3.98111	178.099	599091	658165	682699	656161	602821	424393	553062	473894
FA (12:1) dodecenoic acid	3.85877	198.162	735569	825513	882779	1.02296e+06	633202	698995	717903	574932
FA (17:0)	3.62615	270.256	9765688	7.04387e+06	5.07134e+06	10207514	7.97452e+06	7314542	6.7287e+06	6281493
FA (20:0)	3.59085	312.303	5.63702e+06	4415326	2897174	5830573	4.88929e+06	4873300	5.03482e+06	4371249
FA (20:4)	3.82249	304.241	915764	597222	545741	566569	483457	205206	613801	316861
FA (8:0) octanoic acid	4.1425	144.115	5803399	4.47152e+06	6146514	3.56107e+06	5.67254e+06	4739589	5041450	4.77838e+06
FA dioxo(10:0)	4.27742	200.105	1.0567e+06	1.1129e+06	1.13696e+06	891176	868910	748847	705574	836824
FA hydroxy(10:0)	4.45553	188.141	1029225	670856	712312	611664	683617	598817	707990	588399
FA hydroxy(12:0) dodecanoic acid	4.0675	216.173	223001	166147	221762	253843	126390	106206	119946	119884
FA hydroxy(16:0)] hexadecanoic acid	3.74905	272.235	2.21675e+06	1.74575e+06	1.80903e+06	1.55592e+06	1.93443e+06	1.08896e+06	1.28464e+06	1.3391e+06
FA hydroxy(18:0)	3.67648	300.266	2.69376e+06	1485209	1.86658e+06	1.96469e+06	1.99522e+06	1.59378e+06	1.45605e+06	1.42256e+06
FA hydroxy(6:0)	7.37196	132.079	675130	571767	837185	613187	783059	816419	503953	494890
FA hydroxy(7:0)	4.4824	146.094	503960	523045	584049	442740	470910	423389	360853	495952
FA hydroxy(8:0) hydroxy-octanoic acid	7.45221	160.11	1.00325e+06	585409	744596	826525	610427	546957	460146	526344
FA hydroxy(9:0) hydroxy-nonanoic acid	4.15236	174.126	908110	983472	765121	805881	781434	698843	465589	722916
FA methyl(12:0) dodecanoic acid	3.74287	214.193	1.52016e+06	1.30695e+06	1.11639e+06	1.40418e+06	950278	983306	1.07207e+06	1.13529e+06
FA methyl(14:0)	3.66745	242.225	9657038	6001238	5216332	6.59755e+06	5442419	5.38705e+06	4.7136e+06	4.58673e+06
FA methyl(14:0) dodecanedioic acid	7.46136	244.167	394269	412708	462756	538119	727424	317546	309282	353091
FA methyl(15:0) tridecanedioic acid	4.54125	258.183	146485	183159	158954	131987	289896	133674	118662	136918
FA methyl(16:0)] tetradecanedioic acid	4.4203	272.199	114710	128194	130583	144645	168169	94529.3	66178.3	95738.8
FA methyl(16:1)	3.66545	268.24	2392236	913229	742152	1.26248e+06	507843	645151	680308	381229
FA methyl(18:0)	3.56973	298.287	1201493	1.09164e+06	458606	775119	839690	944530	834089	679346
FA methyl(6:0)	4.36983	130.099	2.85448e+06	2.15036e+06	3021941	1.78978e+06	2.63587e+06	2.30382e+06	2.43858e+06	2.53587e+06
FA methyl(8:0)	3.96951	158.131	9194360	8.29466e+06	10727603	6.94372e+06	10833911	8.16109e+06	9004850	11287737
FA oxo(10:0)	4.27128	186.126	517685	412523	435890	414698	385619	369044	281509	380523
FA oxo(12:1)	3.94734	212.141	1.44843e+06	1713317	1.77349e+06	1.48499e+06	1.55788e+06	1.05676e+06	1.27032e+06	1.37835e+06
FA oxo(14:1) cyclopentanebutanoic acid	3.93824	238.157	1.06834e+06	1.19441e+06	974735	1.02173e+06	962592	819999	927597	860136
FA oxo(16:0)	3.71579	270.219	5154643	4979204	4.99684e+06	4.8265e+06	4195002	3.18384e+06	3663280	3.24303e+06
FA oxo(18:0)	3.65337	298.251	7.68827e+06	6.64366e+06	6.57735e+06	6673811	6805896	3.50798e+06	4.70789e+06	4.01036e+06
FA oxo(19:0)	3.74648	312.266	1.52841e+06	1.50383e+06	1.38224e+06	1795151	1.64338e+06	2.32011e+06	2208286	1.90212e+06
FA oxo(8:0) oxo-octanoic acid	4.54647	158.094	1.1429e+06	1.32444e+06	1.16099e+06	1.22019e+06	985408	946738	866031	1.33691e+06
FA oxo(9:0) oxo-nonanoic acid	7.36073	172.11	332370	396290	463847	375253	466903	375660	323775	415610
FA(16:1)	3.64627	254.225	9984287	3.32792e+06	3.05367e+06	3786880	2549412	2.26607e+06	1.9513e+06	2.20481e+06
FAD	11.2375	785.157	1.76642e+06	1.65997e+06	2.40348e+06	1865527	2.15985e+06	2.07605e+06	1.87588e+06	2.12191e+06
Farrerol	7.45563	300.1	2748031	3.06781e+06	5349733	5541769	3.93964e+06	4668851	4.37129e+06	5.31024e+06
Ferulate	7.31665	194.058	608526	608893	588887	580353	615611	651666	609695	503258
FMN	11.1861	456.105	333199	376500	460601	211159	361638	171994	178175	175093
Folate	16.8006	441.14	516670	475595	479291	438974	427117	592173	378290	375297
formyl-isoglutamine	10.3449	174.064	227091	211177	378108	237450	296907	293798	285566	263981
gamma-Glutamyl-beta-aminopropiononitrile	10.6666	199.096	728404	778269	1.10687e+06	855148	1.02238e+06	1.01741e+06	834210	857221
gamma-Glutamyl-gamma-aminobutyraldehyde	11.9063	216.111	163924	132445	216349	181633	186485	154928	146962	128884
Gamma-Glutamylglutamine	15.1118	275.112	2.39173e+06	1.57798e+06	3.9068e+06	2498415	4.0254e+06	2851023	2.60707e+06	1.35875e+06
gamma-L-Glutamyl-D-alanine	14.3612	218.09	1.40632e+06	1.0019e+06	1.37554e+06	821560	1407813	950380	605817	582457
gamma-L-Glutamyl-L-cysteine	14.2808	250.062	7.01199e+06	5.64752e+06	8.22627e+06	5.08782e+06	7.11859e+06	5966170	3.91934e+06	2.07161e+06
gamma-L-Glutamyl-L-cysteinyl-beta-alanine	12.9561	321.1	548195	609266	799084	833168	871471	797368	618630	1.09028e+06
GDP	18.0908	443.024	606103	744978	656976	330629	633621	337063	193005	445769
GDP-3,6-dideoxy-D-galactose	12.7017	573.087	395385	479520	689672	915927	753033	1.12878e+06	1.06457e+06	933298
GDP-4-dehydro-3,6-dideoxymannose	16.4764	571.071	4.30813e+06	4920562	6225290	5001513	5222702	5320033	5.29572e+06	5.11314e+06
GDP-L-fucose	17.7214	589.082	436606	528171	674310	436840	525732	461588	452917	455012
GDP-mannose	18.3223	605.077	179683	198062	212986	171201	208303	147592	198435	203119
Gln-Leu-Lys-Tyr	15.8654	550.312	322438	320508	355337	244639	283175	288297	326354	267749
Gln-Pro	13.0194	243.122	347497	404045	537197	376320	354088	384663	373572	398636
Glu-Ala-Arg	13.5642	374.191	278249	244124	329505	370802	364411	270892	338380	306057
Glu-Arg	17.8031	303.154	5629352	3.89202e+06	7803784	4280373	6.12533e+06	5.40462e+06	3043780	1.52928e+06
Glu-Arg-Pro	13.3395	400.207	350586	405741	532349	570788	471382	529164	538060	474182
Glucosylgalactosylhydroxylysine	8.51067	486.207	43628.2	0	0	157599	113060	391570	251753	377856
Glu-Cys-Cys	16.9373	353.072	131860	122402	112672	28573.2	133435	83113.2	108637	98943.8
Glu-Cys-Gly	15.5833	307.084	2127691	2.36261e+06	2.22584e+06	2.78258e+06	2.50182e+06	2.7911e+06	2718131	3.80125e+06
Glu-Glu	16.8073	276.096	3.23816e+06	4.13372e+06	7441524	3.8216e+06	6.29066e+06	3.42158e+06	3.90113e+06	3333758
Glu-Glu-Met	12.6861	407.136	235412	229428	262188	256708	234210	263449	238434	287064
Glu-Lys-Asp-Pro	13.3072	487.228	353564	378952	556222	530115	553323	567123	662481	692186
Glu-Met	12.1145	278.094	296571	216737	474834	272029	418907	319253	205949	138243
Glu-Met-Ser	12.0948	365.126	2.65039e+06	4016403	7121858	5.52424e+06	6.55281e+06	5.97276e+06	6700636	7.6508e+06
Glutathione	14.325	307.084	162331264	184308064	276725408	245445360	252637760	257692160	300410720	325155200
Glutathione disulfide	17.2268	612.151	34042032	28316962	29628378	38612256	36720272	44787948	40936308	38211540
glutathione-sulfite	19.6546	387.041	3.82185e+06	1.72167e+06	1.81052e+06	3.46057e+06	2807624	2.998e+06	2.8714e+06	1833521
Glu-Thr-Thr	17.0268	349.148	598625	572758	886438	896419	712497	679302	846886	882564
Glycerol 1,2-cyclic phosphate	13.0853	154.003	122372	154225	174101	139506	134111	151725	141064	163634
Glycerone phosphate	15.5321	169.998	1.34815e+06	1972541	791726	2.78371e+06	1.33559e+06	2.68524e+06	3.22921e+06	2.94424e+06
Glycerophosphoglycerol	13.0568	246.05	14799461	14927523	18458518	15144448	14135964	15301024	12514346	13528644
glycerophosphoserine	15.3198	259.046	324691	344619	489361	451251	394506	445010	369048	443511
Glycochenodeoxycholate	4.2444	449.314	320642	294919	367107	291394	298785	360180	213507	241426
Glycyl-leucine	12.27	188.116	400914	437439	589518	478769	580065	627402	473247	464766
Glycylproline	12.9796	172.085	693314	752383	1.09836e+06	846429	839155	767879	815147	855912
GTP	19.8953	522.991	233304	294726	234229	91871.5	231888	99951.4	88572.3	152635
Guanidinoacetate	15.5954	117.054	419930	289582	519874	455622	613131	530853	643397	554478
Guanine	9.05323	151.049	302263	265498	341896	276292	299997	415638	287864	256689
Guanosine	12.2978	283.092	59943	68186.1	80356.9	52845.8	85279.7	112806	64206.4	69844.3
H2S2O3	21.8112	113.945	6.50611e+06	7.4983e+06	8448096	4.61286e+06	5.25397e+06	4.1595e+06	3346856	3781962
HEPES	10.7142	238.098	1.56274e+06	369979	286586	162335	244784	280109	228158	204689
Hexadecanoic acid	3.64631	256.24	575381440	444630368	358356448	608997824	491273120	433447680	450112928	419130880
hexanesulfonate	4.35858	166.066	138511	186208	194021	167385	151797	136488	129691	175350
Hexanoic acid	4.53092	116.084	6.57137e+06	5.6257e+06	8833769	5.17753e+06	6.54375e+06	6.0006e+06	6612921	6.67869e+06
Hexanoylcarnitine	4.07813	259.178	572289	558806	522707	479018	495599	459530	414770	452904
Hexanoylglycine	4.56616	173.105	376096	380991	530539	414212	533434	503388	421330	525190
Hexylamine	14.9452	101.12	653680	1.14272e+06	667399	553741	552864	385909	234008	254021
Hippurate	7.45441	179.058	9201827	6044262	9073040	6.3607e+06	7232295	8601309	4492180	4.07894e+06
His-Lys-Trp-Pro	23.6098	566.296	84595.9	102680	108069	98977.2	102125	108126	100128	101985
His-Met-Phe-Phe	12.1038	580.247	401868	310481	436510	365327	337037	419439	294866	352358
histidine methyl ester	12.8962	169.085	3.08755e+06	2.28153e+06	3.01422e+06	2.03427e+06	2661652	2866431	1.96638e+06	1.56685e+06
Homoarginine	22.2926	188.127	180362	152053	182824	124106	160828	204730	129679	94623.2
homodihydrocapsaicin	3.8652	321.231	1.14014e+06	1361559	1.02189e+06	1.04612e+06	1.01217e+06	610726	922453	611942
Homoisocitrate	17.2856	206.043	170586	169027	232883	153197	241534	205610	229757	206762
Homostachydrine	9.44526	157.11	243401	196147	334748	254377	227651	245855	162472	179317
Hydantoin-5-propionate	15.4625	172.048	298901	317390	294907	244625	249859	220871	238355	301134
Hydroxyacetone phosphate	11.8709	154.003	122173	100479	180538	120857	167882	119454	171075	137501
Hydroxymethylphosphonate	14.5488	111.993	340117	606100	465332	295885	447862	309016	318881	161410
Hydroxypyruvate	15.9955	104.011	254931	254390	279484	221159	524335	255378	214448	246241
Hypotaurine	14.8884	109.02	676835	807393	876789	635565	758289	508689	791320	809754
Ibuprofenacylglucuronide	5.05164	382.162	36672	33669.2	22832	79476.9	53299.3	58005.6	72932.2	65856.8
Ile-Ala	7.45943	202.132	1.03508e+06	1.29747e+06	1.15441e+06	882801	1.20424e+06	1.51608e+06	1.29865e+06	1.2373e+06
Ile-Ala-Ser	11.0061	289.164	383861	429693	359507	362973	376115	426548	354327	328753
Ile-Arg	12.014	287.196	396858	497363	585538	389036	419982	575077	430593	489323
Ile-Asn	9.77936	245.138	345798	271678	335092	217306	272263	311119	203398	194270
Ile-Ile-Pro	12.3676	341.232	990489	856238	1.27474e+06	1.0646e+06	993404	915237	782300	948350
Ile-Lys	20.0237	259.19	725387	710372	954094	821790	836237	1.12277e+06	746090	915998
Ile-Lys-Pro	20.4423	356.242	137838	167733	239356	172477	300465	258409	238046	250176
Ile-Lys-Ser	17.1781	346.221	149951	162929	217793	221561	229741	306327	255845	309786
Ile-Ser	8.24565	218.126	269321	297073	291384	202830	215876	296686	244678	233745
Ile-Thr	7.52393	232.142	693827	783739	664328	499712	542744	743679	596487	521008
Imidazol-5-yl-pyruvate	11.685	154.038	162879	189447	188383	151399	188836	225994	174783	202640
Imidazole-4-acetate	11.8523	126.043	159160	128750	181818	147436	271833	234758	206787	247200
Iminodiacetate	17.0519	133.038	231126	301699	758921	972772	892025	524411	1127647	796201
indigo	5.03067	262.075	144118	133338	152594	132066	128786	153888	113833	146667
Indole	9.76676	117.058	180289	143570	224240	191570	194218	218073	153364	152741
Indolelactate	7.99616	205.074	609207	621971	856007	611662	591185	742088	562071	648262
Inosine	10.5229	268.081	2.63332e+06	3.18931e+06	4315368	2108091	3.01979e+06	517905	1224238	1.02218e+06
Inulicin	3.75804	308.162	7115743	8008821	7375602	5.96306e+06	6076767	4759406	5.51301e+06	5432420
Isonicotineamide	13.7072	122.048	4443542	4391995	4.96294e+06	5.52382e+06	5552877	5.33854e+06	6451488	5.33062e+06
Isovalerylcarnitine	4.36122	245.163	328271	311239	218532	154982	320032	315225	228421	218960
Jasmone	3.97156	164.12	221076	422379	173777	307882	241172	167938	178641	201745
JSTX-3	4.27126	565.358	365964	305322	341545	607424	542303	514021	489053	616183
L-1-Pyrroline-3-hydroxy-5-carboxylate	14.5122	129.043	1.7992e+06	2.1112e+06	3.19256e+06	2.78402e+06	2.87838e+06	2.53784e+06	2.71691e+06	2.48199e+06
L-2-Aminoadipate	15.3631	161.069	96733	103563	86674.3	109703	64833.1	69605.8	75905.1	80399.6
L-Adrenaline	7.53814	183.09	820044	746120	1.10837e+06	1.12829e+06	753121	870412	776647	846030
L-Alanine	14.5733	89.0477	6.75871e+06	6932983	6916049	6.19564e+06	6.57429e+06	6375768	6.23693e+06	6082279
L-Arabinose	12.0184	150.053	266512	294509	411830	412461	397479	362431	361653	355229
L-Arginine	23.7756	174.112	123961936	99211136	117400552	87934208	107153152	130987480	87094408	63326364
L-Asparagine	15.3345	132.053	20311890	17461364	20444458	19854606	20966256	23067088	20860994	17350496
L-Aspartate	15.1264	133.038	12245016	11000646	12507930	10932532	12988092	13324331	11633788	9953848
L-Aspartate 4-semialdehyde	10.6598	117.043	966458	993725	1.69285e+06	1.29802e+06	1.46021e+06	1.33133e+06	1.23063e+06	1.2392e+06
L-beta-aspartyl-L-alanine	15.5618	204.075	282875	282649	366652	311940	319628	258911	305555	397757
L-beta-aspartyl-L-leucine	12.6113	246.122	114009	170615	205701	186262	167533	217758	160362	153606
L-beta-aspartyl-L-threonine	15.5584	234.085	391288	462740	488190	428346	451792	423457	357091	411765
L-Carnitine	12.7291	161.105	19604654	22264722	30219700	27625880	29480128	31126606	26405814	32576958
L-Citrulline	15.5976	175.096	2.49009e+06	1.80432e+06	2.22737e+06	1.78491e+06	2.05618e+06	2.26661e+06	1.39843e+06	1.33412e+06
L-Erythrulose	11.4804	120.042	98091.3	96999.7	103763	89102	98785.9	99571.2	77255.9	76243.4
Leu-Ala	11.4175	202.132	820579	947636	1.24394e+06	1.10969e+06	1.26736e+06	1.33418e+06	1.13758e+06	1.2649e+06
Leu-Lys	12.0197	259.19	146941	99105.7	127937	97790.7	99186.8	164108	102142	146757
Leu-Pro	7.60713	228.147	265330	183957	240934	205267	184909	164152	163218	189061
L-Formylkynurenine	9.59207	236.08	5.76477e+06	6.99113e+06	8488771	8375664	9043582	6.97348e+06	8.19949e+06	8547406
L-Fucose 1-phosphate	13.5225	244.035	286160	395683	542452	484144	464326	438328	376918	428357
L-gamma-glutamyl-L-leucine	11.1705	260.137	241065	215826	285942	237657	282103	259329	236755	231585
L-Glutamate	14.8459	147.053	43648992	44609832	49975920	46497628	55641368	45261124	55259364	48708196
L-Glutamate 5-semialdehyde	8.92997	131.058	3.99349e+06	4.18734e+06	6.39514e+06	5.58546e+06	6.25463e+06	5336640	5902367	5959749
L-Glutamine	14.9875	146.069	187855232	140121760	155749696	142501120	150498752	206314544	168333296	111329936
L-Histidine	14.3904	155.07	27344600	24383858	28261996	19367032	20424430	25528590	13297226	12661485
L-Histidinol phosphate	14.2547	221.057	5.34572e+06	4769545	4874527	4.0614e+06	4340558	5348164	4.30252e+06	3.56435e+06
L-Hypoglycin	12.7391	141.079	82321.7	80543.2	174403	73535.7	140708	84003.4	48756.4	46268.5
Linoleamide	3.95185	279.256	3.08843e+06	2569437	2.6453e+06	3.03476e+06	2.85019e+06	2.51707e+06	3.18558e+06	2.87852e+06
L-Isoleucine	10.8643	131.095	100836720	73307656	95151080	89669936	90525952	127450696	98463552	83181632
L-isoleucyl-L-proline	9.32372	228.147	614782	700005	844021	707982	867706	890059	782146	787744
L-Kynurenine	10.4206	208.085	8353070	7338629	9515555	8435120	9271332	12234758	8895241	8832655
L-Lathyrine	11.0495	182.081	133008	131168	152847	112595	169530	135992	198320	149042
L-Leucine	10.336	131.095	141379856	114115056	150413568	125884272	136735248	165605232	121866832	103050072
L-Lysine	22.4268	146.105	12770612	10093381	14055709	10050304	12180850	15957316	10684978	6.22618e+06
L-Methionine	11.2599	149.051	75954104	63461412	81535400	61914292	76806768	91070376	63678788	56906488
L-Methionine S-oxide	13.538	165.046	5.87265e+06	5.01315e+06	5820300	5.57686e+06	6.41239e+06	7.93928e+06	6412722	6.33526e+06
L-Normetanephrine	8.46271	183.09	583901	441010	723619	704882	627145	581739	614181	659822
L-Ornithine	21.8133	132.09	2.99153e+06	2.39247e+06	2.83026e+06	2.01246e+06	2.36736e+06	3.57084e+06	1.99143e+06	1.32284e+06
L-Phenylalanine	9.78378	165.079	67518728	56983304	79888560	60675660	72773488	84868112	65802672	55415372
L-Proline	12.3738	115.063	419376416	379234784	488459136	436720256	405703168	429227392	372534848	353481184
L-Pyrrolysine	7.2513	255.158	165348	230428	202545	156611	222770	179351	166277	187605
L-Serine	15.6928	105.043	1557660	1.32266e+06	1.54258e+06	1.50841e+06	1.76066e+06	1.82239e+06	1.79197e+06	1.48437e+06
L-Threonine	14.5984	119.058	3.73476e+06	2747607	3173473	1767115	2.34424e+06	2.81625e+06	1924639	1.75134e+06
L-Tryptophan	11.3713	204.09	8259285	6.853e+06	9201677	7.94946e+06	9197771	10029233	7.88354e+06	7267881
L-Tyrosine	12.852	181.074	44681736	37395356	48124868	33396450	43446760	48661844	30022692	33851192
Luteolin 7-O-[beta-D-glucuronosyl-(1->2)-beta-D-glucuronide]-4'-O-beta-D- glucuronide	12.0046	814.143	657029	685477	816911	776151	650273	615514	871519	515507
L-Valine	12.0941	117.079	27530712	23010980	29091228	21496576	28637200	33107326	23924224	19447610
Lys-Ala-Pro	22.3914	314.195	93886.5	103350	173218	94030.5	119845	190799	107197	47941.7
Lys-Asn	14.6275	260.148	503708	443608	524334	458884	671374	500591	446973	554135
LysoPC(16:0)	4.27097	495.332	4.24666e+06	3.2349e+06	3.52844e+06	6.83786e+06	4530927	5644642	4.97873e+06	5.99675e+06
LysoPC(16:1(9Z))	4.27254	493.317	2.94324e+06	3.01379e+06	3.46914e+06	3.68903e+06	2.96282e+06	2811534	2.77211e+06	3035921
LysoPC(18:1(11Z))	7.31398	521.349	183803	213486	233340	443208	235229	222110	245659	224034
LysoPC(18:1)	4.18191	521.348	4.23005e+06	3.25123e+06	3.54739e+06	7.01477e+06	3.9855e+06	4.45971e+06	4716188	4410560
LysoPE(0:0/20:4(5Z,8Z,11Z,14Z))	7.28158	501.285	72634.1	127684	243462	72109	90518.1	30425	87710.7	39770.2
LysoPE(16:1)	4.30588	451.27	635035	607858	1.11882e+06	704977	552145	366580	411795	381668
LysoPE(18:1)	4.18443	479.301	949463	984559	1.35057e+06	1.21076e+06	814992	473221	741601	654570
LysoPE(20:4)	4.14241	501.285	799142	1.14812e+06	1.58899e+06	723461	898643	346269	315579	294235
Lys-Val	21.3442	245.174	3592501	4400454	5736955	4.18316e+06	6022877	5712800	4906010	5404935
Maleamate	15.2278	115.027	804026	622465	849115	1.00128e+06	913923	1.18165e+06	1.14067e+06	709392
Maleic acid	12.176	116.011	246427	291822	233601	214011	273244	196683	155671	172595
Maleimide	8.48205	97.0165	286823	279007	441487	443688	449328	420107	396786	388191
Melochinone	4.56261	331.157	1.26695e+06	1.01503e+06	863414	1.05771e+06	969323	903902	644856	812099
meso-2,6-Diaminoheptanedioate	22.3704	190.095	103548	62140.8	98084.1	74705.9	94586.1	109698	73409.4	39454.2
Methacholine	12.6552	159.126	764060	773572	1.27207e+06	927528	1.1206e+06	1.03333e+06	949094	997352
methyl 8-[3,5-epidioxy-2-(3-hydroperoxy-1-pentenyl)-cyclopentyl]-octanoate	3.89094	396.251	2.69354e+06	3.64744e+06	4.18663e+06	1.91574e+06	2.7102e+06	1.40246e+06	1.60537e+06	1.4486e+06
Methyl acetyl ricinoleate	3.69815	354.277	14271310	14176251	12875998	16854766	16234795	21162386	19037088	19254668
Methyl butyrate	4.57089	102.068	647271	841248	988628	879508	958476	893734	883034	930259
Methyl cinnamate	4.01946	162.068	988745	1.0324e+06	911753	777412	788804	554643	784783	634247
Methyl oxalate	3.78723	118.027	406644	712767	727208	379330	314942	287961	355055	274429
Methyl5-(but-3-en-1-yl)amino-1,3,4-oxadiazole-2-carboxylate	10.1214	197.08	1.1126e+06	1.12239e+06	1512946	1.28078e+06	1.92265e+06	1688255	1.53186e+06	1.72528e+06
Methylenediurea	11.3414	132.065	438208	299282	245155	262972	251743	295731	220503	238758
Methylimidazole acetaldehyde	7.46892	124.064	1178219	364316	861189	821511	1.22167e+06	742558	1.00512e+06	1.30589e+06
Methylimidazoleacetic acid	9.38924	140.059	295745	268617	374258	289855	309762	410000	329648	290325
Met-Met-Met	14.1217	411.131	1.00511e+06	1.36288e+06	1.71506e+06	1.91305e+06	1460639	1.12548e+06	1.72633e+06	1711702
Met-Pro-Ser	14.8085	333.136	872639	781617	671384	678405	855046	964697	804961	513998
Met-Thr-Asp	13.1947	365.126	246295	230763	305051	294442	328261	308951	403739	342942
Met-Thr-Pro	10.688	347.152	300774	299469	563885	480532	495049	499306	437025	494733
Met-Trp-Trp-Trp	8.77961	707.289	126981	138342	137498	131980	105685	136508	156146	174692
Met-Val-His	12.8835	385.179	2.35429e+06	876623	2.67401e+06	3.89351e+06	3510773	5340450	1.3775e+06	1090006
MG(0:0/16:0/0:0)	3.86123	330.277	1.04299e+06	962183	798734	1.42482e+06	1.14579e+06	1848032	1.6399e+06	1.54407e+06
Millettone	4.49926	378.11	1.04934e+06	1.03949e+06	718874	874551	769112	674884	333116	686945
Miroestrol	10.7203	358.141	77109.5	75942.9	95505.4	96133	106577	100479	121659	113533
ML-236C	3.8471	290.188	1.04604e+06	1.0973e+06	1.02719e+06	1.39466e+06	1.1373e+06	894089	1.02887e+06	1.0021e+06
Monomethyl sulfate	14.144	111.983	2.99249e+06	2.10868e+06	1.78147e+06	3226873	2.85198e+06	2.7505e+06	3.02878e+06	2.78918e+06
Montanin A	3.84408	312.136	940943	760020	1.00347e+06	832283	756656	511692	622967	511952
MOPS	7.50223	209.072	1.1026e+06	382211	6.70743e+06	267274	102072	0	0	113695
Mukaadial	3.98215	266.152	516136	657676	536098	438416	343872	394927	454224	510933
Myristoylglycine	3.8461	285.23	1.10028e+06	1.14673e+06	1.20919e+06	1.00922e+06	801216	582098	608783	513832
N-((R)-Pantothenoyl)-L-cysteine	13.3069	322.12	296728	424501	606621	376114	491660	464246	397624	331160
N-(1,3-dihydroxypropan-2-yl)-9S,11R,15S-trihydroxy-5Z,13E-prostadienoyl amine	7.56814	427.293	199524	514047	180604	175729	132986	86397.7	90129.4	63758.4
N-(3-oxooctanoyl)-L-homoserine	4.11965	259.142	8207171	8438105	8.06773e+06	11077362	9210457	8.34376e+06	10969726	8884824
N-(6-Aminohexanoyl)-6-aminohexanoate	4.4723	244.178	229289	198991	99834.2	154546	107525	191629	154059	152975
N(alpha)-t-Butoxycarbonyl-L-leucine	4.58512	231.147	232780	307071	173155	219662	356605	285545	219668	224972
N(pi)-Methyl-L-histidine	12.0629	169.085	2211599	2.44191e+06	3.94982e+06	3293527	2.42859e+06	3719879	2899402	2.41172e+06
N,N-dihydroxyisoleucine	8.2691	163.084	731516	487577	518534	470075	429571	424811	379716	431174
N,N-dihydroxyvaline	9.75565	149.069	530024	136893	134274	118647	52610.3	99304.3	106402	329993
N,N-Dimethylglycine	13.242	103.063	578196	617563	680040	736295	660480	799289	811110	667518
N1,N8-diacetylspermidine	14.6605	229.179	1.28683e+06	1.14968e+06	1.42623e+06	1.52105e+06	1.54067e+06	1820116	1.27773e+06	1.50036e+06
N1-Methyl-2-pyridone-5-carboxamide	7.85301	152.059	87395	126900	159011	107054	115547	97226.8	42383.7	88076.5
N2-(D-1-Carboxyethyl)-L-arginine	13.5471	246.133	1.84654e+06	1.46772e+06	2.1894e+06	1.34555e+06	1.65612e+06	1.41496e+06	1148511	1286657
N2-Acetyl-L-aminoadipate	11.445	203.08	855507	754557	1.15708e+06	958804	1.07942e+06	1.1608e+06	1.02114e+06	1315875
N2-N2-Dimethylguanosine	8.16813	311.123	542966	478337	663238	454353	679162	716683	475292	480190
N3-(4-methoxyfumaroyl)-L-2,3-diaminopropanoate	8.48715	216.075	123396	111701	116362	157204	107648	155422	71959.7	125800
N3-hydroxyethylcytosine	19.8793	155.07	600382	370644	384373	361230	477052	499259	342680	300782
N4-(Acetyl-beta-D-glucosaminyl)asparagine	15.5613	335.133	555508	720952	672998	582168	612693	596124	508739	587118
N4-Acetylaminobutanal	6.22038	129.079	333233	293863	432357	388701	361895	332878	385248	357733
N4-Acetylcytidine	7.91448	285.096	285341	265618	389106	277684	321372	377523	316931	343147
N5-(L-1-Carboxyethyl)-L-ornithine	17.5401	204.111	81796.2	108414	113894	143715	109163	130316	104282	120809
N5-acetyl-N5-hydroxy-L-ornithine	11.9736	190.095	227765	238578	363306	137188	183809	233552	172773	183517
N5-formyl-N5-hydroxy-L-ornithine	13.4352	176.08	74883.4	95540.4	81977.7	67422.5	72981.3	104351	116138	72557.7
N6,N6,N6-Trimethyl-L-lysine	21.14	188.153	1.92564e+06	1.83527e+06	2.47893e+06	2.06714e+06	2.15819e+06	2.23531e+06	1.88167e+06	1943284
N6-Acetyl-L-lysine	8.20047	188.116	648016	701546	840728	646738	623856	740838	766443	626442
N6-Acetyl-N6-hydroxy-L-lysine	9.77664	204.111	248648	187694	344339	183081	224119	243990	171018	176771
N6-Methyl-L-lysine	21.9703	160.121	940467	988103	1.37805e+06	1.44656e+06	1.67835e+06	2130022	1.82568e+06	1.62905e+06
N-acetyl -D- glucosaminitol	12.69	223.105	160176	158311	212108	227922	206929	236793	198353	249101
N-Acetyl-aspartyl-glutamate	17.0647	304.091	16093273	14301469	22531340	21796734	19817450	18528460	22355648	20561274
N-Acetyl-D-fucosamine	11.7224	205.095	6.98276e+06	7329519	11026353	9059778	10710512	9916733	8904718	10130059
N-Acetyl-D-glucosaminate	15.8073	237.085	180465	158180	250380	231260	286621	200866	146869	204366
N-Acetyl-D-glucosamine	11.3856	221.09	571877	491732	866149	704415	858895	805942	713594	930256
N-Acetyl-D-glucosamine 6-phosphate	14.7908	301.056	631161	556218	624507	651343	473933	615696	698801	588919
N-Acetyl-D-mannosaminolactone	13.9991	219.074	4.05336e+06	4416147	6650887	5.87701e+06	6137843	5510642	6212680	5.89499e+06
N-Acetylglutamine	10.4346	188.08	637218	674705	962949	913842	937025	928444	953509	1.02507e+06
N-Acetylindoxyl	9.61926	175.063	540352	611648	664876	696709	736301	597366	692202	703665
N-Acetyllactosamine	13.1749	383.143	313826	386695	587774	465646	428296	521480	458561	557918
N-Acetyl-L-aspartate	14.8626	175.048	563009216	590771200	742805056	691152704	728870848	706111872	726114688	674635072
N-Acetyl-L-citrulline	13.0431	217.106	327576928	230451760	274937664	241062448	251857328	241797440	178356208	139287056
N-Acetyl-L-glutamate	14.2636	189.064	29995984	33233012	60262292	52698980	47051216	39231292	49770748	47090880
N-Acetyl-L-glutamate 5-semialdehyde	9.16272	173.069	271412	231976	430143	439123	377900	278758	396328	346452
N-Acetyl-L-histidine	8.61135	197.08	3.56783e+06	2.61963e+06	3.88235e+06	2.54382e+06	2764915	4.25914e+06	2.33452e+06	1.46037e+06
N-Acetyl-L-leucine	7.93223	173.105	731259	965552	839000	615731	745042	683546	559071	661281
N-Acetylmethionine	7.45441	191.062	13761554	15210101	24869474	17857436	18752990	15844453	15175897	16224512
N-Acetylneuraminate	13.6668	309.106	981318	1.04721e+06	980597	707676	706965	591178	524374	527973
N-Acetylornithine	13.0619	174.1	139528	120360	169243	84224.3	125322	142680	103264	88039.5
N-Acetylvanilalanine	8.02206	253.095	231283	191129	320856	231551	233840	320821	172630	222730
NAD+	13.7332	663.109	33577612	35921220	39131984	37557220	40369164	41567736	43022160	39093164
NADH	13.2601	665.124	6.14528e+06	5.18642e+06	7999102	9309183	11308226	10481164	8.34653e+06	10504417
NADP+	16.5832	743.076	1.02068e+06	3.43436e+06	4.01091e+06	1.25057e+06	1.66652e+06	1555080	1.04158e+06	1759710
NADPH	17.3602	745.091	1.58207e+06	80071.1	238919	2.37003e+06	2.77836e+06	2.50486e+06	3.67595e+06	2.27262e+06
Nalpha,Nalpha-Dimethyl-L-histidine	8.18443	183.101	282930	428429	491480	482096	471264	383361	481018	484296
Nalpha-Methylhistidine	7.48145	169.085	3.31067e+06	4.31715e+06	6.61742e+06	4.16955e+06	3.68273e+06	2.79537e+06	3402781	3234789
N-Carbamoyl-L-aspartate	17.0568	176.043	374111	478800	1.20661e+06	1.69385e+06	1408219	846291	1.82487e+06	1.33545e+06
N-Carbamyl-L-glutamate	16.9079	190.059	578595	681625	946780	755707	771840	628190	720990	732761
N-Carboxyethyl-g-aminobutyricacid	13.4395	175.085	780775	1005349	1.0911e+06	950607	1.21841e+06	1.20519e+06	978806	1.13885e+06
N-Decanoylglycine	7.31918	229.168	491942	489938	666314	496988	489776	469758	449422	542122
N-Decanoylglycine	4.44214	229.168	4.17204e+06	4.90991e+06	5.17286e+06	4165587	4.08901e+06	3.91992e+06	3124397	4.35122e+06
Ne,Ne dimethyllysine	21.0015	174.137	329202	325421	399894	317802	381006	432944	305592	260336
Neuraminic acid	16.6458	267.095	572642	662415	782085	690408	777682	703507	699559	759433
N-Formimino-L-glutamate	11.6646	174.064	529494	537109	814186	701135	741088	589324	595635	669712
NG,NG-Dimethyl-L-arginine	21.0422	202.143	2.55225e+06	1.84164e+06	2.59599e+06	1.96251e+06	2.26171e+06	2.96153e+06	1.71058e+06	1.52881e+06
N-Glycolyl-D-glucosamine	18.6502	237.085	84595	118706	133777	143806	152607	127592	97040.9	122626
N-Heptanoylglycine	4.59971	187.121	1.76103e+06	1.80923e+06	1.70123e+06	1788340	1.67235e+06	1.63042e+06	1.37076e+06	1761397
N-hydroxyisoleucine	11.8223	147.09	605260	535505	732999	501420	718771	711193	440525	389645
N-hydroxyisoleucine	8.41897	147.089	252680	297255	367016	328629	365304	315804	354460	308029
Nicotinate	7.7327	123.032	285738	290229	275843	295241	136126	199359	150374	160959
Nicotine	5.25343	162.116	154512	172064	160379	153554	154111	163781	173809	156127
Nigakihemiacetal A	3.79037	410.23	4265606	4.1258e+06	3706960	3.96205e+06	3.47513e+06	1.44262e+06	2.28257e+06	331860
N-Methyl-2-pyrrolidinone	4.74262	99.0684	191987	234929	208705	227213	218057	198848	192019	236186
N-Methylethanolamine phosphate	14.6945	155.035	1.06483e+06	780801	1.76248e+06	1480703	1.64495e+06	1.73208e+06	1.20724e+06	1.65741e+06
NMNH	16.0291	336.073	124887	118551	181564	136464	162876	82722.5	112456	152750
N-Nonanoylglycine	4.53817	215.152	3.74486e+06	4.5579e+06	5031922	3.70744e+06	3.6569e+06	3.59479e+06	2875000	3.72823e+06
nocardicin F	11.3971	399.107	102470	96422.5	84366	114451	104828	137273	123017	150636
nonulose 9-phosphate	16.9665	350.061	350078	351240	325344	197524	383231	196697	281094	241317
Norepinephrinesulfate	7.52903	249.031	102444	159853	240855	146688	210591	217764	232999	208095
N-Undecanoylglycine	4.25072	243.183	3.14703e+06	2.54972e+06	2.91214e+06	2.5022e+06	3033014	2363885	1.58733e+06	2658081
N-α-acetyl lysine methyl ester	11.8547	202.132	206848	227563	364837	318059	308921	301664	305091	257662
O-Acetylcarnitine	10.2551	203.116	9851525	8272924	14431344	9341877	11477451	8572466	10469682	9560108
O-Acetyl-L-homoserine	10.6742	161.069	422916736	520177056	629971264	395440544	489589632	308656000	271623008	285026048
O-Acetyl-L-homoserine	9.47228	161.069	4.01914e+06	4616796	6631697	5755347	6314097	5816475	6003673	6390818
O-Acetyl-L-serine	10.6944	147.053	21222032	20522654	33274016	28027126	28750144	27083548	24946094	25294304
O-Butanoylcarnitine	8.07714	231.147	2.32129e+06	2167182	4.05374e+06	3794072	3.32054e+06	2.57119e+06	3102294	3.11298e+06
Octadecanamide	3.88537	283.288	1.20762e+06	1.01505e+06	681019	863742	731314	1.32017e+06	1.03539e+06	950912
Octadecanoic acid	3.60507	284.271	409685664	304945024	234305728	470074720	385055584	362926880	357044032	324913760
octulose 8-phosphate	16.6523	320.051	348846	353534	369484	267387	390850	232800	306076	266046
Octylamine	9.02073	129.152	994551	1.07735e+06	1.0795e+06	1.06649e+06	1.04229e+06	1114743	1.06844e+06	1.02627e+06
Oligomycin B	7.48998	804.503	744328	304607	374222	260385	384045	347467	310063	993985
o-Methoxyphenol	4.70734	124.052	110798	110482	124765	103217	88558.7	146674	75677.2	113388
Ophthalmicacid	13.4034	289.128	394531	469163	541981	892748	788819	849314	1.12001e+06	1.44047e+06
O-Propanoylcarnitine	9.04868	217.131	7.28079e+06	7272976	10369714	8907521	10124095	9999379	8027155	9269020
Orotate	10.4703	156.017	84619.6	71837.1	122748	135206	155606	85963.5	138618	134751
Orotate(Fragment)	9.65883	112.027	248023	238859	345222	185354	382479	360528	300891	231461
Orotidine	12.817	288.059	2.92122e+06	3.06778e+06	4.56234e+06	3.6361e+06	4164675	3607184	3411488	3.64058e+06
Orthophosphate	15.9199	97.9769	2864500	3051399	1.86053e+06	1663198	2153460	1.80729e+06	1.70987e+06	1.84563e+06
Orthophosphate	14.5832	97.977	11528533	12813942	14592833	15367586	14931812	15372464	16884892	16145566
Oxalate	18.269	89.9954	332256	179589	276385	266313	323277	303767	279780	266560
Oxidized Latia luciferin	3.75098	194.167	1.75687e+06	2.05809e+06	2225374	1.96481e+06	1.83727e+06	1.51234e+06	1.66746e+06	1.59448e+06
Oxoamide	7.58572	192.09	2.67559e+06	2.52604e+06	3.38282e+06	3.11343e+06	3038465	3.79937e+06	3.01984e+06	2.68364e+06
PA(P-42:2)	3.74883	768.604	948604	3.08645e+06	4.73643e+06	1.03027e+06	1.70609e+06	237821	739011	216835
Palmiticamide	3.9428	255.256	843184	573761	571921	648461	665010	782366	564434	684233
Pantothenate	8.34699	219.111	76164824	80333112	114051784	108031328	115241768	103494232	105888280	108405352
PC(32:1)	3.7161	731.545	6.92316e+06	8736061	14244326	4.49188e+06	5.86202e+06	1.45068e+06	2996870	1.40844e+06
PC(34:2)	3.70847	757.561	7991891	9986995	16110960	4.11383e+06	5.74929e+06	1.04189e+06	2.25202e+06	1.15434e+06
PC(36:2)	3.68209	785.593	7.58962e+06	9813825	12632572	2.57078e+06	5.07939e+06	656010	1.36747e+06	757829
PC(P-34:0)	3.71357	745.599	3.29544e+06	3.98178e+06	5.41585e+06	1.60428e+06	2.18466e+06	526398	693966	596530
p-Chlorobenzhydrol	4.49578	218.05	148070	162126	171951	181148	199374	160867	131286	204672
P-DPD	13.3792	212.009	279464	281557	385228	417447	287583	278697	339759	332269
PE(P-36:4)	3.64617	723.521	924088	1.31395e+06	1.27948e+06	920983	1.27204e+06	0	270558	0
PG(32:1)	3.45936	720.493	719269	868628	866331	670172	571710	946296	629207	613560
PG(36:2)	3.31754	774.541	166239	294137	350815	93328.5	131279	32775.9	50875.9	22662.2
Phe-Asn	7.68786	279.122	179309	329848	188232	173295	140576	193334	247810	128774
Phenol sulfate	5.02844	173.999	341890	343173	476446	468210	480736	469452	506227	423785
Phenolsulfonphthalein	7.43405	354.056	82106504	62964240	92198472	65031780	68217264	97139144	54852112	36438908
Phenylgalactoside	7.92691	256.095	579899	312697	506111	702199	475638	1.08743e+06	776952	667811
Phenylpropanoate	4.52987	150.068	413634	455705	440596	437567	431845	405331	343085	400544
Phosphocreatine	15.0941	211.036	6.13438e+06	7.46334e+06	8670306	11484806	16213282	11905767	13687222	14699714
Phosphodimethylethanolamine	13.9255	169.05	19309978	23223726	26493238	21888712	26276342	17155038	14414226	20506252
Phosphodimethylethanolamine	14.5571	169.05	69869584	78997208	99560808	92052816	96553560	85151208	90865728	95985008
Phosphoenolpyruvate	17.9645	167.982	1.12025e+06	1.71469e+06	1.72022e+06	1.76987e+06	1.93367e+06	1.40073e+06	1.57942e+06	1.54018e+06
Phosphonoacetaldehyde	13.8759	123.993	5389938	5300738	6300634	5.18625e+06	6557119	7.0069e+06	6223112	6175987
Phosphonoacetaldehyde	14.5654	123.993	1.29322e+06	1.23473e+06	1.97541e+06	1.56146e+06	1.68999e+06	1.53406e+06	1.70786e+06	1.67178e+06
Phthalate	13.5151	166.027	1.95494e+06	1.92997e+06	1.89607e+06	1.95927e+06	1.86525e+06	1.99963e+06	1.987e+06	1.83392e+06
Phytuberin	3.72583	294.183	78257144	87601912	88194768	77728048	79903920	64854520	64320836	68983448
PI(38:4)	3.41041	886.556	786377	854743	557382	342789	685477	185458	279939	206061
Picolinamide	7.47819	122.048	123878544	124924368	161286176	137002704	145933488	154121344	143425136	147088288
Piperidine	14.4945	85.0892	2.42793e+06	2.58121e+06	2.54861e+06	2.6017e+06	2.78089e+06	2454246	2744826	2378504
PIPES	14.7782	302.061	4901950	4.68851e+06	4264583	4.19103e+06	3.89193e+06	4.49682e+06	4.46629e+06	4233483
Pleuromutilin	3.63417	378.24	1.73618e+06	1.47102e+06	1.67736e+06	1.51043e+06	1.58277e+06	1.21623e+06	1.10012e+06	1.21417e+06
p-Menthane-3,8-diol	7.34532	172.146	195364	184287	191386	198007	249045	205053	204681	195734
Precocene 2	3.83905	220.11	21493784	22610564	22274052	20530108	18720996	11535283	14683064	12070105
Proclavaminic acid	13.3995	202.095	492181	466882	652174	616846	625575	547680	521524	553883
Propanoyl phosphate	13.8213	154.003	122372	199821	181255	158773	183374	217413	163421	193762
propiin	14.82	179.061	20716264	21817670	25299570	23184838	24782682	27897716	23742184	24867054
Prostaglandin G2	3.88184	368.219	2.41853e+06	2.79598e+06	2.69599e+06	2.28113e+06	2.56142e+06	1.47679e+06	1.67254e+06	1.7601e+06
PS(34:1)	3.4245	761.52	1.61769e+06	1.5512e+06	1.34163e+06	1.23371e+06	1.34846e+06	551965	765831	452095
PS(36:2)	3.41806	787.535	1.02591e+06	1488945	953473	681616	846230	310164	368716	275376
Pseudouridine	11.7272	244.069	3.83465e+06	3868168	4.47998e+06	3.50206e+06	4142531	5.17277e+06	3.95125e+06	4.45769e+06
Psicofuranin	9.1222	297.107	631311	586671	660962	509454	719928	894622	604396	540242
psicoselysine	20.783	308.158	100413	74186.2	114315	88683.4	127788	152677	47501.9	49486.4
Psoralidin	7.45947	336.099	1.67965e+06	1.97617e+06	1284806	1.59661e+06	1.11573e+06	896061	538550	879170
Pyridine-2,3-dicarboxylate	15.5742	167.022	3.99415e+06	4864218	5671901	4.22265e+06	5.38982e+06	6.09863e+06	5126860	5.79711e+06
Pyridoxal	7.87922	167.058	2400300	2.148e+06	1.78232e+06	2.01799e+06	1.90368e+06	2.62726e+06	2.10014e+06	2.62278e+06
Pyridoxine	7.76489	169.074	36997208	27257744	38650752	31224586	33789588	41724068	31023844	21605740
Pyrimidine nucleoside	7.46018	214.095	900584	1.06306e+06	700757	886690	677888	575293	289269	466471
Pyruvate	8.49362	88.016	121522	113067	131857	197488	121755	200921	437178	204428
Quinate	13.3588	192.063	130081	372197	122396	95408.7	137464	96937.9	87496.2	72212.2
Rapanone	3.75349	322.214	1.09423e+06	1.22373e+06	1.03133e+06	1.10797e+06	810693	709876	675964	591727
Retinyl ester	3.8043	302.225	1.2454e+06	773845	1054527	696045	791986	263606	387554	370179
Riboflavin	8.03604	376.138	973898	484386	762438	1.04745e+06	878534	1.79467e+06	1.29352e+06	952216
Riboflavin cyclic-4',5'-phosphate	11.2294	438.094	241253	241716	337539	276368	321737	324554	284540	298125
Ribothymidine	7.46076	258.085	291654	326146	429325	300003	355302	564414	406577	384210
Rishitin	3.79225	222.162	3.60917e+06	3.38256e+06	3.36143e+06	2.93898e+06	1.90691e+06	2.0549e+06	1.74858e+06	1.52869e+06
S-(2-Hydroxyethyl)-N-acetyl-L-cysteine	7.5717	207.057	1.14849e+06	2649436	3.4407e+06	6.59153e+06	3.83325e+06	6868650	756032	5330352
S-(3-oxo-3-carboxy-n-propyl)cysteine	13.9299	221.036	480979	1.03716e+06	1.87625e+06	811662	975083	554861	657807	711132
S-(Formylmethyl)glutathione	12.1525	349.094	396751	395207	506621	997273	639465	978400	711312	1.67106e+06
S-[(E)-Prop-1-enyl]-L-cysteine S-oxide	8.77703	177.046	264251	380766	502116	277732	357993	395154	346905	313315
S-Adenosyl-L-homocysteine	13.0466	384.122	608344	929305	1.23584e+06	823857	1.13686e+06	859476	411967	1.1004e+06
Salicylaldehyde	5.05823	122.037	878638	858955	1.07401e+06	718372	784725	737316	718482	1.15206e+06
Shiromodiol diacetate	3.6564	338.21	2815496	2.53442e+06	2421922	2.3505e+06	2798959	1.68685e+06	1.55205e+06	1.63076e+06
Sinapyl alcohol	4.26035	210.089	359733	487791	509832	315092	302105	318782	325487	321235
Slaframine	9.18261	240.147	1.34855e+06	1.48895e+06	2195525	1.56491e+06	2018695	2.01556e+06	1.85476e+06	1.88862e+06
SM(d18:1/24:1(15Z))	3.80803	812.678	3.17186e+06	2.52616e+06	2.77475e+06	1.54809e+06	2570716	750825	859542	534249
SM(d32:1)	3.96528	674.536	1.42832e+06	1.41803e+06	1.80949e+06	3.24526e+06	1.82782e+06	3412409	3.77421e+06	2.98422e+06
SM(d34:1)	3.93439	702.568	10482028	10770168	12229273	14841470	11225535	14928709	18446564	14949087
S-Methyl-5-thio-D-ribose 1-phosphate	12.1241	260.012	103379	123186	135139	150404	141905	65578.6	86511.9	87260.6
sn-glycero-3-Phospho-1-inositol	16.035	334.066	4713567	4910361	6672706	5652850	4981115	4425117	4.56841e+06	5.07206e+06
sn-glycero-3-Phosphocholine	13.8421	257.103	919773376	891560960	1069336960	899001088	1055202816	1159402240	995744768	1049770624
sn-glycero-3-Phosphoethanolamine	15.3485	215.056	8221621	8468222	10253577	8932670	10666572	12518077	11455257	11532471
sn-Glycerol 3-phosphate	14.9356	172.014	46271664	44514084	48697528	37592708	41759600	39632884	32794566	37160224
sn-glycerol-1-phosphate	13.923	172.014	7198905	7.66212e+06	9458528	7.21864e+06	9705857	11660828	9437430	10336785
sodium dodecyl sulfate	3.54961	266.155	226216976	195667568	237010176	230901616	200670784	187028224	174835744	222649664
Sojagol	4.69744	336.099	243693	260457	170347	236076	198473	163892	100377	135827
Spinosyn A	3.53782	731.462	1453332	1.3985e+06	1.25848e+06	1.50986e+06	1.30677e+06	1.1219e+06	1.13218e+06	1.20818e+06
S-Sulfo-L-cysteine	17.6373	200.977	1.10735e+06	485137	518406	278908	536201	250941	219280	62903.9
Stachydrine	10.1993	143.095	203851	203153	236740	172288	199745	196998	161020	155291
Suberic acid	7.37502	174.089	966062	1.05446e+06	900966	1.06865e+06	835955	864395	792795	873481
Succinate	15.3982	118.027	2.42947e+06	2660575	2.97338e+06	2.48074e+06	2.42204e+06	2.72639e+06	1.92052e+06	2317480
Sulfoacetate	18.66	139.978	331477	337292	300252	249705	239178	240719	177939	307449
Taurine	15.3253	125.015	38177452	44361048	46700428	42063136	47515636	42718796	40469116	47636364
Tauropine	9.27613	197.036	229708	252590	343611	276496	329473	352695	304729	363181
Tetracosanoic acid	3.46753	368.365	400229	261261	121909	453242	351183	280720	234195	234104
Tetradecanoic acid	3.69763	228.209	37525404	31987026	28273416	34183320	31386706	26342006	24674912	24463882
Tetraethylammonium	14.7972	129.152	1.96932e+06	1.44685e+06	1.35741e+06	1.49388e+06	1.43859e+06	1.42838e+06	1.26006e+06	1.14674e+06
Tetrahydropteridine	8.8644	136.075	60105.5	79577.6	132740	104942	85172.8	73211.8	86143.8	75913.1
Tetranor-PGE1	3.77615	298.178	1.38285e+06	1.60379e+06	1.61022e+06	1.49915e+06	1.43666e+06	1.12036e+06	1.18861e+06	1.02134e+06
Tetranor-PGF1alpha	3.83457	300.194	832719	846778	1.05401e+06	930029	839172	283883	364807	216564
Thiamin	15.1873	264.105	4.20527e+06	3.25189e+06	3885460	2.5928e+06	2.86599e+06	3.53161e+06	2.07115e+06	2.08549e+06
Thiamin diphosphate	14.11	424.037	1.16127e+06	1.19506e+06	1.41096e+06	1.32461e+06	1.32344e+06	1.5162e+06	1.2014e+06	1.55694e+06
Thr-Ala	13.9477	190.095	175794	152257	157950	220585	215037	227589	189655	189840
Thr-Thr-Tyr	9.9796	383.169	132267	112769	238559	164085	196920	187721	133528	134492
Thymyl acetate	4.23126	192.115	640212	611086	613312	642233	652300	590033	566592	542706
trans-Aconitate	15.5645	174.016	277741	389692	520526	422247	617867	475196	522443	599876
Traumatic acid	4.18376	228.136	400886	470721	518792	434706	394057	408547	351913	370865
Triacetate lactone	16.8664	126.032	176984	116868	127753	122553	148033	141904	154565	135333
Tributyl phosphate	3.83098	266.165	4.0555e+06	2.9433e+06	3.79167e+06	1.5973e+06	2656133	1.5893e+06	1.93766e+06	3.85988e+06
Trimetaphosphate	21.7717	239.899	1.07362e+06	1.32669e+06	1.26216e+06	1.26524e+06	1282226	1.35948e+06	1.31594e+06	1.26758e+06
Trimethylaminoacetone	27.8507	115.1	604326	553719	527084	625079	505889	544409	608176	498938
tropine	27.618	141.115	270506	156532	255629	223648	132362	155874	275500	244512
Tuliposide A	7.4644	278.1	1.9354e+06	1.78264e+06	2.08467e+06	1.67076e+06	1.58855e+06	1.3944e+06	1.41118e+06	1.88197e+06
ubiquinol-1	3.84106	252.136	1.46915e+06	1.54023e+06	1.75572e+06	2.0679e+06	1.62928e+06	1.51492e+06	1.94851e+06	1.47951e+06
UDP	16.5974	404.002	3655260	4.70004e+06	4.45639e+06	3108787	4629148	3366581	1.85801e+06	3.46499e+06
UDP-D-xylose	16.7042	536.045	284048	452938	503829	364876	455402	449266	324097	340000
UDP-glucose	16.4741	566.055	7.19764e+06	8673673	10497046	8503108	12166783	11213663	12375923	10919783
UDP-glucuronate	19.5242	580.034	1.38896e+06	1.96319e+06	2208785	1.53707e+06	2.90421e+06	2238378	2.75283e+06	2.4823e+06
UDP-N-acetyl-D-galactosamine	15.075	607.081	5572771	5.53761e+06	6947527	6956602	8936381	9852771	9376819	8537776
UMP	15.0916	324.036	331903	356492	412786	297466	413843	319240	257177	391995
Undecanoylcholine	4.29023	271.251	24023638	596034	168796	109401	298923	217671	86935	85752.9
Uracil	8.00079	112.027	123037	126796	156596	120189	174909	186060	199297	183816
Urate	13.2477	168.028	1.31167e+06	1.05692e+06	1.04567e+06	663317	810124	1.01809e+06	681972	341891
Urethane	8.54259	89.0475	388152	486371	783119	702596	794445	811297	730504	849963
Urocanate	10.8681	138.043	2.42897e+06	367564	656213	361851	332988	658004	190232	308870
Ursodiol	7.35361	392.292	777259	634207	709804	693956	765109	988174	540271	666114
UTP	18.0321	483.968	8587003	10891043	8433194	4.13925e+06	9590675	6572047	5.86535e+06	7.33391e+06
Val-Val	12.7496	216.148	623451	738668	1.00035e+06	860676	975074	1000597	836705	893741
Vanilpyruvicacid	4.5837	210.053	678623	687525	618104	554323	609880	569259	449656	537638
Vincristine	4.95437	824.399	134423	122228	95311.2	148716	137295	189952	111767	116328
Vinylacetylglycine	9.4774	143.058	1.07186e+06	1.21397e+06	1706589	1.39618e+06	1.49518e+06	1.34225e+06	1.53287e+06	1.46601e+06
Vinylacetylglycine	7.57349	143.058	215022	211658	304265	338941	393098	219573	319515	240146
Xanthine	11.3381	152.033	1.96477e+06	1.55709e+06	2.09666e+06	1.91278e+06	2.05777e+06	2.36194e+06	2.05019e+06	1.81623e+06
Xanthommatin	15.0005	423.07	535598	460837	698125	603064	539543	557213	149799	299353
Xanthoxin	3.7973	250.157	31618406	32830836	28938554	30888080	29351034	28390794	25606204	29045932
Xylitol	12.7299	152.068	531207	408301	556369	449418	416900	459888	359467	317552
Zinnimidine	7.3206	261.137	58425.9	61103.9	73669.2	120933	96114.4	95571.1	98592.6	110544
Zoxazolamine	7.48754	168.009	213409	354687	295902	245451	0	0	0	0
α-(2,6-anhydro-3-deoxy-D-arabino-heptulopyranosid)onate 7-phosphate	16.2448	272.03	241439	315838	299733	204974	347642	231365	292807	234462
γ-glutamyl-S-t-propenylcysteine	11.3204	290.094	857590	872374	1174860	831323	1.06548e+06	577608	196418	306648
ε-aminocaproamide	7.48347	130.111	545398	644818	1.2303e+06	529469	492448	505975	567877	725914

## Sheet: EXP2_Target
Compound	CP_control_1	CP_control_2	CP_control_3	CP_control_4	CP_isoprenaline_1	CP_isoprenaline_2	CP_isoprenaline_3	CP_isoprenaline_4
(S)-Lactate-0C	3728245638	3013920709	4338677677	3260788935	3252849898	4015121638	2529880513	2379260421
(S)-Lactate-1C	260199804	214801455	313730103	218699515	234587146	304983637	180447403	171999538
(S)-Lactate-2C	189405100	149972298	220391915	151361583	165784578	229086620	130816504	124645443
(S)-Lactate-3C	3976374514	3162378102	4675502773	3473932125	3396816093	4188374787	2653636167	2507322288
TOTAL	8154225056	6541072564	9548302468	7104782158	7050037715	8737566682	5494780587	5183227690
Compound	CP_control_1	CP_control_2	CP_control_3	CP_control_4	CP_isoprenaline_1	CP_isoprenaline_2	CP_isoprenaline_3	CP_isoprenaline_4
(S)-Malate-0C	817907635	1141875087	1635263664	1646807134	1694977888	1454362061	1814362667	1712035690
(S)-Malate-1C	143275399	188318127	246581084	223609004	240814004	237943492	230657195	240741179
(S)-Malate-2C	224403245	295739010	385954508	353957840	385321379	386659377	368607829	402147892
(S)-Malate-3C	139457038	189504304	256571442	236112987	301285035	265815711	291554495	293873397
(S)-Malate-4C	29077851	38392487	48162491	39828786	52239442	52243260	47506618	53336604
TOTAL	1354121168	1853829015	2572533189	2500315751	2674637748	2397023901	2752688804	2702134762
Compound	CP_control_1	CP_control_2	CP_control_3	CP_control_4	CP_isoprenaline_1	CP_isoprenaline_2	CP_isoprenaline_3	CP_isoprenaline_4
3-Phospho-D-glycerate-0C	89782345	164951496	158965603	85249486	138522502	70859687	91777722	84036448
3-Phospho-D-glycerate-1C	11718776	17666185	16350664	6247984	11379583	6641867	5962740	7267001
3-Phospho-D-glycerate-2C	10021214	14722047	12833412	4197375	7006781	5337510	5487870	5646283
3-Phospho-D-glycerate-3C	82972878	150308338	146008288	78908151	121984969	65424655	84660045	77162407
TOTAL	194495213	347648066	334157967	174602996	278893835	148263719	187888377	174112139
Compound	CP_control_1	CP_control_2	CP_control_3	CP_control_4	CP_isoprenaline_1	CP_isoprenaline_2	CP_isoprenaline_3	CP_isoprenaline_4
6-Phospho-D-gluconate-0C	7083890	393805	437670	6613463	10859814	8868502	9412871	11232442
6-Phospho-D-gluconate-5C	2789131	67409	64400	1431775	2802379	2652239	1823853	2758247
6-Phospho-D-gluconate-6C	5480930	430704	613762	5479281	8765471	6904819	7378103	8461918
TOTAL	15353951	891918	1115832	13524519	22427664	18425560	18614827	22452607
Compound	CP_control_1	CP_control_2	CP_control_3	CP_control_4	CP_isoprenaline_1	CP_isoprenaline_2	CP_isoprenaline_3	CP_isoprenaline_4
Acetyl-CoA-0C	28054360	28171849	33908302	27892023	30708965	30537633	41397493	20866639
Acetyl-CoA-1C	8927682	8932486	11182932	9918628	8674931	10011732	14370446	6839866
Acetyl-CoA-2C	24853893	25925934	29377961	25704504	26739641	26992025	36614914	18805279
Acetyl-CoA-3C	12173628	12898857	15591383	13250488	13181733	13025527	20027074	9845386
Acetyl-CoA-4C	5199061	7955623	9090307	8655191	6412100	7046014	11385084	6174102
Acetyl-CoA-5C	10597337	11187578	14105548	12646437	10693846	9637919	17776071	8392884
Acetyl-CoA-6C	889891	1595390	2870988	3569300	1348479	1433708	4781189	1731074
Acetyl-CoA-7C	1090563	2554834	3959917	3275194	1365545	3285879	4631474	1997556
Acetyl-CoA-8C	107927	84178	263094	275473	41209	73380	650666	65489
TOTAL	91894342	99306729	120350432	105187238	99166449	102043817	151634411	74718275
Compound	CP_control_1	CP_control_2	CP_control_3	CP_control_4	CP_isoprenaline_1	CP_isoprenaline_2	CP_isoprenaline_3	CP_isoprenaline_4
Adenosine-0C	156478399	31523979	31646049	254631949	165973444	754206850	462177317	710957079
Adenosine-1C	25884386	5259033	6029535	38117391	27806669	124181257	72828921	119248710
Adenosine-2C	29449908	6760089	13732927	61222284	35781164	142171652	99444009	158951965
Adenosine-3C	33211029	8231735	13730059	64079247	35867225	148855868	102076447	160182429
Adenosine-4C	8751445	1471885	2752403	22137845	11809366	58086714	35252624	58934599
Adenosine-5C	33948951	7894261	14655590	64559703	36932203	142597389	101987392	160821142
Adenosine-6C	1569001	N/F	237049	4801821	1102939	11500799	7592814	13593266
TOTAL	289293119	61140982	82783612	509550240	315273010	1381600529	881359524	1382689190
Compound	CP_control_1	CP_control_2	CP_control_3	CP_control_4	CP_isoprenaline_1	CP_isoprenaline_2	CP_isoprenaline_3	CP_isoprenaline_4
ADP-0C	94321441	110490264	139528047	107434395	137038326	108507716	60366094	107458801
ADP-1C	6616622	5373336	13578680	15514400	3666601	6762935	6867126	14161529
ADP-2C	8810877	10265773	21088164	31169260	11980147	7485281	8111888	21827504
ADP-3C	13490090	20092953	30670739	30958249	21447828	13831467	11714854	22912743
ADP-4C	2463705	3983776	7241858	10084904	5258353	2234061	2407563	5970485
ADP-5C	12085227	14184628	26188400	29821593	19735316	15285628	11337354	22629064
ADP-6C	135912	319771	558933	817043	569598	N/F	N/F	174639
TOTAL	137923874	164710501	238854821	225799844	199696169	154107088	100804879	195134765
Compound	CP_control_1	CP_control_2	CP_control_3	CP_control_4	CP_isoprenaline_1	CP_isoprenaline_2	CP_isoprenaline_3	CP_isoprenaline_4
AMP-0C	41570233	6974515	12262847	44670688	45772057	41389754	50163941	54210450
AMP-1C	5247927	584304	1445506	7059563	5939227	6396285	7847776	9316891
AMP-2C	8194213	1021879	1971113	11146955	8068640	7184934	11887299	12768556
AMP-3C	7785162	1015932	2752857	11399608	7045136	6914497	11089043	12346677
AMP-4C	2977998	667214	663892	4186562	2262403	2619768	3561037	4281086
AMP-5C	7471155	757179	2204904	11249197	6947239	5926897	11606278	12211349
AMP-6C	244567	N/F	16880	518437	174407	236936	771233	392342
TOTAL	73491255	11021023	21317999	90231010	76209109	70669071	96926607	105527351
Compound	CP_control_1	CP_control_2	CP_control_3	CP_control_4	CP_isoprenaline_1	CP_isoprenaline_2	CP_isoprenaline_3	CP_isoprenaline_4
ATP-0C	641671848	761785607	752977048	496874999	676673847	617390605	523019497	600452303
ATP-1C	138151937	165562075	164648116	108988183	140805674	134072469	115358659	134987629
ATP-2C	168895492	206236666	215533958	151139363	179542651	153914751	150535968	170414654
ATP-3C	166826004	205540145	216328814	152051908	176490225	149182131	147154394	166494106
ATP-4C	60996638	73473732	88699812	62422928	57748724	60288454	62443594	69978983
ATP-5C	162857618	200286599	215803359	150784325	171509664	141831191	147554156	166227342
ATP-6C	5349987	4248108	13263198	12432413	6814592	6281336	13192168	11005245
ATP-7C	N/F	248996	42817	1002371	N/F	201999	1814795	2002229
TOTAL	1344749524	1617381928	1667297122	1135696490	1409585377	1263162936	1161073231	1321562491
Compound	CP_control_1	CP_control_2	CP_control_3	CP_control_4	CP_isoprenaline_1	CP_isoprenaline_2	CP_isoprenaline_3	CP_isoprenaline_4
cis-Aconitate-0C	41308667	54608821	66037325	70767674	95147014	83955244	94024077	93137874
cis-Aconitate-1C	6907126	10483723	12887556	12042480	15294674	14534306	14967844	16782503
cis-Aconitate-2C	31371906	41243418	51985284	47082963	72269159	61923468	67613149	67678903
cis-Aconitate-3C	10908629	14147681	17608117	15179559	23604022	21950753	21896493	22113711
cis-Aconitate-4C	5497231	8302350	12807482	10310579	15478357	14767347	14341635	15804406
cis-Aconitate-5C	3482299	3582638	6874426	5732780	5534426	8040999	8797762	8987632
cis-Aconitate-6C	108867	104905	231290	173097	279201	166008	538706	293127
TOTAL	99584725	132473536	168431480	161289132	227606853	205338125	222179666	224798156
Compound	CP_control_1	CP_control_2	CP_control_3	CP_control_4	CP_isoprenaline_1	CP_isoprenaline_2	CP_isoprenaline_3	CP_isoprenaline_4
Citrate-0C	807071515	1115131435	1205678855	1317854229	1657875476	1392234058	1639536612	1652790963
Citrate-1C	171273527	227343522	236378913	233879748	307193986	268059638	275000397	297403492
Citrate-2C	629111521	845495665	956132940	897280140	1192801250	1032744052	1190318516	1202720217
Citrate-3C	223133914	295215325	322835465	287738724	320961797	365147638	377233895	399025307
Citrate-4C	66961434	60260857	121522167	202528262	43329257	129028866	270743064	270256364
Citrate-5C	31762071	31774281	92745101	113073835	23060600	102432005	160965211	167051755
Citrate-6C	2211408	2060955	5091026	15115996	N/F	6476200	23175640	13952833
TOTAL	1931525390	2577282040	2940384467	3067470934	3545222366	3296122457	3936973335	4003200931
Compound	CP_control_1	CP_control_2	CP_control_3	CP_control_4	CP_isoprenaline_1	CP_isoprenaline_2	CP_isoprenaline_3	CP_isoprenaline_4
Cyclic AMP-0C	3134218	3877405	5442597	4307676	5736690	7288965	6605574	6961375
Cyclic AMP-1C	132160	327749	374236	656810	764641	680442	857022	868038
Cyclic AMP-2C	393864	303667	553315	834964	774197	815288	848194	1322925
Cyclic AMP-3C	378264	429164	896964	732418	1230003	983996	1519590	1494099
Cyclic AMP-4C	41366	72901	66225	133499	116377	224374	322518	242953
Cyclic AMP-5C	204327	352764	823421	836614	1131578	932959	1234269	1508016
TOTAL	4284199	5363650	8156758	7501981	9753486	10926024	11387167	12397406
Compound	CP_control_1	CP_control_2	CP_control_3	CP_control_4	CP_isoprenaline_1	CP_isoprenaline_2	CP_isoprenaline_3	CP_isoprenaline_4
dATP-0C	18647922	22989385	27944352	21653996	29219126	28688834	28476850	27800294
dATP-1C	1010853	1520287	966140	2112008	1480674	2225572	2953441	2827305
dATP-2C	283427	384348	1512788	1956374	184687	939699	2404299	1919725
dATP-3C	454882	601218	1649352	1392860	1423454	1100272	2257252	1836473
dATP-5C	633395	779645	1869821	1834790	1577691	873204	2371684	1909564
TOTAL	21030479	26274883	33942453	28950028	33885632	33827581	38463526	36293361
Compound	CP_control_1	CP_control_2	CP_control_3	CP_control_4	CP_isoprenaline_1	CP_isoprenaline_2	CP_isoprenaline_3	CP_isoprenaline_4
D-Glyceraldehyde 3-phosphate-0C	94972589	104581415	145099247	116486355	145555895	119756432	127816805	118372892
D-Glyceraldehyde 3-phosphate-1C	5337122	5834041	7966267	6467115	8394572	7553297	8641192	8064530
D-Glyceraldehyde 3-phosphate-2C	1204132	461736	2500394	1419577	2606972	2589243	3286749	2778849
D-Glyceraldehyde 3-phosphate-3C	77860677	78901068	118692160	95069945	117095451	94637661	103112891	99452860
TOTAL	179374520	189778260	274258068	219442992	273652890	224536633	242857637	228669131
Compound	CP_control_1	CP_control_2	CP_control_3	CP_control_4	CP_isoprenaline_1	CP_isoprenaline_2	CP_isoprenaline_3	CP_isoprenaline_4
D-Fructose 1,6-bisphosphate-0C	4496282	6091570	3667737	2848544	5048373	3206200	2703093	4550546
D-Fructose 1,6-bisphosphate-1C	646758	1002431	313297	130818	603119	413653	200441	387670
D-Fructose 1,6-bisphosphate-2C	572152	895851	224368	73584	346325	303345	148204	276263
D-Fructose 1,6-bisphosphate-3C	3646262	7210183	3843319	2841602	4229251	4297918	2638547	4096277
D-Fructose 1,6-bisphosphate-4C	588318	834762	332689	102960	361527	305835	137261	344488
D-Fructose 1,6-bisphosphate-5C	288430	399963	138120	31590	58638	111881	71613	85373
D-Fructose 1,6-bisphosphate-6C	2900550	3670191	1881543	2392922	2410332	1546954	2437007	3920805
TOTAL	13138752	20104951	10401073	8422020	13057565	10185786	8336166	13661422
Compound	CP_control_1	CP_control_2	CP_control_3	CP_control_4	CP_isoprenaline_1	CP_isoprenaline_2	CP_isoprenaline_3	CP_isoprenaline_4
D-Ribose 1,5-bisphosphate-0C	615249	378422	422527	163614	202651	21030	115038	98068
D-Ribose 1,5-bisphosphate-1C	38036	N/F	15191	15151	18818	18477	15521	15062
D-Ribose 1,5-bisphosphate-2C	201830	223695	262204	201156	99363	27571	98396	20392
D-Ribose 1,5-bisphosphate-3C	137528	157429	166030	127400	169592	57246	80344	81469
D-Ribose 1,5-bisphosphate-5C	250411	263826	224153	173485	39898	77452	57235	94143
TOTAL	1243054	1023372	1090105	680806	530322	201776	366534	309134
Compound	CP_control_1	CP_control_2	CP_control_3	CP_control_4	CP_isoprenaline_1	CP_isoprenaline_2	CP_isoprenaline_3	CP_isoprenaline_4
D-Ribose 5-phosphate-0C	25198275	50456491	34382535	17220344	18843407	13338447	15485291	16573137
D-Ribose 5-phosphate-1C	9297094	16665765	9910503	2999294	4093928	3175530	2911294	3022027
D-Ribose 5-phosphate-2C	16684464	24797765	17774935	14107267	10317959	10435874	12844704	14990185
D-Ribose 5-phosphate-3C	16131607	25989577	17628381	14623029	12534361	11957895	12718298	14884100
D-Ribose 5-phosphate-4C	1438362	5780327	6403370	1700799	493105	1660110	1695469	2166550
D-Ribose 5-phosphate-5C	19356062	43427169	26904963	12454298	8269647	9997326	11348487	13394498
TOTAL	88105864	167117094	113004687	63105031	54552407	50565182	57003543	65030497
Compound	CP_control_1	CP_control_2	CP_control_3	CP_control_4	CP_isoprenaline_1	CP_isoprenaline_2	CP_isoprenaline_3	CP_isoprenaline_4
D-Sedoheptulose 7-phosphate-0C	15173612	11795894	18680697	9620289	17482471	11402186	15659439	13589793
D-Sedoheptulose 7-phosphate-1C	8149576	4843313	7052416	1890719	6509391	3336455	5293369	3591520
D-Sedoheptulose 7-phosphate-2C	7643227	2823788	7200535	945707	4395814	2506925	3371620	1914222
D-Sedoheptulose 7-phosphate-3C	16029210	9322733	17196850	7999345	13094956	8532063	15911317	11102059
D-Sedoheptulose 7-phosphate-4C	14565311	10454506	14714308	7208818	15500027	9198019	14400546	9948738
D-Sedoheptulose 7-phosphate-5C	6003814	3084104	4920904	507475	4408185	1887772	3572929	1692344
D-Sedoheptulose 7-phosphate-6C	4271380	1892704	4365550	918828	2983443	981984	3538158	1419272
D-Sedoheptulose 7-phosphate-7C	4886790	3421030	7652213	2911899	5327839	2440983	7671263	5349240
TOTAL	76722920	47638072	81783473	32003080	69702126	40286387	69418641	48607188
Compound	CP_control_1	CP_control_2	CP_control_3	CP_control_4	CP_isoprenaline_1	CP_isoprenaline_2	CP_isoprenaline_3	CP_isoprenaline_4
GDP-0C	13089516	15546660	14156782	7403718	12897230	7467684	4072454	9993448
GDP-1C	1492128	1843568	1901431	721210	929043	625705	329175	1031935
GDP-2C	1976330	2385450	2376286	1216827	1905092	926107	500916	1325508
GDP-3C	1656485	2122394	1971973	1106528	1831600	727968	395858	1205453
GDP-4C	474064	644172	753317	313122	396182	141977	39747	316052
GDP-5C	1755964	2352427	2288989	1074269	1592846	677160	485224	954472
TOTAL	20444487	24894671	23448778	11835674	19551993	10566601	5823374	14826868
Compound	CP_control_1	CP_control_2	CP_control_3	CP_control_4	CP_isoprenaline_1	CP_isoprenaline_2	CP_isoprenaline_3	CP_isoprenaline_4
GTP-0C	10054462	15258551	11012654	2628790	10921877	3493057	2691099	7387456
GTP-1C	1728102	1751008	1463245	458667	1499273	423403	437258	904345
GTP-2C	1736865	1788868	1864053	456918	1348554	364689	289266	814647
GTP-3C	1641100	1760315	1742571	570457	1160545	473476	485021	987655
GTP-4C	351550	547633	418240	75124	272582	62575	85928	251686
GTP-5C	1546485	1593075	1461039	545029	1242088	292619	388954	917501
TOTAL	17058564	22699450	17961802	4734985	16444919	5109819	4377526	11263290
Compound	CP_control_1	CP_control_2	CP_control_3	CP_control_4	CP_isoprenaline_1	CP_isoprenaline_2	CP_isoprenaline_3	CP_isoprenaline_4
Guanosine-0C	60085	65026	93598	55752	211566	242609	148047	73254
Compound	CP_control_1	CP_control_2	CP_control_3	CP_control_4	CP_isoprenaline_1	CP_isoprenaline_2	CP_isoprenaline_3	CP_isoprenaline_4
Hypoxanthine-0C	91761900	121783584	165021976	73775591	110578649	15465325	38796784	34718378
Hypoxanthine-1C	6410963	8172987	10903595	5125650	6860807	508142	2079464	1668522
TOTAL	98172863	129956571	175925571	78901241	117439456	15973467	40876248	36386900
Compound	CP_control_1	CP_control_2	CP_control_3	CP_control_4	CP_isoprenaline_1	CP_isoprenaline_2	CP_isoprenaline_3	CP_isoprenaline_4
Inosine-0C	58597619	74607545	97219358	40833538	65350739	7763501	23310010	19041953
Inosine-1C	7605250	10569129	12796120	3861697	9462741	157105	2229624	1929784
Inosine-2C	9998021	12628370	19170212	8457872	13236030	770384	3636272	2916791
Inosine-3C	10056583	12685521	18818259	7290197	12532404	339742	3407352	2667364
Inosine-4C	2023077	2365196	5381051	1999990	2268332	39844	253158	343338
Inosine-5C	10055376	14172173	21757320	9621760	13458707	534171	4332254	4033528
TOTAL	98335926	127027934	175142320	72065054	116308953	9604747	37168670	30932758
Compound	CP_control_1	CP_control_2	CP_control_3	CP_control_4	CP_isoprenaline_1	CP_isoprenaline_2	CP_isoprenaline_3	CP_isoprenaline_4
Urate-0C	24564327	13018809	19515256	12642744	10894836	19032889	13319849	6537822
Urate-1C	755430	328545	149888	13154	16878	326422	50024	15904
TOTAL	25319757	13347354	19665144	12655898	10911714	19359311	13369873	6553726
Compound	CP_control_1	CP_control_2	CP_control_3	CP_control_4	CP_isoprenaline_1	CP_isoprenaline_2	CP_isoprenaline_3	CP_isoprenaline_4
2-Oxoglutarate-0C	32293391	29497546	66066002	100227517	108870191	83139576	195682489	130777115
2-Oxoglutarate-1C	2056494	1603413	6199602	10145214	10972478	9627058	19247665	14388903
2-Oxoglutarate-2C	8194288	8079736	16889005	25439147	31729153	27953905	49492442	38728664
2-Oxoglutarate-3C	1237103	1128672	3983266	6288481	5668050	7102569	12573297	10778839
2-Oxoglutarate-4C	100655	84397	784775	2721699	736196	1490048	6731834	4857539
TOTAL	43881931	40393764	93922650	144822058	157976068	129313156	283727727	199531060
Compound	CP_control_1	CP_control_2	CP_control_3	CP_control_4	CP_isoprenaline_1	CP_isoprenaline_2	CP_isoprenaline_3	CP_isoprenaline_4
D-Fructose 6-phosphate-0C	53866255	51584807	66812065	46877108	71372204	56673329	64615099	61761995
D-Fructose 6-phosphate-1C	5014295	4874184	5831420	2180749	4705558	1318307	5705668	4569959
D-Fructose 6-phosphate-2C	6545453	7688386	10485269	4589386	7590415	5566522	6729196	6416635
D-Fructose 6-phosphate-3C	32233511	22798109	34037637	19668997	23761158	27629783	30336348	28274442
D-Fructose 6-phosphate-4C	8733932	8050626	10252221	3163846	8474107	7519925	6983118	7654926
D-Fructose 6-phosphate-5C	7254266	5339302	8382895	2314888	4564971	5769721	5186694	4531084
D-Fructose 6-phosphate-6C	47382710	43931716	67613229	46605486	61986117	50926951	64614682	58978434
TOTAL	161030422	144267130	203414736	125400460	182454530	155404538	184170805	172187475
Compound	CP_control_1	CP_control_2	CP_control_3	CP_control_4	CP_isoprenaline_1	CP_isoprenaline_2	CP_isoprenaline_3	CP_isoprenaline_4
D-Glucose 6-phosphate-0C	106496868	109578214	100171014	69400046	128062718	91412795	105351816	98428757
D-Glucose 6-phosphate-1C	30800260	23044210	22980488	9765115	23668736	17964845	17868544	17365779
D-Glucose 6-phosphate-2C	41024251	26714829	31521206	15977195	4068087	23474955	24016572	24301585
D-Glucose 6-phosphate-3C	72280723	58508349	52194086	29077540	60438316	51050645	50685967	50415988
D-Glucose 6-phosphate-4C	33325654	23709919	21878974	6543936	20244206	16662397	16256473	15238447
D-Glucose 6-phosphate-5C	25746423	17485882	16335648	5971692	10010479	12044753	11773456	11611922
D-Glucose 6-phosphate-6C	91031554	83776773	76697341	54069556	102653788	74328265	87559839	79054220
TOTAL	400705733	342818176	321778757	190805080	349146330	286938655	313512667	296416698
Compound	CP_control_1	CP_control_2	CP_control_3	CP_control_4	CP_isoprenaline_1	CP_isoprenaline_2	CP_isoprenaline_3	CP_isoprenaline_4
Phosphoenolpyruvate-0C	19783430	31614768	30409689	30814869	35309558	25367697	28277102	28707850
Phosphoenolpyruvate-1C	2674507	3581420	3285185	2406197	3131978	2577303	2383069	2591709
Phosphoenolpyruvate-3C	19858443	30485806	31821367	30866893	34029865	24575225	27053860	28157820
TOTAL	42316380	65681994	65516241	64087959	72471401	52520225	57714031	59457379
Compound	CP_control_1	CP_control_2	CP_control_3	CP_control_4	CP_isoprenaline_1	CP_isoprenaline_2	CP_isoprenaline_3	CP_isoprenaline_4
Succinate-0C	46016227	46344989	50031427	47045210	48062274	51936745	39058516	43830710
Succinate-1C	4582927	5315569	6418609	5761840	4389071	6597102	4294587	6291332
Succinate-2C	7850500	10057931	11628371	10913037	7375153	11617515	8666800	11834054
Succinate-3C	2061725	1494367	2882612	2381765	1323630	2370521	1521419	2916941
Succinate-4C	405601	365766	371823	223773	332595	436315	122789	612576
TOTAL	60916980	63578622	71332842	66325625	61482723	72958198	53664111	65485613
Compound	CP_control_1	CP_control_2	CP_control_3	CP_control_4	CP_isoprenaline_1	CP_isoprenaline_2	CP_isoprenaline_3	CP_isoprenaline_4
NADPH-0C	32950969	675803	3892800	50351677	59789162	52589290	81570307	49705107
NADPH-1C	11291286	81261	224592	18496538	22819795	19605830	30889777	18634581
NADPH-2C	12852100	57384	1091090	21726524	26149717	22523145	37958010	22796562
NADPH-3C	13520111		317332	23396100	30190678	24597839	41053084	24622651
NADPH-4C	7899886	43638	201174	14140146	17293939	14672097	25381538	14883614
NADPH-5C	15260905	36741	1122802	26272939	32663726	25458900	45815838	26875669
TOTAL	93775257	894827	6849790	154383924	188907017	159447101	262668554	157518184
Compound	CP_control_1	CP_control_2	CP_control_3	CP_control_4	CP_isoprenaline_1	CP_isoprenaline_2	CP_isoprenaline_3	CP_isoprenaline_4
NADP+-0C	17826443	62302878	76022806	25452607	32224368	30405257	19323273	34165811
NADP+-1C	5242201	21032684	26778147	8259688	9737230	10481790	5457665	11942172
NADP+-2C	7937916	22003823	30493565	11093387	15735883	13129688	9035451	15568875
NADP+-3C	7598930	24540581	31262065	10789546	14060782	13906991	8585066	15998370
NADP+-4C	4011597	13577823	17946100	5790062	8105260	8231811	5376586	9712742
NADP+-5C	8524591	27619537	35908641	13326186	18554646	15508664	11732231	18144437
NADP+-6C	2608629	8782955	13967553	4542218	4743090	4470249	3345030	6718862
NADP+-7C	2264196	6004412	7386470	3863621	3625422	2422886	3109274	5573838
NADP+-8C	1052956	3950937	6859566	3003575	2847542	2416294	1513033	3710305
NADP+-9C	253650	697614	2154102	377802	545010	653228	460387	555588
NADP+-10C	152112	864141	3010709	876024	1048957	551231	261191	1069057
TOTAL	57473221	191377385	251789724	87374716	111228190	102178089	68199187	123160057
Compound	CP_control_1	CP_control_2	CP_control_3	CP_control_4	CP_isoprenaline_1	CP_isoprenaline_2	CP_isoprenaline_3	CP_isoprenaline_4
Pyruvate-0C	7585010	5366646	9929614	7432219	3537626	8862716	5649198	5281773
Pyruvate-3C	96232	179427	364628	3113247	86123	464068	2409666	1791516
TOTAL	7681242	5546073	10294242	10545466	3623749	9326784	8058864	7073289
Compound	CP_control_1	CP_control_2	CP_control_3	CP_control_4	CP_isoprenaline_1	CP_isoprenaline_2	CP_isoprenaline_3	CP_isoprenaline_4
D-Glucose-0C	78605676	72750522	94616478	65347727	73779746	87321506	70146737	51860268
D-Glucose-1C	146758	421907	459632	N/F	234141	193910	91831	186628
D-Glucose-6C	66774215	19311357	6434795	631232	12374489	N/F	294092	1794693
TOTAL	145526649	92483786	101510905	65978959	86388376	87515416	70532660	53841589
Compound	CP_control_1	CP_control_2	CP_control_3	CP_control_4	CP_isoprenaline_1	CP_isoprenaline_2	CP_isoprenaline_3	CP_isoprenaline_4
Glycerone phosphate-0C	18672725	26187587	10885451	38699679	18780159	37041942	45691705	44860247
Glycerone phosphate-1C	1989072	2324145	351349	2484985	792075	3368691	3730516	3803686
Glycerone phosphate-3C	17913390	24737374	10000820	35958689	17433797	33704588	41494484	43720378
TOTAL	38575187	53249106	21237620	77143353	37006031	74115221	90916705	92384311
Compound	CP_control_1	CP_control_2	CP_control_3	CP_control_4	CP_isoprenaline_1	CP_isoprenaline_2	CP_isoprenaline_3	CP_isoprenaline_4
Xanthine-0C	45245187	35682202	46045767	42102472	43504925	53043012	41555916	37567656
Xanthine-1C	2246212	1540935	2183293	2153770	1952763	2576637	2045139	1930091
TOTAL	47491399	37223137	48229060	44256242	45457688	55619649	43601055	39497747
Compound	CP_control_1	CP_control_2	CP_control_3	CP_control_4	CP_isoprenaline_1	CP_isoprenaline_2	CP_isoprenaline_3	CP_isoprenaline_4
Xanthosine 5'-phosphate-0C	672075	467629	1015154	797037	682661	622115	747201	800823
Xanthosine 5'-phosphate-1C	102995	49494	188782	114244	141541	71262	134063	126658
Xanthosine 5'-phosphate-2C	231572	128547	391524	409958	375661	282940	428911	508162
Xanthosine 5'-phosphate-3C	229995	114798	400157	445656	337660	235088	323620	471475
Xanthosine 5'-phosphate-4C	11503	N/F	69402	106475	53372	18865	120495	112966
Xanthosine 5'-phosphate-5C	124125	122777	371271	456331	294689	215091	412735	462718
TOTAL	1372265	883245	2436290	2329701	1885584	1445361	2167025	2482802
Compound	CP_control_1	CP_control_2	CP_control_3	CP_control_4	CP_isoprenaline_1	CP_isoprenaline_2	CP_isoprenaline_3	CP_isoprenaline_4
GMP-0C	544051	225351	364699	937776	713501	443761	757191	840514
Compound	CP_control_1	CP_control_2	CP_control_3	CP_control_4	CP_isoprenaline_1	CP_isoprenaline_2	CP_isoprenaline_3	CP_isoprenaline_4
L-Glutamine-0C	3843341740	2942173186	3674920922	3642916286	3873528418	5795908200	4854536612	2922473739
L-Glutamine-1C	294933554	227694400	283647959	278821906	301298630	455368590	366165650	241959502
L-Glutamine-2C	340925154	297031144	346716065	345011266	386468664	561787659	445001480	375631991
L-Glutamine-3C	90685325	76975190	84177602	82150157	94844723	148036530	112053239	100129802
L-Glutamine-4C	53795273	48417392	50478278	47334550	59032631	96845032	63851123	62048138
L-Glutamine-5C	19387017	17430466	18192088	17218694	22964754	34821408	28339534	23013969
total	4643068063	3609721778	4458132914	4413452859	4738137820	7092767419	5869947638	3725257141
Compound	M_control_1	M_control_2	M_control_3	M_control_4	M_isoprenaline_1	M_isoprenaline_2	M_isoprenaline_3	M_isoprenaline_4
(S)-Lactate-0C	1534734064	1391619812	1409609587	1352317196	1274335958	1302124205	1217244065	1254030436
(S)-Lactate-1C	105469283	96442370	97761672	92137621	90090144	99065610	87074690	90601739
(S)-Lactate-2C	71981479	67307873	66867494	62908100	64005007	73029738	61811598	64403935
(S)-Lactate-3C	1615075545	1453142261	1488377217	1428156249	1325652330	1354334768	1268375258	1317791848
TOTAL	3327260371	3008512316	3062615970	2935519166	2754083439	2828554321	2634505611	2726827958
Compound	M_control_1	M_control_2	M_control_3	M_control_4	M_isoprenaline_1	M_isoprenaline_2	M_isoprenaline_3	M_isoprenaline_4
Urate-media		6019790	6320332	6350446	6973096		6747172	6929833

## Sheet: EXP3_Untargeted
Putative metabolite	retention time	Mass	CP_control_1	CP_control_2	CP_control_3	CP_control_4	CP_isoprenaline_1	CP_isoprenaline_2	CP_isoprenaline_3	CP_isoprenaline_4
(-)-11-hydroxy-9,10-dihydrojasmonic acid 11-beta-D-glucoside	4.03519	390.189	2.50825e+06	1.94906e+06	2.79132e+06	1.58165e+06	1.8611e+06	2.30386e+06	2838686	2.30767e+06
(-)-Camphor	4.0906	152.12	269948	358342	453217	271072	234069	309794	385315	289247
(-)-erythro-(2R,3R)-dihydroxybutylamide	7.37301	119.058	1.5984e+06	821907	1.30203e+06	1.17443e+06	804442	427433	753816	693142
(-)-Jasmonic acid	4.25679	210.126	4.42194e+06	2.89721e+06	3828604	2.6768e+06	3237781	3.72757e+06	3.42698e+06	3.39004e+06
(-)-Menthyl O-beta-D-glucoside	4.54633	318.204	417467	351613	382973	413792	343769	369111	344967	439211
(+)-7-Isojasmonic acid	6.21931	210.126	315325	259236	338188	320136	287238	205586	303140	319250
(+)-Neomenthyl O-beta-D-glucoside	4.91398	318.204	151712	159608	191835	158345	140635	151294	167178	240248
(+)-Prosopinine	4.12434	313.262	215803	160353	267553	147428	184498	145733	246987	197541
(+/-)-5-[(tert-Butylamino)-2'-hydroxypropoxy]-1,2,3,4-tetrahydro-1- naphthol	3.78676	293.199	300404	250869	136530	230652	290639	126000	201340	125247
(1-Ribosylimidazole)-4-acetate	13.0521	258.085	274824	139643	305609	120227	280437	172157	184951	228465
(2E)-2-butylidene-4-hydroxy-5-methyl-3(2H)-furanone	6.29352	168.079	1.77015e+06	1.7367e+06	2.10296e+06	1.99904e+06	1.71784e+06	1.80678e+06	1.87752e+06	2.48756e+06
(2R,3S)-3-Isopropylmalate	9.04411	176.068	224516	225181	206534	207468	201965	201808	208864	216842
(2S)-2-Isopropyl-3-oxosuccinate	7.25919	174.053	9910832	10833922	10777747	9831591	9016894	9018966	8870474	9435355
(2S)-2-Isopropylmalate	13.8835	176.068	0	107198	0	0	127016	0	87222.9	0
(2S,3S)-2-Hydroxytridecane-1,2,3-tricarboxylate	4.47926	332.184	2.22829e+06	2.13772e+06	2.16436e+06	2.08979e+06	2043228	2.03443e+06	1.78665e+06	2.10879e+06
(3R)-hydroxy-N-acetyl-(L)-arginine	12.656	232.117	9222521	14362802	9224259	8.12567e+06	20764274	23081744	17207450	11949196
(3S,4S)-3-Hydroxytetradecane-1,3,4-tricarboxylate	4.43255	346.199	849812	778473	759966	766810	872349	771226	771041	848989
(3S,5S)-carbapenam	9.16613	155.058	731567	297202	496418	527241	303348	294076	225691	314577
(Ac)2-L-Lys-D-Ala	11.0336	301.164	216230	285991	273012	195871	296032	162511	219906	258662
(R)-2,3-Dihydroxy-3-methylbutanoate	8.9033	134.058	171150	110743	104739	118204	91966.7	40860.5	68676.9	101891
(R)-2,3-Dihydroxy-3-methylpentanoate	7.51722	148.074	1.03412e+06	992207	648724	1.23377e+06	886062	1.41308e+06	963358	1.57268e+06
(R)-2-Ethylmalate	10.2307	162.053	128599	122472	118337	129254	104043	120542	99122.4	121810
(R)-3-((R)-3-Hydroxybutanoyloxy)butanoate	13.3364	190.084	0	383637	117841	0	233736	0	234833	0
(R)-Lactate	14.9186	90.0316	742257	1.99245e+06	1063882	973787	1.74772e+06	917119	1.94888e+06	1.15315e+06
(R)-S-Lactoylglutathione	9.95111	379.105	181332	393080	313724	299563	294923	289741	132468	240228
(R,R)-Tartaric acid	18.4633	150.017	79933.6	239899	106342	67193.5	241102	74949	244592	85986.5
(S)-1-Pyrroline-5-carboxylate	15.6626	113.048	884654	1.11492e+06	648150	1.14928e+06	903638	2.89062e+06	681606	1338389
(S)-2-Aceto-2-hydroxybutanoate	7.54233	146.058	2.92007e+06	2940395	2977778	2691068	2.54051e+06	2.73204e+06	2.52871e+06	2.96353e+06
(S)-2-Acetolactate	14.9031	132.042	448464	757011	418966	562970	549659	544259	556688	450295
(S)-2-O-Sulfolactate	18.288	169.989	88190.5	109657	201108	84968.4	70268.1	63146.5	58894	48433.5
(S)-3-Hydroxyisobutyrate	7.25115	104.047	126726	258969	289264	273887	158440	232065	134470	168146
(S)-Lactate	9.84894	90.0316	193791136	130928656	119771616	144469120	131385760	124302168	85709736	130426208
(S)-Malate	16.5698	134.022	61095904	43252312	75876696	68763960	55842932	42646904	50531608	63436144
[FA (11:0)] undecanoic acid	3.89224	186.162	829834	800137	773299	749378	720871	707795	735160	822014
[FA (11:0/2:0)] Undecanedioic acid	9.3335	216.136	235352	258629	247340	220613	236284	222840	212944	256292
[FA (13:0/2:0)] Tridecanedioic acid	7.29281	244.167	492165	467680	453869	401926	514974	431164	461014	347158
[FA (14:0/2:0)] Tetradecanedioic acid	4.77035	258.183	1.21965e+06	1.3376e+06	1.25336e+06	1.40901e+06	1.34762e+06	1353273	1.24757e+06	1.46515e+06
[FA (18:1)] 9Z-octadecenamide	3.91875	281.272	175013	741547	336583	705818	928467	643720	241303	519870
[FA (18:1)] 9Z-octadecenoic acid	3.66923	282.256	7825921	14556630	8.29993e+06	7.74773e+06	9721726	9668081	11696220	9088526
[FA (18:2)] octadecadienoic acid	3.77742	312.23	853646	714040	822355	530938	771994	654414	782243	714858
[FA (18:3)] 9Z,12Z,15Z-octadecatrienoic acid	3.69982	278.225	722177	1.21961e+06	737376	650925	991232	710173	1.19564e+06	664381
[FA (20:1)] 11Z-eicosenoic acid	3.64142	310.287	251353	320825	300693	222291	287572	385435	352783	268805
[FA (22:1)] 13Z-docosenoic acid	3.62727	338.319	261953	214244	111814	106755	242498	163066	113840	206969
[FA (25:0)] pentacosanoic acid	3.57505	382.381	49547.4	92389.6	87422.2	61109.2	101733	83853.3	53721	80024.3
[FA (5:2)] 2,4-pentadienoic acid	7.11886	98.0367	249949	253849	312441	272231	275274	114612	138983	166359
[FA (7:0/2:0)] Heptanedioic acid	13.4803	160.074	235579	398258	394361	250989	340045	250036	325810	440376
[FA (7:1)] 3-heptynoic acid	4.27359	126.068	1.71943e+06	1915669	1.74146e+06	1560157	1.78305e+06	1.59784e+06	1453058	1.58177e+06
[FA (7:2)] 2,4-heptadienal	7.20689	110.073	838381	553004	510862	388918	543938	560641	566421	589381
[FA (8:0)] octanoic acid	7.06969	144.115	245475	241088	333509	244949	227270	261687	243593	265855
[FA amino(14:0)] 2-amino-tetradecanoic acid	4.03739	243.22	0	0	0	0	101418	0	0	0
[FA dimethyl(13:0)] 2,5-dimethyl-2E-tridecenoic acid	3.75401	240.209	326535	236056	119501	119910	135123	264296	361368	251846
[FA dioxo(8:0)] 4,7-dioxo-octanoic acid	4.79558	172.074	1.89436e+06	2.12912e+06	2.18545e+06	2.33369e+06	1.87508e+06	2.10865e+06	2.03321e+06	2.47941e+06
[FA hydroxy(10:0)] 3-hydroxy-decanoic acid	3.9876	188.141	139978	191392	207163	224460	210598	195486	243676	230616
[FA hydroxy(10:0)] 3R-hydroxy-decanoic acid	7.1207	188.141	80002.7	85320.2	73246.6	65474.8	60008.4	59102.7	97900.3	82920.5
[FA hydroxy(10:0)] N-(3S-hydroxydecanoyl)-L-serine	4.51367	275.174	5679916	4.33269e+06	3.7862e+06	3.61634e+06	4865635	4.75616e+06	4.21474e+06	4642601
[FA hydroxy(11:0)] undecanoic acid	3.96058	202.157	87227.7	72663.8	57137.7	62278.7	65748.3	72129.2	0	80295.5
[FA hydroxy(11:1)] undecenoic acid	4.19218	200.141	302107	304988	243196	249775	227241	208832	280684	268859
[FA hydroxy(11:2/11:2)] 2R,9R-dihydroxy-3S,4S,7S,8S-diepoxy-5E,10-undecadien-1-ol	10.849	228.1	521144	766715	899835	592888	452783	928418	907979	479549
[FA hydroxy(18:1)] 12,13-dihydroxy-9Z-octadecenoic acid	4.36855	314.246	367558	439196	386571	357128	325499	361494	324560	457091
[FA hydroxy(18:1)] 9,10-dihydroxy-12Z-octadecenoic acid	3.82802	314.246	611291	581340	514147	365432	552181	465520	625594	561774
[FA hydroxy(18:2)] 13S-hydroxy-9Z,11E-octadecadienoic acid	3.77268	296.235	277716	292969	277368	246287	340564	246766	500515	335715
[FA hydroxy(7:1/2:0)] 2,4-dihydroxy-2-heptenedioc acid	9.09903	190.048	96737.3	113596	98464	97907.4	91809.4	93694.9	85805.6	103961
[FA hydroxy,methoxy(18:0)] 12,13-dihydroxy-11-methoxy-9-octadecenoic acid	4.22979	344.256	308526	269089	256241	266946	265615	243014	266900	336286
[FA methoxy,hydroxy(18:2)] octadecadienoic acid	3.73598	326.246	480136	413004	461107	292207	397950	452343	367577	331239
[FA methyl(12:0/2:0)] 2-methyl-dodecanedioic acid	3.99337	244.167	306275	378467	468072	282044	367235	306678	325351	366837
[FA methyl(12:1)] 2-methyl-2-dodecenoic acid	4.88349	212.178	54207.5	104013	119084	103353	109372	92225.1	61941	95195
[FA methyl(13:0/2:0)] 2-methyl-tridecanedioic acid	6.06334	258.183	34422.6	155330	128284	117643	41247.2	62919.8	51959.6	179505
[FA methyl(14:0/2:0)] 3-methyl-tetradecanedioic acid	4.73894	272.199	521122	529222	494380	382540	428732	453290	450638	614160
[FA methyl(14:0/2:0)] 5-methyl-tetradecanedioic acid	3.92253	272.199	460615	448620	545434	377598	315675	347201	382764	398333
[FA methyl(16:0)] 14-methyl-hexadecanoic acid	7.06491	270.256	136949	140939	132564	126538	114628	136627	137425	137540
[FA methyl(18:0)] methyl 10,12,13,15-bisepidioxy-16-hydroperoxy-8E-octadecenoate	3.85857	388.21	3481518	2.9161e+06	2.87645e+06	2.3712e+06	2.4096e+06	2694998	2.8672e+06	2867971
[FA methyl(20:2)] eicosadienoate	3.88091	414.226	2.22216e+06	1.37076e+06	1.82779e+06	1.19955e+06	1.19629e+06	1239900	1.90278e+06	1.28483e+06
[FA methyl,hydroxy,oxo(18:0)]octadecenoate	3.80037	342.24	866992	749207	771422	476078	629749	695302	658098	805687
[FA methyl,hydroxy,oxo(5:2/4:0)] methyl 4-[2-(2-formyl-vinyl)-3-hydroxy-5-oxo-cyclopentyl]-butanoate	4.66756	254.115	1259151	1.23141e+06	1.52535e+06	1.50119e+06	905609	725854	751026	1.44462e+06
[FA oxo(14:0)] 3-oxo-tetradecanoic acid	3.86421	242.188	504874	418476	408531	331951	318436	345596	420479	428108
[FA oxo(16:2)] cyclopentanehexanoic acid	3.82802	268.204	174123	197884	207460	185711	215740	215521	158109	217421
[FA oxo(5:0)] 3-oxo-4-pentenoic acid	6.24809	114.032	60147.8	105323	115658	86428.2	95961.7	102580	142348	74891.4
[FA oxo(5:1/5:0)] (1S,2R)-3-oxo-2-(2'Z-pentenyl)-cyclopentaneacetic acid	7.12008	210.126	141557	119492	117149	184475	139995	126575	154936	113444
[FA oxo(7:0)] 2-oxo-heptanoic acid	6.28723	144.079	463552	720141	818429	724588	719289	847710	966484	420581
[FA oxo(8:1)] 5-oxo-7-octenoic acid	4.29727	156.079	334196	645020	500522	510752	538626	412788	596159	663190
[FA oxo,amino(6:0)] 3-oxo-5S-amino-hexanoic acid	12.8044	145.074	98931.2	197098	166774	76581	248215	170507	189217	139882
[FA trihydrox] 9S,11R,15S-trihydroxy-2,3-dinor-13E-prostaenoic acid-cyclo[8S,12R]	3.85846	328.225	592634	468520	444112	378005	437520	400237	520426	402013
[FA trihydroxy(18:1)] 9S,12S,13S-trihydroxy-10E-octadecenoic acid	4.24672	330.241	225514	220996	223040	200221	209734	190936	228103	249791
[FA trihydroxy(4:0)] 2,3,4-trihydroxy-butanoic acid	12.9438	136.037	9079337	17383140	10697357	7984051	16492878	5753219	15191901	8868848
[FA trimethyl(13:0)] 4,8,12-trimethyl-tridecanoic acid	7.04676	256.24	3.47788e+06	3.78789e+06	3619546	3706279	3.58211e+06	3.67658e+06	3.69727e+06	3709184
[FA] Methyl jasmonate	4.04139	224.141	376560	287990	155700	237503	286737	259354	355986	272225
[Fv] Isochamanetin	9.64044	362.115	131319	52479.7	103475	99369.1	93969	86479.7	128820	82620.7
[Fv] Praecanson A	7.76964	380.162	13954.8	22587.6	24162.1	10226.5	22487.2	26462.4	20318.9	19321.6
[LysoPC(14:0)] 1-tetradecanoyl-sn-glycero-3-phosphocholine	4.52423	467.301	1.213e+06	984362	976282	998022	690775	916416	571465	896653
[LysoPC(16:2)] 1-hexadecyl-sn-glycero-3-phosphocholine	4.45824	481.353	1.36116e+06	1.86081e+06	1.19039e+06	1.42669e+06	1.10126e+06	1.45563e+06	860632	1.4261e+06
[PA(16:0/0:0)] 1-hexadecanoyl-2-sn-glycero-3-phosphate	4.41382	410.243	214985	340179	260257	262614	189571	297578	135704	331874
[PC acety] 1-acetyl-sn-glycero-3-phosphocholine	10.3303	299.113	828052	365075	719126	653968	563193	379218	422308	474118
[PC(16:1)] 1-(1Z-hexadecenyl)-sn-glycero-3-phosphocholine	4.44797	479.337	623424	559207	426553	379454	248393	364330	360842	461055
[PC] 2-valeryl-sn-glycero-3-phosphocholine	4.24106	341.161	366695	342618	451262	374340	451633	324168	337850	388891
[PR] (-)-Carvone	4.38405	150.105	137746	73105	83368.3	128311	84150.4	88097.2	119260	54084
[PR] (+)-Bornane-2,5-dione	7.25029	166.099	450673	511906	428950	454299	393078	429467	542516	317099
[PR] 4-Hydroxymytiloxanthin	5.30323	614.397	881023	1.20646e+06	1.19927e+06	1.16621e+06	975638	1.15278e+06	1.08968e+06	1.28387e+06
[PR] 4-Oxomytiloxanthin	7.58665	612.38	56801.3	39550.9	36086.9	32633.7	31665.3	41820.1	0	29905.1
[PR] Flakinin A	3.96424	280.131	500065	261060	368970	235645	276765	275851	430067	337767
[PR] Iridotrial	4.63927	182.094	7507466	6792518	7.63859e+06	6.32268e+06	6.3708e+06	7.03486e+06	5.22876e+06	6.62128e+06
[PR] Tretinoin/All-Trans Retinoic Acid	3.82903	300.209	820260	364388	359290	0	439985	290642	480077	516303
[SL (6:0/6:0)] 2,3-di-0-hexanoyl-alpha-glucopyranose	3.99175	376.21	1.52085e+06	685231	1.0991e+06	501446	736630	918792	1.09269e+06	895136
[SP (14:0)] 1-deoxy-tetradecasphinganine	7.06192	229.24	122865	121692	113469	102816	115644	119248	124905	116024
[SP (3:0)] sphinga-4E,8E,10E-trienine	3.98909	295.251	518449	336172	375450	331826	438679	224673	830937	281332
[SP hydroxy,hydroxy,methyl(10:2/2:0)] 6R-(8-hydroxydecyl)-2R-(hydroxymethyl)-piperidin-3R-ol	3.89974	287.246	145070	243085	268793	228856	301351	225845	100775	308407
[SP] Sphing-4-enine-1-phosphate	4.88794	379.248	332422	509358	481980	516929	398304	374848	234615	476053
[ST hydrox] 3alpha,7alpha-Dihydroxy-5beta-cholan-24-oic Acid	4.38278	392.292	378936	900966	419953	256556	1.79726e+06	255306	625225	1.02013e+06
[ST hydrox] N-(3alpha,7alpha-dihydroxy-5beta-cholan-24-oyl)-taurine	4.06677	499.296	0	68348.2	86068.7	0	69873	156252	0	65632.9
1(2H)-Isoquinolinone	10.2796	145.053	180547	150811	213520	191252	200612	164471	554733	252276
1-(beta-D-Ribofuranosyl)-1,4-dihydronicotinamide	8.67028	256.106	3522814	2.11172e+06	2.83277e+06	2.93408e+06	2.54432e+06	1.6227e+06	1.7642e+06	2.8291e+06
1,2-Dihydroxymint lactone	5.65213	198.089	1.24799e+06	1.381e+06	1.74134e+06	1.47379e+06	1.00851e+06	1156311	3254422	2.06948e+06
1,3,5-trimethoxybenzene	4.49082	168.079	8929149	8.20705e+06	8584093	7860945	7854498	8.03872e+06	7314239	8.12646e+06
1,4-Bis(2-ethylhexyl) sulfosuccinate	3.5546	422.234	19742.3	50984.6	66463.5	32076.7	76319.9	43458.3	78140.8	59550.5
1,6-Dihydroxy-5-methylcyclohexa-2,4-dienecarboxylate	7.20202	170.058	12163973	14111370	12845167	11066023	14319312	12258650	11501201	13440991
1,8-Diazacyclotetradecane-2,9-dione	4.84234	226.168	29265360	30370822	28439312	30878526	29550580	27812494	26502676	28316672
1,9S,11R,15S-tetrahydroxy-13E-prostaene	3.84156	342.277	449541	448879	585405	488292	481615	381928	370418	426777
10-hydroxygeraniol	3.99266	170.131	284611	302925	277784	321186	264876	315211	310725	295159
10-oxogeranial	4.33516	166.099	2.94327e+06	1.95413e+06	2.52383e+06	1.69051e+06	2.2652e+06	2.28054e+06	2.44643e+06	2.33205e+06
12-OPDA	3.83489	292.204	0	94929.9	0	0	105851	0	97168	109347
13-14-DihydroPGF-1a	4.04572	358.272	212775	190872	214223	181323	141715	224887	247104	252187
1-4-beta-D-Glucan	3.71924	536.159	0	153519	113366	93734.8	219321	137989	0	90713.5
1H-Imidazole-4-ethanamine	28.6609	111.08	136729	113647	105263	115917	155846	143654	225336	125815
1-methylguanosine	9.51561	297.107	526830	263655	421247	372122	486700	241277	304270	436013
1-Methylhypoxanthine	8.19895	150.054	1.15366e+06	647137	1.04619e+06	812431	1.00485e+06	462592	686346	901412
1-O-(8R-hydroxy-8-methyl-3Z,9-decadienoyl)-beta-D-glucopyranose	4.30163	360.179	2.88831e+06	2.30767e+06	2787035	2218036	2.27463e+06	2.38835e+06	2.605e+06	2.39577e+06
1-O-Methyl-myo-inositol	13.3954	194.079	515034	272051	483864	189912	263805	0	271250	190446
1-Phenyl-3-(phenylsulfonyl)-2-propen-1-one	7.78584	272.051	40562.8	0	26053.4	27476.3	38564	38821	25281.2	27998.6
1-Pyrroline-2-carboxylate	7.70364	113.048	3.97737e+06	3.67531e+06	2700586	4478069	2.93155e+06	4.56623e+06	2.37606e+06	2.63441e+06
1-thio-β-D-glucose	18.8741	196.04	139420	474314	351427	152502	393672	72402.6	301543	136382
2-(2-Methoxyphenyl)-4H-furo[2,3-h]-1-benzopyran-4-one	7.77422	292.073	134296	380758	278777	313742	234006	292618	243946	314931
2-(5'-methylthio)pentylmalate	4.5333	250.087	0	0	0	0	0	0	0	0
2-(Acetamidomethylene)succinate	13.4139	187.048	0	1.07015e+06	316713	108108	906597	87477.3	1.0709e+06	207555
2-(Hydroxymethyl)-3-(acetamidomethylene)succinate	20.6086	217.059	179226	152087	183247	122861	153988	47178.8	114571	138823
2,2-Dimethyl-3-[4-(acetyloxy)phenyl]-4-ethyl-2H-1-benzopyran-7-ol acetate	3.93141	380.162	725620	643178	573697	455821	458698	464204	542977	507787
2,3,4,5-Tetrahydrodipicolinate	7.35554	171.053	252723	256022	189053	232690	224714	160089	147274	221109
2,3,5-Trihydroxytoluene	7.15956	140.047	914951	974623	1.02274e+06	585337	821704	1.20316e+06	1.30204e+06	560327
2',3'-Cyclic CMP	12.6586	305.041	117436	51347.8	47822.3	0	129933	0	281543	0
2',3'-Cyclic UMP	10.838	306.025	65620.2	32057.6	70152.1	35256.8	78631.9	52743.2	116289	73903.3
2,3-Diaminosalicylic acid	9.13717	168.053	97833.7	78256.8	121220	114885	100017	97231.9	87611.2	87353.1
2,3-Dihydroxycyclopentaneundecanoic acid	4.62208	286.214	183695	258892	204910	269934	255483	209329	164027	278042
2,3-Dimethylmaleate	13.4743	144.042	0	519602	104163	0	593973	0	562415	84381.6
2,4,6-Trihydroxytoluene	4.84427	140.047	955860	896244	937840	867717	901505	844951	748990	965122
2,5,6-Trihydroxy-5,6-dihydroquinoline	17.2274	179.058	0	12451.5	27925.8	0	31075.7	0	25139.5	0
2,5-Dioxopentanoate	12.7291	130.027	3.19487e+06	5.60072e+06	3.64696e+06	3.22609e+06	4.42701e+06	3.19867e+06	4.72399e+06	3357838
2,6-Dihydroxyphenylacetate	6.14946	168.042	1.2737e+06	1.29939e+06	2.29106e+06	2.09082e+06	1.51329e+06	1.54955e+06	967115	2.43829e+06
2,6-Dimethoxyphenol	4.08301	154.063	868015	403518	755391	327285	387684	510262	911544	467848
2,6-Dimethylaniline	7.0925	121.089	238046	261250	252276	236849	224064	264411	216719	240138
2,7-Anhydro-alpha-N-acetylneuraminic acid	13.374	291.095	0	257148	185331	0	328665	0	221417	0
2-acetamidoglucal	11.49	203.08	447501	442556	619050	370071	659524	185379	388944	401629
2-Acetolactate	7.2731	132.042	607855	827035	575502	706330	587089	620540	608692	901877
2-Butenoate	12.9317	86.0367	136454	271443	198039	121240	222187	262718	239423	184739
2-chloro-3-methyl-maleylacetate	15.4433	205.998	232488	210019	201349	179252	167346	289449	137994	209001
2-C-Methyl-D-erythritol 4-phosphate	14.3275	216.04	10028854	34011128	12582858	9642900	32976310	16315719	33013096	11158857
2-Dehydro-D-xylonate	16.6476	164.032	52836.1	85242	62517.8	53177.6	89469.8	52493.8	121099	91573
2-deoxyglucose-6-phosphate	14.5248	246.05	479611	1.69015e+06	460344	476804	815333	138211	612319	488818
2-Ethylhexyl phthalate	3.74337	278.152	11783816	7.2754e+06	9802914	8.03328e+06	9378833	6515875	7721929	9914607
2-Furoate	7.1966	112.016	7871003	9266133	8916666	8.13836e+06	7.80472e+06	7.56584e+06	7936712	9748309
2-Hydroxy-1,3-dimethoxy-8,9-methylenedioxycoumestan	5.1678	356.053	0	0	0	0	0	0	0	0
2-hydroxy-2-(hydroxymethyl)-2H-pyran-3(6H)-one	5.78734	144.042	1.09504e+06	1.20137e+06	1.0513e+06	1.11969e+06	1.2282e+06	1.17271e+06	914468	1.19698e+06
2-Hydroxy-2,4-pentadienoate	14.6933	114.032	219138	103425	211965	195518	268516	525508	294603	213097
2-Hydroxy-3-(4-hydroxyphenyl)propenoate	8.23056	180.042	129195	61813.8	99839.3	87063.4	82548.5	50692.7	63535.7	85296.2
2-hydroxy-3-carboxy-4,5-cyclopropylhex-5-enoate	13.6383	186.053	274296	309058	496158	259473	319804	304826	290032	239174
2-Hydroxy-6-oxo-7-methylocta-2,4-dienoate	5.77319	184.074	3.57919e+06	2.13524e+06	2.28556e+06	2.15245e+06	1.12444e+06	1.71423e+06	974919	3.45724e+06
2-Hydroxy-6-oxoocta-2,4,7-trienoate	7.09991	168.042	1.18461e+06	1.04193e+06	865518	885465	875605	340116	255358	1.16556e+06
2-Hydroxy-6-oxo-octa-2,4-dienoate	6.59106	170.058	2.91657e+06	2.07717e+06	2.55964e+06	2.50446e+06	3.39446e+06	4552432	1.45976e+06	2.43505e+06
2-Hydroxyadenine	9.09839	151.049	331543	152308	195280	148364	204098	131970	147303	225149
2-Hydroxy-cis-hex-2,4-dienoate	7.60744	128.047	1.36065e+06	1.57519e+06	1.35755e+06	1.57089e+06	1.25099e+06	1.48632e+06	1.52876e+06	1.45667e+06
2-Hydroxycyclohexan-1-one	6.37916	114.068	582907	708255	721704	453815	748633	689556	679042	469471
2-Hydroxydecanedioicacid	4.78763	218.115	910839	894644	929763	1.0136e+06	962945	882412	799532	1.03574e+06
2-Hydroxyethanesulfonate	11.3799	125.999	67580.7	152022	110674	78757.9	133454	64712	138810	69412.6
2-hydroxypurine	10.3218	136.039	3.39339e+06	272665	1.52538e+06	1.0855e+06	595138	853891	3.29442e+06	397097
2-Isopropylmaleate	7.26281	158.058	127102	80303.5	98886	87358.2	124973	105971	88094.2	88399.2
2-Maleylacetate	9.03149	158.022	23379.7	31410	25064	31016.6	24893.5	25565.6	24591.6	25541.6
2-Methylbutyroylcarnitine	4.35722	245.163	5.00261e+06	4.00381e+06	4848401	3818846	3.99797e+06	4.38507e+06	4.11198e+06	4.62404e+06
2-Methylcitrate	17.6888	206.043	0	98666.5	16404.5	0	104126	0	139281	25224.1
2-Methyleneglutarate	14.3395	144.042	0	678875	0	0	675702	0	865289	0
2-Octenedioicacid	7.22846	172.074	4.76045e+06	8935034	10044500	6132537	6701098	12770136	11984148	5.40778e+06
2'-O-Methyladenosine	14.4608	281.113	1268958	956828	842894	1.14088e+06	903031	643533	689520	856927
2-O-Methylcytosine	7.44787	125.059	110180	69366	113716	77535.3	97759.4	79564.6	78758.1	82631.4
2-Oxo-4-hydroxy-5-aminovalerate	9.86731	147.053	2.28655e+06	1323363	1.77524e+06	1.86034e+06	1.98681e+06	1.01931e+06	1.09243e+06	1.63264e+06
2-Oxoadipate	15.3889	160.037	0	135333	75813.8	0	121489	0	46072.4	0
2-oxobut-3-enanoate	7.22096	100.016	357306	433699	431056	468690	400560	275907	284608	435626
2-Oxobutanoate	14.8145	102.032	0	82329.6	127942	0	128347	171252	127626	172008
2-Oxo-delta3-4,5,5-trimethylcyclopentenylacetate	7.1472	182.094	909751	940533	836098	1.00724e+06	1.29002e+06	837779	1.6948e+06	1033208
2-Oxoglutaramate	7.85777	145.038	347239	475267	396876	394317	527576	534187	539356	458884
2-Oxoglutarate	16.2218	146.022	6504482	3.41943e+06	8009465	5.37497e+06	3.97962e+06	2497503	4.08963e+06	4.36885e+06
2-Oxohept-3-enedioate	11.6513	172.037	137984	185255	160309	144066	183324	148779	155596	148416
2-oxopenta-3,4-dienoate	5.78945	112.016	683350	660990	580887	730424	741532	679808	617051	819676
2-oxopimelate	5.79162	174.053	449190	480884	594236	619166	522801	469344	578354	564252
2-oxosuberate	6.24051	188.069	215483	384033	313290	187983	253108	400404	249214	246615
2-Oxosuccinamate	9.0876	131.022	59269.6	108670	106533	106469	141281	204910	175222	108886
2-S-Glutathionyl acetate	16.6394	365.089	3006407	32599854	17454394	5.42805e+06	27856786	4619867	18021550	10455352
2S-Hydroxytetradecanoic acid	3.8759	244.204	149508	184554	124687	159577	229244	181040	199058	196771
2-sinapoyloxy-3-butenylglucosinolate	17.9937	595.103	156970	138995	131948	142158	115970	78967.5	107039	132449
3-(2,3-Dihydroxyphenyl)propanoate	4.92285	182.058	465028	513345	626655	502644	513891	646752	476080	604406
3-(3,4-Dihydroxyphenyl)lactate	6.0473	198.053	198088	363967	308866	262494	298036	470840	357719	270403
3-(4-Hydroxyphenyl)lactate	9.24726	182.058	7.15584e+06	3.24986e+06	4.86742e+06	5.06178e+06	3.00005e+06	2.31334e+06	2231449	3261578
3-(4-Hydroxyphenyl)pyruvate	7.23082	180.042	139710	263306	273116	175282	249413	323832	317901	154549
3-(Pyrazol-1-yl)-L-alanine	12.5512	155.07	1.22027e+06	1094518	1.25451e+06	930559	2.00698e+06	1.38302e+06	1.4359e+06	1.12806e+06
3,3-dichloro-propionic acid	6.54437	141.959	147251	245166	196382	136574	155003	234097	145724	133227
3,3-Dimethylglutaricacid	6.4866	160.074	2775415	1.498e+06	1.11873e+06	2.40344e+06	3.88242e+06	3240565	2.89888e+06	1.35084e+06
3,4-Dihydro-2H-Pyrrole-2-carboxylate	9.18479	113.048	916093	584618	794123	846893	760596	543309	505479	739392
3,4-Dihydroxymandelaldehyde	4.85131	168.042	5.21589e+06	4.98238e+06	5.32377e+06	5643515	5.21756e+06	5.34137e+06	4413770	5.19944e+06
3,4-Dihydroxyphenylacetaldehyde	6.29061	152.047	270410	445255	514278	276909	311525	416521	416290	309029
3,5,7-Trimethyl-2E,4E,6E,8E-undecatetraene	3.96355	190.172	0	0	0	0	121879	0	0	0
3,5/4-Trihydroxycyclohexa-1,2-dione	10.1782	160.037	667182	681565	695120	615916	640556	602206	607304	716728
3',5'-Cyclic AMP	9.39312	329.052	457616	361976	474808	402441	573563	315267	338701	508348
3,5-dihydro-5-methylidene-4H-imidazol-4-one	13.1241	196.096	0	0	0	0	0	0	0	0
3,5-dihydroxyanisole	4.30877	140.047	349239	345191	360897	288812	279882	254305	412512	312840
3,6,8-Trimethylallantoin	12.6588	200.091	0	296195	151570	0	314423	283581	306406	233158
3,6-Nonadienal	4.19945	138.104	1.28524e+06	779002	1.04895e+06	610435	873940	854166	1.03281e+06	1.02928e+06
3,7-Dimethyl-2E,6E-decadien-1,10-dioic acid	4.11902	226.121	1.88253e+06	1.07392e+06	1.54947e+06	855439	929746	1459689	1.7701e+06	1.26506e+06
3-acetamidopropanal	8.05811	115.063	53311.7	55270.6	105405	105285	78112.3	66369.6	37046.9	97785.3
3-acetyl-3-methyldihydrofuran-2(3H)-one	4.82696	142.063	956038	802697	815857	807143	906841	865640	678466	838452
3-Amino-2-piperidone	10.4168	114.079	0	105590	67094.8	74520.4	167683	45945.8	61403.7	64597.1
3-Aminobenzenesulfonate	5.18217	173.015	127940	59947.4	79837.3	81011.7	100382	96682.2	86885.6	113339
3'-AMP	16.5367	347.063	326478	108228	321520	377321	100677	392006	101285	395738
3-Butylidene-7-hydroxyphthalide	3.79999	204.079	154865	125607	156017	343235	276718	142382	150192	289999
3-Butynoate	13.5171	84.0211	0	190937	0	0	315795	0	207263	0
3-carboxy-4-methyl-5-propyl-2-furanpropanoic acid	6.10497	240.099	229377	453095	350822	362890	359690	383619	409581	420157
3-Dehydrocarnitine	6.10993	159.09	71764.9	118600	99343.4	96408.5	58398.2	139751	175306	50980
3-Dehydroquinate	11.1939	190.048	85259.3	85207.8	107260	66751.2	125453	82284.1	114714	76470.1
3-Dehydroxycarnitine	9.23547	145.11	184362	151233	149542	145508	203329	133466	151517	172272
3-Dimethylallyl-4-hydroxymandelic acid	4.37434	236.105	729272	537306	636644	549965	614870	616160	445051	692533
3-Ethylcatechol	4.86088	138.068	258852	290612	343318	311663	225322	259258	321906	299345
3-Ethylmalate	14.3457	162.053	0	437947	0	0	481539	0	481172	0
3-Furoicacid	12.7065	112.016	91900.8	478006	235854	139061	442739	208209	354479	247426
3-Hexenal	7.27246	98.0731	3237602	3300100	3.29558e+06	3221642	2.67118e+06	2.87766e+06	2.70516e+06	3.28102e+06
3-Hydroxyanthranilate	12.2114	153.043	252408	106989	159243	130566	113120	50146.8	79632.7	75861.2
3Hydroxycoumarin	6.39756	162.032	705663	805089	751706	703266	590167	673920	927341	458155
3-Hydroxydodecanedioicacid	4.53702	246.147	558638	474526	515404	437874	420087	435865	534040	513744
3-Hydroxyisoheptanoicacid	6.23033	146.094	97869.4	107289	100318	134437	106845	97385	87464.6	108018
3-Hydroxypropenoate	14.9066	88.0159	0	117415	0	0	60789.6	0	132551	46252
3-Hydroxysubericacid	7.95818	190.084	307981	315059	311578	308496	314686	289458	262223	325438
3-Indoleglycolaldehyde	9.52133	175.063	276807	374816	611591	457868	459806	438510	531471	420348
3-Isopropylbut-3-enoic acid	11.5166	128.084	63061.6	126137	104600	80133.1	132855	74353.2	133541	77606.9
3-Isopropylcatechol	4.08937	152.084	594362	459259	549322	533451	639248	728967	795607	674024
3-Ketosphingosine	3.83564	297.267	1.14875e+06	736815	677579	923773	825726	429082	710296	760350
3-Methoxy-4-hydroxyphenylacetaldehyde	4.30928	166.063	843788	676577	815959	679326	701813	779443	736471	679600
3-Methoxy-4-hydroxyphenylethyleneglycol	6.33736	184.074	3890788	6219032	8.29941e+06	4.2633e+06	5.29797e+06	8907263	9792976	3.42955e+06
3-Methyl-1-(2,4,6-trihydroxyphenyl)butan-1-one	6.14296	210.089	388871	495591	432311	294040	394986	550714	426702	575629
3-Methyladipicacid	7.24857	160.074	8651052	7.59739e+06	7939441	7.82449e+06	6.89693e+06	6658759	7.32345e+06	8613684
3-Methylbutanoic acid	7.23976	102.068	1.41873e+06	1.03308e+06	1.21495e+06	1.1375e+06	1.01203e+06	1.14626e+06	1.1081e+06	1.20986e+06
3-Methyleneoxindole	9.66865	145.053	300711	361440	593431	489288	495557	467229	554733	468595
3-Methylglutarylcarnitine	5.86651	289.153	1.03415e+06	1.22422e+06	1.14953e+06	1.23539e+06	1.148e+06	1.08383e+06	1.14326e+06	1.44573e+06
3-Methylguanine	9.34089	165.065	877341	493402	433048	488717	553427	369685	356922	574162
3-methylphosphoenolpyruvate	17.0311	181.998	258220	676140	469807	312771	568438	307925	550350	339128
3-nitro-2-butanol	9.6125	119.058	1293726	869685	1.043e+06	944134	1.03564e+06	599241	686651	956234
3-O-Methyl-myo-inositol	10.5653	194.079	130264	25725.5	72676.8	42292.9	43599.3	39645.8	101642	41390.6
3-Oxo-4-methylpentanoic acid	4.74195	130.063	297786	355384	326432	338639	302007	440381	397657	328121
3-Oxododecanoic acid	4.04472	214.157	1.34546e+06	1250407	1.40288e+06	1215218	1.21824e+06	1.27683e+06	1.27825e+06	1.36608e+06
3-Phospho-D-glycerate	17.4101	185.993	249624	1068297	637056	331264	1.12752e+06	294250	1.5139e+06	293472
3-Succinoylpyridine	5.1138	179.058	43052.9	26504.5	30534.9	33484.6	48901.3	41741.8	32743.5	47427.8
3-sulfopropanoate	17.1548	153.994	0	280563	67904.4	0	304129	0	315481	0
3-tert-Butyl-5-methylcatechol	4.09831	180.115	429872	221736	301591	199734	256433	227914	375346	226132
3'-UMP	18.2232	324.036	134415	131599	137280	146195	115176	112406	115312	169229
3-Ureidopropionate	12.119	132.053	381312	417203	411487	301240	293929	141495	223674	163669
4-(Trimethylammonio)but-2-enoate	12.9295	143.095	251988	181647	244554	309334	191403	198551	168884	208509
4,8-Dimethyl-1,3E,7-nonatriene	4.12863	150.141	189465	391762	284895	380671	263453	261536	174807	253524
4-8dimethylnonanoylcarnitine	3.78103	329.257	465296	337748	336822	293726	310187	388616	205020	272367
4-Aminobenzenesulfonate	6.41358	173.015	296037	143748	211036	209724	282106	286490	275922	147413
4-Aminobutanoate	15.4128	103.063	732093	1.46419e+06	2.05602e+06	681863	1.13983e+06	914941	903925	522145
4-fluorotryptophan	10.4654	222.081	1.49358e+06	362256	395262	823251	558559	976442	368562	544821
4-Guanidinobutanoate	14.7656	145.085	1.46762e+06	1254793	4.43257e+06	1.24787e+06	1.79706e+06	1.72043e+06	1.29616e+06	1.24765e+06
4-Hexyloxyphenol	4.08241	194.131	2.12879e+06	990281	1.55363e+06	880513	1.07347e+06	1.09649e+06	1.54967e+06	1.19078e+06
4-Hydroxy-2-oxopentanoate	13.5289	132.042	0	62532.4	0	0	58467.4	0	62414.6	0
4-hydroxy-5-methyl-2-propyl-3(2H)-furanone	5.89457	156.079	996890	1351877	1.36223e+06	759914	1.03091e+06	1.45414e+06	1.32745e+06	733407
4-Hydroxybenzaldehyde	7.23285	122.037	6522124	8598035	9425533	6.78284e+06	7030604	11489208	7.3205e+06	7854408
4-Hydroxybutanoic acid	8.16591	104.047	538364	566188	551727	543172	462737	503013	476883	568329
4-Hydroxycinnamyl alcohol 4-D-glucoside	4.4486	312.121	591768	534547	588703	469757	456746	429631	529708	586242
4-Hydroxycinnamyl aldehyde	4.68283	148.052	126505	177066	138583	167219	120992	163331	138195	151003
4-Hydroxyhexan-3-one	6.95124	116.084	283238	263807	234741	204023	199321	237974	237876	621297
4-Hydroxyphenylacetylglycine	9.81193	209.069	203421	160577	274378	200609	213087	167053	304878	177979
4-Hydroxyphenylethanol	4.37519	138.068	2830568	2112294	2.53433e+06	1.97881e+06	2.29977e+06	2.08916e+06	2321361	2.22778e+06
4-Hydroxyphenylglyoxylate	13.3945	166.027	560980	1.13187e+06	825419	550721	967335	683211	1.01528e+06	579334
4-Imidazolone-5-acetate	13.4547	142.038	172211	335629	350447	132057	437275	0	253054	291187
4-Imidazolone-5-propanoate	8.41671	156.053	6.36408e+06	2.57298e+06	5788543	5049791	4412216	4.83817e+06	6182129	4420866
4-Methyl-2-oxopentanoate	7.26397	130.063	8.10213e+06	13792625	11421138	11974786	12069017	10239255	12582747	14076908
4-methyl-3-oxoadipate	9.25138	174.053	2.71431e+06	2.84457e+06	2.89802e+06	2.83808e+06	2.71699e+06	2.64673e+06	2455215	2.89427e+06
4-Methylbenzyl alcohol	5.85496	122.073	853891	828064	986828	875369	752902	639505	1.2089e+06	1.14931e+06
4-Methylpentanal	3.97245	100.089	0	0	0	0	0	0	0	0
4-Nitroaniline	7.57534	138.043	181093	303920	155909	227316	608387	166183	179355	206146
4-oxo-4-(3-pyridyl)-butanoate	8.38199	179.058	3.79507e+06	2.54377e+06	2.5566e+06	2.84965e+06	3.81468e+06	3.54968e+06	5213941	3263297
4-Oxocyclohexanecarboxylate	7.34263	142.063	2250130	2.39985e+06	1.70199e+06	2.60628e+06	2.33986e+06	2.37965e+06	1.98466e+06	2.71816e+06
4-Oxoglutaramate	10.7542	145.038	78292.8	90474.7	137952	81401.8	229693	89965.9	97534.9	96079.1
4-Propylphenol	4.09081	136.089	420226	231171	295189	219643	237498	286018	404246	255213
4-Pyridoxate	4.65942	183.053	0	0	0	0	0	0	0	0
4-Pyridoxolactone	9.8845	165.043	428444	439066	400734	365903	393320	389582	387789	449324
4-Trimethylammoniobutanoate	12.8084	145.11	6.39558e+06	4.06499e+06	7238898	5.75128e+06	5.85986e+06	2.85932e+06	3.74744e+06	5.61881e+06
5,3'-Dihydroxy-4',5'-dimethoxy-6,7-methylenedioxyisoflavone	7.22674	358.069	1.48308e+06	1.58917e+06	1.69568e+06	1.4578e+06	1.87181e+06	1.54886e+06	1.5312e+06	1.76779e+06
5,6,7,8-Tetrahydro-2-naphthol	4.12817	148.089	547117	487318	627010	379336	540327	503123	549765	599866
5,6-Dihydrothymine	12.2809	128.059	0	35110.6	23187.2	12502.4	30447.6	11173.1	51248	14883.1
5-6-Dihydrouridine	9.84213	246.085	639812	482046	651935	549310	573850	320109	451019	607376
5-Acetamidopentanoate	7.23923	159.09	1.1194e+06	1.10738e+06	1.02624e+06	916421	1.17586e+06	980533	1.09475e+06	1.26242e+06
5-Aminolevulinate	14.218	131.058	15906201	60800564	19974550	13469707	66845472	16432989	59506988	17644386
5-Aminopentanoate	15.2057	117.079	1.10473e+06	1177252	2.07042e+06	1.00681e+06	1.52533e+06	1.14835e+06	1.21098e+06	949215
5-D-(5/6)-5-C-(Hydroxymethyl)-2,6-dihydroxycyclohex-2-en-1-one	6.3899	158.058	1.17716e+06	1.96946e+06	2.32933e+06	1.65096e+06	1.37892e+06	2691616	2607472	1.24381e+06
5-exo-Hydroxy-1,2-campholide	4.28242	184.11	503523	296938	451404	359899	339475	405890	425221	426192
5-Guanidino-2-oxopentanoate	14.1209	173.08	1.05525e+06	891708	632767	658399	791866	331639	386253	550184
5-guanidino-3-methyl-2-oxo-pentanoate	13.4423	187.096	0	0	0	0	0	0	0	0
5-hydroxy-2,4-dioxopentanoate	7.23546	146.022	481155	765331	614892	640428	658966	507932	648106	672343
5-Hydroxyconiferaldehyde	6.3843	194.058	303991	628986	688606	483324	552757	750705	747969	381522
5-Hydroxyferulate	7.25376	210.053	2.93336e+06	3.28939e+06	3.13634e+06	3.22126e+06	3.31956e+06	2.86759e+06	2.78468e+06	3.37363e+06
5-Hydroxyindolepyruvate	4.65954	219.053	0	0	0	0	0	0	0	0
5-Hydroxymethyl-2-furaldehyde	4.39447	126.032	257729	313704	222092	261782	199911	215251	216728	271346
5-Hydroxypentanoate	7.26023	118.063	1.30055e+06	1.98237e+06	1.33873e+06	1.55226e+06	1610096	1334674	1.34412e+06	1.9878e+06
5-Hydroxytryptophan	9.9649	220.085	614014	475650	639879	441289	454571	318422	339882	389839
5-Hydroxytryptophol	11.1361	177.079	232691	193162	254245	198632	172882	127111	146431	181348
5-L-Glutamyl-taurine	15.7599	254.057	141348	176878	135329	134407	143274	67549.2	92405.5	98937.9
5-Methyl-2-furaldehyde	4.05509	110.037	886041	622094	751088	502633	732021	769042	698066	764995
5-Nitro-2-furfuryl methyl ether	9.64039	157.038	298884	296815	273856	314733	342634	356227	310314	289952
5-Oxo-1,2-campholide	5.70492	182.094	1.52954e+06	1.74227e+06	2.20794e+06	2.12752e+06	1423921	1.64835e+06	1.6948e+06	2.40547e+06
5-Oxoproline	10.3184	129.043	29688364	17931758	32474850	24696462	26702448	28738666	24094282	21102892
5-Phenyl-1,3-oxazinane-2,4-dione	4.58422	191.058	877462	1.14747e+06	1.13401e+06	1.17267e+06	1.45441e+06	1.50396e+06	1261544	1.1555e+06
5S-HETE di-endoperoxide	3.94811	402.225	1.87963e+06	1.09001e+06	1.48743e+06	990132	1.01199e+06	1.23239e+06	1.93072e+06	1.30057e+06
6-Acetamido-2-oxohexanoate	6.02823	187.084	998980	2103934	1.85391e+06	1.34477e+06	1458067	2.54102e+06	2.26274e+06	1.04779e+06
6alpha-Hydroxy-castasterone	3.57083	466.367	89918.7	17028.1	34271.9	34919.2	38424.2	23506.2	56742.4	23928
6-Amino-2-oxohexanoate	8.90852	145.074	363266	246381	271174	248893	327330	284167	236442	279138
6-Butyryl-5,7-dihydroxy-8-(3',3'-dimethylallyl)-4-phenylcoumarin	3.94013	392.162	653678	458523	553272	349018	541046	365899	694995	484020
6-formyl-H2-pterin	8.52711	191.045	3.21894e+06	1302411	2741017	2.47384e+06	2174883	2.23897e+06	3127162	2.25601e+06
6-isobutyl-4-hydroxy-2-pyrone	7.20628	168.079	1038405	822711	1.03981e+06	1125737	1.1888e+06	915608	943711	1.3388e+06
6-oxo-1,4,5,6-tetrahydronicotinate	7.22549	141.043	600342	604012	582275	690536	479879	769425	292018	504576
6-Phospho-D-gluconate	18.1795	276.025	0	206502	212779	204482	198495	179785	20833	199256
7,8-Dihydromethanopterin	3.62679	774.247	0	0	0	0	0	0	0	0
7,8-diketopelargonate	4.76919	186.089	2.90683e+06	3.17664e+06	3029886	3.0564e+06	2903768	2.99478e+06	2.63597e+06	3626316
7-Ethoxycoumarin	9.85529	190.063	2.29409e+06	1.06449e+06	1.3681e+06	1548672	950472	756207	519099	802245
7-Hydroxy-3-(4-methoxyphenyl)-4-propyl-2H-1-benzopyran-2-one	8.51593	310.12	179172	90812.3	174456	149822	185605	97813.1	157967	176418
7-Methyl-2-hydroxy-6-oxoocta-2,4-dienoate	4.8181	184.074	6423202	6477018	6.94981e+06	6.17433e+06	6.55299e+06	6502718	6.1726e+06	6463766
7-Methylguanine	12.2867	165.065	363283	254797	388614	201312	391139	161853	451191	237084
7-methylsulfinylheptyl glucosinolate	14.1597	479.095	303680	500238	518774	562969	534672	546405	305924	644045
7-oxoheptanoate	4.78057	144.079	724278	847996	824268	941457	772256	902986	681124	798215
8-Amino-7-oxononanoate	7.2629	187.121	10849536	11472697	10632492	11348483	12941451	10529463	9431813	11718633
8-Epiiridodial glucoside	4.55544	330.168	3.04267e+06	3.26378e+06	3.29542e+06	3.08952e+06	2974111	3.03026e+06	2765622	3.22495e+06
8-Epiiridotrial glucoside	4.52571	344.147	726265	764182	793284	700149	704180	725457	765396	729357
8-Methoxykynurenate	7.22528	219.053	126532	0	354665	277106	238149	151544	130712	317189
8-Oxocoformycin	8.05737	282.096	1493473	889543	1.47676e+06	1.07843e+06	1.49604e+06	722317	868342	1.34617e+06
9-Oxononanoic acid	3.71835	172.11	161191	193492	247656	211948	210997	180741	175290	256803
9S,15S-dihydroxy-11R,18-diacetoxy-5Z,13E-prostadienoic acid	3.95155	454.257	570026	408764	668403	411424	557200	496758	720839	487930
a Cysteine adduct	7.19766	191.025	4.93584e+06	3.13987e+06	4.08722e+06	2.40028e+06	7510210	3.15015e+06	4.10328e+06	3.13307e+06
Acetoacetate	7.29658	102.032	493431	514555	441406	465058	682744	634671	530190	722097
Acetyl-CoA	12.2362	809.126	578758	1.4129e+06	735862	685218	1.30575e+06	355419	1.08013e+06	568696
Acetylcysteine	8.09621	163.03	1290983	127279	768118	780147	426161	288775	298501	454908
Acetylglycine	9.7842	117.043	163911	120748	172988	159503	160611	93175.4	119708	140609
Acetylpseudotropine	6.3352	183.126	125021	158823	167498	154533	206324	261383	322154	129118
Adenine	9.1178	135.055	635159	742190	1.38642e+06	1.50072e+06	1.31726e+06	764756	336935	922105
Adenosine	8.54346	267.097	11484964	23271832	34710892	34818172	44008800	18034512	7055475	30948944
ADP	15.1377	427.029	1.23775e+06	3.59979e+06	1149787	727439	3.55317e+06	598710	3169650	927891
Ala-Ala-Ala	10.9957	231.122	0	0	0	0	0	0	0	0
Ala-Ala-Ala-Asp	14.2853	346.149	493525	963416	0	0	1.36773e+06	284930	2.1566e+06	170649
Ala-Ala-Ala-Ser	11.5664	318.154	479665	1.32185e+06	833060	575803	1.16802e+06	475112	787993	744596
Ala-Ala-Asn-Gly	14.8559	331.149	0	0	0	0	0	0	0	0
Ala-Asn-Ser	16.7015	290.123	231498	377864	1.04904e+06	469355	490546	217862	565084	615578
Ala-Asp-Cys	15.4792	307.084	1.59067e+06	2452935	1.55524e+06	1.51989e+06	2.53475e+06	915111	1.02646e+06	1428931
Ala-Asp-Gly	15.9331	261.096	294244	173624	242889	65313.3	339219	115776	285314	182316
Ala-Cys-Ser-Ser	11.8603	366.121	358891	386686	406957	419035	343461	262662	247236	229375
Ala-Gly-Pro	10.2114	243.122	288066	250990	229926	233476	414097	336392	307604	252294
Ala-Leu-Met-Ser	8.82268	420.204	651048	523935	572510	507521	854958	768457	553010	543074
Ala-Lys-Trp-Val	27.3797	502.291	95505.6	72353.3	68705.8	69649.6	111210	86423	65163.4	61841.9
Ala-Met-Val-Pro	8.28273	416.209	88822.8	75193.2	102448	94675.9	72510.8	78976.3	82118.8	77699.1
Alatanin 2	4.81131	831.234	0	21740.9	27346.4	0	0	0	0	0
Ala-Thr-Ala-Ala	12.4354	332.17	0	93709.5	0	0	0	0	150198	0
Aldicarb	9.61716	190.078	0	0	0	0	0	0	0	0
Alliin	8.26051	177.046	3.32092e+06	584974	2.47794e+06	1.41288e+06	1805622	1.4792e+06	2.04671e+06	1.11794e+06
allopurinol	7.84011	136.039	819300	576727	678834	489874	758224	338385	476587	568150
allylcysteine	6.37126	161.051	150019	35328.6	258741	121783	104605	156832	267836	46229.3
Allylisothiocyanate	7.5499	99.0141	0	0	0	0	0	0	0	0
alpha-Irone	3.92685	206.167	913092	1.16224e+06	1.08842e+06	994894	941508	878429	1.26128e+06	976199
alpha-Methylstyrene	3.97993	118.078	641819	413910	621920	401458	432424	443766	647202	597034
AMCC	9.77979	220.052	3.68785e+06	1.86643e+06	3.50505e+06	2.93997e+06	3.4471e+06	3.19203e+06	3.69613e+06	3.34126e+06
Aminoimidazole ribotide	16.3836	295.057	459564	238501	251185	233426	565949	167986	335236	369762
Ammodendrine	9.7221	208.157	246236	255905	289847	246036	252364	214591	222105	216630
AMP	13.6506	347.063	537396	3551827	1.97451e+06	1.80045e+06	4.17042e+06	834998	901598	2215071
Anthenoside A	3.62513	679.468	6590072	7.02088e+06	7040297	6991674	8.00944e+06	6911676	6.5441e+06	7227677
Anthranilate	11.2643	137.048	747846	717803	899730	304546	607124	317667	584804	451189
Apiole	4.0984	222.089	408778	452024	374300	382262	434831	449441	443681	387846
Arbutin	7.18979	272.089	477750	620725	537296	557347	392986	352008	336879	431587
Arecoline	7.05189	155.095	142292	155183	134076	131634	152414	139679	163166	156477
Arg-Leu-Lys-Thr	28.1337	516.339	1.1325e+06	1.27522e+06	1.28365e+06	1.2327e+06	772764	1.27545e+06	1.24455e+06	1242776
Ascorbate	14.7906	176.032	0	853445	0	0	664862	0	376348	0
Asn-Asn-Cys-Pro	17.0494	446.158	0	0	0	0	0	0	0	0
Asn-Leu-Asn-Tyr	16.1743	522.243	0	47980.2	0	0	121360	124329	132144	0
Asn-Lys-Lys-Lys	16.5147	516.338	88419.6	0	0	89564.9	0	108576	0	0
Asn-Lys-Phe-Asp	15.6649	522.243	0	0	0	0	67380	0	48400	0
Asn-Met-Gln-Pro	8.62638	488.205	1.26602e+06	2495683	3.53334e+06	3.78334e+06	4635596	1.75511e+06	920853	3.29169e+06
Asn-Val-Asn-Ser	8.74248	432.196	1.77243e+06	1883934	1.60243e+06	1.75779e+06	1.8888e+06	1.90624e+06	1.62413e+06	1909324
Asp-Arg	17.8594	289.138	87465	101379	92792.3	41044	69882.6	38244.8	58221.5	76282.4
Aspartyl-L-proline	15.6446	230.09	523424	475515	442814	270766	526042	211813	350788	362824
Asp-Asp-Gly-His	12.7562	442.144	0	248236	0	0	247933	0	292065	0
Asp-Cys	15.3257	236.047	95791.6	239914	101372	0	569553	0	290996	0
Asp-Cys-Cys-Ser	17.0226	426.088	1.03788e+06	598902	1.07886e+06	348562	2.39794e+06	523583	4889670	297356
Asp-Cys-Gln-Tyr	10.6349	527.169	118513	0	144099	83883	65607.5	52582.1	101741	96981.5
Asp-Leu-Met-Pro	10.3075	237.107	0	0	0	0	1.4235e+06	880633	870337	977255
Asp-Met-Asp-Gly	16.0764	436.126	8787850	2.00659e+06	7954006	4.06646e+06	3.2214e+06	1.62711e+06	2.48868e+06	3.65325e+06
Asp-Met-Met-Pro	8.52318	492.172	215519	131504	214868	193718	168649	84800.2	119193	176049
Asp-Phe-Gly-Gly	14.8213	394.149	0	0	0	0	0	0	0	0
Asp-Thr-Cys-Cys	16.5802	440.103	0	31707.5	0	0	50186.7	69471.1	34048	0
Asp-Thr-Cys-Tyr	12.516	500.157	0	269938	0	0	177581	0	414037	0
ATP	16.5998	506.996	46782592	51329760	51721192	48048580	43841552	28031888	45797872	42221884
Axillarenic acid	3.59765	398.339	276990	289859	147310	214307	197621	168487	188546	170751
Azelaic acid	11.0425	188.105	163720	262080	235984	204229	254195	227244	240730	224010
bacimethrin	7.06935	155.07	54103.9	59888.2	50724.4	68681.7	50826.5	71766.7	61235.4	57007.4
Bakkenolide A	3.9029	234.162	518487	454287	474492	418020	591330	459430	378250	574934
Bendiocarb	4.56478	223.084	300180	321547	335077	388577	540222	693942	539102	436725
Benzene-1,2,4-triol	5.28497	126.032	390309	357303	322345	307835	300195	326158	295762	330930
Benzyl 2-methyl-3-oxobutanoate	4.75288	206.094	442474	368852	313272	347107	343801	290447	331433	378596
Berberastine	8.40626	351.11	111163	62977	85236.5	85863.4	73582.2	55970.7	89695.5	74527.3
beta-Citryl-L-glutamic acid	20.5972	321.07	7358736	12790036	10393876	4543161	12523793	1.7276e+06	9966038	6118806
beta-Cymaropyranose	7.25345	162.089	536683	646363	584992	529377	631783	436345	512228	715485
beta-D-Digitalopyranose	8.86247	178.084	118992	150156	132398	138962	158647	145186	136474	134893
Betaine	10.8651	117.079	15552669	10346401	12649353	13519765	15572468	11030163	10493406	12407765
Bicine	10.9962	163.084	104024	117683	74886.1	68756.4	92317.7	144969	117476	100125
Bicozamycin	11.0113	302.112	207719	350943	259231	210317	319136	175300	217425	255364
Biotin	8.64134	244.088	661912	339088	473636	472259	447034	453527	347167	418626
Biotinsulfone	12.6825	276.078	236797	216481	224700	157014	365127	201480	490925	174704
Bis(2-ethylhexyl)phthalate	7.05129	390.277	27781104	20736812	19435322	18576736	28039246	20360702	18235906	17563258
Bisnorbiotin	7.21237	216.057	11640834	1.09298e+06	5.92569e+06	3.65528e+06	4.56531e+06	3.18327e+06	7701251	2.87044e+06
Boc-Asn	7.49119	232.106	75424	400802	144452	261582	129720	223520	92506.3	201613
Botrydial	3.92382	310.178	2.74194e+06	1.71429e+06	1.82929e+06	1.52098e+06	1.6335e+06	1.62662e+06	2.13582e+06	1.51642e+06
Butanoic acid	6.50882	88.0524	101136	100660	106420	101593	137795	113797	188046	100333
Butenylcarnitine	4.67235	229.132	2679614	2.54194e+06	2.60548e+06	2758166	2.4868e+06	2.54081e+06	2.43688e+06	2.61362e+06
butyrylcholine	7.25769	173.142	2.32158e+06	3913656	1.43467e+06	2172756	3.1615e+06	4.92515e+06	1.25112e+06	1.43416e+06
Caproylcholine	7.48699	201.173	270963	187466	265874	235685	279532	174706	197994	250459
Capryloylglycine	7.26145	201.137	306607	318617	354029	307064	338079	314908	393324	311618
CAPS	8.7403	221.108	255868576	274719584	236468800	259121680	265518336	235934624	238606496	255908160
Carbamoyl phosphate	19.079	140.983	372700	88582.3	223150	385638	99542.8	387992	144029	373358
carbidopa	8.08864	226.095	348666	195795	290157	267497	283804	178296	139780	270760
Carnosine	15.3208	226.107	99925.9	321717	0	0	327572	0	208142	49160.3
Carpacin	4.27213	192.079	610006	442902	415908	383958	480559	437059	478828	412051
Casein K	12.2317	130.074	0	0	0	0	0	0	0	0
CCCP	7.20872	204.02	1.81365e+06	460242	1.00623e+06	1.14247e+06	659077	987732	1.31688e+06	782820
CDP	17.2969	403.018	246648	816324	523825	231406	960024	195714	949274	317093
CDP-choline	15.1071	244.054	3218637	16322945	2.65347e+06	1.19382e+06	19080998	815108	8511410	2.11382e+06
CDP-ethanolamine	16.2422	446.061	5443285	4.88142e+06	4970122	4.73713e+06	4717040	2878604	3.75668e+06	5.10307e+06
CDP-ribitol	16.8592	537.076	43440.6	112114	96034.8	84728.4	129110	29726.1	92935	96465.2
Cerulenin	4.92124	223.121	108353	125614	94078.5	105232	99168.4	90868.8	87206	90143.6
CHAPS	7.10648	614.396	1.58362e+06	3390347	2.54648e+06	2.65249e+06	4.00875e+06	1.88818e+06	1.94464e+06	2.57357e+06
Chelilutine	11.3892	377.126	795210	6.22581e+06	1.80781e+06	1.13777e+06	4.28196e+06	1.13152e+06	2487999	1.74191e+06
Chloroacetic acid	8.60618	93.9821	126962	171870	115322	133168	118801	136883	122543	146991
chlorosuccinate	17.1552	151.988	224175	546717	353392	236220	509873	245574	412456	384577
Choline	20.437	103.1	578537	536252	508072	535933	530031	432111	1.10675e+06	483271
Choline phosphate	14.5584	183.066	890185600	1525591808	959180480	804424768	1791474688	673169536	1485243264	846962624
cis-1,2-Dihydro-3-ethylcatechol	5.5611	140.084	567394	609078	595703	336534	587626	660133	586354	820455
cis-1,2-Dihydroxy-1,2-dihydrodibenzothiophene	4.38301	218.04	136929	88787	0	111053	185274	91083.9	99902	74840.2
cis-3-(Carboxy-ethyl)-3,5-cyclo-hexadiene-1,2-diol	7.22425	184.074	7717021	7251613	6813681	5.41076e+06	6.18181e+06	6.81709e+06	5.68937e+06	6.83459e+06
cis-4-Octenedioicacid	11.66	172.074	154077	323319	245471	170424	398544	162600	263950	197161
cis-Acetylacrylate	7.27144	114.032	342808	518176	422402	486570	448379	410980	379142	446139
cis-Aconitate	18.7687	174.016	1.79424e+06	3.33962e+06	3.81533e+06	1.4895e+06	5348881	853642	3.53408e+06	2.11389e+06
Citrate	18.8817	192.027	13945530	44657128	27506958	14242984	51946396	8.36386e+06	32993354	18605510
CMP	16.2516	323.052	294971	287270	258864	241554	418266	170664	264657	298316
CMP-2-aminoethylphosphonate	15.1112	430.066	0	226480	0	0	249869	0	198019	0
CMP-N-trimethyl-2-aminoethylphosphonate	14.0493	472.113	0	141858	0	0	127452	0	103306	0
CoA-glutathione	17.3393	536.092	331909	353011	390412	251800	394396	244780	346712	312696
Coniferyl alcohol	4.28181	180.079	1.19469e+06	1.12813e+06	1.01878e+06	904670	993289	1.02231e+06	912560	1.08578e+06
Convicine	19.1303	305.086	89481.8	80464.6	55028.4	52120.4	84553.2	28660.9	69024.2	33495.6
Creatine	14.3587	131.069	482493824	459756576	467205824	425410016	644357504	281260736	407635680	452826528
Creatinine	9.37479	113.059	12445708	7530991	10667885	9695456	11903046	9108237	7688930	10016736
CTP	18.651	482.985	2153626	2.11257e+06	2.66245e+06	2437232	2.175e+06	1.58661e+06	2268644	1.9409e+06
Cumene	4.13583	120.094	1.45989e+06	1.22146e+06	1.49038e+06	1.16736e+06	1.25894e+06	1358397	1.46669e+06	1.50557e+06
Cycasin	11.4967	252.096	101720	0	163077	69478.7	95057.2	241337	114170	140033
Cyclic ADP-ribose	16.6199	541.061	354344	524452	419842	294861	527212	182782	421986	288984
Cyclohex-2-enone	4.08343	96.0574	3169254	2.03339e+06	2836141	1.82436e+06	2.2679e+06	2.51225e+06	2.64712e+06	2286577
Cyclohexane-1,3-dione	4.82991	112.052	1.74099e+06	1.75455e+06	1658391	1.69495e+06	1.6241e+06	1.54178e+06	1.74121e+06	1.42689e+06
Cyclohexane-1-carboxylate	5.84707	128.084	939834	947540	641121	737188	255138	624697	201896	1.04207e+06
Cyclohexanone	4.08958	98.073	1.21504e+06	661408	925620	601827	615687	736481	1.29884e+06	724995
Cys-Cys-Pro-Ser	11.1215	408.114	103818	231059	229800	121040	412479	116711	485165	156904
Cys-Gly	14.4233	178.041	0	0	0	0	0	0	35972.2	0
Cys-His	13.4298	258.079	0	0	0	0	138993	0	178515	0
Cys-Pro-Pro	16.3553	315.126	0	0	0	0	74863.6	0	60594.8	0
Cytidine 2'-phosphate	17.3077	323.052	104644	67248	90044	117864	74752.4	70274.7	90855.4	113926
D-2-Hydroxyisocaproate	6.27229	132.079	108836	169852	173458	105839	102071	182928	200336	87053.3
dADP	15.5901	411.035	238993	111984	218135	244543	125015	105833	132556	170322
Dalpalatin	4.8137	358.069	694602	878452	851973	999941	948023	951367	762341	912228
Danielone	7.18306	212.068	2.02576e+06	2.02817e+06	1.76795e+06	1519061	1.71471e+06	1743590	1.26934e+06	1.79871e+06
D-Apiitol	10.0206	136.074	121161	90905.6	94453.2	91684.8	114651	92261.7	106163	115929
dATP	15.5902	491.001	838727	833809	761275	582529	930115	443005	845296	655977
D-Cysteine	11.8305	121.02	121405	73967.5	122482	76934.7	157689	88805.6	236097	64041.6
decanamide	4.30893	171.162	251556	368915	369326	403899	496288	225858	375255	294110
Decanoic acid	3.93276	172.146	2435845	2.33359e+06	2.36788e+06	2.41301e+06	2.46199e+06	2491351	2.85754e+06	2503827
dehydrolysine	27.4742	144.09	87968.3	62282.4	61691.4	75121.7	104946	97114.4	113237	80360.4
Dehydrophytosphingosine	3.78575	315.277	464998	365844	326756	257965	334239	386211	215488	286284
delta1-Piperideine-2-carboxylate	7.48207	127.063	21051440	20735180	15304294	25137506	16627210	24138994	11979628	14935020
Deoxycytidine	9.83294	227.091	1.04897e+06	602015	550240	694759	721191	388517	345600	568506
D-Erythrose	10.4695	120.042	243079	224263	255962	220988	218952	204396	238805	241326
Dethiobiotin	9.44019	214.132	166089	114142	116599	145812	117139	78637.6	125304	155608
D-Fructose	17.1509	180.063	12968697	6.37622e+06	17029560	11483360	8463705	8.11903e+06	8187944	11636189
D-Fructose 1,6-bisphosphate	18.524	339.996	263789	179634	397849	356116	78061	168677	159242	195130
D-Fructose 6-phosphate	16.2018	260.03	1.01397e+06	703600	1.07613e+06	938909	1.12683e+06	660823	1.03385e+06	1.16961e+06
dGDP	16.5774	427.029	6911081	5.5086e+06	7138446	6763449	4.93252e+06	3.95885e+06	5017254	5.7798e+06
D-Glucarate	17.6172	210.038	0	367804	38902.2	0	158672	0	254133	0
D-Gluconic acid	14.4872	196.058	583528	1.8164e+06	204631	451860	1.07729e+06	0	577353	237150
D-Glucono-1,5-lactone	15.8809	178.048	51985.7	113390	76437.4	33296.5	104301	49752.2	85747.3	63599.3
D-Glucose	14.6376	180.063	1.2452e+06	469089	1.47876e+06	1.0954e+06	929882	1.83938e+06	911200	1.29707e+06
D-Glucose 6-phosphate	17.0415	260.03	1.04697e+06	2.14803e+06	2.06912e+06	1276554	3.05584e+06	1.12799e+06	2.69601e+06	1.79107e+06
D-Glyceraldehyde 3-phosphate	16.469	169.998	3.93658e+06	6278475	6.96181e+06	4.35311e+06	6.29573e+06	1.81462e+06	5.27831e+06	3849774
dGMP	15.0911	347.063	227237	621793	202736	136542	443848	0	339197	0
DHAP(10:0)	4.22371	324.134	755889	617839	625371	633209	513040	533258	573879	663940
Di(2-ethylhexyl) adipate	3.70594	370.309	677234	492968	581624	389143	364808	455572	466615	478965
Diacetyl	7.54251	86.0367	813288	851160	884258	771032	737134	800082	736856	872992
Diacetylmonoxime	7.17126	101.048	149687	240896	145367	148285	241044	199770	226799	179718
Dibutyl adipate	7.23611	258.183	1.23272e+06	1.50387e+06	1.34359e+06	1.30341e+06	1.12213e+06	1.13874e+06	838356	1.25023e+06
Diethyl (2R,3R)-2-methyl-3-hydroxysuccinate	6.21125	204.1	95540.8	396827	397060	292509	93438.4	447493	392307	190280
Diethyl 2-methyl-3-oxosuccinate	7.24824	202.084	1.0312e+06	1.02421e+06	993962	1.01502e+06	997442	1.09365e+06	953954	1.12052e+06
Diethyl sulfide	9.57754	90.0502	369604	279554	342045	377049	287409	196327	237936	284309
Dihydro-3-hydroxy-3-(1-hydroxyethyl)-4-methylfuran-2(3H)-one	5.00995	160.074	812166	894973	949372	877722	839132	797538	767526	918683
Dihydro-4,4-dimethyl-2,3-Furandione	3.93982	128.047	558413	468441	591356	480509	513691	532624	461241	522437
Dihydroclavaminic acid	12.3969	200.08	0	13179.7	0	0	6873.31	0	12270.6	0
dihydrophaseic acid 4-O-beta-D-glucoside	4.76737	444.199	302553	260165	273843	276028	290868	344955	262707	278691
Dihydrophloroglucinol	14.0424	128.047	220527	253166	408772	290544	212820	253828	144654	540383
dihydrothymidine	15.2805	244.106	290090	421233	228452	189968	371272	86228.4	346532	173027
Diisobutyl adipate	6.47536	258.183	91710.1	359513	326536	305232	238727	386362	503879	138601
Diisononyl phthalate	3.69005	418.308	262515	261402	304060	173424	325321	236009	171934	844092
Diisopropyl phosphate	4.10536	182.071	0	104113	0	100786	160037	115634	0	143675
Dillapiole	7.09695	222.089	212616	249123	226435	253329	235120	222432	262311	217512
Dimethyl adipate	5.75122	174.089	456306	399022	342046	467370	494960	305981	306008	443290
Dinor-PGE2	3.97719	324.194	2.00013e+06	764617	1.30227e+06	855033	1.01762e+06	974986	1.84157e+06	992671
DL-Methionine sulfone	9.26094	181.041	0	67212	0	0	126525	0	89264.4	0
DL-β-hydroxynorvaline	16.0503	133.074	281462	139433	248707	295459	189763	172796	166295	152097
D-Mannonate	14.0522	196.058	816046	1.04972e+06	582216	527255	466344	260980	393553	441878
D-Mannose	13.6132	180.063	1.15474e+06	1.13293e+06	823685	1.0954e+06	1333770	980718	1.46513e+06	890110
D-myo-Inositol 1,2-cyclic phosphate	16.3531	242.019	29648.8	0	58030.4	59132.4	0	67524.3	0	61063.3
Dodecanedioic acid	4.49361	230.152	115222	107399	100379	105457	96672.9	112146	124509	162886
Dodecanoic acid	3.80478	200.178	10627769	18196926	13666160	13015352	14388043	13120804	19308950	13145707
Dolichodial	6.35569	166.099	356528	447298	371194	313982	406282	401371	511770	284688
Dopaminequinone	7.40969	151.063	5052654	4.76999e+06	4288237	4.31187e+06	4.67401e+06	3.84023e+06	3.99368e+06	4.77564e+06
D-Ribose	14.8085	150.053	0	47493.5	0	0	0	0	63143.3	0
D-Ribose 5-phosphate	15.8925	230.019	308093	169581	181178	189280	141170	115146	343526	106905
D-Sedoheptulose 7-phosphate	16.4457	290.04	1.49965e+06	1.19018e+06	1.46067e+06	1.54797e+06	1.30561e+06	1.11449e+06	1.24988e+06	1.17089e+06
D-Sorbitol	13.7682	182.079	2.07629e+06	1722196	1871988	1.9499e+06	1.73215e+06	1.94108e+06	1.71344e+06	1.74324e+06
dTDP-3-oxo-4,6-dideoxy-alpha-D-glucose	13.4191	530.07	312989	170629	584002	251411	247874	0	118216	203944
D-Thevetose	7.91445	178.084	48309.4	74073.9	62158.5	71308.9	76661.2	73554.4	89819.1	79600.9
dTTP	16.1467	481.99	1.33819e+06	1.45836e+06	1.6057e+06	1.44196e+06	1.53591e+06	969924	1.56448e+06	1.33745e+06
D-Xylonate	13.5593	166.048	2.42516e+06	3.72985e+06	2.7225e+06	2.05902e+06	3.31089e+06	1.29523e+06	2529110	1.78813e+06
D-Xylonolactone	15.6327	148.037	9746530	15004436	9869084	6.49046e+06	17416302	3.79414e+06	10504912	6.24364e+06
D-Xylulose	13.22	150.053	0	199845	148096	0	232038	0	171473	0
Epothilone A	3.84427	493.25	1.83986e+06	1419024	1.52356e+06	1.33718e+06	1.50591e+06	1.51936e+06	2.06407e+06	1.51795e+06
epsilon-Caprolactam	6.82283	113.084	282586	1.00304e+06	386493	282625	970843	609349	707411	775550
E-pyridine-3-aldoxime	5.85772	122.048	4.04634e+06	2063271	3481223	3.2922e+06	3.89627e+06	2.71763e+06	3.68891e+06	3.06031e+06
Eruberin A	3.9152	458.194	0	0	0	0	0	0	0	0
Erythritol	11.6662	122.058	69379.5	57555.6	73691.2	59269.3	73047.1	77156.4	76154.2	75128.9
ethanesulfonate	6.60138	110.004	193049	207002	192132	216706	219796	194378	203461	217950
Ethanolamine phosphate	15.6716	141.019	22146176	23172430	25050444	18296636	26302184	10540781	19681996	17955882
Ethyl 3-oxohexanoate	6.19137	158.094	239681	223054	243362	178689	191187	258052	249761	289266
Ethyl isovalerate	7.04913	130.099	66270.6	62690.4	59815	62956.7	57383	59728.5	64919.7	66250.4
Ethyladipicacid	12.1575	174.089	0	200425	97745.3	31183.7	200575	53622.2	168815	62503.3
Ethylmethylaceticacid	4.78712	102.068	118398	194458	177756	170755	137541	152431	192393	132751
Ethylphosphate	9.55658	126.008	310094	258290	368933	386023	313327	201870	198145	267535
Eugenol methyl ether	4.09887	178.099	2.1974e+06	1.84818e+06	1.78912e+06	1346128	1.70799e+06	1.65652e+06	1.83923e+06	1.66595e+06
FA (12:1) Decenedioic acid	4.77006	200.105	939786	1.29829e+06	1429853	987826	1.24482e+06	1.69733e+06	1.44897e+06	877011
FA (12:1) dodecenoic acid	4.04815	198.162	105272	139062	111642	210481	269177	199189	89198.8	170248
FA (13:1) tridecenoic acid	3.81962	212.177	137039	261480	132359	200505	230673	226455	319511	310604
FA (13:2) tridecadienoic acid	3.82329	210.162	316255	223162	211266	203705	196120	207421	234024	206755
FA (14:2) tetradecadienal	3.97327	208.183	0	0	0	0	0	0	0	0
FA (16:2)	3.78776	252.209	0	219204	232329	207627	287081	243626	114934	258661
FA (17:0)	3.67794	270.256	1.31695e+06	2.41462e+06	1.65476e+06	1.37854e+06	1.69483e+06	1862582	1.80796e+06	1.66506e+06
FA (20:0)	3.63515	312.303	934523	2.02728e+06	1.33811e+06	1.22925e+06	1.46493e+06	1.34241e+06	1.544e+06	1.51467e+06
FA (22:0)	3.85964	314.319	563035	597992	499303	548352	585457	481884	576251	645774
FA (3:0) chloro-propanoic acid	7.30047	107.998	110386	136419	106755	164915	98494.8	110690	90331.4	116217
FA (6:1)	4.33226	114.068	3.26065e+06	2516595	2842076	2.40344e+06	2.48998e+06	2.6332e+06	2.68029e+06	2.63504e+06
FA (7:1) heptenal	4.85724	112.089	54227.7	127845	115173	59970	122207	97410.3	110790	100244
FA (8:0) octanoic acid	4.21438	144.115	4.17696e+06	4470485	4.17153e+06	3.99583e+06	4.50537e+06	4.18506e+06	4273343	3994158
FA (8:1)	4.64315	142.099	539351	596930	570310	668869	498859	573983	561506	575426
FA (8:2)	4.53223	140.084	2.38351e+06	1865669	1.89331e+06	1.78668e+06	1.94302e+06	1.9126e+06	1.86263e+06	2.01059e+06
FA (9:1) nonynoic acid	6.20542	154.099	201079	203221	256441	249034	180089	215109	165524	291429
FA (9:2) nonadienoic acid	4.28915	154.099	2.34297e+06	1.32005e+06	1.74605e+06	1.0972e+06	1.58246e+06	1402498	1.58457e+06	1.42119e+06
FA dimethyl(14:0)	7.08403	254.225	103500	95805.7	101424	94874	83948.8	77968.9	93854.6	91419.1
FA dioxo(10:0)	4.40867	200.105	1.16867e+06	1.10835e+06	652048	1.07662e+06	1.11236e+06	1.05894e+06	701301	1.33104e+06
FA hydroxy(10:0)	4.62861	188.141	289073	288172	316069	322362	292783	356202	277416	306237
FA hydroxy(12:0) dodecanoic acid	4.27074	216.173	288455	331132	359064	346419	365819	325847	353668	371519
FA hydroxy(13:0) tridecanoic acid	4.07503	230.188	262564	211447	254013	215286	202991	226520	220300	210008
FA hydroxy(15:0)	3.86351	258.219	340279	278268	228808	207955	257792	238835	255258	233096
FA hydroxy(16:0)] hexadecanoic acid	3.81119	272.235	943895	1.00889e+06	986042	795357	1055286	796258	899124	1.08909e+06
FA hydroxy(18:0)	3.73914	300.267	1.03775e+06	1.09459e+06	1.2646e+06	565971	963676	796325	926857	754750
FA hydroxy(24:0)	3.61547	382.345	320759	162710	124009	125886	213438	142675	258177	143918
FA hydroxy(6:0)	4.80975	132.079	167931	157891	193109	175666	166347	168533	184890	224107
FA hydroxy(7:0)	4.75244	146.094	754241	808360	789622	729284	693195	704072	713125	785754
FA hydroxy(9:0) hydroxy-nonanoic acid	4.34923	174.126	330655	434388	347348	350909	347332	218613	384832	305258
FA methyl (7:1)	6.04838	142.099	100490	160770	157785	157996	116394	130918	112389	193533
FA methyl(12:0) dodecanoic acid	3.7819	214.193	886454	890310	819328	641758	817989	840258	802879	908771
FA methyl(14:0)	3.71857	242.225	1.49295e+06	2.17594e+06	1.53869e+06	1.33956e+06	1.76716e+06	1.81605e+06	1.72953e+06	1.49015e+06
FA methyl(14:0) dodecanedioic acid	4.8208	244.167	499434	601021	471164	504494	571308	576222	529990	684330
FA methyl(15:0) tridecanedioic acid	4.09451	258.183	296725	255567	255305	216337	256488	229205	347751	237454
FA methyl(16:0)] tetradecanedioic acid	7.23556	272.199	442624	502409	490953	479338	423629	512827	480456	619947
FA methyl(18:0)	3.65882	298.287	248032	351322	188875	208693	232248	294373	300584	318371
FA methyl(5:1)	5.75362	114.068	740486	714257	805992	699763	748633	565415	679042	832460
FA methyl(6:0)	4.46745	130.099	1.82092e+06	1.81212e+06	1.87471e+06	1.70068e+06	1.66174e+06	1.97426e+06	1.9416e+06	1.82313e+06
FA methyl(8:0)	4.0285	158.131	13399828	14918942	14855465	13638868	15067934	14897514	15583037	15536339
FA oxo(10:0)	4.5186	186.126	871336	957266	999152	856711	850105	784268	800755	945797
FA oxo(12:1)	3.96996	212.141	779018	690747	682688	539677	628264	606015	681112	601466
FA oxo(16:0)	3.75826	270.219	1.67244e+06	1.74391e+06	1.68259e+06	1.15929e+06	1.56638e+06	1.63018e+06	1947183	1.73613e+06
FA oxo(18:0)	3.72099	298.251	2.37727e+06	2.00816e+06	2.02625e+06	1.21099e+06	1.74275e+06	1.77051e+06	2.25901e+06	1.86689e+06
FA oxo(21:0)	3.67845	340.298	743155	333870	454041	251564	306307	315267	699855	377626
FA oxo(22:0)	3.61574	354.314	370329	171000	119691	92352.8	152465	142452	220063	191395
FA oxo(7:0)	7.28981	144.079	5704654	5870806	5537398	5.11015e+06	4970365	4.69248e+06	5.13024e+06	5941968
FA oxo(8:0) oxo-octanoic acid	8.33523	158.094	434100	473363	471646	378716	470123	530801	445308	583070
FA(16:1)	3.70337	254.225	1.50017e+06	1.49273e+06	1.05434e+06	1.03497e+06	984705	947943	1.26888e+06	985296
FAD	11.3188	785.158	642046	1.28461e+06	1.19293e+06	686021	1.41689e+06	466217	1.0256e+06	690854
Fasoracetam	8.62014	196.121	0	0	0	0	0	0	0	0
Ferulate	7.04198	194.058	191808	146709	160219	378042	167072	160269	171044	167100
Flavanone	7.07676	224.084	1.53586e+06	1.09809e+06	1.06652e+06	1.00854e+06	1.44047e+06	1.11506e+06	1.037e+06	987423
FMN	11.2169	456.105	112961	58800.3	87619.5	46962.3	58064.4	34692	121210	44258.9
Folate	17.1231	441.14	114514	602764	116660	89752.2	964856	208075	1.03156e+06	145282
formyl-isoglutamine	10.5263	174.064	112928	101399	170048	107408	123896	65544.4	116778	109834
Furfural	13.6444	96.0213	119174	711419	293579	121104	595868	126124	430358	126188
Furfural diethyl acetal	4.37009	170.094	802791	729071	913375	885843	924047	791963	1.04911e+06	1113622
gamma-Glutamyl-beta-aminopropiononitrile	8.86002	199.096	2326922	1.4819e+06	1659303	1.68964e+06	2.10781e+06	2.09646e+06	1.79697e+06	1.59889e+06
Gamma-Glutamylglutamine	15.1837	275.112	1.03977e+06	1600113	965633	357130	4.37348e+06	452210	3089430	366660
Gammaglutamylornithine	17.7339	261.133	0	91395.4	21905.4	0	32273.1	0	47825	0
gamma-Glutamyl-Se-methylselenocysteine	16.4615	312.022	287285	213764	414111	276735	306032	244294	301655	251433
gamma-L-Glutamyl-D-alanine	14.3645	218.09	0	176074	176031	0	559646	0	721768	0
gamma-L-Glutamyl-L-cysteine	14.3145	250.062	142881	1.08853e+06	299804	0	1.86933e+06	311850	1.30201e+06	143678
gamma-L-Glutamyl-L-cysteinyl-beta-alanine	12.9528	321.1	105612	496908	207641	88234.2	377143	0	345777	259950
gamma-Undecalactone	4.12882	184.146	0	103215	79789.2	85313.9	64157.8	78246.9	104114	81612.4
GDP	18.3052	443.025	564016	670746	634545	586472	606544	382279	652174	479796
GDP-3,6-dideoxy-D-galactose	12.8179	573.087	0	368584	100312	0	282256	0	323723	47629.2
GDP-L-fucose	17.969	589.083	242360	229313	252484	191566	201275	143362	166643	188209
GDP-mannose	18.6164	605.077	65056.2	54151.9	95023.5	83311.5	70365.3	54589.9	58436.4	67387.9
Genipin	4.25692	226.084	489997	547142	529891	519105	398842	586694	422221	711441
Gln-Leu-Lys-Tyr	16.9964	550.312	0	776927	76649.3	35054	667833	34253.6	796785	53597.4
Glu-Ala-Asp	16.7517	333.118	94549.3	1.04549e+06	772427	96703.7	1.23515e+06	30759.1	886780	161560
Glu-Ala-Glu	16.0889	347.133	237311	162961	180146	175902	198010	93778.4	109413	166743
Glu-Ala-Ser	13.488	305.122	900784	305919	542172	3.48206e+06	183938	2.75771e+06	240156	284528
Glu-Arg	17.8995	303.154	1.66472e+06	419968	1.05348e+06	562871	1.16832e+06	1.24415e+06	1.08628e+06	668417
Glu-Cys-Glu	16.2287	379.105	434624	1.22135e+06	858063	754476	960682	761843	528278	878047
Glu-Cys-Gly	17.1276	307.084	735313	9796330	1.5606e+06	739506	9723567	513162	5618793	793503
Glu-Glu	17.0348	276.096	680295	2997975	1153205	340750	6555234	243587	7.78542e+06	333531
Glu-Glu-Met	9.28392	407.136	407241	87546.4	218794	194012	169627	110537	248153	148946
Glu-Lys-Lys-Phe	16.2878	550.312	332334	313219	268129	309622	298828	292408	314740	160064
Glu-Met	12.0202	278.094	208050	127414	155169	78665.8	368477	108778	395135	104321
Glu-Met-Ser	12.2947	365.126	3.33067e+06	2.27489e+06	3.21164e+06	2.70825e+06	3.09303e+06	1.33631e+06	2416914	2.32688e+06
Glu-Met-Thr	12.1083	379.141	1.3022e+06	558659	1.01557e+06	1.30328e+06	817148	326272	914150	418733
glutaraldehyde	3.98738	100.052	2638848	1.45029e+06	2053801	1.21314e+06	1.36108e+06	1.75072e+06	2.68806e+06	1.63669e+06
Glutarate	14.4665	132.042	0	75388.1	0	0	93773.7	138044	104363	0
Glutarimide	6.047	113.048	368639	310973	237540	435326	411490	475477	281035	236285
Glutathione	19.9394	307.084	712043	4.63675e+06	1.27814e+06	714900	4.3373e+06	391208	2.33639e+06	733251
Glutathione disulfide	17.4542	612.151	8427688	30200524	12500267	6256802	25003828	6.35807e+06	26396088	6512610
Glu-Thr-Thr	17.3813	349.148	48226.1	670071	138831	0	652204	0	542986	0
Gly-Arg	16.8798	231.133	173020	40657.8	180722	192322	47199.5	95194.1	47971.2	232820
Glycerol	10.2204	92.0473	58156.1	55795.2	63961.7	73030	62480.2	56071.6	57725.7	74483.7
Glycerophosphoglycerol	12.9424	246.05	3.63735e+06	5.26688e+06	3401428	3.11273e+06	4.20214e+06	2.11125e+06	3.88383e+06	2.29623e+06
glycerophosphoserine	15.4384	259.046	102403	197319	167046	0	209261	0	113769	81371.8
Glycochenodeoxycholate	4.38314	449.314	136139	118627	162893	93641.5	150494	169562	67264.2	143455
Glycyl-leucine	8.09152	188.116	295819	219004	286778	281254	243311	161592	198807	297729
Glycylproline	12.6748	172.085	276350	199419	219855	164209	278300	54839.3	179426	166412
GMP	16.8724	363.058	57185	111457	106711	81733.7	120641	55363.6	79429.9	78405.2
GTP	19.726	522.991	384014	636664	541417	514340	634200	503400	571200	435232
Guanidinoacetate	15.6706	117.054	410871	302520	444680	364210	483165	335046	395898	423152
GV 150013X	4.166	534.264	515505	646406	684448	445040	492832	596872	734192	550933
H2S2O3	22.0155	113.945	45318.8	124964	71100.8	38769.4	101642	32997.5	104558	44990.5
HEPES	10.4784	238.099	5.37722e+06	3.5558e+06	420300	2282879	709849	1.12754e+06	6.04916e+06	2.25295e+06
Heptanoylcarnitine	4.11952	273.194	1.7273e+06	620915	714624	455235	459175	548041	1.04248e+06	525762
Heptanoylcholine	4.3784	215.188	235973	183748	98066.7	114071	246641	98771.9	103017	78724.7
Heptopyranosides	7.24317	292.153	513578	475667	634402	545839	467206	425704	339035	507211
Herniarin	4.03061	176.047	48463.7	94259.5	99656.1	114648	73373.1	83256.5	53287.9	76776.8
Heterodendrin	4.21744	261.121	2.37076e+06	2.44263e+06	2.31771e+06	2.44639e+06	2284258	2.40703e+06	1.98108e+06	2.49275e+06
hexadecanedioate	7.21512	286.215	354481	430840	389940	341544	380448	323711	293600	574101
Hexadecanoic acid	3.69403	256.24	93369248	176554064	114756248	103530192	131197696	114263784	144711568	123018968
Hexanoic acid	4.76133	116.084	3.6466e+06	3802265	3.95855e+06	3548873	3.59366e+06	4.04981e+06	3.77468e+06	4197531
Hexanoylcarnitine	4.30624	259.178	2.46349e+06	1.9439e+06	2226033	2193432	2216296	2112061	1.74099e+06	2.25709e+06
Hexanoylglycine	7.97342	173.105	161613	166703	176617	156388	197707	168588	136443	174949
Hexylamine	15.0875	101.12	728887	917705	588413	865955	794650	682612	824194	841849
histidine methyl ester	12.6789	169.085	847107	622976	863805	603453	877772	728322	642728	720185
Homoarginine	22.2211	188.127	95326	76920.7	84653.8	78103.8	91325.6	70439.4	73532.7	82102
homofuraneol	5.78001	142.063	737964	621495	602322	712754	551921	573999	586846	883180
Homoisocitrate	19.0044	206.043	49643.7	84807.2	51597.7	36377.2	74703.4	20652.5	36696.7	37576
Homophytanicacid	3.60046	326.318	79033.6	90023.2	59659.8	59475.2	106354	85394.5	89828	80413.6
Homostachydrine	9.39594	157.11	236769	109833	134484	170887	138994	143966	110596	139404
Hydantoin-5-propionate	8.88735	172.048	1.18616e+06	1691678	1.70448e+06	1.43294e+06	2159035	2.28881e+06	1.88847e+06	1.67282e+06
Hydroxyacetone phosphate	12.9842	154.003	0	113447	0	0	100755	0	88008.5	0
Hydroxyhexanoycarnitine	4.13376	275.173	6132245	5.86802e+06	6393878	5331877	6.12142e+06	6.58101e+06	5672445	6.98964e+06
Hymenoxon	4.16208	282.147	2641238	1.43615e+06	2.16702e+06	1.25917e+06	1.56349e+06	1816921	2166989	1.57152e+06
Hypotaurine	14.9029	109.02	418436	1.15212e+06	452940	385537	870745	284682	688676	436136
Hypoxanthine	9.96493	136.039	0	30184.6	0	22313.6	46150.7	31788	0	0
Ile-Ala	11.7809	202.132	547892	283262	472639	481655	459319	362461	315797	392649
Ile-Ala-Ser	11.0322	289.164	239857	295848	301387	246900	341975	273898	339206	272179
Ile-Asn	9.64443	245.137	124591	84199.7	60894.8	101495	138785	124188	137119	115429
Ile-Ile-Pro	12.4331	341.231	371538	748684	608749	477888	805931	385230	461318	306911
Ile-Lys	19.9376	259.19	854041	559026	1238915	758065	744958	632400	478740	871214
Ile-Lys-Gln-Tyr	27.674	550.312	356066	347880	330657	325007	320686	345391	343047	362340
Ile-Ser	8.13597	218.127	200792	134706	212103	170815	128570	137398	238316	189783
Ile-Val	10.0937	230.163	108719	127274	153193	101187	114316	90479.9	99489.1	111857
Imidazol-5-yl-pyruvate	11.7387	154.038	107709	121887	146772	99866.8	141690	64488.6	91727.4	134634
Imidazole-4-acetate	11.7256	126.043	167386	128164	240268	166888	200197	199203	163268	191597
IMP	15.4977	348.047	74630.6	73678.7	66052.9	57425.2	49848.7	0	46147.2	0
Indole	9.7369	117.058	96115.4	109324	107673	105893	129573	111290	128383	133885
Indolelactate	8.02273	205.074	0	324817	0	0	0	0	0	0
Inosine	10.6343	268.081	3.49766e+06	185522	1.46166e+06	827664	534835	679552	2.92941e+06	292167
Integerrine	3.79334	593.301	1.20479e+06	790727	875031	608183	830803	859154	1.18049e+06	846728
Isatin	6.02696	147.032	780572	750076	954971	726202	740207	777466	765286	850926
Isoamyl formate	6.22758	116.084	289461	363382	509513	499777	360742	418009	318101	621297
Isobutyryl-L-carnitine	4.11053	231.147	3.09002e+06	1.95016e+06	3120752	1.50769e+06	2.08212e+06	2.18139e+06	2.87595e+06	2.04157e+06
Isonicotineamide	13.7707	122.048	2264176	4.01915e+06	2214128	1.87818e+06	3805311	1.67655e+06	3.06814e+06	2.05001e+06
Isopentenyl adenosine	4.67	335.159	1.12909e+06	955358	1.09269e+06	974692	1.09062e+06	1.07699e+06	876585	989464
isophthalate	16.9524	166.027	731558	998849	1195016	741702	1.05949e+06	838543	1.05055e+06	1.00343e+06
Isouvaretin	4.26949	378.147	652536	628246	517218	442621	454330	492008	712210	497092
Isovalerylcarnitine	7.44219	245.163	166621	99978.3	118042	115475	180216	110142	85298.8	132958
Isovalerylglutamicacid	7.31556	231.111	1.01321e+06	1.28178e+06	1.15386e+06	1.1379e+06	1.20646e+06	1.05442e+06	1.11372e+06	1.29708e+06
itaconic anhydride	4.77929	112.016	110250	107727	147045	103554	84297.7	101882	115828	113183
L-1-Pyrroline-3-hydroxy-5-carboxylate	12.3649	129.043	123180	522279	216118	126785	563576	173723	664848	185944
L-2-Amino-6-oxoheptanedioate	9.62351	189.064	14432668	17712644	14965610	14880787	20547374	17715268	17452824	16865014
L-5-Carboxymethylhydantoin	9.94264	158.033	499810	629266	604280	610986	716195	629649	671786	531857
L-Alanine	14.6345	89.0477	1.68332e+06	3.8684e+06	2.05834e+06	1345942	5.03206e+06	1.73827e+06	4.27044e+06	1.77071e+06
L-Arabinose	12.0892	150.053	371238	731463	374868	330387	721874	196265	701200	211426
L-Arginine	23.7636	174.112	62100080	50665716	55285300	46952100	74865656	73565152	59779448	53583412
L-Asparagine	15.2098	132.054	2782078	17590912	2.52175e+06	1.7348e+06	26638838	2.11391e+06	10240810	2.0558e+06
L-Aspartate	15.1102	133.038	1.36562e+06	3.72327e+06	1.48995e+06	1.05951e+06	5420614	1.10688e+06	2732383	1.4507e+06
L-Aspartate 4-semialdehyde	10.7721	117.043	194334	145361	175924	181798	179382	128382	199377	156766
L-beta-aspartyl-L-alanine	15.7997	204.075	97066.7	195399	90714.9	71413.7	200955	51460.8	104921	62380.6
L-beta-aspartyl-L-glutamicacid	17.9686	262.08	208977	229948	234705	150292	226898	133034	175402	178119
L-beta-aspartyl-L-threonine	15.7833	234.085	75940.6	98380.6	57924.5	30937.9	95615.3	27519.8	71934.1	29475.4
L-Carnitine	12.7985	161.105	22515736	14063100	20714024	23926882	16682717	12513633	12372097	18180954
L-Citrulline	15.6995	175.096	531650	819931	542830	465637	1.06685e+06	499188	657686	463091
L-Cladinose	4.76029	176.105	191889	193218	184179	161499	194426	127436	175100	189037
L-Cysteine	16.2017	121.02	144192	38355.4	88654	69860.9	97327.2	64945	79557.9	60607.2
L-Cysteinylglycinedisulfide	15.2709	297.045	0	0	0	0	0	0	0	0
L-Cystine	16.2399	240.024	179725	51773.3	89804.5	0	192858	0	182113	44284.6
L-Djenkolic acid	15.9227	254.04	0	0	0	0	0	0	0	0
Leu-Pro	12.4965	228.148	408276	244574	427406	386459	326994	203970	271158	429675
L-Formylkynurenine	9.49294	236.08	5.85343e+06	7571649	12547784	9212473	11088276	8781420	10842034	9148291
L-Fucose 1-phosphate	13.5849	244.035	0	40604.5	0	0	0	0	49466.7	0
L-gamma-glutamyl-L-isoleucine	10.3464	260.138	2504903	1459957	2.89634e+06	1.73791e+06	2.90237e+06	2.51514e+06	2298846	2.06646e+06
L-gamma-glutamyl-L-leucine	11.2239	260.137	96691	126740	144567	92074.9	131683	57905.5	123979	99835.2
L-Glutamate	14.7988	147.053	34815476	64806500	44710748	31870198	83622896	23259308	69714664	29725506
L-Glutamate 5-semialdehyde	8.98286	131.058	8.28567e+06	4656593	6772139	7.08651e+06	5580722	3.52981e+06	3.58138e+06	5.82277e+06
L-Glutamate methylester	9.57642	161.069	4605409	3.04174e+06	4.28544e+06	4.03493e+06	3.60327e+06	2233017	2.76518e+06	3.46373e+06
L-Glutamine	14.9031	146.069	75427168	206880848	83407264	51761188	297604704	92066872	219359936	68517120
L-Histidine	14.3463	155.07	9828667	13509343	7866447	8694470	15531358	12850054	11896786	8.30134e+06
L-Histidinol phosphate	14.3315	221.057	697024	2.1425e+06	627558	560852	1.62116e+06	700403	1.3624e+06	660966
Linamarin	6.17731	247.105	898436	1.0164e+06	1.25865e+06	1.14574e+06	963041	994942	850838	1.61632e+06
Linoleamide	3.99018	279.256	2247795	1.29632e+06	2.21564e+06	768046	1.64024e+06	1.27022e+06	2778335	1465273
L-Isoleucine	10.8395	131.095	8.28018e+06	6440399	8270270	7.47839e+06	9251893	9048656	7.64914e+06	8422790
L-isoleucyl-L-proline	9.39992	228.147	944974	515394	812786	656169	817832	514947	542984	760991
L-Kynurenine	10.3742	208.085	6435404	6.12523e+06	8724719	6.5402e+06	8817660	6.67699e+06	6.90834e+06	7611013
L-lactide	5.1536	144.042	279900	186643	249784	236636	177454	243900	221163	272616
L-Leucine	10.439	131.095	101899728	75606512	95349800	84192912	125424264	101173456	98534264	97536136
L-Lysine	22.4611	146.106	5.75026e+06	4.61336e+06	5.50188e+06	4031370	8905755	9000696	7535670	5517171
L-Lyxonate	13.9409	166.048	1.0443e+06	1.52036e+06	1.07647e+06	1.16282e+06	1.46722e+06	0	813709	1.20551e+06
L-Methionine	11.1725	149.051	39386616	38741600	38857280	33686928	62573204	42885128	51201600	43704516
L-Methionine S-oxide	13.2399	165.046	291536	1.62023e+06	1.93508e+06	335618	1.60727e+06	623149	1.26506e+06	300360
L-Olivosyl-oleandolide	3.80012	516.293	1.05724e+06	560916	564978	433011	454879	461290	882684	516241
L-Ornithine	21.7272	132.09	2.45388e+06	1.85872e+06	2.461e+06	2.34565e+06	3901472	3.89218e+06	2.61549e+06	2.27354e+06
L-Phenylalanine	9.72432	165.079	48347048	34309572	46263048	40552356	61983896	49072764	45861088	46170100
L-Pipecolate	12.0012	129.079	112720	133987	157323	88310.7	179465	97752.2	120345	107503
L-Proline	12.4221	115.063	282479328	289109120	274432480	282577504	332945568	244698912	223735664	206969056
L-Rhamnono-1,4-lactone	8.05347	162.053	295775	532972	178197	219687	213657	177030	171986	188277
L-Serine	15.7308	105.043	503089	799971	754684	500470	1.51013e+06	906717	1.29442e+06	580250
L-Threonine	14.3817	119.058	781888	2.71489e+06	875515	810286	2.7953e+06	872068	2.39258e+06	909814
L-Tryptophan	11.3071	204.09	1.95377e+06	4.57985e+06	4680410	2.77864e+06	8668271	3911394	7.22051e+06	3.8891e+06
L-Tyrosine	12.8277	181.074	4.02439e+06	15525881	5.94917e+06	3922953	21531288	4949168	18128846	5077726
L-Valine	12.0948	117.079	10696514	18638758	14712695	8780541	34333340	12838983	25249052	12937315
Lys-Lys-Lys-Trp	12.9008	588.373	0	286252	0	0	121451	0	203974	0
LysoPC(16:0)	4.37648	495.333	4.11194e+06	5.1425e+06	3.4364e+06	3.51768e+06	3.21243e+06	4364499	2.16976e+06	4198410
LysoPC(16:1(9Z))	4.44601	493.317	3.5497e+06	2.40559e+06	2043436	1.69172e+06	1.5469e+06	1.37642e+06	1356231	1.79636e+06
LysoPC(18:1)	4.34909	521.349	2.14571e+06	1.972e+06	1271286	975087	1.0103e+06	1.15007e+06	845873	1.29262e+06
LysoPE(16:1)	4.46089	451.27	676954	195507	189357	200452	130856	111542	283773	147222
Macarpine	16.1131	391.105	120087	216412	141086	133510	181390	141930	114553	159929
Magnoshinin	3.91803	414.204	0	0	0	0	0	0	0	0
Maleamate	7.32534	115.027	707799	1.22135e+06	1.26636e+06	962996	1521849	1.45352e+06	1.21958e+06	1127936
Maleic acid	12.9449	116.011	0	103464	0	0	101681	0	92717.7	0
Mesaconate	13.0825	130.027	1.38615e+06	2.59878e+06	1.57478e+06	1487999	1.69408e+06	1.21716e+06	2.1075e+06	1.45701e+06
Mesitylene	5.89072	120.094	249966	197382	208406	212254	208320	216345	268997	236756
meso-2,6-Diaminoheptanedioate	22.4443	190.095	37483.2	31009	43220.2	29203.4	67378.8	69607.6	53771.3	40833.7
meso-Tartaric acid	16.1557	150.017	56138.9	81532	76663.8	46826.8	74320.5	75127.7	81546.8	64755.3
Met-Asp-Cys	16.6407	367.087	143153	1.42439e+06	813187	255351	1.05898e+06	195595	792837	466014
Met-Asp-Pro	14.9184	361.131	0	0	0	0	0	0	0	0
Methacholine	12.7506	159.126	928060	507673	793830	827285	686435	491160	485277	639815
methionol	4.54072	106.045	0	0	0	0	0	0	0	0
Methyl cinnamate	4.17667	162.068	494494	403501	524092	417231	445015	523590	519555	454533
methyl pyruvate	4.59021	102.032	333818	349163	322582	256205	225706	278353	326996	347122
Methylacetoacetic acid	4.00777	116.047	790158	476169	666241	433651	461856	635952	652377	674487
Methylenediurea	11.3829	132.065	444012	350834	294822	276561	339605	227176	349215	238483
Methylglutarylcarnitine	4.66887	261.121	1.97543e+06	2299661	2161879	2.07499e+06	2.15148e+06	2.27223e+06	1871556	2289097
Methylimidazole acetaldehyde	7.21069	124.064	266208	284454	527511	360024	152604	236374	0	336198
Methylimidazoleacetic acid	9.46239	140.059	281825	184807	216133	247948	262567	198501	158348	228375
Methylitaconate	7.28668	144.042	11530650	13742133	13271627	12150894	11752635	11071676	10582287	14918517
methylmethanesulfonate	6.94549	110.004	193049	210713	220038	216706	220152	234875	204981	217950
Methyloxaloacetate	8.01798	146.022	583181	642589	625154	639171	541961	584068	495812	641154
methylphoracetophenone	27.3119	182.058	211222	209990	199908	193141	205534	193138	195218	192202
Methylripariochromene A	4.13983	250.121	879634	718078	869376	596226	907411	786908	903568	875391
Met-Met-Met	14.2134	411.131	0	838839	0	0	380676	0	484208	0
Met-Thr-Asp	13.2196	365.126	0	188033	157781	0	169174	0	171243	122293
Met-Val-His	12.7737	385.179	196579	547420	0	0	894329	697196	1.03242e+06	327830
MG(0:0/14:1(9Z)/0:0)	4.37388	300.23	961762	1.14017e+06	934440	875210	965605	970245	839087	1.11969e+06
MG(0:0/16:1(9Z)/0:0)	4.07319	328.261	412167	538814	522724	473365	420345	438458	371492	471608
MG(0:0/18:1(11Z)/0:0)	3.77585	356.293	448086	293990	264972	173584	281612	356576	353334	285641
MG(0:0/20:2(11Z,14Z)/0:0)	3.66554	382.308	309993	122147	169442	39210.3	122930	114228	328976	205604
MG(0:0/24:1(15Z)/0:0)	3.55426	440.387	128624	183795	123438	64086	80098.1	72745.8	80173.6	116678
MG(14:1(9Z)/0:0/0:0)	7.18067	300.23	102203	70560.9	64165.5	58664.7	46451.6	68392.7	76120.8	94199
Militarinone A	3.91762	459.262	0	0	0	0	0	0	0	0
Millettone	8.31014	378.11	544389	372151	512722	482261	455529	475945	492197	491421
Miraxanthin-I	14.8594	358.084	0	0	0	0	0	0	0	0
Miroestrol	10.8177	358.141	0	145575	110472	18276.5	133069	31295.7	111790	78256.7
Monomethyl sulfate	9.00384	111.983	130224	160714	146755	146409	139964	137173	187161	140283
MOPS	10.6444	209.072	0	138946	114085	63485.8	192083	108790	159598	107515
Mukaadial	4.21907	266.151	1776332	1.06721e+06	1.44938e+06	1190904	1.34477e+06	1.34348e+06	1.37081e+06	1.48423e+06
Mundulone	3.86905	434.173	577172	479971	450564	372672	309624	357037	455688	362422
Muramic acid	13.1571	251.1	0	0	0	0	0	0	0	0
Mycosporine	6.24343	261.121	596017	823117	706865	555159	794470	840838	957080	897544
N-(11Z,14Z-eicosadienoyl)-ethanolamine	3.83994	351.314	0	139916	223803	79886.9	344803	265310	0	74812.4
N-(11Z-eicosaenoyl)-ethanolamine	3.85988	353.329	0	238319	160059	74143.2	310069	274454	0	0
N-(3-acetamidopropyl)-4-aminobutanal	6.12235	186.137	298533	377925	563521	389556	485675	550002	617634	316917
N-(3-hydroxybutanoyl)-L-homoserine	7.24259	205.095	2.7128e+06	2.9977e+06	2749960	2.93983e+06	3.432e+06	3.06065e+06	2.18271e+06	3.1604e+06
N-(3-oxooctanoyl)-L-homoserine	4.23054	259.142	10502188	9370511	9633244	9227575	9665274	9739387	8243195	9329588
N(alpha)-t-Butoxycarbonyl-L-leucine	4.63307	231.147	3590308	3.35284e+06	3085912	3.29657e+06	3.06798e+06	3.21509e+06	2.90421e+06	3146966
N(pi)-Methyl-L-histidine	11.8853	169.085	2.78557e+06	1.96948e+06	2.30378e+06	1.92969e+06	3.34863e+06	2.83036e+06	2.51689e+06	2.36935e+06
N,N-dihydroxyisoleucine	7.74243	163.084	2.51613e+06	2.44208e+06	2.249e+06	1.94098e+06	2.077e+06	2.13137e+06	1.9818e+06	2402812
N,N-dihydroxyvaline	9.77405	149.069	91636.9	138220	33505.3	124695	43754.2	88303.7	77500.7	103136
N,N-Dimethylaniline	4.58985	121.089	646892	430196	441392	419547	462714	476390	372771	553737
N,N-Dimethylaniline N-oxide	7.16467	137.084	704636	198743	360528	188274	535857	289166	134669	547626
N,N-Dimethylglycine	11.7707	103.063	582133	816256	579557	521627	959987	594373	790846	523098
N1,N8-diacetylspermidine	14.7802	229.179	3.94875e+06	3.22959e+06	3.20339e+06	4.4697e+06	3.39803e+06	3.01539e+06	2.606e+06	3.74527e+06
N2-(D-1-Carboxyethyl)-L-arginine	13.6374	246.133	1.36509e+06	969468	870667	906397	1.05156e+06	534366	624905	899018
N2-Acetyl-L-aminoadipate	12.4848	203.08	524461	1.11684e+06	935078	626354	1.09784e+06	540680	994447	528782
N2-N2-Dimethylguanosine	8.17924	311.123	499119	275306	412227	367905	425386	242847	278218	376576
N4-(Acetyl-beta-D-glucosaminyl)asparagine	15.6037	335.133	439255	556801	412297	290747	575633	197012	471571	298183
N4-Acetylaminobutanal	10.6438	129.079	146283	178660	245980	222737	204175	111316	110041	119256
N4-Acetylcytidine	7.9068	285.096	560824	331503	375409	282838	400901	181691	237972	379548
N5-(L-1-Carboxyethyl)-L-ornithine	12.8767	204.111	62232.3	453383	170788	83949.9	624143	260100	652614	142884
N6,N6,N6-Trimethyl-L-lysine	21.1964	188.153	1.95663e+06	1.14841e+06	1.57211e+06	1.21644e+06	1597306	960248	949322	1.36027e+06
N6-Acetyl-L-lysine	12.2988	188.116	259260	435221	274874	226393	505059	183693	308033	273572
N6-Acetyl-N6-hydroxy-L-lysine	10.2605	204.111	440828	834593	679546	513981	1.60581e+06	1.61548e+06	1.4796e+06	819041
N6-Methyl-L-lysine	21.9282	160.121	1.34137e+06	725728	1.42562e+06	1.23479e+06	1.21973e+06	846007	877305	1.13011e+06
N-acetyl -D- glucosaminitol	12.8024	223.105	0	137662	125103	0	136453	0	121550	0
N-Acetylanthranilate	7.26832	179.058	1335254	1.01051e+06	902216	807203	1.42302e+06	1.28286e+06	967028	1060580
N-Acetyl-aspartyl-glutamate	17.3749	304.091	3108521	9788635	4.88385e+06	1.97497e+06	9257604	998677	8171869	2.20927e+06
N-Acetyl-D-glucosaminate	15.9601	237.085	305016	297948	249918	176984	355126	157648	242917	222336
N-Acetyl-D-glucosamine	11.4896	221.09	250323	305626	370957	257507	388894	159219	363741	268746
N-Acetyl-D-glucosamine 6-phosphate	14.8283	301.056	0	448520	0	0	457811	0	310540	0
N-Acetyl-D-mannosaminolactone	14.2184	219.074	230027	1.89086e+06	239213	196809	811867	0	681494	184825
N-Acetyl-D-quinovosamine	8.26846	205.095	4535608	4.64232e+06	4480554	4.56325e+06	4662648	4555429	3.70882e+06	4791790
N-Acetylglutamine	10.5737	188.08	812738	714955	1.02485e+06	783673	901971	544171	530024	657702
N-Acetylindoxyl	4.66489	175.063	0	0	0	0	0	0	30696.9	0
N-Acetyllactosamine	13.2625	383.143	0	317701	143298	0	249195	0	210076	0
N-Acetyl-L-aspartate	14.9955	175.048	38404340	333545920	38935520	22973260	377240800	14629054	177876480	31110478
N-Acetyl-L-citrulline	12.5142	217.106	6517934	37105096	1.1163e+06	4777223	42824416	9530937	49292872	9051623
N-Acetyl-L-glutamate	14.4621	189.064	2.38067e+06	22738170	2.69592e+06	2851366	14334534	1.25157e+06	8393640	2.02669e+06
N-Acetyl-L-glutamate 5-semialdehyde	7.36768	173.069	37927156	40163244	25575888	49142788	29848620	48231900	20989950	28385278
N-Acetyl-L-histidine	8.68173	197.08	984396	696414	579758	464292	1.13495e+06	1.23378e+06	802903	667348
N-Acetyl-L-leucine	4.80737	173.105	161600	135520	182176	262462	220827	183489	186497	244319
N-Acetylmethionine	7.23778	191.062	5860163	4.02884e+06	5803938	5.57972e+06	4.13576e+06	2.38657e+06	2.95775e+06	4.32778e+06
N-Acetylmuramate	13.4108	293.111	0	31818.5	0	0	0	0	48881.3	0
N-Acetylneuraminate	13.5031	309.106	0	120310	0	0	110971	0	96830.3	0
N-Acetylornithine	13.0722	174.1	118252	423464	203070	0	548095	235813	488144	179848
N-Acetylvanilalanine	8.07416	253.095	366865	179773	181538	207800	267400	157663	131932	264966
NAD+	13.7633	331.555	20274946	75292808	26182430	17158762	74877544	12239633	54687512	21847486
NADH	13.4083	665.125	2.16856e+06	5.30408e+06	4.21155e+06	2.54914e+06	5.60725e+06	1.4533e+06	3236501	2392918
NADP+	16.8343	371.538	5442597	2.25364e+06	3181607	2.41585e+06	2.95689e+06	1.84029e+06	4954603	2.42337e+06
NADPH	17.7172	745.092	437547	2.87433e+06	1.88918e+06	1.34724e+06	2.90619e+06	763904	631134	1.29992e+06
Nalpha,Nalpha-Dimethyl-L-histidine	8.24864	183.101	289229	219146	290900	287855	219274	165350	174654	223336
Nalpha-Methylhistidine	9.55011	169.085	15115209	11463977	15691908	16025404	12505075	9126322	11785987	12615395
N-Butyryl-L-homoserine lactone	5.52391	171.09	256781	254138	447217	338320	249638	238582	248729	395861
N-Carbamoyl-L-aspartate	17.2789	176.043	125603	801156	247118	139883	862958	0	1.28805e+06	33657
N-Carbamyl-L-glutamate	9.9442	190.059	2845388	3516498	2722586	2742296	3994231	3.44619e+06	3.41171e+06	3236555
N-Carboxyethyl-g-aminobutyricacid	13.3735	175.085	122119	217122	227842	145659	270091	130676	227692	119634
N-Decanoylglycine	4.58761	229.168	293126	447422	368165	480423	578103	362407	888988	538550
Ne,Ne dimethyllysine	20.8805	174.137	294636	267003	289098	236904	355779	235798	255465	266867
N-ethylsuccinimide	5.96931	127.063	1.88836e+06	1.47626e+06	1.92382e+06	2.18011e+06	1.16523e+06	2634599	1.41268e+06	1.07577e+06
Neuraminic acid	16.677	267.095	214716	690457	806990	246381	882289	157633	724220	372375
N-Formimino-L-glutamate	11.5385	174.064	346836	500670	380277	334708	490497	184071	360596	316379
N-Formyl-L-methionine	7.26229	177.046	2.66594e+06	2.11714e+06	2.78748e+06	2.73221e+06	2.23784e+06	1.44885e+06	1510731	2.37894e+06
NG,NG-Dimethyl-L-arginine	21.0494	202.143	1.20708e+06	1.02651e+06	1.10432e+06	916841	1.19474e+06	970773	877832	908857
Ngamma-Monomethyl-L-arginine	24.2335	188.127	56764.6	42976.9	56296.8	43547.3	60208.9	51520.9	58631.3	45375.1
N-Glycolyl-D-glucosamine	18.8789	237.085	19442.8	79844.4	0	0	109479	0	23551.6	20761.7
N-Heptanoylglycine	4.92314	187.121	1.77588e+06	1542957	1.84231e+06	1.58946e+06	1.84408e+06	1.67812e+06	1.56998e+06	1.87312e+06
N-hydroxyisoleucine	8.54531	147.09	0	103087	80218.5	0	121087	0	90426.5	62010.2
N-Hydroxy-L-tyrosine	10.3595	197.069	0	0	0	0	0	0	0	0
N-hydroxy-N-isopropyloxamate	7.30849	147.053	1.13678e+06	1.44193e+06	1.30347e+06	1.08888e+06	1.38352e+06	1.19868e+06	1.36817e+06	1.04026e+06
nicotinamide riboside	23.5613	254.09	258530	178711	224366	185368	210203	160704	173589	210052
N-Methylethanolamine phosphate	14.6821	155.035	177774	473190	190470	191120	456219	0	313328	230899
N-Methylnicotinate	17.2442	137.048	0	0	0	0	29709.9	0	34150.7	0
N-Nonanoylglycine	6.12064	215.152	725229	767127	688612	704969	755988	675674	750390	761398
nonulose 9-phosphate	17.122	350.062	337786	600314	438378	288433	654119	195692	593068	284817
N-Phenylacetamide	9.50929	135.068	104480	107561	170108	115332	149023	131505	177907	122341
n-Propyl gallate	4.89436	212.069	1731369	1.89842e+06	1.73186e+06	1.69369e+06	1.52814e+06	1.64154e+06	1.47493e+06	1.65873e+06
N-succinyl-L-citrulline	8.05643	275.112	4797191	8972553	632612	4.20062e+06	9677119	8554628	8438190	7.7537e+06
N-Succinyl-LL-2,6-diaminoheptanedioate	11.8624	290.111	1.29846e+06	327656	902903	288138	1409307	180965	3468643	258879
N-Undecanoylglycine	4.37579	243.183	1.2391e+06	2261300	1.66338e+06	1.55492e+06	3.94024e+06	1.79036e+06	2.97074e+06	2.85034e+06
N-α-L-histidine	10.1166	197.08	1.34812e+06	918854	1.17554e+06	918400	1.17242e+06	742651	813070	1.26439e+06
O-Acetylcarnitine	7.21305	203.116	829346	451153	549138	502700	667086	444408	329616	645284
O-Acetyl-L-homoserine	10.6457	161.069	712728512	230984816	588709248	466307200	459840672	365950048	545042688	389166240
O-Acetyl-L-serine	10.7968	147.053	13252273	13027379	16073140	12733974	13484560	7.67546e+06	9323201	12797534
O-Butanoylcarnitine	8.03834	231.147	3793703	1.90462e+06	2667676	3046995	2.09901e+06	1.42304e+06	1.57301e+06	2.01042e+06
Octadecanamide	3.90453	283.288	0	257271	114776	278195	255601	136676	0	110765
Octadecanoic acid	3.65654	284.271	77142448	149994640	94318520	91973552	106699216	103193344	109929576	102133440
Octane-1,8-diol	4.60263	146.131	0	0	0	0	0	0	0	0
octulose 8-phosphate	16.8276	320.051	452062	503706	554201	453656	549085	313397	483631	372932
Octylamine	9.03904	129.152	1.2099e+06	1.19161e+06	1.13214e+06	1.11278e+06	1.14957e+06	1.15477e+06	1.05021e+06	1150937
Oleandolide	4.05065	386.231	620019	369214	542697	351890	551389	482477	500972	497410
O-Palmitoyl-R-carnitine	3.79495	399.335	170815	275817	110930	133597	339785	384451	72006.1	262347
Ophthalmicacid	13.3765	289.128	0	420188	86171.1	0	307363	0	282106	0
O-Propanoylcarnitine	6.24507	217.131	1.45958e+06	1589914	2.69953e+06	2444016	1.72703e+06	1880394	1.2479e+06	2.71355e+06
Orotidine	12.8144	288.059	492852	1.03711e+06	459440	476080	860731	285664	814861	400884
Orthophosphate	14.3946	97.9771	219125	955540	436461	244063	1.07526e+06	257657	698774	502396
Osajin	4.30111	404.162	443175	148178	397056	322185	257744	335914	459855	272442
Ovalifolin	4.86537	346.12	611727	222387	523889	323359	346245	530938	857727	352764
Oxalate	18.5226	89.9953	100968	247793	123276	95209.9	206987	113246	186393	101134
Oxidized Watasenia luciferin	16.7036	571.072	1.85252e+06	3.21089e+06	2.01213e+06	1.14829e+06	3.02843e+06	650364	2.26666e+06	1.4956e+06
Oxoamide	7.59748	192.09	1.32231e+06	853586	1.05728e+06	1.1024e+06	946152	693808	539530	1.00324e+06
PA(P-42:4)	3.95498	764.57	2.58079e+06	1.18796e+06	1.03006e+06	685150	699024	866096	2.35986e+06	975268
Paeonoside	4.36112	328.116	367633	338121	393071	328272	326166	347342	453263	388075
Palmiticamide	3.98907	255.256	0	133191	0	127765	133004	0	0	0
Palmitoleamide	4.01135	253.24	0	0	0	0	0	0	0	0
Pantothenate	8.56042	219.111	77325704	35461796	55278564	55231820	49299180	34327752	38097504	45024324
Pantothenol	11.3653	205.132	137088	250363	191795	166123	298656	210047	279584	188847
Patrinoside	4.89153	462.209	348744	379145	292123	374623	269430	295171	240306	321469
PC(2:0)	6.28993	299.113	109288	157566	143405	106417	127454	128974	134725	95046.7
PC(32:1)	3.77345	731.546	15256611	474632	1.53518e+06	703797	592643	479985	7396987	747473
PC(34:1)	3.74735	759.577	15368493	392379	1.88188e+06	1.02194e+06	836189	724475	8664281	751643
PC(34:2)	3.74629	757.562	13024212	310336	1.17379e+06	620484	421400	299560	6.16446e+06	474808
PC(36:2)	3.71908	785.593	9008965	252978	1.02082e+06	663421	414289	405518	5.15928e+06	507466
PC(36:4)	3.73672	781.562	1.35904e+06	0	0	0	0	0	809410	0
PC(38:4)	3.71041	809.593	1.22938e+06	0	83231.9	0	0	0	675680	0
PC(38:5)	3.72773	807.577	1.79542e+06	0	183818	123266	0	0	819739	0
p-Cresolglucuronide	7.20572	284.09	362239	433951	521727	350207	333705	253928	278252	472162
PD 123319	3.89	508.248	407852	211241	291109	227994	186059	227383	431566	280114
Pendimethalin	4.06602	281.138	1.17171e+06	1.16523e+06	1.62536e+06	970501	1.05243e+06	1.25983e+06	1.05792e+06	1.35094e+06
Pentadecanoic acid	7.08468	242.225	242356	221547	217452	237000	213050	206405	256448	223306
Phe-Asp	12.4347	280.106	0	264958	136148	0	207855	0	185156	86953.6
Phe-Gly	10.9905	222.1	0	0	0	0	0	0	0	0
Phenol sulfate	5.19886	173.999	367422	305498	488083	458454	382951	362409	502162	282975
Phenolsulfonphthalein	7.26136	354.056	940503	832736	885344	644775	1904109	2.04329e+06	1.1564e+06	379239
Phenylacetic acid	5.69729	136.052	154200	178120	200107	205799	198785	225701	306846	308770
Phenylacetylglycine	7.31971	193.074	0	0	0	0	0	0	0	0
Phenylethyl alcohol	4.2812	122.073	5.28998e+06	3.92123e+06	4652763	3.33168e+06	4.44325e+06	4.18538e+06	4.47006e+06	4.1193e+06
Phenylethylmalonamide	8.54029	206.106	0	0	0	0	0	0	0	0
Phenyllactate	6.46771	166.063	184009	115141	188286	142596	89194.3	162252	119259	88876.2
Phenylpropanoate	6.18131	150.068	208667	218648	207755	204092	234896	268592	312456	310238
Phenylpyruvate	4.72866	164.047	57075.9	39109.1	0	0	39761.9	32414.2	29665.6	40647.7
Phosphocreatine	15.2406	211.036	1.66569e+06	8847356	2191501	1.15955e+06	15136496	850956	5350628	1628134
Phosphodimethylethanolamine	14.6114	169.05	3.7324e+06	21837450	4.21128e+06	3.19056e+06	22369112	2.22653e+06	17774966	3414328
Phosphoenolpyruvate	18.2527	167.982	119578	104477	265288	160397	188195	97106.1	139355	124656
Phosphonoacetaldehyde	13.9566	123.993	1.2406e+06	2.94995e+06	1.30104e+06	949470	3.53459e+06	601598	1.9303e+06	1234242
Phthalate	15.6231	166.027	872674	1.10002e+06	950121	873557	989599	788080	906859	964454
Phytuberin	3.77829	294.183	2.25712e+06	2.18076e+06	2.18612e+06	2006290	2.4303e+06	1.98411e+06	3003658	2.09529e+06
PI(34:1)	3.55858	836.54	1.18325e+06	104110	151711	182487	92299.8	74869.1	552032	66365.3
PI(36:2)	3.5531	862.558	1.72082e+06	157493	203782	245342	107105	120455	799939	112289
PI(38:2)	3.51853	890.587	681168	65943.5	135155	152726	56762.9	57252	406792	64172
PI(38:3)	3.5381	888.572	1.4115e+06	92165	202056	249902	126398	106666	874103	105899
PI(38:4)	3.53318	886.558	1.28621e+06	94688.7	180555	226879	70674.5	110532	786542	101787
Picein	4.79895	298.105	351759	416476	337956	320343	354982	302978	336867	369355
Picolinamide	7.26276	122.048	59455336	39072828	48933348	44798468	54986116	42094412	47982468	40673132
Piperidine	13.9539	85.0893	495074	996826	518242	372389	1.27578e+06	286988	710379	439370
PIPES	14.972	302.061	717268	6.91728e+06	917194	619378	5.46943e+06	808204	4.17233e+06	712724
Pirbuterol	12.1674	240.147	763198	429553	507330	551657	615131	344305	380820	490613
polyprenylpyrophosphate	4.15272	300.052	178804	208711	208256	208491	226356	174073	205559	161994
Prenyl-L-cysteine	7.36003	189.082	181292	90088.8	248656	108941	158330	148743	215328	149666
Proclavaminic acid	9.6987	202.095	460695	271427	626657	527010	479562	467276	331760	386751
Propanoyl phosphate	11.8063	154.003	64081.4	84079.2	93624.3	43822.7	110582	45539.1	94135.3	56513.8
Prostaglandin F1alpha	3.81277	356.256	421989	361044	455831	339238	317651	425649	389610	380249
PS(32:1)	3.56409	733.49	876481	129517	138707	121748	45834.8	58129.5	468570	67540.6
PS(34:1)	3.57759	761.521	3.16078e+06	363800	400352	384757	196930	187279	1.67386e+06	227544
PS(36:1)	3.52947	789.552	3.31566e+06	288141	435080	529667	230428	257474	2034286	243972
PS(36:2)	3.56078	787.537	1.69336e+06	184996	216542	208350	105200	103940	939600	128250
Pseudouridine	11.8017	244.069	2.26508e+06	2.96784e+06	3615807	1.94719e+06	3514078	1.32353e+06	2.24145e+06	3.37797e+06
Pseudouridine 5'-phosphate	16.817	324.036	202117	137154	173387	150643	146483	76984.2	155262	139863
Psicofuranin	9.1257	297.107	761919	641192	632244	484630	777387	369877	441760	671970
Ptaerochromenol	11.0054	274.083	12071.4	226408	141579	13435.4	294419	35770.2	276403	64364
Pyridine-2,3-dicarboxylate	15.7601	167.022	2.03012e+06	1.50736e+06	1.61144e+06	859472	1.88345e+06	622340	1.30133e+06	1153171
Pyridoxal	7.86477	167.058	1.17401e+06	1.36354e+06	1.24612e+06	1.25287e+06	1.31033e+06	982570	651785	1496135
Pyridoxine	7.75247	169.074	11646602	7.28422e+06	11009030	8.17595e+06	11372018	12410465	9040687	9045884
Pyruvate	8.52304	88.0159	160740	423876	194802	281903	241783	209898	149315	302192
Quinalphos	3.79693	298.055	161936	288989	208448	299776	276575	100282	164688	319510
quinolin-2(1H)-one	4.66979	145.053	0	0	0	25867.9	29048.2	22232.1	0	0
Rhododendrin	4.08857	328.152	1926796	1.69892e+06	1.7861e+06	1.47705e+06	1.55974e+06	1.72075e+06	1.73264e+06	1.77954e+06
Riboflavin	8.00114	376.138	162594	746450	512107	490633	709406	638925	212269	581137
Riboflavin cyclic-4',5'-phosphate	11.3344	438.094	154935	160124	205019	162314	212627	91395.9	139547	140088
Ribothymidine	7.35625	258.085	0	0	0	0	0	0	0	0
Ricinine	8.0351	164.059	48854	60287.2	37777.3	41417.4	132957	71019.2	0	45688.5
S-(2-Methylbutanoyl)-dihydrolipoamide	4.42162	291.132	2926264	3042584	2.83668e+06	2891481	3.12658e+06	3.01701e+06	2.5315e+06	3.01441e+06
S-(3-Methylbutanoyl)-dihydrolipoamide	4.88556	291.132	1.32867e+06	1.34654e+06	1.16461e+06	1.44581e+06	1.31018e+06	1.42436e+06	1.05597e+06	1.33003e+06
S-(Formylmethyl)glutathione	12.1812	349.094	206085	2.04381e+06	382443	389710	1.11958e+06	200875	445570	424957
S-8-methylthiooctylhydroximoyl-L-cysteine	4.09446	308.123	420611	518224	483335	444984	455919	514537	371599	439233
S-Adenosyl-L-homocysteine	13.0071	384.122	1.26881e+06	1.16686e+06	1.31913e+06	1.04378e+06	1.30143e+06	495545	972972	1.09415e+06
S-Adenosyl-L-methionine	15.8549	398.137	20986960	16349930	15815716	12187566	19032540	8.21125e+06	13740219	13513511
Salicin	7.30688	286.105	597838	585276	445298	422588	448726	421292	437344	441886
Ser-Ser-Tyr	9.88567	355.138	228653	372685	311438	318679	546573	407097	451244	418374
Shikimate	13.5655	174.053	0	102579	0	0	51928	0	72332.8	0
Sinapyl alcohol	4.16408	210.089	1.56811e+06	1117551	1.30977e+06	1.09935e+06	1.31485e+06	1.3674e+06	1.42629e+06	1.23459e+06
SM(d18:1/24:1(15Z))	3.81912	812.678	3.44412e+06	226354	705899	699270	432331	406150	2.62183e+06	493485
SM(d34:1)	3.93122	702.567	11130645	3.15239e+06	2.63262e+06	1.97862e+06	1.96686e+06	2.10345e+06	8.07008e+06	2.83773e+06
sn-glycero-3-Phospho-1-inositol	16.1646	334.067	9928442	8021729	8120033	8096200	5.87264e+06	3.90885e+06	4545341	6.09252e+06
sn-glycero-3-Phosphocholine	13.9543	257.103	286114336	698239872	313737216	201884656	736697472	150143296	476538464	282813312
sn-glycero-3-Phosphoethanolamine	15.4039	215.056	7266415	8772011	7.41117e+06	4850645	9516175	3.70779e+06	6.54724e+06	5.14031e+06
sn-Glycerol 3-phosphate	15.0632	172.014	3.31623e+06	6384465	3.02687e+06	2.04118e+06	6824548	1011322	4.00437e+06	1.98723e+06
sn-glycerol-1-phosphate	13.9673	172.014	2372287	3.64399e+06	2513466	1.74755e+06	3879924	1244434	2742443	2.30066e+06
sodium dodecyl sulfate	3.59908	266.155	4.49043e+06	6464887	4531323	4.83838e+06	18632598	7448298	6234834	5.77336e+06
S-sulfanylglutathione	17.4568	339.056	171793	64824.5	102962	94701.2	71867.5	119321	67674.6	105603
S-Sulfo-L-cysteine	17.7982	200.977	0	0	0	0	0	0	0	0
Stealthin C	16.8954	307.084	1.07411e+06	1.42543e+06	1.09833e+06	1140096	1.44367e+06	675500	934840	775135
stigmast-5-en-3beta-ol 3-0-beta-D-glucopyranoside	3.91079	576.439	0	0	0	0	0	0	0	0
Suberylglycine	6.26522	231.111	579261	980314	897699	675167	821500	1.06822e+06	896344	578402
Succinate	15.6059	118.027	3135634	3.01896e+06	2.86455e+06	3.3388e+06	4495132	3.07311e+06	3.44183e+06	3998324
Succinyl proline	13.2514	215.079	0	175045	89305.9	109270	179975	72169.9	172287	0
Succinylacetone	5.99765	158.058	955052	1.17471e+06	703416	670599	541795	542314	490024	973716
Sulfoacetate	18.9126	139.978	33644.8	50299.4	44847.2	37068	49107.5	30725.2	61855.8	41559.7
Taurine	15.3156	125.015	28188338	21868052	24593918	19258452	27648122	13077927	19887558	18961552
Taurocholate	27.3691	515.292	111200	114983	116536	116175	125098	124641	132049	123845
Taurohyocholate	4.51946	515.291	198759	341139	231893	211154	251420	237892	208547	237458
Tauropine	9.34581	197.036	447025	300584	390870	345069	314953	164401	173277	340288
Terephthalate	15.9735	166.027	872674	1083406	950121	873557	942702	788080	906859	964454
Tetracosanoic acid	3.57859	368.366	138870	243325	170217	205342	244785	150466	98862.6	178986
Tetradecanoic acid	3.7397	228.209	4905842	7086351	6.00401e+06	4.77745e+06	5741490	5.43193e+06	7.44314e+06	6.15516e+06
Tetranor-PGF1alpha	4.12727	300.194	1409605	1.04757e+06	1.40765e+06	977408	968575	1.03528e+06	1166286	1.05628e+06
Thiamin diphosphate	14.0673	424.037	140134	498703	243021	173925	436338	0	409678	147175
Thr-Cys-Tyr	9.73571	385.13	238788	182876	223443	157292	264990	200607	215508	216849
Tiglylcarnitine	4.11424	243.147	9013950	5.07302e+06	9066423	4.03876e+06	5.65929e+06	6877110	7256419	6.92962e+06
trans-3-Octenedioic acid	11.3026	172.074	0	261387	50491.7	0	209181	0	191491	68898.2
trans-4-Hydroxycyclohexanecarboxylate	8.37783	144.079	2611528	2.80204e+06	2.72274e+06	2.64782e+06	2.52401e+06	2.52364e+06	2.17507e+06	2.72588e+06
Triacetin	5.99578	218.079	278051	306423	463322	404283	334223	346722	302833	474243
Triacontanedioic acid	3.53066	482.433	52197.5	63212.9	56966.6	30960.8	46863.9	50556	59177.1	46965.6
Tributyrin	4.14356	302.173	1.55386e+06	1.36964e+06	1.53407e+06	1.25161e+06	1.43729e+06	1.43231e+06	1.36336e+06	1.4755e+06
Trimethylaminoacetone	27.5242	115.1	1.61861e+06	1.40743e+06	1.28607e+06	1.34578e+06	1.45282e+06	1.39003e+06	1443812	1.25568e+06
tropine	27.5813	141.115	617283	563459	574487	522265	689110	528645	646271	602006
Tyramine	6.56518	137.084	312569	186405	197724	151982	300529	275509	119570	247896
Tyramine-O-sulfate	7.24905	217.041	390149	190459	299684	245243	357160	349012	365784	240417
U 0521	6.19389	180.079	446808	471146	635592	597460	413592	505853	415943	739991
ubiquinol-1	4.07351	252.136	2.16459e+06	1.41628e+06	1.94953e+06	1.10667e+06	1.36665e+06	1.45513e+06	1.79793e+06	1552264
UDP	16.8528	404.002	3.01327e+06	8408709	3493599	2767682	7.49786e+06	1.67241e+06	7.25138e+06	3135034
UDP-D-xylose	16.6251	536.044	272946	408165	360308	236030	360282	63669.5	267972	225592
UDP-glucose	16.7038	566.055	2901560	5.14412e+06	5523557	3.0247e+06	6462928	1.92888e+06	7055102	2.85942e+06
UDP-glucuronate	19.8884	580.035	336345	552293	804234	436994	905362	335655	996265	453579
UDP-N-acetyl-2-amino-2-deoxy-D-glucuronate	16.2592	621.062	651868	1.04023e+06	1.33929e+06	1.14059e+06	1.37627e+06	922255	680887	1.23934e+06
UDP-N-acetyl-D-galactosamine	15.327	607.081	2927826	6.18003e+06	2.85119e+06	1.43093e+06	5.80895e+06	1.40005e+06	4.38263e+06	2439470
Umbelliferone	4.84171	162.032	3.22259e+06	3.0461e+06	3144519	2.56014e+06	2828599	3302349	3.7666e+06	2.56885e+06
Urate	13.0157	168.028	0	206931	0	0	215593	0	288324	0
Urocanate	10.9758	138.043	223681	403529	246507	291616	1.55564e+06	401908	278454	395690
Ursodiol	7.17117	392.292	233293	311808	278979	222623	365233	252040	398038	412226
UTP	18.2319	483.969	5.68535e+06	7123228	6654891	5843150	6428284	3.9917e+06	6.46404e+06	5581880
Valerylglycine	4.81272	159.09	89681	93324	44097.2	50108.5	63187.2	80495.6	141773	68659.8
Valproicacidglucuronide	9.64778	320.147	206979	203869	198701	199541	188868	180030	136301	221439
Valproylglycine	4.79029	201.137	249592	319509	240469	324762	264821	366925	341335	326162
Val-Val	12.7466	216.147	257452	171387	195118	186296	225112	84697.3	141876	192112
Vanillacticacid	6.24192	212.069	530207	1.41564e+06	1.39347e+06	841306	1.06378e+06	1.42483e+06	1.77999e+06	722405
Xanthine	11.5124	152.033	741674	623470	1.13307e+06	836387	875630	966194	775360	1107102
Xanthosine 5'-phosphate	18.5663	364.042	61245.9	17693.4	27259.3	39717.8	22796.7	0	18530.1	0
Xylitol	12.8264	152.068	125724	205773	216754	105523	235071	130971	189446	113003
ZAPA	13.661	146.015	145634	0	106230	0	103522	0	120326	0
α-(2,6-anhydro-3-deoxy-D-arabino-heptulopyranosid)onate 7-phosphate	16.4613	272.03	450243	558250	407869	481228	697580	307246	501783	318201
γ-glutamyl-L-alaninol	11.4651	204.111	602649	332894	604685	542918	600611	424616	399148	424693
γ-glutamyl-S-t-propenylcysteine	11.5689	290.094	381704	107210	301201	136039	358350	178238	687377	149954
γ-thiomethyl glutamate	9.86779	193.041	192254	261219	253458	247387	271219	179567	162471	216791

## Sheet: EXP3_Target
Compound	CP_control_1	CP_control_2	CP_control_3	CP_control_4	CP_isoprenaline_1	CP_isoprenaline_2	CP_isoprenaline_3	CP_isoprenaline_4
(S)-Lactate-0C	3492654200	2252118981	2122774164	2554148034	2366305466	2075205356	1459668828	2404961101
(S)-Lactate-1C	151440879	93810499	92227793	108731055	101406197	86506610	63116050	103382378
(S)-Lactate-2C	29430633	17639525	19835073	20558409	18529597	12794862	11935496	18771450
(S)-Lactate-3C	732771600	445350412	496705864	596801572	388076468	361376171	268566768	411437599
TOTAL	4406297312	2808919417	2731542894	3280239070	2874317728	2535882999	1803287142	2938552528
Compound	CP_control_1	CP_control_2	CP_control_3	CP_control_4	CP_isoprenaline_1	CP_isoprenaline_2	CP_isoprenaline_3	CP_isoprenaline_4
3-Phospho-D-glycerate-0	3236858	23687100	10515230	4368299	10356218	3027969	28210726	3803777
3-Phospho-D-glycerate-1	38345	2604921	725070	18605	1368527		2823725	197511
3-Phospho-D-glycerate-2	112688	2071063	490818	29016	1497305	29581	1487240	64249
3-Phospho-D-glycerate-3	9564289	45085098	16253628	8610452	15185507	4473295	22012411	6863053
TOTAL	12952180	73448182	27984746	13026372	28407557	7530845	54534102	10928590
Compound	CP_control_1	CP_control_2	CP_control_3	CP_control_4	CP_isoprenaline_1	CP_isoprenaline_2	CP_isoprenaline_3	CP_isoprenaline_4
6-Phospho-D-gluconate-0C		2652754	2961845	2287695	2482583	2146143	141442	2280786
6-Phospho-D-gluconate-1C		532148	216868	138062	603406	120057		405637
6-Phospho-D-gluconate-2C		1273970	683307	568591	1150863	545132	6781	1183621
6-Phospho-D-gluconate-3C		3103182	2149611	1809933	2434434	1516275	43581	2487888
6-Phospho-D-gluconate-4C		1188912	519171	226182	1041361	190970		893098
6-Phospho-D-gluconate-5C		3002345	1260229	1454812	2168979	889538	22888	2283172
6-Phospho-D-gluconate-6C		7553790	5442630	5672320	5419800	3524525	221294	5508692
TOTAL		19307101	13233661	12157595	15301426	8932640	435986	15042894
Compound	CP_control_1	CP_control_2	CP_control_3	CP_control_4	CP_isoprenaline_1	CP_isoprenaline_2	CP_isoprenaline_3	CP_isoprenaline_4
Acetyl-CoA-0C	6182778	18825387	8942527	6306709	15505214	2981063	13481583	6143996
Acetyl-CoA-1C	1276443	4025597	2043400	690187	2765896	534390	3332170	1236903
Acetyl-CoA-2C	98291	638352	986103	51183	1013222	140839	1326965	172968
TOTAL	7557512	23489336	11972030	7048079	19284332	3656292	18140718	7553867
Compound	CP_control_1	CP_control_2	CP_control_3	CP_control_4	CP_isoprenaline_1	CP_isoprenaline_2	CP_isoprenaline_3	CP_isoprenaline_4
Adenosine-0C	162051064	296437749	490605904	466915956	566328292	244244362	97233800	431490523
Adenosine-1C	14470585	32569443	54747668	53913573	64937665	27491042	8428044	48588253
Adenosine-2C	634965	4009751	10207423	10031906	10856347	4070213	371660	8784685
Adenosine-3C	1066451	4271571	10130433	9560992	10104474	5355709	479226	7958746
Adenosine-4C		1743737	2693776	1390585	3508034	760538		3888603
Adenosine-5C	3826323	9943960	15631636	18793420	19171471	8703210	1182447	15382125
TOTAL	182049388	348976211	584016840	560606432	674906283	290625074	107695177	516092935
Compound	CP_control_1	CP_control_2	CP_control_3	CP_control_4	CP_isoprenaline_1	CP_isoprenaline_2	CP_isoprenaline_3	CP_isoprenaline_4
AMP-0C	N/F	22411787	7571167	4814438	23609244	472243	5365905	6013432
Compound	CP_control_1	CP_control_2	CP_control_3	CP_control_4	CP_isoprenaline_1	CP_isoprenaline_2	CP_isoprenaline_3	CP_isoprenaline_4
ATP-0C	638203217	728706203	716660792	669639520	641753036	385412436	657396672	573232060
ATP-1C	88164001	100815616	103663607	94368994	90670993	53487400	93671471	83108007
ATP-2C	43727588	47610735	58229624	54081855	38858740	30556580	51026951	40885267
ATP-3C	26518109	27322708	39117399	36575562	26469713	21608665	31810307	22749698
ATP-4C	14318901	15975433	18890147	15912287	14674964	8054561	15337923	12273071
ATP-5C	58657175	57197572	62175583	71118881	42628316	33075454	47377699	41413365
ATP-6C	2190711	2172374	3919757	3194818	1597817	1736848	2673911	2167346
ATP-7C	215520	210524	862168	426855	426482	390806	229139	575855
TOTAL	871995222	980011165	1003519077	945318772	857080061	534322750	899524073	776404669
Compound	CP_control_1	CP_control_2	CP_control_3	CP_control_4	CP_isoprenaline_1	CP_isoprenaline_2	CP_isoprenaline_3	CP_isoprenaline_4
cis-Aconitate-0C	22280758	42971406	44436044	17934045	66946850	11584796	41682153	26943902
cis-Aconitate-1C	2138614	4612534	4522124	1743773	6723736	917932	4021529	2615429
cis-Aconitate-2C	3701860	7128819	8708184	3010944	9923273	1591279	6822557	3822293
cis-Aconitate-3C	639824	1293593	1705942	630570	1902620	252060	1431386	687099
TOTAL	28761056	56006352	59372294	23319332	85496479	14346067	53957625	34068723
Compound	CP_control_1	CP_control_2	CP_control_3	CP_control_4	CP_isoprenaline_1	CP_isoprenaline_2	CP_isoprenaline_3	CP_isoprenaline_4
Citrate-0C	200879897	742468184	381181246	198223824	844797940	120281709	422656925	263986469
Citrate-1C	22326558	82463228	40458972	20725694	88324630	11611889	41701298	27738333
Citrate-2C	35566675	129674540	76968908	36667507	131481100	18660604	72142154	40863313
Citrate-3C	6870451	24203239	15932219	7225426	25593704	3905196	14175557	7853807
Citrate-4C	1957232	6959200	4716062	2036706	6428618	904915	3996136	1917010
Citrate-5C	391554	1926459	1864130	642273	1590376	273376	1487384	510228
TOTAL	267992367	987694850	521121537	265521430	1098216368	155637689	556159454	342869160
Compound	CP_control_1	CP_control_2	CP_control_3	CP_control_4	CP_isoprenaline_1	CP_isoprenaline_2	CP_isoprenaline_3	CP_isoprenaline_4
Cyclic AMP-0C	4662151	4749807	6409705	4420353	6051181	3237272	4475214	6766172
Cyclic AMP-1C	410998	409772	499065	358542	516346	267750	364665	609087
Cyclic AMP-2C	23869	37858	88448	93057	40820	50228	19728	48234
Cyclic AMP-3C	22073	8642	80044	52518	73464	31930	11629	34973
Cyclic AMP-5C	178163	40629	195037	146425	86133	12477	81074	67482
TOTAL	5297254	5246708	7272299	5070895	6767944	3599657	4952310	7525948
Compound	CP_control_1	CP_control_2	CP_control_3	CP_control_4	CP_isoprenaline_1	CP_isoprenaline_2	CP_isoprenaline_3	CP_isoprenaline_4
dATP-0C	15091850	15379443	14947016	10564486	17659058	6687365	13764396	10324875
Compound	CP_control_1	CP_control_2	CP_control_3	CP_control_4	CP_isoprenaline_1	CP_isoprenaline_2	CP_isoprenaline_3	CP_isoprenaline_4
D-Fructose 1,6-bisphosphate-0C	5664125	4860964	8707870	8046974	3588404	3752268	3767255	3881865
D-Fructose 1,6-bisphosphate-1C	640208	524190	823127	657255	420829	228878	349054	222903
D-Fructose 1,6-bisphosphate-2C	730449	643132	769476	774582	457383	210203	338144	514003
D-Fructose 1,6-bisphosphate-3C	9660521	10728824	11883203	16765457	5042618	6899817	4597439	7492179
D-Fructose 1,6-bisphosphate-4C	1319158	1251148	1282932	1461129	824306	620477	635383	803282
D-Fructose 1,6-bisphosphate-5C	1869352	1263693	1266634	1345727	699567	418557	445902	831036
D-Fructose 1,6-bisphosphate-6C	19583526	14857559	16813100	21923871	7390501	8222323	6713768	9451680
TOTAL	39467339	34129510	41546342	50974995	18423608	20352523	16846945	23196948
Compound	CP_control_1	CP_control_2	CP_control_3	CP_control_4	CP_isoprenaline_1	CP_isoprenaline_2	CP_isoprenaline_3	CP_isoprenaline_4
D-Ribose 1,5-bisphosphate-0C		100566	61123	27130	25574	7345	29468
D-Ribose 1,5-bisphosphate-2C		150481	129157	76420	160745	25048	60657
D-Ribose 1,5-bisphosphate-3C		123363	131410	69944	154267	25922	117129
D-Ribose 1,5-bisphosphate-5C		844416	335884	374018	503768	60227	304971
TOTAL		1218826	657574	547512	844354	118542	512225
Compound	CP_control_1	CP_control_2	CP_control_3	CP_control_4	CP_isoprenaline_1	CP_isoprenaline_2	CP_isoprenaline_3	CP_isoprenaline_4
D-Ribose 5-phosphate-0C	5368951	1798305	2810605	2246842	1696568	1322279	5665584	1261953
D-Ribose 5-phosphate-1C	913788	237517	195906	87069	488033	N/F	1426175	119568
D-Ribose 5-phosphate-2C	4967899	3672824	3804159	3501599	2788716	1846720	3891041	2599451
D-Ribose 5-phosphate-3C	4390516	2903754	3419043	3422657	2303744	1671512	3285835	1815685
D-Ribose 5-phosphate-4C	3199346	833706	635756	430046	1064923	125008	1716962	604121
D-Ribose 5-phosphate-5C	19001314	7067731	5503931	7223787	4406406	2623184	9791098	3703006
TOTAL	37841814	16513837	16369400	16912000	12748390	7588703	25776695	10103784
Compound	CP_control_1	CP_control_2	CP_control_3	CP_control_4	CP_isoprenaline_1	CP_isoprenaline_2	CP_isoprenaline_3	CP_isoprenaline_4
Hypoxanthine-0C	58185692	2234232	22245134	15287866	8241489	11861749	50023452	5092495
Compound	CP_control_1	CP_control_2	CP_control_3	CP_control_4	CP_isoprenaline_1	CP_isoprenaline_2	CP_isoprenaline_3	CP_isoprenaline_4
Inosine-0C	55021783	1556673	21054469	12383975	7408092	9967280	49538827	3342256
Compound	CP_control_1	CP_control_2	CP_control_3	CP_control_4	CP_isoprenaline_1	CP_isoprenaline_2	CP_isoprenaline_3	CP_isoprenaline_4
NADP+-0C	41354809	17445418	30548259	21764058	25301359	509229	53099201	15534811
NADP+-1C	10476911	5497104	8800766	5306013	6855770	3221716	14464054	4861265
NADP+-2C	2330440	647446	1626684	119125	1434742	215781	4957203	495710
TOTAL	54162160	23589968	40975709	27189196	33591871	3946726	72520458	20891786
Compound	CP_control_1	CP_control_2	CP_control_3	CP_control_4	CP_isoprenaline_1	CP_isoprenaline_2	CP_isoprenaline_3	CP_isoprenaline_4
NADPH-0C	5336861	32220036	32541971	17539827	33837390	11209308	4054368	19848172
NADPH-1C	1012442	8371524	8147296	3444868	9331040	2358894	1805993	5241241
NADPH-2C	96860	2723679	3001969	610401	3016579	415532	138629	1021239
TOTAL	6446163	43315239	43691236	21595096	46185009	13983734	5998990	26110652
Compound	CP_control_1	CP_control_2	CP_control_3	CP_control_4	CP_isoprenaline_1	CP_isoprenaline_2	CP_isoprenaline_3	CP_isoprenaline_4
GDP-0C	8117720	10107060	9456301	8936856	9363494	5975497	10088215	7601799
GDP-1C	892545	1244376	1256896	835888	1202207	637810	1283207	625520
GDP-2C	207730	364449	506684	145377	289984	70554	433489	182496
GDP-3C	44776	224378	324398	42648	209828	59673	333643	20204
GDP-5C	519354	628884	638682	409186	472343	95536	486192	176725
TOTAL	9782125	12569147	12182961	10369955	11537856	6839070	12624746	8606744
Compound	CP_control_1	CP_control_2	CP_control_3	CP_control_4	CP_isoprenaline_1	CP_isoprenaline_2	CP_isoprenaline_3	CP_isoprenaline_4
GMP-0C	243434	1281050	1179726	760197	1307309	521330	840136	714650
Compound	CP_control_1	CP_control_2	CP_control_3	CP_control_4	CP_isoprenaline_1	CP_isoprenaline_2	CP_isoprenaline_3	CP_isoprenaline_4
GTP-0C	8321065	14079051	11786921	11179621	14209815	10513656	13327580	10161142
GTP-1C	916008	1639392	1409514	1294352	1698061	1127456	1590311	1175701
GTP-2C	167772	339691	643299	545941	342416	587393	693323	353651
GTP-3C	160535	288770	454695	389700	313759	300016	484586	245465
GTP-4C	50223	121141	141888	47365	118353	71226	162973	48580
GTP-5C	568253	877463	810067	790052	650185	537748	675980	507306
TOTAL	10183856	17345508	15246384	14247031	17332589	13137495	16934753	12491845
Compound	CP_control_1	CP_control_2	CP_control_3	CP_control_4	CP_isoprenaline_1	CP_isoprenaline_2	CP_isoprenaline_3	CP_isoprenaline_4
IMP-0C	179324	496172	506610	206692	358640	30845	226253
Compound	CP_control_1	CP_control_2	CP_control_3	CP_control_4	CP_isoprenaline_1	CP_isoprenaline_2	CP_isoprenaline_3	CP_isoprenaline_4
Xanthine-0C	65969	854732	668859	78428	1160691	141749	1104738	332002
Compound	CP_control_1	CP_control_2	CP_control_3	CP_control_4	CP_isoprenaline_1	CP_isoprenaline_2	CP_isoprenaline_3	CP_isoprenaline_4
Xanthosine 5'-phosphate-0C	501182	59005	227235	350121	153816	27532	78371	7212
Compound	CP_control_1	CP_control_2	CP_control_3	CP_control_4	CP_isoprenaline_1	CP_isoprenaline_2	CP_isoprenaline_3	CP_isoprenaline_4
(S)-Malate-0C	845400743	606394453	1046511990	974806589	688214493	576473263	695924295	910951875
(S)-Malate-1C	71092347	53604836	82242209	77794894	55215642	42301234	51589351	75267813
(S)-Malate-2C	49409847	39102399	60710206	58067492	38798919	20697126	30569505	51889266
(S)-Malate-3C	23066391	17049371	40206292	30794758	18291671	19225248	22550924	23922754
(S)-Malate-4C	295544	252122	861023	724435	268177	353471	299678	308097
TOTAL	989264872	716403181	1230531720	1142188168	800788902	659050342	800933753	1062339805
Compound	CP_control_1	CP_control_2	CP_control_3	CP_control_4	CP_isoprenaline_1	CP_isoprenaline_2	CP_isoprenaline_3	CP_isoprenaline_4
2-Oxoglutarate-0C	84124647	45841827	102711358	70217408	52689166	32763990	53084719	56148931
2-Oxoglutarate-1C	6603579	3416344	7638966	5302676	3575068	1964213	3706025	4175794
2-Oxoglutarate-2C	6378770	3219062	8613419	5432974	3097280	1994728	3590998	3928593
2-Oxoglutarate-3C	551725	130304	768921	496864	73231	68009	122274	161985
TOTAL	97658721	52607537	119732664	81449922	59434745	36790940	60504016	64415303
Compound	CP_control_1	CP_control_2	CP_control_3	CP_control_4	CP_isoprenaline_1	CP_isoprenaline_2	CP_isoprenaline_3	CP_isoprenaline_4
D-Fructose 6-phosphate-0C	23212315	18587950	27484729	21829304	27114708	16873859	25129422	24436933
D-Fructose 6-phosphate-1C	2101679	1386116	2192089	1322201	3334507	1163966	2921775	3713456
D-Fructose 6-phosphate-2C	4514813	2934719	2806329	1534730	7279330	1522816	4174837	6278970
D-Fructose 6-phosphate-3C	17396519	17300327	16724833	13697748	22574184	11684951	16152577	23595727
D-Fructose 6-phosphate-4C	7616231	5876575	3734981	2661726	9950633	2390012	4398027	9236403
D-Fructose 6-phosphate-5C	9860228	7767275	4491192	3321510	10450928	2742343	4865001	10280769
D-Fructose 6-phosphate-6C	89747927	71653131	68997103	69917781	81364740	45064751	59899716	77475075
TOTAL	154449712	125506093	126431256	114285000	162069030	81442698	117541355	155017333
Compound	CP_control_1	CP_control_2	CP_control_3	CP_control_4	CP_isoprenaline_1	CP_isoprenaline_2	CP_isoprenaline_3	CP_isoprenaline_4
D-Glucose 6-phosphate-0C	15155273	33403017	30637382	18183384	44376804	15562833	40307153	25455624
D-Glucose 6-phosphate-1C	2219769	6269020	4182038	1994106	11336493	2339570	7219560	6492278
D-Glucose 6-phosphate-2C	3593921	14148887	6926850	2212996	20725290	2791943	12871937	9497112
D-Glucose 6-phosphate-3C	10964879	31960795	15392550	10420414	41766422	10998574	26471239	27727574
D-Glucose 6-phosphate-4C	5184641	10954379	2537188	2023943	19328969	2953563	6654181	11872783
D-Glucose 6-phosphate-5C	6421031	14526572	5315361	3156567	21154705	3316650	9655097	12220346
D-Glucose 6-phosphate-6C	44990715	93008691	52401087	39679131	99106300	29166403	64099321	61242125
TOTAL	88530229	204271361	117392456	77670541	257794983	67129536	167278488	154507842
Compound	CP_control_1	CP_control_2	CP_control_3	CP_control_4	CP_isoprenaline_1	CP_isoprenaline_2	CP_isoprenaline_3	CP_isoprenaline_4
D-Glucose-0C	26238992	11641833	31080523	19515426	23339968	45246778	25904264	24440963
D-Glucose-6C	84127428	34424830	60619271	54474303	52019512	93613492	47502849	64133034
TOTAL	110366420	46066663	91699794	73989729	75359480	138860270	73407113	88573997
Compound	CP_control_1	CP_control_2	CP_control_3	CP_control_4	CP_isoprenaline_1	CP_isoprenaline_2	CP_isoprenaline_3	CP_isoprenaline_4
D-Glyceraldehyde 3-phosphate-0C	51100664	95293030	94449524	53336747	96517442	24895443	76832528	47671677
D-Glyceraldehyde 3-phosphate-1C	1601787	3344990	3605184	1717600	3533379	632778	2711027	1511939
D-Glyceraldehyde 3-phosphate-2C	180570	191808	388891	147448	30385	324016	363289	347092
D-Glyceraldehyde 3-phosphate-3C	6651022	12856468	15363035	8725967	11518713	3534972	10561043	5645345
TOTAL	59534043	111686296	113806634	63927762	111599919	29387209	90467887	55176053
Compound	CP_control_1	CP_control_2	CP_control_3	CP_control_4	CP_isoprenaline_1	CP_isoprenaline_2	CP_isoprenaline_3	CP_isoprenaline_4
D-Sedoheptulose 7-phosphate-0C	18811956	14482059	20490877	21125500	18201683	15347269	16745693	15777076
D-Sedoheptulose 7-phosphate-1C	2534807	1799592	2706897	1865901	4146355	1725747	3138291	2644032
D-Sedoheptulose 7-phosphate-2C	2381897	1259437	2217796	1000000	4177088	1152283	2698984	2265885
D-Sedoheptulose 7-phosphate-3C	6043910	3445579	5342848	3246601	8642268	3163872	6065226	5878908
D-Sedoheptulose 7-phosphate-4C	9014857	5523560	6840957	5256523	12332429	4189521	7265870	8244462
D-Sedoheptulose 7-phosphate-5C	5021895	2785078	3144595	2049119	6868122	1364037	3775731	4114213
D-Sedoheptulose 7-phosphate-6C	6038795	3058965	3033913	2049736	7470071	1685830	3397102	4821799
D-Sedoheptulose 7-phosphate-7C	13898526	7938524	7902087	7523524	13393144	4635331	7166961	9169892
TOTAL	63746643	40292794	51679970	44116904	75231160	33263890	50253858	52916267
Compound	CP_control_1	CP_control_2	CP_control_3	CP_control_4	CP_isoprenaline_1	CP_isoprenaline_2	CP_isoprenaline_3	CP_isoprenaline_4
Glycerone phosphate-0C	872947	4345666	1860878	3019003	2376571	992250	1237487	1294914
Glycerone phosphate-3C	4405743	10513052	4146974	6246483	4138209	2325658	2708056	3104641
TOTAL	5278690	14858718	6007852	9265486	6514780	3317908	3945543	4399555
Compound	CP_control_1	CP_control_2	CP_control_3	CP_control_4	CP_isoprenaline_1	CP_isoprenaline_2	CP_isoprenaline_3	CP_isoprenaline_4
Pyruvate-0C	2006742	7832611	3976085	3800358	2531802	3921124	1759782	4904126
Compound	CP_control_1	CP_control_2	CP_control_3	CP_control_4	CP_isoprenaline_1	CP_isoprenaline_2	CP_isoprenaline_3	CP_isoprenaline_4
Succinate-0C	38539919	41122374	37746662	41099642	55976900	39995856	41835752	49001122
Succinate-1C	2675415	2972717	2356490	2535642	3806671	2217467	2513802	3621327
Succinate-2C	1992338	2303664	2273078	2443311	3154319	1903761	2221839	3237286
TOTAL	43207672	46398755	42376230	46078595	62937890	44117084	46571393	55859735
Compound	CP_control_1	CP_control_2	CP_control_3	CP_control_4	CP_isoprenaline_1	CP_isoprenaline_2	CP_isoprenaline_3	CP_isoprenaline_4
L-Glutamine-0C	1048036220	2980046913	1193099823	786143197	4275135673	1238434965	3070537013	947990052
L-Glutamine-1C	69439791	203306526	76395285	49997153	277964434	71471821	191075958	65106299
L-Glutamine-2C	28696682	92896492	33224502	22989877	97522593	16913490	68380463	29586967
L-Glutamine-3C	1633965	10823404	3051259	1714881	10325250	1077909	7662645	1761628
TOTAL	1147806658	3287073335	1305770869	860845108	4660947950	1327898185	3337656079	1044444946
Compound	M_control_1	M_control_2	M_control_3	M_control_4	M_isoprenaline_1	M_isoprenaline_2	M_isoprenaline_3	M_isoprenaline_4
(S)-Lactate-0C	3672899156	4080388478	3232953309	3987811279	3680355115	1578295747	3178802735	3789792640
(S)-Lactate-1C	151278974	168660698	135510365	164619821	154859163	63907323	133327125	158332788
(S)-Lactate-2C	22362443	23598988	21144125	22522703	21830826	7785626	19236634	23388243
(S)-Lactate-3C	590282480	665353642	526704578	713470901	495779079	229181095	464049539	534701428
TOTAL	4436823053	4938001806	3916312377	4888424704	4352824183	1879169791	3795416033	4506215099
Compound	M_control_1	M_control_2	M_control_3	M_control_4	M_isoprenaline_1	M_isoprenaline_2	M_isoprenaline_3	M_isoprenaline_4
Urate-0C	19116373	32086244	24466761	27527387	38697177	13888771	4509502	3498371
